# Supplementary material
Source: PubMed Central journal article supplement (PMC5497681)

**Ligand-Enabled Meta-Selective C–H Arylation of Nosyl Protected Phenethylamines,  
Benzylamines and 2-Aryl Anilines**

Qiuping Ding, Shengqing Ye, Guolin Cheng, Peng Wang, Marcus E. Farmer, Jin-Quan Yu\*

Department of Chemistry, The Scripps Research Institute, 10550 North Torrey Pines Road, La  
Jolla, California 92037

**Table of Contents**

|                                                           |     |
|-----------------------------------------------------------|-----|
| 1. General Information                                    | S2  |
| 2. Structures of Substrates                               | S3  |
| 3. Experimental Section                                   | S3  |
| 3.1 Optimization of Reaction Conditions                   | S3  |
| 3.2 Substrates Preparation                                | S10 |
| 3.3 <i>Meta</i> -Arylation of Substituted Phenethylamines | S21 |
| 3.4 <i>Meta</i> -Arylation of 2-Aryl aniline Derivatives  | S42 |
| 3.5 <i>Meta</i> -Arylation of $\beta$ -Aryl Dipeptides    | S46 |
| 3.6 <i>Meta</i> -Arylation of Benzylamine                 | S50 |
| 3.7 Deprotection of <b>3aa</b>                            | S54 |
| 3.8 Application                                           | S55 |
| 4. References                                             | S55 |
| 5. $^1\text{H}$ and $^{13}\text{C}$ NMR Spectra           | S56 |

## 1. General Information

Amines, aryl halides and pyridine ligands were obtained from the commercial sources or synthesized following literature procedures. Pd(OAc)<sub>2</sub> was obtained from Strem. AgOAc was purchased from Sigma-Aldrich. Solvents were obtained from Sigma-Aldrich, Alfa-Aesar and Acros and used directly without further purification. Analytical thin layer chromatography was performed on 0.25 mm silica gel 60-F254. Visualization was carried out with UV light and Vogel's permanganate. <sup>1</sup>H NMR was recorded on Varian (400 MHz) or Bruker DRX-500 instrument (500 MHz). Chemical shifts were quoted in parts per million (ppm) referenced to 0.0 ppm of tetramethylsilane or 2.05 ppm of acetone-*d*. The following abbreviations (or combinations thereof) were used to explain multiplicities: s = singlet, d = doublet, t = triplet, q = quartet, m = multiplet, br = broad. Coupling constants, *J*, were reported in Hertz unit (Hz). <sup>13</sup>C NMR spectra were recorded on Varian (100 MHz), Bruker DRX-500 instrument (125 MHz), and were fully decoupled by broad band proton decoupling. Chemical shifts were reported in ppm referenced to either the center line of a triplet at 77.00 ppm of chloroform-*d* or 206.26 ppm singlet of acetone-*d*. High-resolution mass spectra (HRMS) were recorded on an Agilent Mass spectrometer using ESI-TOF (electrospray ionization-time of flight).

## 2. Structures of Substrates

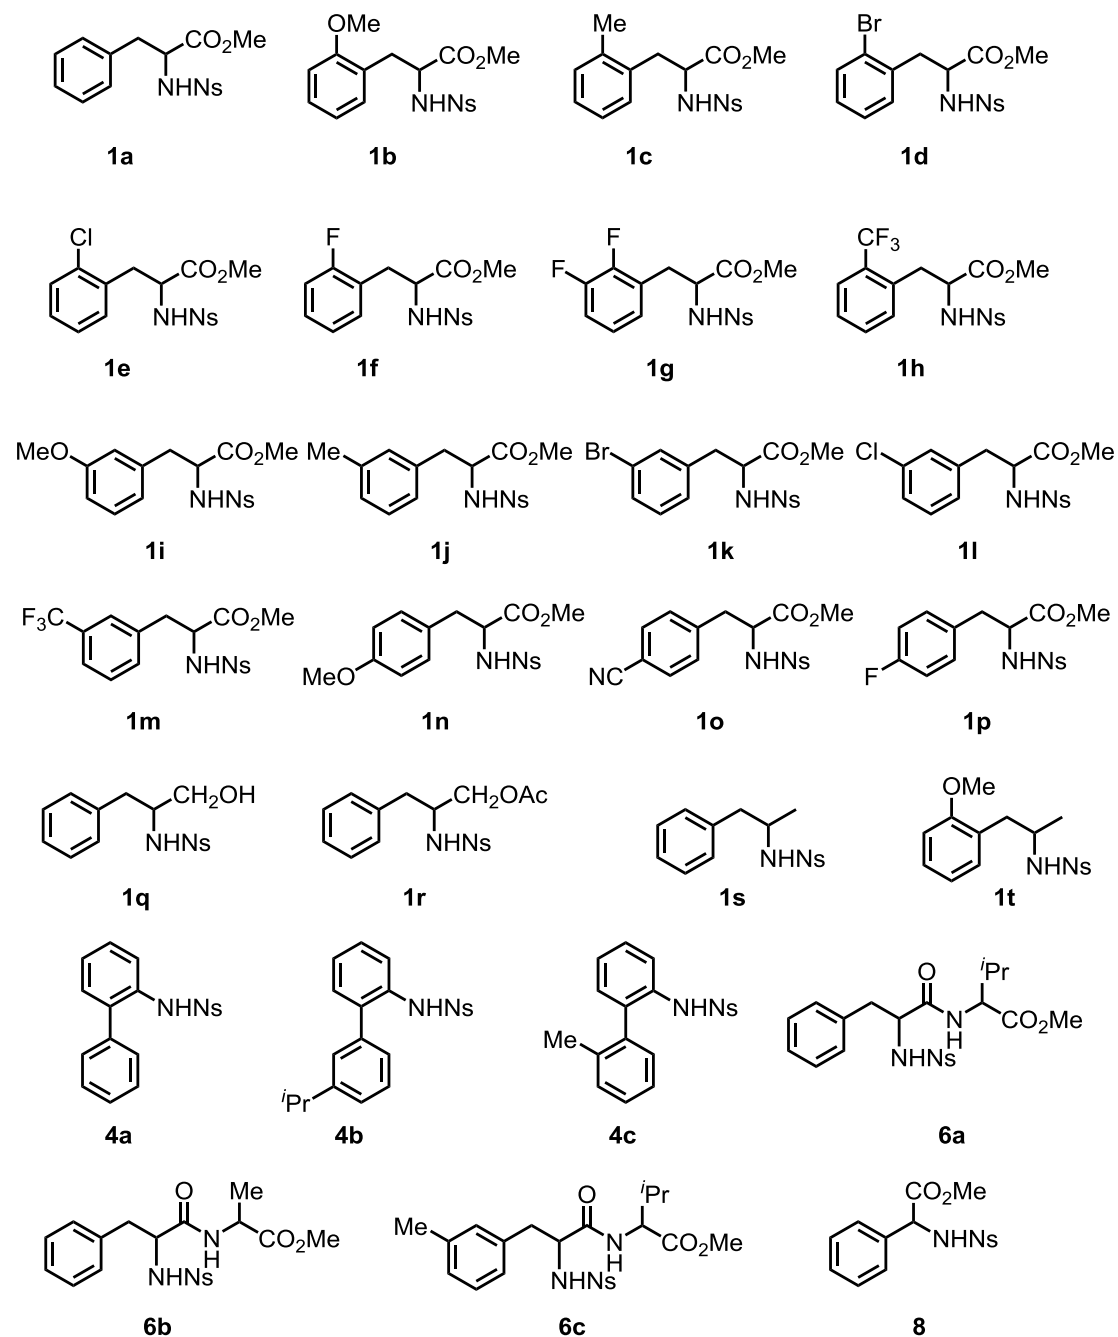

## 3. Experimental Section

### 3.1 Optimization of Reaction Conditions

**Table 1. Investigation of Directing Groups to Direct *meta*-C-H Arylation<sup>a,b</sup>**

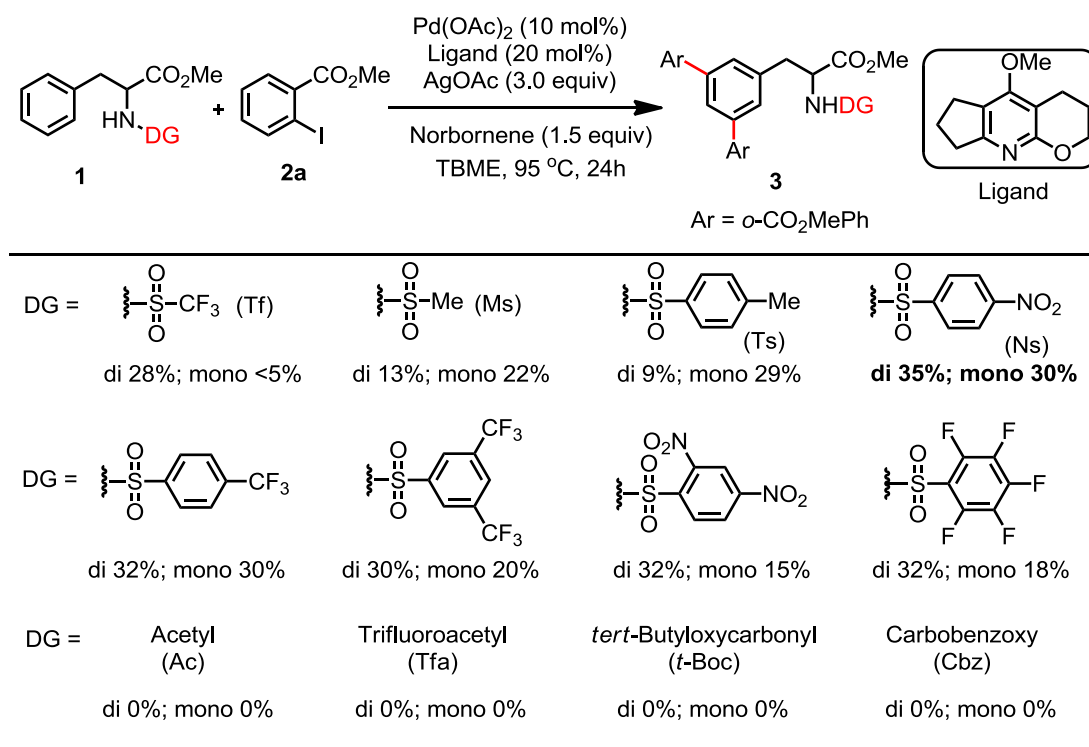

<sup>a</sup>Reaction conditions: 0.1 mmol of phenethylamine **1**, 3.0 equiv of methyl 2-iodobenzoate **2a**, 10 mol% of Pd(OAc)<sub>2</sub>, 20 mol% of ligand, 1.5 equiv of 2-norbornene, 3.0 equiv of AgOAc, 1.0 mL of TBME, 95 °C, under air, 24 h. <sup>b</sup>Yields of the mono- and di-products were determined by <sup>1</sup>H NMR using dibromomethane as an internal standard.

**Table 2. Screening of Ligands for *meta*-C-H Arylation of Phenethylamine-Derived Sulfamide**

**1a**<sup>a,b</sup>

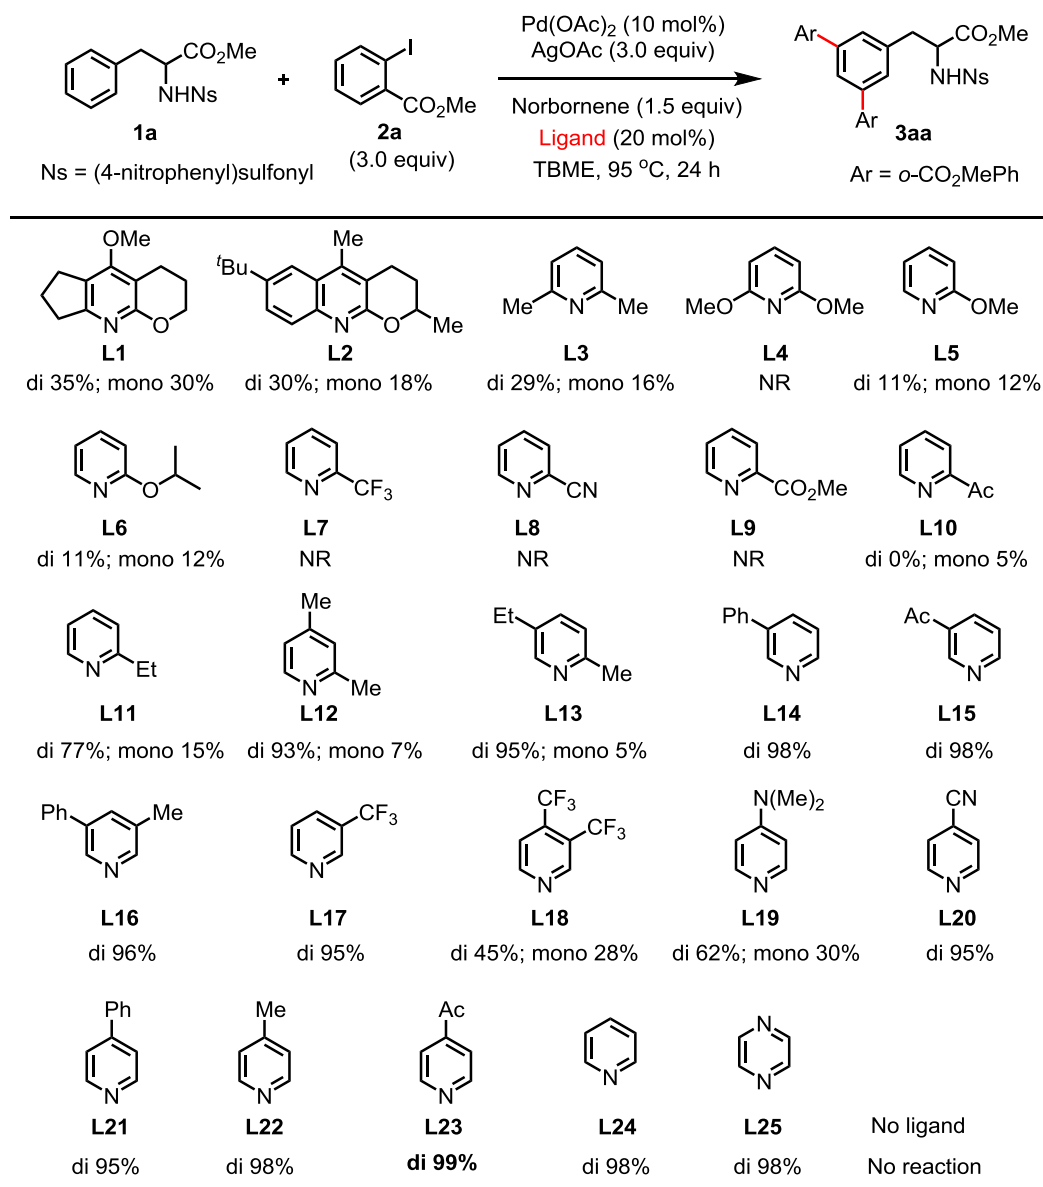

<sup>a</sup>Reaction conditions: 0.1 mmol of phenethylamine **1a**, 3.0 equiv of methyl 2-iodobenzoate **2a**, 10 mol% of Pd(OAc)<sub>2</sub>, 20 mol% of ligand, 1.5 equiv of norbornene, 3.0 equiv of AgOAc, 1.0 mL of TBME, 95 °C, under air, 24 h. <sup>b</sup>Yields of the mono- and di-products were determined by <sup>1</sup>H NMR using dibromomethane as an internal standard.

**Table 3. Screening of oxidant**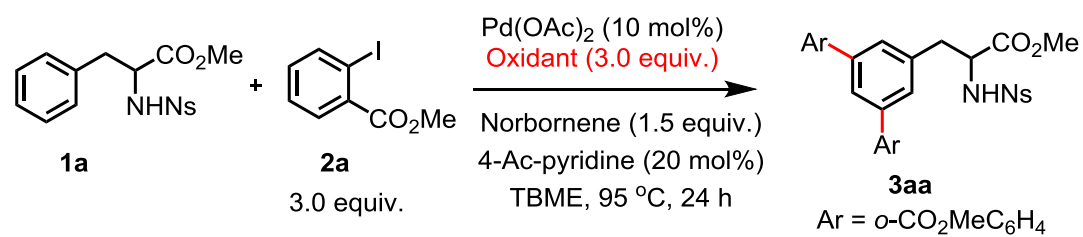

| entry | oxidant                         | yield (%) of di- | yield (%) of mono- |
|-------|---------------------------------|------------------|--------------------|
| 1     | AgOAc                           | 99               | 1                  |
| 2     | AdCO <sub>2</sub> Ag            | 97               | 3                  |
| 3     | PhCO <sub>2</sub> Ag            | 89               | 11                 |
| 4     | Ag <sub>2</sub> CO <sub>3</sub> | 74               | 16                 |
| 5     | Ag <sub>2</sub> O               | 6                | 16                 |
| 6     | AgOTs                           | 0                | 0                  |
| 7     |                                 | 74               | 20                 |

<sup>a</sup> Yields of products were based on phenylalanine **1a** and determined by <sup>1</sup>H NMR using dibromomethane as internal standard.

**Table 4. Screening of solvent**

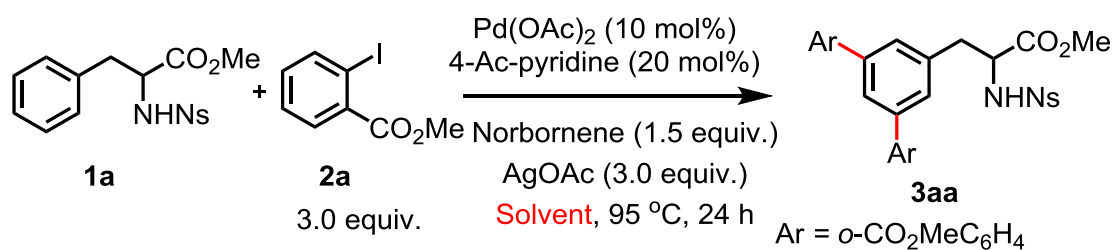

| Entry    | Solvent                    | Yield (%) <sup>a</sup> of di-/mono-/SM |
|----------|----------------------------|----------------------------------------|
| <b>1</b> | <b>TBME</b>                | <b>99/1/0</b>                          |
| 2        | <i>i</i> Pr <sub>2</sub> O | 88/12/0                                |
| 3        | DCE                        | 84/10/6                                |
| 4        | THF                        | 80/20/0                                |
| 5        | Toluene                    | 98/0/0                                 |
| 6        | PhCF <sub>3</sub>          | 98/2/0                                 |
| 7        | EtOAc                      | 90/10/0                                |
| 8        | MeCN                       | 44/38/20                               |
| 9        | 1,4-Dioxane                | 78/13/9                                |
| 10       | <i>t</i> BuOH              | 42/40/18                               |

<sup>a</sup> Yields of products were based on phenylalanine **1a** and determined by <sup>1</sup>H NMR using dibromomethane as internal standard.

**Table 5. Screening of [Pd] catalyst**

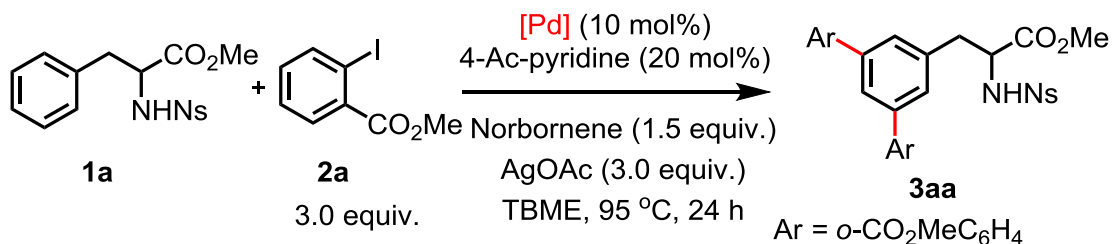

| Entry | [Pd]                                                | Yield (%) <sup>a</sup> of di-/mono-/SM |
|-------|-----------------------------------------------------|----------------------------------------|
| 1     | Pd(OAc) <sub>2</sub>                                | 99/1/0                                 |
| 2     | Pd(O <sub>2</sub> CET) <sub>2</sub>                 | 98/2/0                                 |
| 3     | PdI <sub>2</sub>                                    | 98/2/0                                 |
| 4     | Pd(TFA) <sub>2</sub>                                | 80/12/8                                |
| 5     | PdCl <sub>2</sub> (CH <sub>3</sub> CN) <sub>2</sub> | 90/10/0                                |
| 6     | PdCl <sub>2</sub> (allyl) <sub>2</sub>              | 64/32/4                                |
| 7     | Pd(PPh <sub>3</sub> ) <sub>2</sub> Cl <sub>2</sub>  | 90/10/0                                |
| 8     | Pd(acac) <sub>2</sub>                               | 60/30/10                               |
| 9     | Pd(OPiv) <sub>2</sub>                               | 0/4/96                                 |
| 10    | ---                                                 | 0/0/100                                |

<sup>a</sup> Yields of products were based on phenylalanine **1a** and determined by <sup>1</sup>H NMR using dibromomethane as internal standard.

**Table 6. Screening the loading of Pd(OAc)<sub>2</sub>**

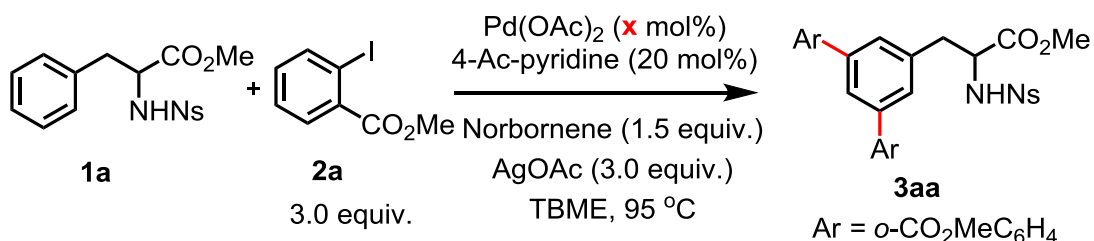

| Entry    | x         | Time (h)  | Yield (%) <sup>a</sup> of di-/mono-/SM |
|----------|-----------|-----------|----------------------------------------|
| 1        | 0         | 48        | 0/0/100                                |
| 2        | 2.5       | 48        | 48/42/10                               |
| 3        | 5         | 24        | 85/15/0                                |
| <b>4</b> | <b>10</b> | <b>12</b> | <b>99/1/0</b>                          |

<sup>a</sup> Yields of products were based on phenylalanine **1a** and determined by <sup>1</sup>H NMR using dibromomethane as internal standard.



**Table 7. Screening the loading of 2-Norbornene.**

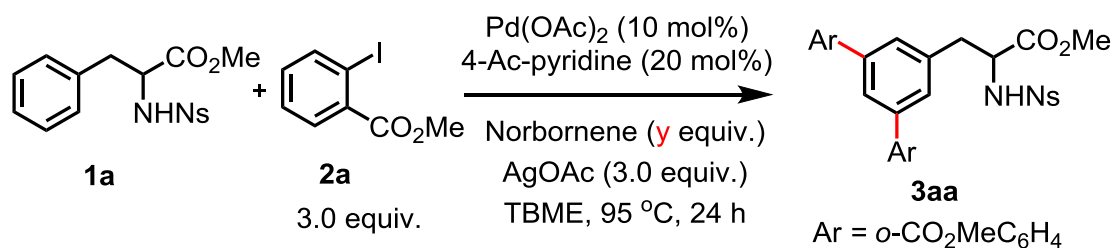

| Entry    | $y$        | Yield (%) <sup>a</sup> of di-/mono-/SM |
|----------|------------|----------------------------------------|
| 1        | 1.5        | 99/1/0                                 |
| 2        | 1.0        | 99/1/0                                 |
| 3        | 0.5        | 99/1/0                                 |
| 4        | 0.4        | 99/1/0                                 |
| 5        | 0.3        | 99/1/0                                 |
| <b>6</b> | <b>0.2</b> | <b>99/1/0</b>                          |
| 7        | 0.1        | 69/24/7                                |
| 8        | 0          | 0/0/0                                  |

<sup>a</sup> Yields of products were based on phenylalanine **1a** and determined by <sup>1</sup>H NMR using dibromomethane as internal standard.

**Table 8. Screening the equivalents of AgOAc**

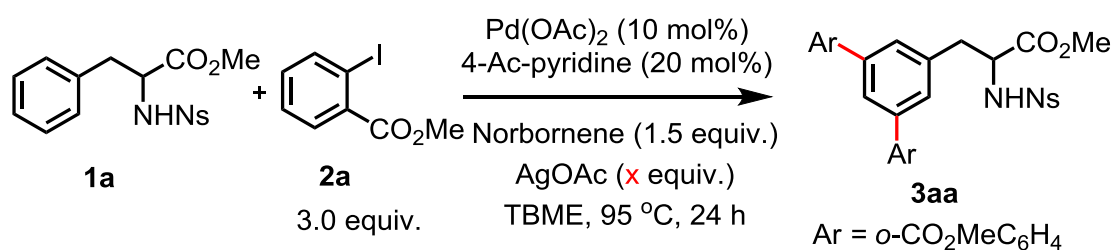

| Entry    | $x$        | Yield (%) <sup>a</sup> of di-/mono-/SM |
|----------|------------|----------------------------------------|
| 1        | 0          | 0/0/100                                |
| 2        | 2.0        | 55/33/12                               |
| 3        | 2.5        | 88/12/0                                |
| <b>4</b> | <b>3.0</b> | <b>99/1/0</b>                          |

<sup>a</sup> Yields of products were based on phenylalanine **1a** and determined by <sup>1</sup>H NMR using dibromomethane as internal standard.

**Table 9. Screening the reaction temperature**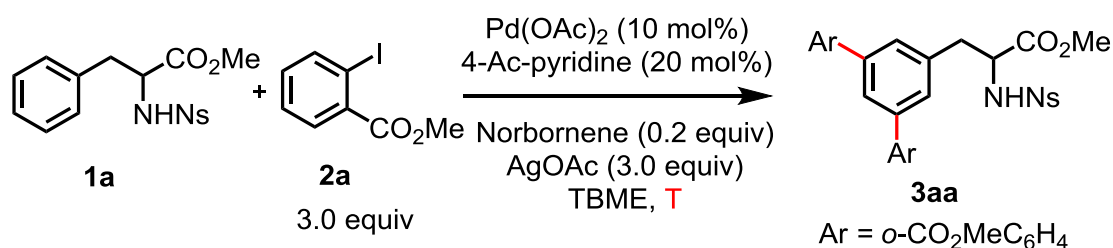

| Entry    | T (°C)    | Time (h)  | Yield (%) <sup>a</sup> of di-/mono-/SM |
|----------|-----------|-----------|----------------------------------------|
| 1        | 25        | 72        | 10/20/70                               |
| 2        | 60        | 48        | 95/3/2                                 |
| <b>3</b> | <b>80</b> | <b>12</b> | <b>99/1/0</b>                          |
| 4        | 95        | 12        | 99/1/0                                 |
| 5        | 110       | 12        | 99/0/0                                 |

<sup>a</sup> Yields of products were based on phenylalanine **1a** and determined by <sup>1</sup>H NMR using dibromomethane as internal standard.

### 3.2 Substrates Preparation

Synthesis of *N*-Nosyl amino acid methyl esters **1a-p** according to the reported procedures.<sup>1</sup>

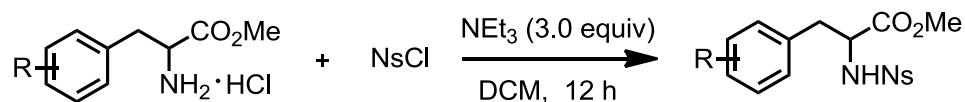

4-Nitrobenzenesulfonyl chloride (NsCl, 1.0 mmol, 1.0 equiv) was added to a cooled (0 °C) solution of amino acid methyl ester hydrochloride (1.0 mmol, 1.0 equiv) and triethylamine (TEA, 3.0 mmol, 3.0 equiv) in DCM (5 mL). After being stirred at room temperature for 12 h, the reaction mixture was poured into H<sub>2</sub>O. The organic layer was separated, dried over anhydrous Na<sub>2</sub>SO<sub>4</sub>, filtered and concentrated under vacuum. The residue was subjected to column chromatography (EtOAc/hexanes = 1:2) to give **1a-p**.

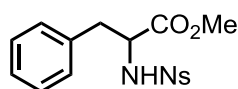

#### methyl 2-(4-nitrophenylsulfonamido)-3-phenylpropanoate **1a**<sup>1</sup>

<sup>1</sup>H NMR (500 MHz, acetone-*d*<sub>6</sub>) δ 8.26 (d, *J* = 9.0 Hz, 2H), 7.88 (d, *J* = 9.0 Hz, 2H), 7.43 (d, *J* = 9.5

Hz, 1H, N-H), 7.18-7.14 (m, 5H), 4.26 (dt,  $J = 5.5, 9.5$  Hz, 1H), 3.53 (s, 3H), 3.10 (dd,  $J = 5.5, 13.5$  Hz, 1H), 2.91 (dd,  $J = 9.5, 13.5$  Hz, 1H);  $^{13}\text{C}$  NMR (125 MHz, acetone- $d_6$ ) 171.89, 150.67, 147.55, 137.08, 130.17, 129.19, 128.88, 127.61, 124.94, 58.67, 52.50, 39.16.

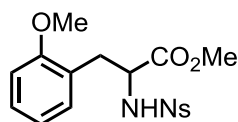

**methyl 3-(2-methoxyphenyl)-2-(4-nitrophenylsulfonamido)propanoate 1b**

$^1\text{H}$  NMR (500 MHz,  $\text{CDCl}_3$ )  $\delta$  8.12 (d,  $J = 9.0$  Hz, 2H), 7.73 (d,  $J = 9.0$  Hz, 2H), 7.16 (dt,  $J = 1.5, 8.0$  Hz, 1H), 6.98 (dd,  $J = 1.5, 7.5$  Hz, 1H), 6.78 (dt,  $J = 1.0, 8.0$  Hz, 1H), 6.69 (dd,  $J = 1.0, 8.0$  Hz, 1H), 5.77 (d,  $J = 8.5$  Hz, 1H, N-H), 4.30-4.25 (m, 1H), 3.75 (s, 3H), 3.65 (s, 3H), 3.05 (dd,  $J = 5.0, 14.0$  Hz, 1H), 2.94 (dd,  $J = 9.5, 14.0$  Hz, 1H);  $^{13}\text{C}$  NMR (125 MHz,  $\text{CDCl}_3$ ) 171.71, 157.19, 149.62, 145.63, 131.25, 128.79, 127.90, 123.85, 123.49, 120.76, 110.36, 56.11, 55.31, 52.52, 33.70. HRMS (ESI-TOF)  $m/z$  Calcd for  $\text{C}_{17}\text{H}_{17}\text{N}_2\text{O}_7\text{S}$   $[\text{M}-\text{H}]^-$ : 393.0762. found: 393.0760.

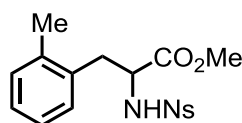

**methyl 2-(4-nitrophenylsulfonamido)-3-(o-tolyl)propanoate 1c**

$^1\text{H}$  NMR (400 MHz,  $\text{CDCl}_3$ )  $\delta$  8.15 (d,  $J = 8.8$  Hz, 2H), 7.74 (d,  $J = 8.8$  Hz, 2H), 7.09 (t,  $J = 7.6$  Hz, 1H), 7.03-6.98 (m, 2H), 6.95 (d,  $J = 7.2$  Hz, 1H), 5.56 (d,  $J = 9.6$  Hz, 1H, N-H), 4.24-4.18 (m, 1H), 3.64 (s, 3H), 3.13 (dd,  $J = 5.6, 14.0$  Hz, 1H), 2.89 (dd,  $J = 9.2, 14.0$  Hz, 1H), 2.24 (s, 3H);  $^{13}\text{C}$  NMR (100 MHz,  $\text{CDCl}_3$ ) 171.68, 149.77, 145.42, 136.38, 133.38, 130.64, 130.16, 128.00, 127.48, 126.13, 124.01, 56.37, 52.77, 36.57, 19.22. HRMS (ESI-TOF)  $m/z$  Calcd for  $\text{C}_{17}\text{H}_{17}\text{N}_2\text{O}_6\text{S}$   $[\text{M}-\text{H}]^-$ : 377.0813. found: 377.0812.

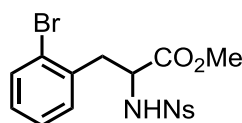

**methyl 3-(2-bromophenyl)-2-(4-nitrophenylsulfonamido)propanoate 1d**

$^1\text{H}$  NMR (400 MHz,  $\text{CDCl}_3$ )  $\delta$  8.13 (d,  $J = 8.8$  Hz, 2H), 7.78 (d,  $J = 8.8$  Hz, 2H), 7.35 (d,  $J = 8.0$  Hz, 1H), 7.14-7.13 (m, 2H), 7.05-7.00 (m, 1H), 5.92 (d,  $J = 9.6$  Hz, 1H, N-H), 4.42-4.36 (m, 1H), 3.69 (s, 3H), 3.25 (dd,  $J = 4.8, 13.6$  Hz, 1H), 2.98 (dd,  $J = 10.0, 14.0$  Hz, 1H);  $^{13}\text{C}$  NMR (100 MHz,  $\text{CDCl}_3$ ) 171.60, 149.71, 145.30, 134.77, 132.89, 131.92, 128.95, 127.99, 127.55, 124.46, 123.98, 55.58, 52.92, 39.00. HRMS (ESI-TOF)  $m/z$  Calcd for  $\text{C}_{16}\text{H}_{14}\text{BrN}_2\text{O}_6\text{S}$  [M-H] $^-$ : 440.9761. found: 440.9764.

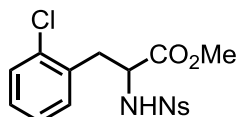

**methyl 3-(2-chlorophenyl)-2-(4-nitrophenylsulfonamido)propanoate 1e**

$^1\text{H}$  NMR (400 MHz,  $\text{CDCl}_3$ )  $\delta$  8.15 (d,  $J = 9.2$  Hz, 2H), 7.79 (d,  $J = 8.8$  Hz, 2H), 7.19-7.09 (m, 4H), 5.65 (br, 1H, N-H), 4.38-4.34 (m, 1H), 3.68 (s, 3H), 3.24 (dd,  $J = 5.2, 13.6$  Hz, 1H), 2.99 (dd,  $J = 9.6, 14.0$  Hz, 1H);  $^{13}\text{C}$  NMR (100 MHz,  $\text{CDCl}_3$ ) 171.52, 149.77, 145.37, 134.09, 133.06, 131.85, 129.59, 128.81, 128.01, 126.95, 124.01, 55.58, 52.90, 36.75. HRMS (ESI-TOF)  $m/z$  Calcd for  $\text{C}_{16}\text{H}_{14}\text{ClN}_2\text{O}_6\text{S}$  [M-H] $^-$ : 397.0267. found: 397.0267.

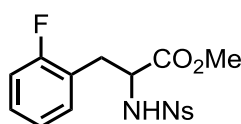

**methyl 3-(2-fluorophenyl)-2-(4-nitrophenylsulfonamido)propanoate 1f**

$^1\text{H}$  NMR (400 MHz,  $\text{CDCl}_3$ )  $\delta$  8.21 (d,  $J = 8.4$  Hz, 2H), 7.85 (d,  $J = 8.8$  Hz, 2H), 7.22-7.17 (m, 1H), 7.11 (t,  $J = 7.6$  Hz, 1H), 7.01 (t,  $J = 7.6$  Hz, 1H), 6.91 (t,  $J = 9.2$  Hz, 1H), 5.48 (br, 1H, N-H), 4.27 (t,  $J = 6.8$  Hz, 1H), 3.64 (s, 3H), 3.11 (dd,  $J = 5.6, 14.0$  Hz, 1H), 3.02 (dd,  $J = 8.0, 14.0$  Hz, 1H);  $^{13}\text{C}$  NMR (100 MHz,  $\text{CDCl}_3$ ) 171.09, 161.09 (d,  $J = 244.3$  Hz), 149.90, 145.52, 131.76 (d,  $J = 4.0$  Hz), 129.38 (d,  $J = 8.1$  Hz), 128.13, 124.30 (d,  $J = 3.6$  Hz), 124.11, 122.02 (d,  $J = 15.4$  Hz), 115.39 (d,  $J = 21.8$  Hz), 55.98, 52.87, 32.86. HRMS (ESI-TOF)  $m/z$  Calcd for  $\text{C}_{16}\text{H}_{14}\text{FN}_2\text{O}_6\text{S}$  [M-H] $^-$ : 381.0562. found: 381.0564.

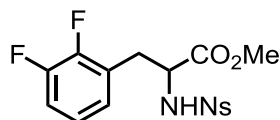

**methyl 3-(2,3-difluorophenyl)-2-(4-nitrophenylsulfonamido)propanoate 1g**

$^1\text{H}$  NMR (500 MHz, acetone- $d_6$ )  $\delta$  8.32 (d,  $J$  = 8.5 Hz, 2H), 7.94 (d,  $J$  = 9.0 Hz, 2H), 7.57 (d,  $J$  = 10.0 Hz, 1H, N-H), 7.15-7.02 (m, 3H), 4.33 (dt,  $J$  = 5.5, 9.5 Hz, 1H), 3.56 (s, 3H), 3.23 (dd,  $J$  = 5.0, 14.0 Hz, 1H), 3.00 (dd,  $J$  = 9.5, 14.0 Hz, 1H);  $^{13}\text{C}$  NMR (125 MHz, acetone- $d_6$ ) 171.47, 151.39 (dd,  $J$  = 12.8, 244.3 Hz), 151.26, 150.34 (dd,  $J$  = 13.0, 244.5 Hz), 148.02, 129.37, 128.35 (t,  $J$  = 3.2 Hz), 127.31 (d,  $J$  = 11.6 Hz), 125.78 (dd,  $J$  = 4.7, 6.7 Hz), 125.47, 117.39 (d,  $J$  = 17.1 Hz), 57.54, 53.20, 33.09. HRMS (ESI-TOF)  $m/z$  Calcd for  $\text{C}_{16}\text{H}_{13}\text{F}_2\text{N}_2\text{O}_6\text{S}$  [M-H] $^-$ : 399.0468. found: 399.0468.

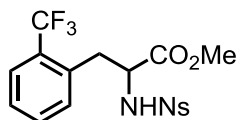

**methyl 2-(4-nitrophenylsulfonamido)-3-(2-(trifluoromethyl)phenyl)propanoate 1h**

$^1\text{H}$  NMR (500 MHz,  $\text{CDCl}_3$ )  $\delta$  8.24 (d,  $J$  = 8.5 Hz, 2H), 7.87 (d,  $J$  = 9.0 Hz, 2H), 7.48 (d,  $J$  = 8.0 Hz, 1H), 7.37 (t,  $J$  = 8.0 Hz, 1H), 7.31 (d,  $J$  = 8.0 Hz, 1H), 7.27 (d,  $J$  = 10.0 Hz, 1H), 5.49 (d,  $J$  = 9.0 Hz, 1H, N-H), 4.29-4.25 (m, 1H), 3.64 (s, 3H), 3.19 (dd,  $J$  = 5.5, 14.0 Hz, 1H), 3.05 (dd,  $J$  = 7.0, 14.0 Hz, 1H);  $^{13}\text{C}$  NMR (125 MHz,  $\text{CDCl}_3$ ) 170.75, 150.03, 145.32, 135.93, 132.85, 130.98 (q,  $J$  = 32.2 Hz), 129.18, 128.16, 126.02 (q,  $J$  = 4.0 Hz), 124.26 (q,  $J$  = 4.0 Hz), 124.21, 123.76 (q,  $J$  = 270.7 Hz), 56.87, 52.91, 39.00. HRMS (ESI-TOF)  $m/z$  Calcd for  $\text{C}_{17}\text{H}_{14}\text{F}_3\text{N}_2\text{O}_6\text{S}$  [M-H] $^-$ : 431.0530. found: 431.0530.

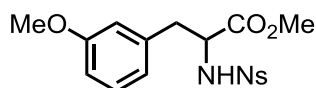

**methyl 3-(3-methoxyphenyl)-2-(4-nitrophenylsulfonamido)propanoate 1i**

$^1\text{H}$  NMR (500 MHz,  $\text{CDCl}_3$ )  $\delta$  8.18 (d,  $J$  = 9.0 Hz, 2H), 7.80 (d,  $J$  = 9.0 Hz, 2H), 7.11 (t,  $J$  = 8.0 Hz, 1H), 6.71 (dd,  $J$  = 2.0, 8.0 Hz, 1H), 6.63 (d,  $J$  = 7.5 Hz, 1H), 6.51 (s, 1H), 5.62 (d,  $J$  = 9.0 Hz, 1H, N-H), 4.25-4.23 (m, 1H), 3.70 (s, 3H), 3.66 (s, 3H), 3.08 (dd,  $J$  = 5.0, 14.0 Hz, 1H), 2.88 (dd,  $J$  = 8.5, 14.0 Hz, 1H);  $^{13}\text{C}$  NMR (125 MHz,  $\text{CDCl}_3$ ) 171.24, 159.60, 149.75, 145.46, 136.41, 129.67, 128.04, 123.99, 121.51, 115.04, 112.35, 57.11, 55.01, 52.75, 38.96. HRMS (ESI-TOF)  $m/z$  Calcd

for  $C_{17}H_{17}N_2O_7S$   $[M-H]^-$ : 393.0762. found: 393.0761.

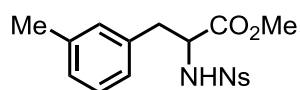

**methyl 2-(4-nitrophenylsulfonamido)-3-(m-tolyl)propanoate 1j**

$^1H$  NMR (400 MHz,  $CDCl_3$ )  $\delta$  8.18 (d,  $J = 8.8$  Hz, 2H), 7.80 (d,  $J = 8.8$  Hz, 2H), 7.08 (t,  $J = 7.6$  Hz, 1H), 7.00 (d,  $J = 7.6$  Hz, 1H), 6.84 (d,  $J = 8.0$  Hz, 1H), 6.82 (s, 1H), 5.55 (d,  $J = 9.6$  Hz, 1H, N-H), 4.26-4.21 (m, 1H), 3.64 (s, 3H), 3.07 (dd,  $J = 5.2, 14.0$  Hz, 1H), 2.90 (dd,  $J = 8.0, 14.0$  Hz, 1H), 2.23 (s, 3H);  $^{13}C$  NMR (100 MHz,  $CDCl_3$ ) 171.26, 149.77, 145.51, 138.30, 134.77, 129.94, 128.57, 128.09, 128.03, 126.24, 123.98, 57.19, 52.67, 38.95, 21.19. HRMS (ESI-TOF)  $m/z$  Calcd for  $C_{17}H_{17}N_2O_6S$   $[M-H]^-$ : 377.0813. found: 377.0815.

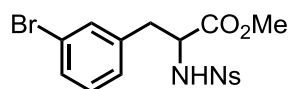

**methyl 3-(3-bromophenyl)-2-(4-nitrophenylsulfonamido)propanoate 1k**

$^1H$  NMR (500 MHz,  $CDCl_3$ )  $\delta$  8.24 (d,  $J = 8.5$  Hz, 2H), 7.84 (d,  $J = 8.5$  Hz, 2H), 7.32 (dd,  $J = 2.0, 8.0$  Hz, 1H), 7.13 (s, 1H), 7.09 (t,  $J = 8.0$  Hz, 1H), 7.02 (d,  $J = 7.5$  Hz, 1H), 5.46 (d,  $J = 9.0$  Hz, 1H, N-H), 4.26-4.21 (m, 1H), 3.67 (s, 3H), 3.09 (dd,  $J = 5.0, 14.0$  Hz, 1H), 2.90 (dd,  $J = 8.0, 14.0$  Hz, 1H);  $^{13}C$  NMR (125 MHz,  $CDCl_3$ ) 170.88, 149.99, 145.34, 137.24, 132.27, 130.50, 130.22, 128.09, 127.99, 124.20, 122.68, 56.98, 52.94, 38.75. HRMS (ESI-TOF)  $m/z$  Calcd for  $C_{16}H_{14}BrN_2O_6S$   $[M-H]^-$ : 440.9761. found: 440.9758.

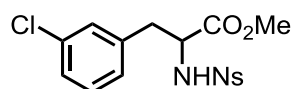

**methyl 3-(3-chlorophenyl)-2-(4-nitrophenylsulfonamido)propanoate 1l**

$^1H$  NMR (400 MHz,  $CDCl_3$ )  $\delta$  8.22 (d,  $J = 8.8$  Hz, 2H), 7.83 (d,  $J = 8.8$  Hz, 2H), 7.14-7.13 (m, 2H), 6.99-6.97 (m, 2H), 5.85 (br, 1H, N-H), 4.24 (br, 1H), 3.67 (s, 3H), 3.10 (dd,  $J = 4.8, 14.0$  Hz, 1H), 2.89 (dd,  $J = 8.0, 14.0$  Hz, 1H);  $^{13}C$  NMR (100 MHz,  $CDCl_3$ ) 171.05, 149.83, 145.31, 137.09, 134.27, 129.87, 129.22, 127.97, 127.52, 127.39, 124.09, 57.01, 52.85, 38.51. HRMS (ESI-TOF)  $m/z$  Calcd for  $C_{16}H_{14}ClN_2O_6S$   $[M-H]^-$ : 397.0267. found: 397.0269.

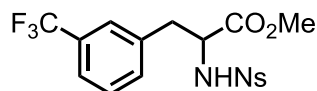

**methyl 2-((4-nitrophenyl)sulfonamido)-3-(3-(trifluoromethyl)phenyl)propanoate 1m**

$^1\text{H}$  NMR (500 MHz,  $\text{CDCl}_3$ )  $\delta$  8.24 (d,  $J = 8.5$  Hz, 2H), 7.87 (d,  $J = 8.5$  Hz, 2H), 7.49 (d,  $J = 8.0$  Hz, 1H), 7.37 (t,  $J = 8.0$  Hz, 1H), 7.32 (d,  $J = 8.0$  Hz, 1H), 7.28 (s, 1H), 5.50 (d,  $J = 9.0$  Hz, 1H, N-H), 4.29-4.25 (m, 1H), 3.64 (s, 3H), 3.19 (dd,  $J = 5.2, 14.0$  Hz, 1H), 3.06 (dd,  $J = 7.5, 14.0$  Hz, 1H);  $^{13}\text{C}$  NMR (125 MHz,  $\text{CDCl}_3$ )  $\delta$  170.69, 150.03, 145.27, 135.85, 132.87, 130.99 (q,  $J = 32.1$  Hz), 129.19, 128.18, 126.03 (q,  $J = 3.6$  Hz), 124.31 (q,  $J = 3.6$  Hz), 124.24, 123.76 (q,  $J = 270.7$  Hz), 55.81, 52.94, 39.04. . HRMS (ESI-TOF)  $m/z$  Calcd for  $\text{C}_{17}\text{H}_{14}\text{F}_3\text{N}_2\text{O}_6\text{S}$  [M-H] $^-$ : 431.0530 found: 431.0530.

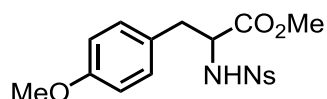

**methyl 3-(4-methoxyphenyl)-2-(4-nitrophenylsulfonamido)propanoate 1n<sup>2</sup>**

$^1\text{H}$  NMR (500 MHz,  $\text{CDCl}_3$ )  $\delta$  8.21 (d,  $J = 8.5$  Hz, 2H), 7.84 (d,  $J = 8.5$  Hz, 2H), 6.95 (d,  $J = 9.0$  Hz, 2H), 6.71 (d,  $J = 8.5$  Hz, 2H), 5.42 (d,  $J = 9.5$  Hz, 1H, N-H), 4.24-4.19 (m, 1H), 3.75 (s, 3H), 3.63 (s, 3H), 3.06 (dd,  $J = 5.0, 14.0$  Hz, 1H), 2.90 (dd,  $J = 7.5, 14.0$  Hz, 1H);  $^{13}\text{C}$  NMR (125 MHz,  $\text{CDCl}_3$ )  $\delta$  171.19, 158.92, 149.83, 145.63, 130.31, 128.20, 126.60, 124.05, 114.03, 57.27, 55.13, 52.70, 38.34.

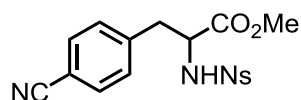

**methyl 3-(4-cyanophenyl)-2-(4-nitrophenylsulfonamido)propanoate 1o**

$^1\text{H}$  NMR (400 MHz,  $\text{acetone-}d_6$ )  $\delta$  8.32 (d,  $J = 9.2$  Hz, 2H), 7.93 (d,  $J = 8.8$  Hz, 2H), 7.60 (d,  $J = 8.0$  Hz, 2H), 7.52 (d,  $J = 9.2$  Hz, 1H, N-H), 7.42 (d,  $J = 8.4$  Hz, 2H), 4.39-4.33 (m, 1H), 3.54 (s, 3H), 3.23 (dd,  $J = 5.2, 13.6$  Hz, 1H), 3.03 (dd,  $J = 9.2, 13.6$  Hz, 1H);  $^{13}\text{C}$  NMR (100 MHz,  $\text{acetone-}d_6$ )  $\delta$  171.57, 151.85, 147.60, 143.03, 132.97, 131.47, 129.09, 125.07, 119.16, 111.64, 58.15, 53.76, 39.10. HRMS (ESI-TOF)  $m/z$  Calcd for  $\text{C}_{17}\text{H}_{14}\text{N}_3\text{O}_6\text{S}$  [M-H] $^-$ : 388.0609. found: 388.0610.

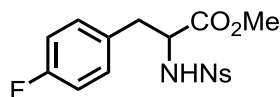

**methyl 3-(4-fluorophenyl)-2-(4-nitrophenylsulfonamido)propanoate 1p**

$^1\text{H}$  NMR (500 MHz,  $\text{CDCl}_3$ )  $\delta$  8.24 (d,  $J = 9.0$  Hz, 2H), 7.88 (d,  $J = 8.5$  Hz, 2H), 7.06-7.03 (m, 2H), 6.88 (t,  $J = 7.5$  Hz, 2H), 5.84 (d,  $J = 9.0$  Hz, 1H, N-H), 4.26-4.22 (m, 1H), 3.61 (s, 3H), 3.10 (dd,  $J = 5.5, 14.0$  Hz, 1H), 2.96 (dd,  $J = 7.5, 14.0$  Hz, 1H);  $^{13}\text{C}$  NMR (125 MHz,  $\text{CDCl}_3$ ) 171.01, 161.93 (d,  $J = 244.5$  Hz), 149.82, 145.44, 130.81 (d,  $J = 8.1$  Hz), 130.62 (d,  $J = 3.5$  Hz), 128.10, 124.05, 115.36 (d,  $J = 21.0$  Hz), 57.07, 52.65, 38.11. HRMS (ESI-TOF)  $m/z$  Calcd for  $\text{C}_{16}\text{H}_{14}\text{FN}_2\text{O}_6\text{S}$   $[\text{M}-\text{H}]^-$ : 381.0562. found: 381.0560.

**Synthesis of *N*-Nosyl 2-amino-3-phenylpropan-1-ol 1q.**

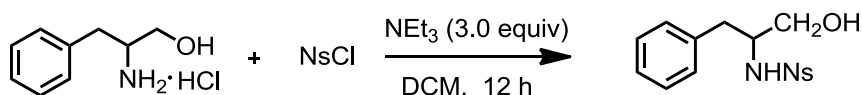

4-Nitrobenzenesulfonyl chloride (NsCl, 1.0 mmol, 1.0 equiv) was added to a cooled ( $0^\circ\text{C}$ ) solution of 2-amino-3-phenylpropan-1-ol hydrochloride (1.0 mmol, 1.0 equiv) and triethylamine (TEA, 3.0 mmol, 3.0 equiv) in DCM (5 mL). After being stirred at room temperature for 12 h, the reaction mixture was poured into  $\text{H}_2\text{O}$ . The organic layer was separated, dried over anhydrous  $\text{Na}_2\text{SO}_4$ , filtered and concentrated under vacuum. The residue was subjected to column chromatography (EtOAc/hexanes = 1:1) to give **1q**.

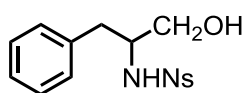

***N*-(1-hydroxy-3-phenylpropan-2-yl)-4-nitrobenzenesulfonamide 1q<sup>3</sup>**

$^1\text{H}$  NMR (400 MHz, Acetone- $d_6$ )  $\delta$  8.19 (d,  $J = 8.8$  Hz, 2H), 7.84 (d,  $J = 8.8$  Hz, 2H), 7.09-7.08 (m, 5H), 6.85 (d,  $J = 7.6$  Hz, 1H, N-H), 4.03 (t,  $J = 5.2$  Hz, 1H), 3.63-3.51 (m, 3H), 2.97 (dd,  $J = 5.2, 14.0$  Hz, 1H), 2.66 (dd,  $J = 8.0, 14.0$  Hz, 1H);  $^{13}\text{C}$  NMR (100 MHz, Acetone- $d_6$ )  $\delta$  150.40, 148.20, 139.12, 130.146, 129.00, 128.691, 126.88, 124.87, 65.08, 58.93, 38.38.

**Synthesis of *N*-Nosyl 2-amino-3-phenylpropyl acetate 1r.**

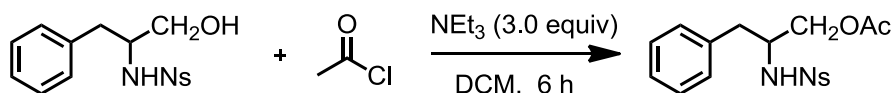



Acetyl chloride (AcCl, 0.5mmol, 1.0 equiv) was added to a cooled (0° C) solution of **1q** (0.5 mmol, 1.0 equiv) and triethylamine (TEA, 3.0 mmol, 3.0 equiv) in DCM (2.5 mL). After being stirred at room temperature for 6 h, the reaction mixture was poured into H<sub>2</sub>O. The organic layer was separated, dried over anhydrous Na<sub>2</sub>SO<sub>4</sub>, filtered and concentrated under vacuum. The residue was subjected to column chromatography (EtOAc/hexanes = 1:2) to give **1r**.

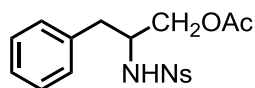

### 2-(4-nitrophenylsulfonamido)-3-phenylpropyl acetate **1r**

<sup>1</sup>H NMR (500 MHz, CDCl<sub>3</sub>) δ 8.13 (d, *J* = 8.5 Hz, 2H), 7.75 (d, *J* = 8.5 Hz, 2H), 7.30-7.11 (m, 3H), 6.98 (d, *J* = 6.0 Hz, 2H), 5.38 (d, *J* = 8.5 Hz, 1H, N-H), 4.15-4.08 (m, 2H), 3.78-3.76 (m, 1H), 2.85 (dd, *J* = 6.0, 14.0 Hz, 1H), 2.67 (dd, *J* = 8.5, 14.0 Hz, 1H), 2.05 (s, 3H); <sup>13</sup>C NMR (125 MHz, CDCl<sub>3</sub>) 171.85, 149.63, 145.99, 136.06, 129.07, 128.64, 127.80, 126.92, 124.09, 65.67, 54.84, 38.29, 22.72. HRMS (ESI-TOF) *m/z* Calcd for C<sub>17</sub>H<sub>17</sub>N<sub>2</sub>O<sub>6</sub>S [M-H]<sup>-</sup>: 377.0813. found: 377.0811.

### Synthesis of N-Nosyl 1-phenylpropan-2-amine **1s** and N-Nosyl 1-(2-methoxyphenyl)propan-2-amine **1t**.<sup>4</sup>

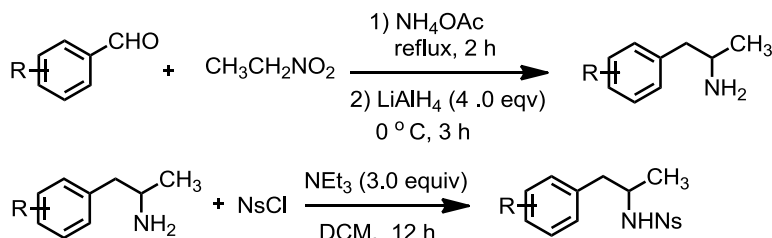

A solution of the corresponding arylaldehyde (~0.2 M) in nitroethane and ammonium acetate (0.85 equiv) was refluxed for 2 h, then concentrated under vacuum. The crude oil was diluted with THF and slowly added to an ice-cold solution of LiAlH<sub>4</sub> (4 equiv, ~0.5 M) in THF. After the addition, the solution was refluxed for 3 h and allowed to cool to room temperature. H<sub>2</sub>O (1.3 g/g LiAlH<sub>4</sub>) was slowly added under vigorous stirring, followed by 15% aqueous NaOH (1.3 g/g LiAlH<sub>4</sub>), followed again by H<sub>2</sub>O (3.25 g/g LiAlH<sub>4</sub>). After stirring vigorously for 10 minutes the white precipitate was collected on a filter. The white solid was washed with diethyl ether and the combined filtrates dried and concentrated to yield the 1-(aryl)propan-2-amine. The amines were immediately used in the following step.

4-Nitrobenzenesulfonyl chloride (NsCl, 1.0 mmol, 1.0 equiv) was added to a cooled (0°C) solution of 1-(aryl)propan-2-amine (1.0 mmol, 1.0 equiv) and triethylamine (TEA, 3.0 mmol, 3.0 equiv) in DCM (5 mL). After being stirred at room temperature for 12 h, the reaction mixture was poured

into H<sub>2</sub>O. The organic layer was separated, dried over anhydrous Na<sub>2</sub>SO<sub>4</sub>, filtered and concentrated under vacuum. The residue was subjected to column chromatography (EtOAc/hexanes =1:2) to give **1s** and **1t**.

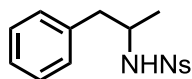

#### 4-nitro-N-(1-phenylpropan-2-yl)benzenesulfonamide **1s**<sup>4</sup>

<sup>1</sup>H NMR (500 MHz, CDCl<sub>3</sub>) δ 8.16 (d, *J* = 9.0 Hz, 2H), 7.76 (d, *J* = 9.0 Hz, 2H), 7.16-7.14 (m, 3H), 6.97 (dd, *J* = 2.0, 7.5 Hz, 2H), 4.79 (d, *J* = 8.0 Hz, 1H, N-H), 3.59-3.54 (m, 1H), 2.75 (dd, *J* = 5.5, 14.0 Hz, 1H), 2.60 (dd, *J* = 8.0, 14.0 Hz, 1H), 1.24 (d, *J* = 5.5 Hz, 3H); <sup>13</sup>C NMR (125 MHz, CDCl<sub>3</sub>) δ 149.63, 146.23, 130.90, 129.12, 128.57, 127.88, 126.80, 124.09, 51.99, 43.36, 22.37.

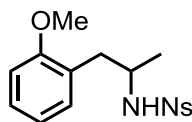

#### N-(1-(2-methoxyphenyl)propan-2-yl)-4-nitrobenzenesulfonamide **1t**

<sup>1</sup>H NMR (500 MHz, CDCl<sub>3</sub>) δ 8.03 (d, *J* = 8.5 Hz, 2H), 7.60 (d, *J* = 9.0 Hz, 2H), 7.11 (t, *J* = 8.0 Hz, 1H), 6.82 (d, *J* = 7.5 Hz, 1H), 6.70 (t, *J* = 7.5 Hz, 1H), 6.67 (d, *J* = 8.5 Hz, 1H), 5.22 (br, 1H, N-H), 3.76 (s, 3H), 3.48-3.43 (m, 1H), 2.71 (dd, *J* = 10.0, 14.0 Hz, 1H), 2.57 (dd, *J* = 4.0, 14.0 Hz, 1H), 1.35 (d, *J* = 6.0 Hz, 3H); <sup>13</sup>C NMR (125 MHz, CDCl<sub>3</sub>) δ 156.82, 149.40, 145.78, 130.97, 128.31, 127.64, 125.86, 123.80, 121.09, 110.59, 55.49, 52.19, 37.30, 23.59. HRMS (ESI-TOF) *m/z* Calcd for C<sub>16</sub>H<sub>17</sub>N<sub>2</sub>O<sub>5</sub>S [M-H]<sup>-</sup>: 349.0864. found: 349.0868.

#### Synthesis of substrate 2-aryl N-nosylaniline **4a-c**<sup>5-6</sup>

4-Nitrobenzenesulfonyl chloride (NsCl, 1.0 mmol, 1.0 equiv) was added to a solution of 2-aryl aniline (1.0 mmol, 1.0 equiv) in pyridine (5 mL). After being stirred at 140 °C for 0.5 h, the reaction mixture was cooled to room temperature and poured into H<sub>2</sub>O. The organic layer was separated, dried over anhydrous Na<sub>2</sub>SO<sub>4</sub>, filtered and concentrated under vacuum. The residue was purified using ethyl acetate/hexanes (1:2) as the eluent to give the substrates **4a-c**.<sup>5-6</sup>

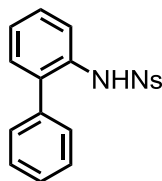

#### N-([1,1'-biphenyl]-2-yl)-4-nitrobenzenesulfonamide 4a<sup>5</sup>

This compound was prepared according to the procedure in reference 5.

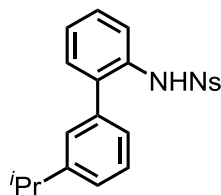

#### N-(3'-isopropyl-[1,1'-biphenyl]-2-yl)-4-nitrobenzenesulfonamide 4b

<sup>1</sup>H NMR (400 MHz, CDCl<sub>3</sub>) δ 8.18 (d, *J* = 8.8 Hz, 2H), 7.69 (d, *J* = 9.2 Hz, 2H), 7.36 (t, *J* = 8.4 Hz, 1H), 7.25-7.19 (m, 3H), 7.14 (d, *J* = 7.2 Hz, 1H), 6.89 (s, 1H), 6.78 (s, 1H), 6.64-6.62 (m, 1H), 2.87-2.80 (m, 1H), 1.24 (d, *J* = 6.8 Hz, 6H); <sup>13</sup>C NMR (125 MHz, CDCl<sub>3</sub>) δ 150.08, 150.03, 144.63, 136.78, 134.88, 132.40, 130.52, 129.16, 128.70, 128.26, 126.72, 126.28, 125.96, 125.93, 124.01, 122.13, 33.99, 23.86. HRMS (ESI-TOF) *m/z* Calcd for C<sub>21</sub>H<sub>19</sub>N<sub>2</sub>O<sub>4</sub>S [M-H]<sup>-</sup>: 395.1071. found: 395.1069.

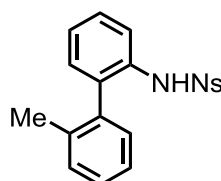

#### N-(3'-methyl-[1,1'-biphenyl]-2-yl)-4-nitrobenzenesulfonamide 4c

<sup>1</sup>H NMR (500 MHz, CDCl<sub>3</sub>) δ 8.23 (d, *J* = 8.5 Hz, 2H), 7.75 (d, *J* = 8.5 Hz, 2H), 7.73 (d, *J* = 8.5 Hz, 1H), 7.36 (dt, *J* = 1.5, 8.0 Hz, 1H), 7.30 (dt, *J* = 1.5, 7.5 Hz, 1H), 7.25 (d, *J* = 8.5 Hz, 1H), 7.18 (dt, *J* = 1.0, 7.5 Hz, 1H), 7.11 (dt, *J* = 1.0, 7.5 Hz, 1H), 7.04 (dd, *J* = 1.5, 8.0 Hz, 1H), 6.51 (dd, *J* = 1.0, 7.5 Hz, 1H), 6.40 (s, 1H), 1.84 (s, 3H); <sup>13</sup>C NMR (125 MHz, CDCl<sub>3</sub>) δ 150.20, 144.79, 136.36, 135.67, 133.07, 132.89, 130.85, 130.34, 129.18, 128.89, 128.79, 128.44, 126.41, 125.48, 124.13, 120.77, 19.46. HRMS (ESI-TOF) *m/z* Calcd for C<sub>19</sub>H<sub>15</sub>N<sub>2</sub>O<sub>4</sub>S [M-H]<sup>-</sup>: 367.0758. found: 367.0759.

Synthesis *N*-nosyl-dipeptides according to the reported procedures.<sup>4</sup>

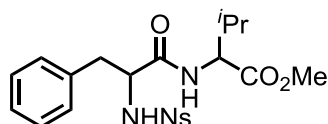

**methyl 3-methyl-2-(2-(4-nitrophenylsulfonamido)-3-phenylpropanamido)butanoate 6a**

$^1\text{H}$  NMR (500 MHz,  $\text{CDCl}_3$ )  $\delta$  8.15 (d,  $J = 9.0$  Hz, 2H), 7.75 (d,  $J = 9.0$  Hz, 2H), 7.19-7.14 (m, 3H), 7.01 (d,  $J = 7.5$  Hz, 2H), 6.53 (d,  $J = 8.5$  Hz, 1H, N-H), 5.63 (d,  $J = 7.5$  Hz, 1H, N-H), 4.38 (q,  $J = 4.5$  Hz, 1H), 4.01-3.97 (m, 1H), 3.73 (s, 3H), 3.12 (dd,  $J = 5.5, 14.0$  Hz, 1H), 2.89 (dd,  $J = 8.5, 14.0$  Hz, 1H), 2.10-2.04 (m, 1H), 0.81 (q,  $J = 7.0$  Hz, 6H);  $^{13}\text{C}$  NMR (125 MHz,  $\text{CDCl}_3$ )  $\delta$  171.89, 169.55, 149.93, 144.59, 135.33, 129.03, 128.97, 128.23, 127.42, 124.20, 58.65, 57.28, 39.23, 31.17, 18.73, 17.45. HRMS (ESI-TOF)  $m/z$  Calcd for  $\text{C}_{21}\text{H}_{24}\text{N}_3\text{O}_7\text{S}$   $[\text{M}-\text{H}]^-$ : 462.1340. found: 462.1341.

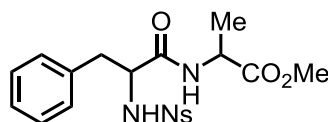

**methyl 2-(2-(4-nitrophenylsulfonamido)-3-phenylpropanamido)propanoate 6b<sup>4</sup>**

$^1\text{H}$  NMR (500 MHz,  $\text{CDCl}_3$ )  $\delta$  8.14 (d,  $J = 9.0$  Hz, 2H), 7.77 (d,  $J = 8.5$  Hz, 2H), 7.18-7.11 (m, 3H), 7.02 (d,  $J = 7.5$  Hz, 2H), 6.74 (br, 1H, N-H), 6.05 (br, 1H, N-H), 4.48-4.43 (m, 1H), 4.05-4.03 (m, 1H), 3.73 (s, 3H), 3.08 (dd,  $J = 5.5, 14.5$  Hz, 1H), 2.94-2.89 (m, 1H), 1.32 (d,  $J = 7.0$  Hz, 3H);  $^{13}\text{C}$  NMR (125 MHz,  $\text{CDCl}_3$ )  $\delta$  172.65, 169.67, 149.85, 145.12, 135.34, 129.19, 128.75, 128.11, 127.26, 124.15, 58.41, 52.62, 48.38, 38.88, 18.10.

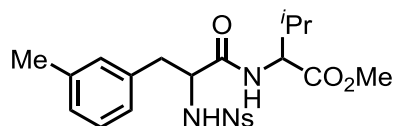

**methyl 3-methyl-2-(2-(4-nitrophenylsulfonamido)-3-(m-tolyl)propanamido)butanoate 6c**

$^1\text{H}$  NMR (500 MHz,  $\text{CDCl}_3$ )  $\delta$  8.11 (d,  $J = 9.6$  Hz, 2H), 7.76 (d,  $J = 9.6$  Hz, 2H), 7.02 (t,  $J = 7.5$  Hz, 1H), 6.94 (d,  $J = 7.5$  Hz, 1H), 6.85 (d,  $J = 7.5$  Hz, 1H), 6.82 (s, 1H), 6.81 (d,  $J = 7.5$  Hz, 1H, N-H), 6.25 (br, 1H, N-H), 4.42 (dd,  $J = 5.0, 9.0$  Hz, 1H), 4.07 (dd,  $J = 6.0, 9.0$  Hz, 1H), 3.72 (s, 3H), 3.10 (dd,  $J = 6.0, 14.0$  Hz, 1H), 2.85 (dd,  $J = 9.0, 14.0$  Hz, 1H), 2.16 (s, 3H), 2.11-2.08 (m, 1H), 0.82 (q,  $J = 7.0$  Hz, 6H);  $^{13}\text{C}$  NMR (125 MHz,  $\text{CDCl}_3$ )  $\delta$  171.94, 170.05, 149.69, 144.80, 138.41, 135.43, 129.76, 128.68, 128.07, 127.87, 126.08, 123.95, 58.80, 57.23, 52.22, 38.91, 31.16, 21.04, 18.64, 17.42. HRMS (ESI-TOF)  $m/z$  Calcd for  $\text{C}_{22}\text{H}_{26}\text{N}_3\text{O}_7\text{S}$   $[\text{M}-\text{H}]^-$ : 476.1497. found: 476.1500.

**Synthesis of methyl 2-(4-nitrophenylsulfonamido)-2-phenylacetate according to the reported procedure.<sup>5</sup>**

Under an nitrogen atmosphere, a round-bottom flask was charged with phenylglycine methyl ester hydrochloric acid salt (0.01 mol), pyridine (1.0 ml) and DCM (20 ml). The mixture was stirred and cooled to 0 °C. Then *p*-nitrobenzenesulfonyl chloride (0.011 mol) in DCM (20 ml) was added into the mixture slowly. The mixture was warmed to room temperature and further stirred for 30 min. The reaction mixture was diluted with DCM and washed with hydrochloric acid (1 M) and water. The organic layer was dried over anhydrous Na<sub>2</sub>SO<sub>4</sub>, filtered and concentrated *in vacuo*. The product was recrystallized from ethyl acetate/hexanes to give white crystals, which was dried under high vacuum.

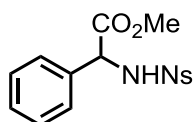

**methyl 2-(4-nitrophenylsulfonamido)-2-phenylacetate 8**

<sup>1</sup>H NMR (400 MHz, CDCl<sub>3</sub>) δ 8.14 (d, *J* = 8.8 Hz, 2H), 7.80 (d, *J* = 8.8 Hz, 2H), 7.27-7.14 (m, 5H), 6.10 (br, 1H, N-H), 5.19 (d, *J* = 6.8 Hz, 1H), 3.65 (s, 3H); <sup>13</sup>C NMR (100 MHz, CDCl<sub>3</sub>) δ 170.09, 149.72, 146.03, 134.46, 128.95, 128.89, 128.19, 127.34, 123.86, 59.52, 53.32. HRMS (ESI-TOF) *m/z* Calcd for C<sub>15</sub>H<sub>13</sub>N<sub>2</sub>O<sub>6</sub>S [M-H]<sup>-</sup>: 349.0500. found: 349.0504.

**3.3 General Procedure for *meta*-C(sp<sup>2</sup>)-H Arylation of Substituted Phenethylamines (Tables 3 and 4).** Substrate **1** (0.10 mmol), Pd(OAc)<sub>2</sub> (0.01 mmol, 2.2 mg), and AgOAc (0.30 mmol, 50.0 mg) were weighed in air and placed in a sealed tube (10 mL) with a magnetic stir bar. To the reaction mixture, 4-acetylpyridine (0.02 mmol, 2.2 μL), norbornene (0.02 mmol, 1.9 mg), aryl halide **2** (0.3 mmol), and TBME (1.0 mL) were added. The reaction mixture was heated to 80 °C for 12 to 24 hours under vigorous stirring. Upon completion, the reaction mixture was cooled to room temperature, diluted with ethyl acetate, and filtered through a pad of celite. The filtrate was concentrated *in vacuo*, and the resulting residue purified by preparative TLC using an eluent of hexanes/ethyl acetate (2/1 to 4/1) to give the desired products **3**.

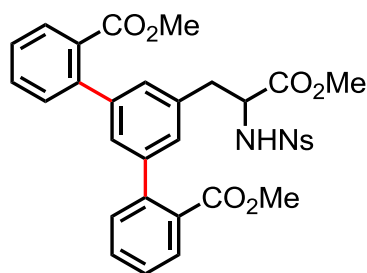

**dimethyl**

**5'-(3-methoxy-2-(4-nitrophenylsulfonamido)-3-oxopropyl)-[1,1':3',1''-terphenyl]-2,2''-dicarboxylate 3aa**

$^1\text{H NMR}$  (500 MHz,  $\text{CDCl}_3$ )  $\delta$  8.22 (d,  $J = 9.0$  Hz, 2H), 7.98 (d,  $J = 9.0$  Hz, 2H), 7.88 (d,  $J = 8.0$  Hz, 2H), 7.51 (t,  $J = 7.5$  Hz, 2H), 7.42 (t,  $J = 8.0$  Hz, 2H), 7.28 (d,  $J = 8.0$  Hz, 2H), 7.12 (s, 1H), 6.98 (s, 2H), 5.80 (d,  $J = 9.0$  Hz, 1H, N-H), 4.42-4.38 (m, 1H), 3.73 (s, 6H), 3.55 (s, 3H), 3.19 (dd,  $J = 6.0, 14.0$  Hz, 1H), 3.12 (dd,  $J = 5.5, 14.0$  Hz, 1H);  $^{13}\text{C NMR}$  (125 MHz,  $\text{CDCl}_3$ )  $\delta$  170.67, 168.45, 149.86, 146.08, 142.02, 141.59, 133.57, 131.49, 130.71, 130.20, 130.16, 128.41, 128.29, 127.66, 127.51, 124.07, 56.89, 52.55, 52.16, 38.90. HRMS (ESI-TOF)  $m/z$  Calcd for  $\text{C}_{32}\text{H}_{27}\text{N}_2\text{O}_{10}\text{S}$   $[\text{M}-\text{H}]^-$ : 631.1392. found: 631.1389.

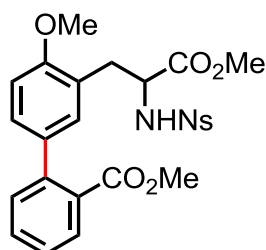

**methyl**

**4'-methoxy-3'-(3-methoxy-2-(4-nitrophenylsulfonamido)-3-oxopropyl)-[1,1'-biphenyl]-2-carboxylate 3ba**

$^1\text{H NMR}$  (500 MHz,  $\text{CDCl}_3$ )  $\delta$  8.16 (d,  $J = 8.5$  Hz, 2H), 7.85-7.83 (m, 3H), 7.51 (dt,  $J = 1.5, 7.5$  Hz, 1H), 7.39 (t,  $J = 7.5$  Hz, 1H), 7.25 (d,  $J = 7.5$  Hz, 1H), 7.15 (dd,  $J = 2.5, 8.5$ , 1H), 6.99 (d,  $J = 2.5$ , 1H), 6.72 (d,  $J = 8.5$ , 1H), 5.72 (d,  $J = 8.0$ , 1H, N-H), 4.33-4.29 (m, 1H), 3.76 (s, 3H), 3.73 (s, 3H), 3.63 (s, 3H), 3.07 (dd,  $J = 5.0, 13.5$  Hz, 1H), 3.00 (dd,  $J = 8.5, 13.5$  Hz, 1H);  $^{13}\text{C NMR}$  (100 MHz,  $\text{CDCl}_3$ )  $\delta$  171.56, 168.62, 156.64, 149.70, 145.79, 141.75, 133.68, 131.77, 131.46, 130.70, 130.06, 128.73, 128.22, 127.06, 123.89, 122.76, 109.99, 55.75, 55.37, 52.49, 52.19, 33.81. HRMS (ESI-TOF)  $m/z$  Calcd for  $\text{C}_{25}\text{H}_{23}\text{N}_2\text{O}_9\text{S}$   $[\text{M}-\text{H}]^-$ : 527.1130. found: 527.1133.

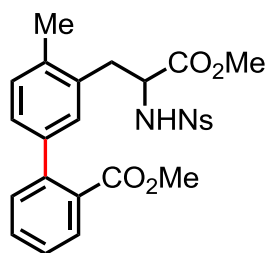

**methyl**

**3'-(3-methoxy-2-(4-nitrophenylsulfonamido)-3-oxopropyl)-4'-methyl-[1,1'-biphenyl]-2-carboxylate 3ca**

$^1\text{H NMR}$  (400 MHz,  $\text{CDCl}_3$ )  $\delta$  8.17 (d,  $J = 8.8$  Hz, 2H), 7.87-7.83 (m, 3H), 7.52 (t,  $J = 7.2$  Hz, 1H), 7.40 (t,  $J = 7.2$  Hz, 1H), 7.25 (d,  $J = 8.0$  Hz, 1H), 7.10-7.04 (m, 2H), 6.99 (s, 1H), 5.60 (br, 1H, N-H), 4.23 (t,  $J = 6.0$  Hz, 1H), 3.75 (s, 3H), 3.62 (s, 3H), 3.17 (dd,  $J = 5.6, 14.0$  Hz, 1H), 2.97 (dd,  $J = 8.8, 14.0$  Hz, 1H), 2.20 (s, 3H);  $^{13}\text{C NMR}$  (100 MHz,  $\text{CDCl}_3$ )  $\delta$  171.52, 168.59, 149.80, 145.51, 142.07, 139.11, 135.39, 132.66, 131.50, 130.72, 130.50, 130.48, 130.07, 130.05, 128.25, 127.56, 127.27, 124.03, 55.97, 52.72, 52.23, 36.42, 18.90. HRMS (ESI-TOF)  $m/z$  Calcd for  $\text{C}_{25}\text{H}_{23}\text{N}_2\text{O}_8\text{S}$   $[\text{M}-\text{H}]^-$ : 511.1181. found: 511.1178.

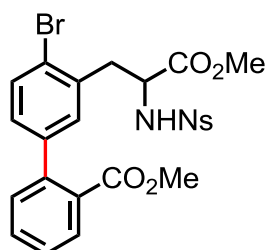

**methyl 4'-bromo-3'-(3-methoxy-2-(4-nitrophenylsulfonamido)-3-oxopropyl)-[1,1'-biphenyl]-2-carboxylate 3da**

$^1\text{H NMR}$  (400 MHz,  $\text{CDCl}_3$ )  $\delta$  8.18 (d,  $J = 8.8$  Hz, 2H), 7.91 (d,  $J = 8.0$  Hz, 1H), 7.87 (d,  $J = 8.8$  Hz, 2H), 7.55 (t,  $J = 7.6$  Hz, 1H), 7.44 (t,  $J = 7.6$  Hz, 1H), 7.38 (d,  $J = 8.0$  Hz, 1H), 7.25 (d,  $J = 8.8$  Hz, 1H), 7.13 (d,  $J = 2.0$  Hz, 1H), 7.02 (dd,  $J = 2.0, 8.0$  Hz, 1H), 5.70 (d,  $J = 9.2$  Hz, 1H, N-H), 4.43-4.36 (m, 1H), 3.77 (s, 3H), 3.66 (s, 3H), 3.26 (dd,  $J = 5.2, 14.0$  Hz, 1H), 3.04 (dd,  $J = 9.6, 14.0$  Hz, 1H);  $^{13}\text{C NMR}$  (100 MHz,  $\text{CDCl}_3$ )  $\delta$  171.34, 168.08, 149.83, 145.40, 141.08, 140.95, 133.99, 132.56, 132.13, 131.78, 130.66, 130.38, 129.72, 129.11, 128.35, 127.83, 124.05, 123.36, 55.30, 52.88, 52.30, 38.91. HRMS (ESI-TOF)  $m/z$  Calcd for  $\text{C}_{24}\text{H}_{20}\text{BrN}_2\text{O}_8\text{S}$   $[\text{M}-\text{H}]^-$ : 575.0129. found: 575.0131.

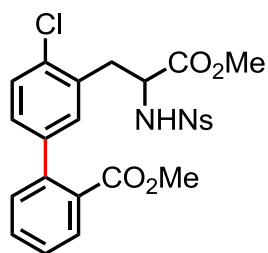

**methyl**

**4'-chloro-3'-((3-methoxy-2-(4-nitrophenylsulfonamido)-3-oxopropyl)-[1,1'-biphenyl]-2-carboxylate 3ea**

$^1\text{H NMR}$  (400 MHz,  $\text{CDCl}_3$ )  $\delta$  8.19 (d,  $J = 8.8$  Hz, 2H), 7.91 (d,  $J = 8.0$  Hz, 1H), 7.88 (d,  $J = 8.8$  Hz, 2H), 7.55 (t,  $J = 6.8$  Hz, 1H), 7.44 (t,  $J = 7.4$  Hz, 1H), 7.25 (d,  $J = 8.0$  Hz, 1H), 7.21 (d,  $J = 8.0$  Hz, 1H), 7.13 (s, 1H), 7.10 (dd,  $J = 2.0, 8.4$  Hz, 1H), 5.72 (br, 1H, N-H), 4.40-4.37 (m, 1H), 3.76 (s, 3H), 3.64 (s, 3H), 3.25 (dd,  $J = 5.6, 14.0$  Hz, 1H), 3.07 (dd,  $J = 8.8, 14.0$  Hz, 1H);  $^{13}\text{C NMR}$  (100 MHz,  $\text{CDCl}_3$ )  $\delta$  171.29, 168.10, 149.84, 145.46, 141.12, 140.29, 133.10, 132.22, 132.12, 131.75, 130.71, 130.36, 129.77, 129.21, 128.89, 128.30, 127.79, 124.04, 55.27, 52.84, 52.28, 36.64. HRMS (ESI-TOF)  $m/z$  Calcd for  $\text{C}_{24}\text{H}_{20}\text{ClN}_2\text{O}_8\text{S}$   $[\text{M-H}]^-$ : 531.0634. found: 531.0630.

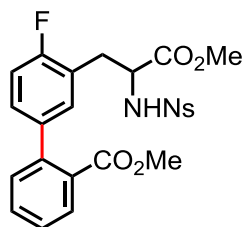

**methyl**

**4'-fluoro-3'-((3-methoxy-2-(4-nitrophenylsulfonamido)-3-oxopropyl)-[1,1'-biphenyl]-2-carboxylate 3fa**

$^1\text{H NMR}$  (400 MHz,  $\text{CDCl}_3$ )  $\delta$  8.22 (d,  $J = 8.8$  Hz, 2H), 7.94-7.90 (m, 3H), 7.54 (t,  $J = 7.2$  Hz, 1H), 7.43 (t,  $J = 7.6$  Hz, 1H), 7.26 (d,  $J = 7.6$  Hz, 1H), 7.16-7.12 (m, 1H), 7.09 (d,  $J = 7.2$  Hz, 1H), 6.93 (t,  $J = 8.8$  Hz, 1H), 5.63 (d,  $J = 9.6$  Hz, 1H, N-H), 4.37-4.32 (m, 1H), 3.76 (s, 3H), 3.61 (s, 3H), 3.16-3.06 (m, 2H);  $^{13}\text{C NMR}$  (100 MHz,  $\text{CDCl}_3$ )  $\delta$  170.88, 168.15, 160.46 (d,  $^1J_{CF} = 245.0$  Hz), 149.90, 145.71, 141.42, 137.49 (d,  $^3J_{CF} = 4.6$  Hz), 132.17 (d,  $^4J_{CF} = 4.3$  Hz), 131.66, 130.81, 130.32, 129.87, 129.32 (d,  $^3J_{CF} = 8.3$  Hz), 128.27, 127.59, 124.11, 121.16 (d,  $^2J_{CF} = 16.1$  Hz), 114.99 (d,  $^2J_{CF} = 22.3$  Hz), 55.73, 52.80, 52.21, 32.82. HRMS (ESI-TOF)  $m/z$  Calcd for  $\text{C}_{24}\text{H}_{20}\text{FN}_2\text{O}_8\text{S}$   $[\text{M-H}]^-$ : 515.0930. found: 515.0934.



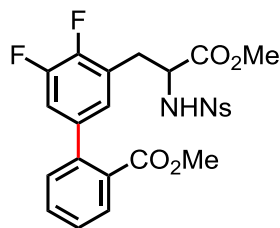

**methyl**

**3',4'-difluoro-5'-(3-methoxy-2-(4-nitrophenylsulfonamido)-3-oxopropyl)-[1,1'-biphenyl]-2-carboxylate 3ga**

$^1\text{H}$  NMR (500 MHz, acetone- $\text{D}_6$ )  $\delta$  8.33 (d,  $J = 9.0$  Hz, 2H), 7.99 (d,  $J = 9.0$  Hz, 2H), 7.85 (dd,  $J = 1.0, 8.0$  Hz, 1H), 7.64 (dt,  $J = 1.5, 7.5$  Hz, 1H), 7.56 (br, 1H, N-H), 7.53 (dt,  $J = 1.5, 7.5$  Hz, 1H), 7.41 (dd,  $J = 1.5, 8.0$  Hz, 1H), 7.12-7.08 (m, 1H), 7.03 (d,  $J = 6.0$  Hz, 1H), 4.40-4.36 (m, 1H), 3.71 (s, 3H), 3.58 (s, 3H), 3.28 (dd,  $J = 5.5, 14.0$  Hz, 1H), 3.04 (dd,  $J = 9.5, 14.0$  Hz, 1H);  $^{13}\text{C}$  NMR (125 MHz, acetone- $\text{D}_6$ )  $\delta$  171.59, 168.80, 150.92, 150.49 (dd,  $J = 12.5, 244$  Hz), 149.23 (dd,  $J = 12.5, 244$  Hz), 147.61, 141.00, 138.92, 132.51, 131.78, 131.74, 130.82, 129.14, 128.92, 128.05, 126.40 (d,  $J = 12.5$  Hz), 125.13, 117.16 (d,  $J = 18.7$  Hz), 56.97, 52.87, 52.53, 32.90. HRMS (ESI-TOF)  $m/z$  Calcd for  $\text{C}_{24}\text{H}_{19}\text{F}_2\text{N}_2\text{O}_8\text{S}$   $[\text{M}-\text{H}]^-$ : 533.0836. found: 533.0839.

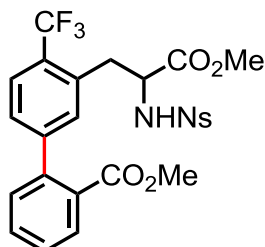

**methyl**

**3'-(3-methoxy-2-(4-nitrophenylsulfonamido)-3-oxopropyl)-4'-(trifluoromethyl)-[1,1'-biphenyl]-2-carboxylate 3ha**

$^1\text{H}$  NMR (500 MHz,  $\text{CDCl}_3$ )  $\delta$  8.20 (d,  $J = 8.5$  Hz, 2H), 7.96 (d,  $J = 7.5$  Hz, 1H), 7.87 (d,  $J = 8.5$  Hz, 2H), 7.60-7.57 (m, 2H), 7.49 (t,  $J = 8.0$  Hz, 1H), 7.30-7.26 (m, 3H), 5.56 (d,  $J = 9.5$  Hz, 1H, N-H), 4.33-4.28 (m, 1H), 3.75 (s, 3H), 3.60 (s, 3H), 3.34 (dd,  $J = 5.5, 14.5$  Hz, 1H), 3.07 (dd,  $J = 9.5, 15.0$  Hz, 1H);  $^{13}\text{C}$  NMR (125 MHz,  $\text{CDCl}_3$ )  $\delta$  171.22, 167.92, 149.92, 145.53, 145.28, 140.99, 133.21, 132.44, 131.90, 130.78, 130.49, 129.76, 128.32, 128.21, 127.76, 127.69, 126.46 (q,  $J = 270$  Hz), 126.15 (q,  $J = 7.2$  Hz), 124.08, 56.62, 52.86, 52.30, 35.84. HRMS (ESI-TOF)  $m/z$  Calcd for  $\text{C}_{25}\text{H}_{20}\text{F}_3\text{N}_2\text{O}_8\text{S}$   $[\text{M}-\text{H}]^-$ : 565.0898. found: 565.0900.

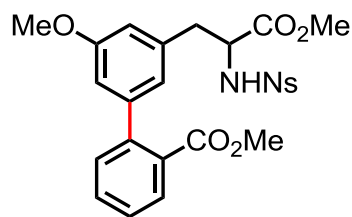

**methyl**

**3'-methoxy-5'-(3-methoxy-2-(4-nitrophenylsulfonamido)-3-oxopropyl)-[1,1'-biphenyl]-2-carboxylate 3ia**

$^1\text{H NMR}$  (500 MHz,  $\text{CDCl}_3$ )  $\delta$  8.21 (d,  $J = 9.0$  Hz, 2H), 7.90 (d,  $J = 8.0$  Hz, 2H), 7.87 (dd,  $J = 1.5$ , 8.0 Hz, 1H), 7.53 (dt,  $J = 1.5$ , 7.5 Hz, 1H), 7.42 (dt,  $J = 1.5$ , 7.6 Hz, 1H), 7.28 (dd,  $J = 1.5$ , 7.5 Hz, 1H), 6.70 (s, 1H), 6.61 (s, 1H), 6.43 (s, 1H), 5.66 (d,  $J = 8.5$  Hz, 1H, N-H), 4.29-4.25 (m, 1H), 3.76 (s, 3H), 3.69 (s, 3H), 3.63 (s, 3H), 3.08 (dd,  $J = 5.0$ , 14.0 Hz, 1H), 2.97 (dd,  $J = 7.5$ , 14.0 Hz, 1H);  $^{13}\text{C NMR}$  (125 MHz,  $\text{CDCl}_3$ )  $\delta$  171.02, 168.42, 159.47, 149.80, 145.60, 142.95, 142.06, 135.61, 131.49, 130.55, 130.13, 130.03, 128.27, 127.51, 124.00, 122.31, 113.46, 112.75, 56.95, 55.10, 52.69, 52.24, 38.83. HRMS (ESI-TOF)  $m/z$  Calcd for  $\text{C}_{25}\text{H}_{23}\text{N}_2\text{O}_9\text{S}$   $[\text{M}-\text{H}]^-$ : 527.1130. found: 527.1131.

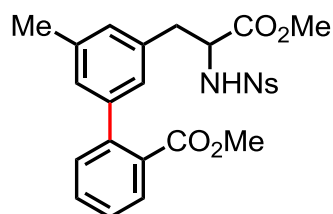

**methyl**

**3'-(3-methoxy-2-(4-nitrophenylsulfonamido)-3-oxopropyl)-5'-methyl-[1,1'-biphenyl]-2-carboxylate 3ja**

$^1\text{H NMR}$  (400 MHz,  $\text{CDCl}_3$ )  $\delta$  8.21 (d,  $J = 8.8$  Hz, 2H), 7.91 (d,  $J = 8.0$  Hz, 2H), 7.88 (d,  $J = 8.8$  Hz, 1H), 7.52 (dt,  $J = 1.2$ , 7.2 Hz, 1H), 7.41 (t,  $J = 7.6$  Hz, 1H), 7.27 (d,  $J = 7.6$  Hz, 1H), 6.99 (s, 1H), 6.83 (s, 1H), 6.76 (s, 1H), 5.63 (d,  $J = 8.8$  Hz, 1H, N-H), 4.32-4.26 (m, 1H), 3.75 (s, 3H), 3.60 (s, 3H), 3.08 (dd,  $J = 5.2$ , 14.0 Hz, 1H), 3.00 (dd,  $J = 7.0$ , 14.0 Hz, 1H), 2.25 (s, 3H);  $^{13}\text{C NMR}$  (100 MHz,  $\text{CDCl}_3$ )  $\delta$  170.98, 168.48, 149.80, 145.74, 142.34, 141.58, 138.17, 134.06, 131.48, 130.67, 130.08, 130.00, 128.55, 128.28, 128.19, 127.33, 126.96, 123.99, 57.01, 52.57, 52.17, 38.80, 21.21. HRMS (ESI-TOF)  $m/z$  Calcd for  $\text{C}_{25}\text{H}_{23}\text{N}_2\text{O}_8\text{S}$   $[\text{M}-\text{H}]^-$ : 511.1181. found: 511.1182.

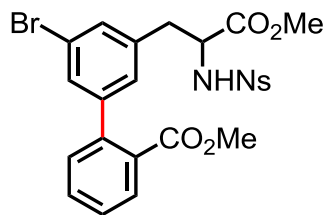

**methyl**

**3'-bromo-5'-(3-methoxy-2-(4-nitrophenylsulfonamido)-3-oxopropyl)-[1,1'-biphenyl]-2-carboxylate 3ka**

$^1\text{H NMR}$  (500 MHz,  $\text{CDCl}_3$ )  $\delta$  8.26 (d,  $J = 9.0$  Hz, 2H), 7.95-7.92 (m, 3H), 7.55 (dt,  $J = 1.5, 8.0$  Hz, 1H), 7.46 (dt,  $J = 1.0, 8.0$  Hz, 1H), 7.31 (s, 1H), 7.25 (d,  $J = 8.0$  Hz, 1H), 7.05 (s, 1H), 7.00 (s, 1H), 5.65 (br, 1H, N-H), 4.30 (br, 1H), 3.79 (s, 3H), 3.63 (s, 3H), 3.09 (dd,  $J = 5.0, 14.0$  Hz, 1H), 3.00 (dd,  $J = 7.0, 14.0$  Hz, 1H);  $^{13}\text{C NMR}$  (125 MHz,  $\text{CDCl}_3$ )  $\delta$  170.68, 167.87, 150.00, 145.57, 143.57, 140.98, 136.22, 131.83, 130.71, 130.57, 130.49, 130.35, 129.62, 128.85, 128.23, 128.01, 124.19, 122.19, 56.87, 52.82, 52.32, 38.58. HRMS (ESI-TOF)  $m/z$  Calcd for  $\text{C}_{24}\text{H}_{20}\text{BrN}_2\text{O}_8\text{S}$   $[\text{M-H}]^-$ : 575.0129. found: 575.0130.

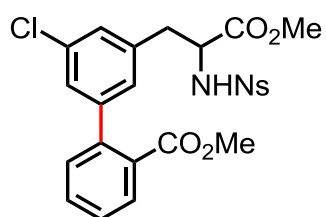

**methyl**

**3'-chloro-5'-(3-methoxy-2-(4-nitrophenylsulfonamido)-3-oxopropyl)-[1,1'-biphenyl]-2-carboxylate 3la**

$^1\text{H NMR}$  (400 MHz,  $\text{CDCl}_3$ )  $\delta$  8.24 (d,  $J = 8.4$  Hz, 2H), 7.94 (d,  $J = 7.6$  Hz, 1H), 7.92 (d,  $J = 8.8$  Hz, 2H), 7.55 (t,  $J = 7.6$  Hz, 1H), 7.45 (t,  $J = 7.8$  Hz, 1H), 7.25 (d,  $J = 7.6$  Hz, 1H), 7.15 (s, 1H), 6.95 (s, 1H), 6.90 (s, 1H), 5.74 (d,  $J = 7.6$  Hz, 1H, N-H), 4.30-4.27 (m, 1H), 3.78 (s, 3H), 3.63 (s, 3H), 3.10 (dd,  $J = 4.8, 14.0$  Hz, 1H), 3.00 (dd,  $J = 7.2, 14.0$  Hz, 1H);  $^{13}\text{C NMR}$  (100 MHz,  $\text{CDCl}_3$ )  $\delta$  170.73, 167.90, 149.94, 145.54, 143.32, 141.02, 136.06, 134.01, 131.79, 130.65, 130.43, 129.66, 128.32, 128.20, 127.96, 127.64, 127.45, 124.14, 56.84, 52.79, 52.28, 38.55. HRMS (ESI-TOF)  $m/z$  Calcd for  $\text{C}_{24}\text{H}_{20}\text{ClN}_2\text{O}_8\text{S}$   $[\text{M-H}]^-$ : 531.0634. found: 531.0624.

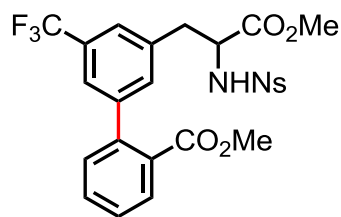

**methyl**

**3'-((3-methoxy-2-((4-(trifluoromethyl)phenyl)sulfonamido)propanoate)-5'-(trifluoromethyl)-[1,1'-biphenyl]-2-carboxylate 3ma**

<sup>1</sup>H NMR (500 MHz, CDCl<sub>3</sub>) δ 8.25 (d, *J* = 9.0 Hz, 2H), 7.99 (d, *J* = 7.5 Hz, 1H), 7.94 (d, *J* = 8.8 Hz, 2H), 7.58 (t, *J* = 8.0 Hz, 1H), 7.48 (t, *J* = 8.0 Hz, 1H), 7.42 (s, 1H), 7.31 (s, 1H), 7.29 (d, *J* = 7.5 Hz, 1H), 7.22 (s, 1H), 5.76 (d, *J* = 9.5 Hz, 1H, N-H), 4.39-4.35 (m, 1H), 3.77 (s, 3H), 3.59 (s, 3H), 3.21-3.14 (m, 2H); <sup>13</sup>C NMR (125 MHz, CDCl<sub>3</sub>) δ 170.48, 167.77, 149.98, 145.66, 145.66, 142.53, 141.13, 135.12, 133.51, 131.99, 130.84, 130.78 (q, *J* = 31.9 Hz), 130.69, 129.54, 128.23, 128.18, 124.50 (q, *J* = 3.8 Hz), 124.36 (q, *J* = 3.8 Hz), 123.74 (q, *J* = 270 Hz), 56.78, 52.74, 52.28, 38.90. HRMS (ESI-TOF) *m/z* Calcd for C<sub>25</sub>H<sub>20</sub>F<sub>3</sub>N<sub>2</sub>O<sub>8</sub>S [M-H]<sup>-</sup>: 565.0898. found: 565.0902.

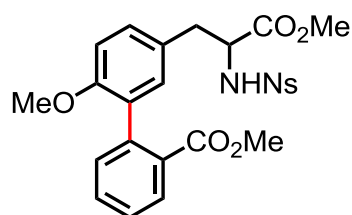

**methyl**

**2'-methoxy-5'-((3-methoxy-2-((4-nitrophenyl)sulfonamido)propanoate)-[1,1'-biphenyl]-2-carboxylate 3na**

<sup>1</sup>H NMR (400 MHz, CDCl<sub>3</sub>) δ 8.24 (d, *J* = 8.8 Hz, 2H), 7.92 (d, *J* = 8.0 Hz, 2H), 7.88 (d, *J* = 8.0 Hz, 1H), 7.53 (dt, *J* = 1.2, 7.0 Hz, 1H), 7.40 (dt, *J* = 1.2, 7.4 Hz, 1H), 7.21 (d, *J* = 7.6 Hz, 1H), 6.96 (d, *J* = 8.4 Hz, 1H), 6.92 (s, 1H), 6.71 (d, *J* = 8.4 Hz, 1H), 5.46 (br, 1H, N-H), 4.28 (m, 1H), 3.71 (s, 3H), 3.67 (s, 3H), 3.60 (s, 3H), 3.11-2.98 (m, 2H); <sup>13</sup>C NMR (100 MHz, CDCl<sub>3</sub>) δ 171.10, 168.22, 155.45, 149.87, 145.73, 138.30, 131.62, 131.24, 131.14, 130.67, 129.44, 129.31, 128.33, 127.37, 126.45, 124.15, 110.35, 57.09, 55.25, 52.65, 51.82, 38.37. HRMS (ESI-TOF) *m/z* Calcd for C<sub>25</sub>H<sub>23</sub>N<sub>2</sub>O<sub>9</sub>S [M-H]<sup>-</sup>: 527.1130. found: 527.1130.

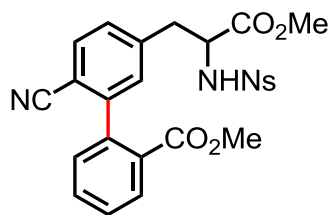

**methyl**

**2'-cyano-5'-(3-methoxy-2-(4-nitrophenylsulfonamido)-3-oxopropyl)-[1,1'-biphenyl]-2-carboxylate 30a**

$^1\text{H NMR}$  (400 MHz,  $\text{CDCl}_3$ )  $\delta$  8.29 (d,  $J = 9.2$  Hz, 2H), 8.14-8.12 (m, 1H), 7.97 (d,  $J = 8.8$  Hz, 2H), 7.65-7.59 (m, 2H), 7.54 (dt,  $J = 1.2, 7.6$  Hz, 1H), 7.28 (dd,  $J = 1.2, 7.6$  Hz, 1H), 7.17-7.14 (m, 2H), 5.71 (br, 1H, N-H), 4.38 (br, 1H), 3.78 (s, 3H), 3.55 (s, 3H), 3.19 (br, 2H);  $^{13}\text{C NMR}$  (100 MHz,  $\text{CDCl}_3$ )  $\delta$  170.20, 166.77, 150.07, 145.69, 139.27, 132.56, 132.35, 130.98, 129.00, 128.44, 128.30, 124.25, 117.58, 111.43, 56.34, 52.83, 52.33, 39.24. HRMS (ESI-TOF)  $m/z$  Calcd for  $\text{C}_{25}\text{H}_{20}\text{N}_3\text{O}_8\text{S}$   $[\text{M-H}]^-$ : 522.0977. found: 522.0980.

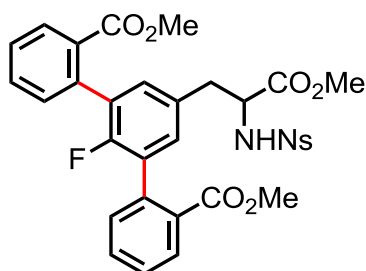

**dimethyl**

**2'-fluoro-5'-(3-methoxy-2-(4-nitrophenylsulfonamido)-3-oxopropyl)-[1,1':3',1''-terphenyl]-2,2''-dicarboxylate 3pa**

$^1\text{H NMR}$  (400 MHz,  $\text{CDCl}_3$ )  $\delta$  8.26 (d,  $J = 8.8$  Hz, 2H), 8.01-7.96 (m, 4H), 7.55 (dt,  $J = 1.2, 7.6$  Hz, 2H), 7.45 (dt,  $J = 1.2, 7.6$  Hz, 2H), 7.27 (dd,  $J = 1.6, 8.8$  Hz, 2H), 6.97 (d,  $J = 6.4$  Hz, 2H), 5.88 (br, 1H, N-H), 4.39 (br, 1H), 3.74 (s, 6H), 3.54 (s, 3H), 3.19-3.08 (m, 2H);  $^{13}\text{C NMR}$  (100 MHz,  $\text{CDCl}_3$ )  $\delta$  170.66, 167.56, 155.31 (d,  $^1J_{\text{CF}} = 244.6$  Hz), 149.92, 146.02, 136.13, 131.78, 131.35, 130.87, 130.45, 130.28, 129.42 (d,  $^3J_{\text{CF}} = 3.9$  Hz), 129.07 (d,  $^2J_{\text{CF}} = 17.4$  Hz), 128.31, 128.09, 124.16, 56.85, 52.58, 52.15, 38.44. HRMS (ESI-TOF)  $m/z$  Calcd for  $\text{C}_{32}\text{H}_{26}\text{FN}_2\text{O}_{10}\text{S}$   $[\text{M-H}]^-$ : 649.1298. found: 649.1293.

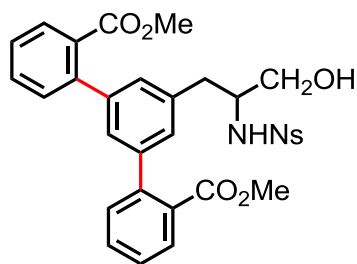

**dimethyl**

**5'-(3-hydroxy-2-(4-nitrophenylsulfonamido)propyl)-[1,1':3',1''-terphenyl]-2,2''-dicarboxylate 3qa(di)**

$^1\text{H}$  NMR (500 MHz,  $\text{CDCl}_3$ )  $\delta$  8.19 (d,  $J = 9.0$  Hz, 2H), 7.97 (d,  $J = 8.5$  Hz, 2H), 7.85 (d,  $J = 8.0$  Hz, 2H), 7.51 (t,  $J = 7.5$  Hz, 2H), 7.42 (t,  $J = 7.5$  Hz, 2H), 7.27 (t,  $J = 8.0$  Hz, 2H), 7.12 (s, 1H), 6.97 (s, 2H), 5.62 (d,  $J = 7.5$  Hz, 1H, N-H), 3.71 (s, 6H), 3.63-3.59 (m, 3H), 2.89-2.87 (m, 2H), 2.43 (br, 1H, OH);  $^{13}\text{C}$  NMR (125 MHz,  $\text{CDCl}_3$ )  $\delta$  168.71, 149.79, 146.49, 141.91, 141.45, 135.48, 131.55, 130.69, 130.22, 130.09, 128.55, 128.26, 127.53, 127.11, 124.21, 63.50, 56.50, 52.20, 37.86. HRMS (ESI-TOF)  $m/z$  Calcd for  $\text{C}_{31}\text{H}_{27}\text{N}_2\text{O}_9\text{S}$  [M-H] $^-$ : 603.1443. found: 603.1445.

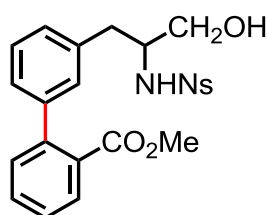

**methyl 3'-(3-hydroxy-2-(4-nitrophenylsulfonamido)propyl)-[1,1'-biphenyl]-2-carboxylate 3qa(mono)**

$^1\text{H}$  NMR (500 MHz,  $\text{CDCl}_3$ )  $\delta$  8.18 (d,  $J = 9.0$  Hz, 2H), 7.88 (d,  $J = 8.5$  Hz, 2H), 7.54 (t,  $J = 7.5$  Hz, 1H), 7.43 (t,  $J = 7.5$  Hz, 2H), 7.27 (d,  $J = 7.5$  Hz, 1H), 7.16-7.12 (m, 2H), 7.00 (s, 1H), 6.91 (d,  $J = 6.5$  Hz, 1H), 5.25 (d,  $J = 7.5$  Hz, 1H, N-H), 3.75 (s, 3H), 3.70-3.54 (m, 3H), 2.89 (dd,  $J = 6.0, 14.0$  Hz, 1H), 2.76 (dd,  $J = 8.0, 14.0$  Hz, 1H), 2.19 (br, 1H, OH);  $^{13}\text{C}$  NMR (125 MHz,  $\text{CDCl}_3$ )  $\delta$  168.59, 149.78, 145.94, 142.23, 141.59, 135.91, 131.64, 130.73, 130.15, 129.99, 129.88, 128.53, 128.26, 127.65, 127.50, 126.95, 124.19, 64.25, 56.88, 52.24, 37.87. HRMS (ESI-TOF)  $m/z$  Calcd for  $\text{C}_{23}\text{H}_{21}\text{N}_2\text{O}_7\text{S}$  [M-H] $^-$ : 469.1075. found: 469.1075.

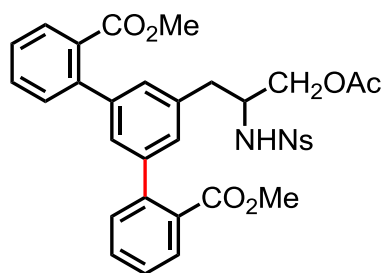

**dimethyl**

**5'-(3-acetoxy-2-(4-nitrophenylsulfonamido)propyl)-[1,1':3',1''-terphenyl]-2,2''-dicarboxylate  
3ra**

$^1\text{H}$  NMR (500 MHz,  $\text{CDCl}_3$ )  $\delta$  8.20 (d,  $J = 8.5$  Hz, 2H), 7.96 (d,  $J = 8.0$  Hz, 2H), 7.87 (d,  $J = 8.0$  Hz, 2H), 7.52 (t,  $J = 7.5$  Hz, 2H), 7.42 (t,  $J = 7.5$  Hz, 2H), 7.27 (d,  $J = 7.5$  Hz, 2H), 7.13 (s, 1H), 6.98 (s, 2H), 5.51 (d,  $J = 8.0$ , 1H, N-H), 4.10-4.03 (m, 2H), 3.91-3.87 (m, 1H), 3.71 (s, 6H), 2.93-2.83 (m, 2H), 1.97 (s, 3H);  $^{13}\text{C}$  NMR (125 MHz,  $\text{CDCl}_3$ )  $\delta$  170.59, 168.50, 149.77, 146.65, 141.89, 141.56, 134.56, 131.51, 130.67, 130.21, 130.12, 128.54, 128.16, 127.53, 127.33, 124.18, 64.86, 53.85, 52.13, 38.10, 20.65. HRMS (ESI-TOF)  $m/z$  Calcd for  $\text{C}_{33}\text{H}_{29}\text{N}_2\text{O}_{10}\text{S}$   $[\text{M}-\text{H}]^-$ : 645. found ESI-MS: 645.

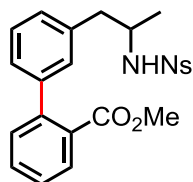

**methyl 3'-(2-(4-nitrophenylsulfonamido)propyl)-[1,1'-biphenyl]-2-carboxylate 3sa (mono) 3sa (mono)**

$^1\text{H}$  NMR (500 MHz,  $\text{CDCl}_3$ )  $\delta$  8.18 (d,  $J = 9.0$  Hz, 2H), 7.89-7.86 (m, 3H), 7.53 (dt,  $J = 1.5, 8.0$  Hz, 1H), 7.43 (dt,  $J = 1.5, 7.5$  Hz, 1H), 7.27 (dd,  $J = 1.5, 7.5$  Hz, 1H), 7.17-7.15 (m, 2H), 6.99 (s, 1H), 6.93-6.91 (m, 1H), 4.91 (d,  $J = 7.5$  Hz, 1H, N-H), 3.73 (s, 3H), 3.61-3.53 (m, 1H), 2.81 (dd,  $J = 5.5, 14.0$  Hz, 1H), 2.65 (dd,  $J = 7.5, 14.0$  Hz, 1H), 1.22 (d,  $J = 6.0$  Hz, 3H);  $^{13}\text{C}$  NMR (125 MHz,  $\text{CDCl}_3$ )  $\delta$  168.50, 149.68, 146.46, 142.30, 141.53, 136.09, 131.55, 130.69, 130.13, 130.08, 129.82, 128.35, 128.14, 127.91, 127.43, 126.87, 124.14, 52.18, 51.48, 43.08, 21.94. HRMS (ESI-TOF)  $m/z$  Calcd for  $\text{C}_{23}\text{H}_{21}\text{N}_2\text{O}_6\text{S}$   $[\text{M}-\text{H}]^-$ : 453.1126. found: 453.1129.

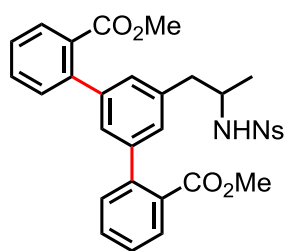

**dimethyl 5'-(2-(4-nitrophenylsulfonamido)propyl)-[1,1':3',1''-terphenyl]-2,2''-dicarboxylate  
3sa(di)**

$^1\text{H NMR}$  (500 MHz,  $\text{CDCl}_3$ )  $\delta$  8.19 (d,  $J = 9.0$  Hz, 2H), 7.97 (d,  $J = 9.0$  Hz, 2H), 7.87 (d,  $J = 8.0$  Hz, 2H), 7.52 (t,  $J = 7.5$  Hz, 2H), 7.42 (t,  $J = 7.5$  Hz, 2H), 7.29 (d,  $J = 7.5$  Hz, 2H), 7.14 (s, 1H), 6.95 (s, 2H), 5.17 (d,  $J = 7.5$ , 1H, N-H), 3.72-3.67 (m, 7H), 2.86 (dd,  $J = 5.5, 13.5$  Hz, 1H), 2.71 (dd,  $J = 6.5, 14.0$  Hz, 1H), 1.18 (d,  $J = 6.5$  Hz, 3H);  $^{13}\text{C NMR}$  (125 MHz,  $\text{CDCl}_3$ )  $\delta$  168.56, 149.71, 146.91, 142.05, 141.39, 135.30, 131.51, 130.70, 130.25, 130.13, 128.72, 128.20, 127.51, 127.06, 124.17, 52.17, 50.99, 42.83, 21.38. HRMS (ESI-TOF)  $m/z$  Calcd for  $\text{C}_{31}\text{H}_{27}\text{N}_2\text{O}_8\text{S}$   $[\text{M}-\text{H}]^-$ : 587.1494. found: 587.1500.

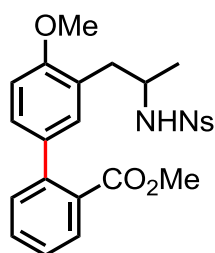

**methyl 4'-methoxy-3'-(2-(4-nitrophenylsulfonamido)propyl)-[1,1'-biphenyl]-2-carboxylate  
3ta**

$^1\text{H NMR}$  (500 MHz,  $\text{CDCl}_3$ )  $\delta$  8.10 (d,  $J = 8.5$  Hz, 2H), 7.83 (d,  $J = 7.5$  Hz, 1H), 7.76 (d,  $J = 8.5$  Hz, 2H), 7.51 (t,  $J = 7.5$  Hz, 1H), 7.38 (t,  $J = 7.5$  Hz, 1H), 7.19 (d,  $J = 7.5$  Hz, 1H), 7.12 (d,  $J = 7.5$ , 1H), 6.91 (s, 1H), 6.66 (d,  $J = 8.5$ , 1H), 5.26 (d,  $J = 6.0$  Hz, 1H, N-H), 3.75 (s, 3H), 3.70 (s, 3H), 3.56-3.52 (m, 1H), 2.72-2.62 (m, 2H), 1.32 (d,  $J = 6.0$  Hz, 3H);  $^{13}\text{C NMR}$  (125 MHz,  $\text{CDCl}_3$ )  $\delta$  168.66, 156.38, 149.46, 146.13, 141.64, 133.75, 131.61, 131.47, 130.58, 130.10, 130.06, 128.15, 128.08, 127.06, 125.05, 123.81, 110.10, 55.35, 52.17, 51.18, 37.83, 23.20. HRMS (ESI-TOF)  $m/z$  Calcd for  $\text{C}_{24}\text{H}_{23}\text{N}_2\text{O}_7\text{S}$   $[\text{M}-\text{H}]^-$ : 483.1231. found: 483.1235.



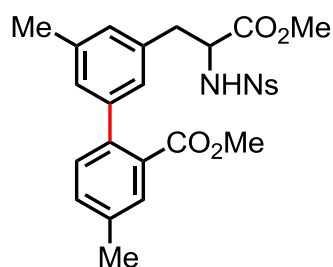

**methyl**

**3'-((3-methoxy-2-((4-nitrophenyl)sulfonamido)-3-oxopropyl)-4,5'-dimethyl-[1,1'-biphenyl]-2-carboxylate 3jb**

$^1\text{H}$  NMR (500 MHz,  $\text{CDCl}_3$ )  $\delta$  8.20 (d,  $J = 9.0$  Hz, 2H), 7.90 (d,  $J = 8.5$  Hz, 2H), 7.69 (d,  $J = 2.0$  Hz, 1H), 7.33 (dd,  $J = 2.0, 8.0$  Hz, 1H), 7.15 (d,  $J = 7.5$  Hz, 1H), 6.97 (s, 1H), 6.79 (s, 1H), 6.73 (s, 1H), 5.55 (d,  $J = 5.0$  Hz, 1H, N-H), 4.30-4.28 (m, 1H), 3.74 (s, 3H), 3.60 (s, 3H), 3.06 (dd,  $J = 5.0, 14.0$  Hz, 1H), 3.00 (dd,  $J = 7.0, 13.5$  Hz, 1H), 2.42 (s, 3H), 2.24 (s, 3H);  $^{13}\text{C}$  NMR (125 MHz,  $\text{CDCl}_3$ )  $\delta$  170.97, 168.67, 149.83, 145.78, 141.59, 139.52, 138.15, 137.29, 133.96, 132.23, 130.60, 129.79, 128.38, 128.30, 128.27, 127.04, 124.01, 57.00, 52.58, 52.14, 38.83, 21.24, 20.93. HRMS (ESI-TOF)  $m/z$  Calcd for  $\text{C}_{26}\text{H}_{25}\text{N}_2\text{O}_8\text{S}$   $[\text{M}-\text{H}]^-$ : 525.1337. found: 525.1338.

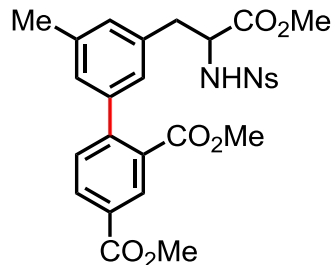

**dimethyl 3'-((3-methoxy-2-((4-nitrophenyl)sulfonamido)-3-oxopropyl)-5'-methyl-[1,1'-biphenyl]-2,4-dicarboxylate 3jc**

$^1\text{H}$  NMR (500 MHz,  $\text{CDCl}_3$ )  $\delta$  8.22 (d,  $J = 8.5$  Hz, 2H), 8.05 (d,  $J = 8.0$  Hz, 1H), 7.93-7.89 (m, 4H), 7.00 (s, 1H), 6.84 (s, 1H), 6.82 (s, 1H), 5.63 (d,  $J = 8.5$  Hz, 1H, N-H), 4.31-4.29 (m, 1H), 3.96 (s, 3H), 3.77 (s, 3H), 3.61 (s, 3H), 3.09 (dd,  $J = 5.0, 14.0$  Hz, 1H), 3.01 (dd,  $J = 7.0, 13.5$  Hz, 1H), 2.27 (s, 3H);  $^{13}\text{C}$  NMR (125 MHz,  $\text{CDCl}_3$ )  $\delta$  170.93, 167.98, 166.01, 149.84, 145.72, 142.24, 140.53, 138.39, 134.49, 134.12, 132.51, 131.62, 130.00, 129.09, 128.26, 128.21, 128.15, 126.77, 124.03, 57.02, 52.60, 52.47, 52.44, 38.86, 21.21. HRMS (ESI-TOF)  $m/z$  Calcd for  $\text{C}_{27}\text{H}_{25}\text{N}_2\text{O}_{10}\text{S}$   $[\text{M}-\text{H}]^-$ : 569.1235. found: 569.1236.

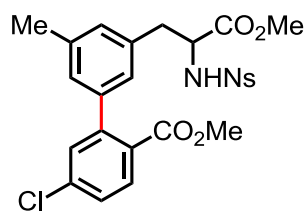

**methyl**

**5-chloro-3'-(3-methoxy-2-(4-nitrophenylsulfonamido)-3-oxopropyl)-5'-methyl-[1,1'-biphenyl]-2-carboxylate 3jd**

$^1\text{H}$  NMR (500 MHz,  $\text{CDCl}_3$ )  $\delta$  8.23 (d,  $J = 8.5$  Hz, 2H), 7.92 (d,  $J = 9.0$  Hz, 2H), 7.85 (d,  $J = 8.5$  Hz, 1H), 7.38 (dd,  $J = 2.5, 8.5$  Hz, 1H), 7.26 (s, 1H), 6.97 (s, 1H), 6.83 (s, 1H), 6.79 (s, 1H), 5.64 (d,  $J = 8.5$  Hz, 1H, N-H), 4.32-4.28 (m, 1H), 3.75 (s, 3H), 3.59 (s, 3H), 3.08 (dd,  $J = 5.0, 14.0$  Hz, 1H), 3.02 (dd,  $J = 7.0, 14.0$  Hz, 1H), 2.26 (s, 3H);  $^{13}\text{C}$  NMR (125 MHz,  $\text{CDCl}_3$ )  $\delta$  170.87, 167.43, 149.85, 145.76, 144.33, 140.30, 138.34, 137.60, 134.23, 131.67, 130.80, 129.06, 128.28, 128.20, 128.04, 127.44, 126.87, 124.02, 56.97, 52.56, 52.29, 38.83, 21.20. HRMS (ESI-TOF)  $m/z$  Calcd for  $\text{C}_{25}\text{H}_{22}\text{ClN}_2\text{O}_8\text{S}$   $[\text{M}-\text{H}]^-$ : 545.0791. found ESI-MS: 545.

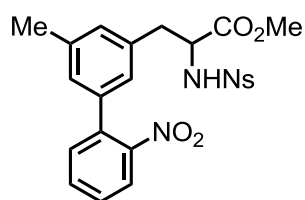

**methyl 3-(5-methyl-2'-nitro-[1,1'-biphenyl]-3-yl)-2-(4-nitrophenylsulfonamido)propanoate 3je**

$^1\text{H}$  NMR (400 MHz,  $\text{CDCl}_3$ )  $\delta$  8.23 (dd,  $J = 2.0, 8.8$  Hz, 2H), 7.92 (dd,  $J = 2.0, 8.8$  Hz, 2H), 7.84 (dd,  $J = 1.2, 8.0$  Hz, 1H), 7.60 (t,  $J = 7.4$  Hz, 1H), 7.48 (t,  $J = 7.8$  Hz, 1H), 7.35 (d,  $J = 8.0$  Hz, 1H), 7.00 (s, 1H), 6.88 (s, 1H), 6.81 (s, 1H), 5.58 (d,  $J = 8.8$  Hz, 1H, N-H), 4.31-4.26 (m, 1H), 3.60 (s, 3H), 3.08 (dd,  $J = 5.2, 14.0$  Hz, 1H), 3.00 (dd,  $J = 7.0, 14.0$  Hz, 1H), 2.27 (s, 3H);  $^{13}\text{C}$  NMR (100 MHz,  $\text{CDCl}_3$ )  $\delta$  170.94, 149.90, 149.06, 138.88, 137.82, 135.78, 135.19, 132.35, 131.72, 129.80, 128.31, 128.27, 127.66, 125.95, 124.07, 56.89, 52.73, 38.90, 21.20. HRMS (ESI-TOF)  $m/z$  Calcd for  $\text{C}_{23}\text{H}_{20}\text{N}_3\text{O}_8\text{S}$   $[\text{M}-\text{H}]^-$ : 498.0977. found: 498.0977.

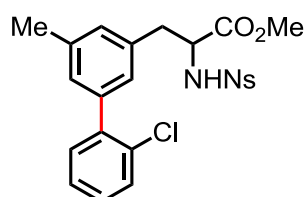

**methyl 3-(2'-chloro-5-methyl-[1,1'-biphenyl]-3-yl)-2-(4-nitrophenylsulfonamido)propanoate**  
**3jf**

$^1\text{H NMR}$  (500 MHz,  $\text{CDCl}_3$ )  $\delta$  8.16 (d,  $J = 9.0$  Hz, 2H), 7.81 (d,  $J = 8.5$  Hz, 1H), 7.44 (d,  $J = 1.5$  Hz, 1H), 7.35-7.31 (m, 3H), 7.20 (s, 1H), 7.00 (s, 1H), 6.85 (s, 1H), 5.40 (d,  $J = 9.5$  Hz, 1H, N-H), 4.32-4.28 (m, 1H), 3.66 (s, 3H), 3.14 (dd,  $J = 5.0, 14.0$  Hz, 1H), 2.95 (dd,  $J = 8.0, 13.5$  Hz, 1H), 2.31 (s, 3H);  $^{13}\text{C NMR}$  (125 MHz,  $\text{CDCl}_3$ )  $\delta$  171.16, 149.83, 145.53, 142.20, 140.12, 139.05, 135.55, 134.73, 130.07, 129.54, 128.08, 127.53, 127.01, 126.86, 125.04, 125.00, 123.98, 57.17, 52.82, 39.13, 21.32. HRMS (ESI-TOF)  $m/z$  Calcd for  $\text{C}_{23}\text{H}_{20}\text{ClN}_2\text{O}_6\text{S}$  [M-H] $^-$ : 487.0736. found: 487.0736.

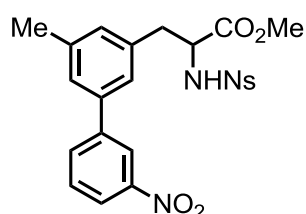

**methyl 3-(5-methyl-3'-nitro-[1,1'-biphenyl]-3-yl)-2-(4-nitrophenylsulfonamido)propanoate**  
**3jg**

$^1\text{H NMR}$  (500 MHz,  $\text{CDCl}_3$ )  $\delta$  8.32 (s, 1H), 8.21-8.17 (m, 3H), 7.86 (d,  $J = 8.5$  Hz, 2H), 7.83 (d,  $J = 7.5$  Hz, 1H), 7.60 (t,  $J = 8.0$  Hz, 1H), 7.29 (s, 1H), 7.10 (s, 1H), 6.94 (s, 1H), 5.41 (br, 1H, N-H), 4.32 (br, 1H), 3.66 (s, 3H), 3.18 (dd,  $J = 5.0, 14.0$  Hz, 1H), 3.01 (dd,  $J = 8.0, 14.0$  Hz, 1H), 2.36 (s, 3H);  $^{13}\text{C NMR}$  (125 MHz,  $\text{CDCl}_3$ )  $\delta$  171.03, 149.90, 148.71, 145.54, 142.12, 139.41, 139.00, 135.89, 132.77, 130.29, 129.84, 128.15, 126.94, 125.17, 124.04, 122.25, 121.73, 57.05, 52.87, 39.14, 21.36. HRMS (ESI-TOF)  $m/z$  Calcd for  $\text{C}_{23}\text{H}_{20}\text{N}_3\text{O}_8\text{S}$  [M-H] $^-$ : 498.0977. found: 498.0976.

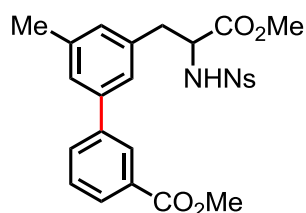

**methyl**  
**3'-(3-methoxy-2-(4-nitrophenylsulfonamido)-3-oxopropyl)-5'-methyl-[1,1'-biphenyl]-3-carboxylate**  
**3jh**

$^1\text{H NMR}$  (500 MHz,  $\text{CDCl}_3$ )  $\delta$  8.13 (d,  $J = 8.5$  Hz, 2H), 8.12 (s, 1H), 8.01 (d,  $J = 8.0$  Hz, 1H), 7.80

(d,  $J = 7.5$  Hz, 2H), 7.67 (d,  $J = 8.0$  Hz, 1H), 7.49 (t,  $J = 8.0$  Hz, 1H), 7.26 (s, 1H), 7.06 (s, 1H), 6.87 (s, 1H), 5.53 (d,  $J = 9.0$  Hz, 1H, N-H), 4.33-4.28 (m, 1H), 3.96 (s, 3H), 3.67 (s, 3H), 3.15 (dd,  $J = 5.0, 13.5$  Hz, 1H), 2.95 (dd,  $J = 7.5, 14.0$  Hz, 1H), 2.32 (s, 3H);  $^{13}\text{C}$  NMR (125 MHz,  $\text{CDCl}_3$ )  $\delta$  171.22, 166.95, 149.77, 145.56, 140.57, 140.37, 139.02, 135.64, 131.19, 130.72, 129.44, 128.96, 128.56, 128.04, 127.96, 126.83, 125.05, 123.95, 57.24, 52.81, 52.25, 39.06, 21.32. HRMS (ESI-TOF)  $m/z$  Calcd for  $\text{C}_{25}\text{H}_{23}\text{N}_2\text{O}_8\text{S}$  [M-H]: 511.1181. found: 511.1181.

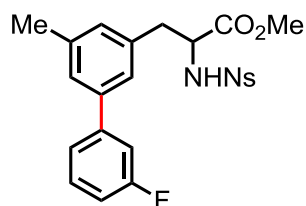

**methyl 3-(3'-fluoro-5-methyl-[1,1'-biphenyl]-3-yl)-2-(4-nitrophenylsulfonamido)propanoate 3ji**

$^1\text{H}$  NMR (500 MHz,  $\text{CDCl}_3$ )  $\delta$  8.15 (d,  $J = 8.5$  Hz, 2H), 7.81 (d,  $J = 8.5$  Hz, 2H), 7.40-7.35 (m, 1H), 7.25 (d,  $J = 8.5$  Hz, 1H), 7.21 (s, 1H), 7.17 (m, 1H), 7.05-7.01 (m, 2H), 6.85 (s, 1H), 5.45 (d,  $J = 9.0$  Hz, 1H, N-H), 4.32-4.28 (m, 1H), 3.66 (s, 3H), 3.14 (dd,  $J = 5.0, 14.0$  Hz, 1H), 2.95 (dd,  $J = 8.0, 14.0$  Hz, 1H), 2.31 (s, 3H);  $^{13}\text{C}$  NMR (125 MHz,  $\text{CDCl}_3$ )  $\delta$  171.20, 163.14 (d,  $^1J_{\text{CF}} = 244.7$  Hz), 149.82, 145.53, 142.62 (d,  $^3J_{\text{CF}} = 7.5$  Hz), 140.23, 139.01, 135.53, 130.32 (d,  $^3J_{\text{CF}} = 7.5$  Hz), 129.51, 128.07, 126.83, 125.03, 123.97, 122.46, 114.33 (d,  $^2J_{\text{CF}} = 21.2$  Hz), 113.74 (d,  $^2J_{\text{CF}} = 22.8$  Hz), 57.18, 52.81, 39.10, 21.31. HRMS (ESI-TOF)  $m/z$  Calcd for  $\text{C}_{23}\text{H}_{20}\text{FN}_2\text{O}_6\text{S}$  [M-H]: 471.1032. found: 471.1031.

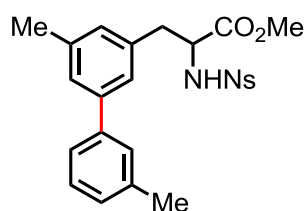

**methyl 3-(3',5-dimethyl-[1,1'-biphenyl]-3-yl)-2-(4-nitrophenylsulfonamido)propanoate 3jj**

$^1\text{H}$  NMR (500 MHz,  $\text{CDCl}_3$ )  $\delta$  8.12 (d,  $J = 9.0$  Hz, 2H), 7.77 (d,  $J = 9.0$  Hz, 2H), 7.32-7.25 (m, 3H), 7.22 (s, 1H), 7.16 (d,  $J = 7.5$  Hz, 1H), 7.01 (s, 1H), 6.79 (s, 1H), 5.32 (d,  $J = 9.0$  Hz, 1H, N-H), 4.31-4.26 (m, 1H), 3.67 (s, 3H), 3.13 (dd,  $J = 5.0, 14.0$  Hz, 1H), 2.92 (dd,  $J = 8.0, 14.0$  Hz, 1H), 2.41 (s, 3H), 2.30 (s, 3H);  $^{13}\text{C}$  NMR (125 MHz,  $\text{CDCl}_3$ )  $\delta$  171.26, 149.78, 145.51, 141.70, 140.26, 138.77, 138.47, 135.28, 128.81, 128.75, 128.32, 128.05, 127.61, 126.91, 125.04, 123.94, 57.29, 52.80, 39.18, 21.50, 21.34. HRMS (ESI-TOF)  $m/z$  Calcd for  $\text{C}_{24}\text{H}_{23}\text{N}_2\text{O}_6\text{S}$  [M-H]: 467.1282.

found: 467.1285.

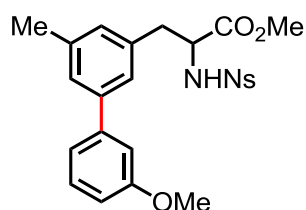

**methyl**

**3-(3'-methoxy-5-methyl-[1,1'-biphenyl]-3-yl)-2-(4-nitrophenylsulfonamido)propanoate 3jk**

$^1\text{H}$  NMR (500 MHz,  $\text{CDCl}_3$ )  $\delta$  8.13 (d,  $J = 9.0$  Hz, 2H), 7.78 (d,  $J = 9.0$  Hz, 2H), 7.33 (t,  $J = 8.0$  Hz, 1H), 7.22 (s, 1H), 7.05 (d,  $J = 7.5$  Hz, 1H), 7.02 (s, 1H), 6.99 (s, 1H), 6.89 (dd,  $J = 2.5, 8.5$  Hz, 1H), 6.81 (s, 1H), 5.42 (d,  $J = 8.5$  Hz, 1H, N-H), 4.31-4.27 (m, 1H), 3.87 (s, 3H), 3.67 (s, 3H), 3.13 (dd,  $J = 5.0, 14.0$  Hz, 1H), 2.93 (dd,  $J = 8.0, 13.5$  Hz, 1H), 2.29 (s, 3H);  $^{13}\text{C}$  NMR (125 MHz,  $\text{CDCl}_3$ )  $\delta$  171.27, 159.97, 149.77, 145.52, 141.79, 141.36, 138.80, 135.34, 129.84, 129.05, 128.03, 126.88, 125.07, 123.96, 119.29, 112.77, 57.23, 55.31, 52.79, 39.09, 21.32. HRMS (ESI-TOF)  $m/z$  Calcd for  $\text{C}_{24}\text{H}_{23}\text{N}_2\text{O}_7\text{S}$  [M-H] $^-$ : 483.1231. found: 483.1234

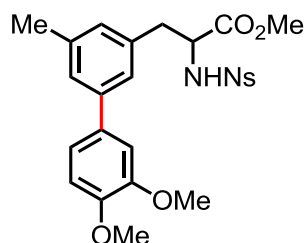

**methyl**

**3-(3',4'-dimethoxy-5-methyl-[1,1'-biphenyl]-3-yl)-2-(4-nitrophenylsulfonamido)propanoate 3jl**

$^1\text{H}$  NMR (500 MHz,  $\text{CDCl}_3$ )  $\delta$  8.13 (d,  $J = 9.0$  Hz, 2H), 7.78 (d,  $J = 9.0$  Hz, 2H), 7.17 (s, 1H), 7.03-7.02 (m, 3H), 6.92 (d,  $J = 9.0$  Hz, 1H), 6.76 (s, 1H), 5.47 (d,  $J = 9.0$  Hz, 1H, N-H), 4.32-4.28 (m, 1H), 3.96 (s, 3H), 3.92 (s, 3H), 3.67 (s, 3H), 3.14 (dd,  $J = 5.0, 14.0$  Hz, 1H), 2.93 (dd,  $J = 8.5, 14.0$  Hz, 1H), 2.28 (s, 3H);  $^{13}\text{C}$  NMR (125 MHz,  $\text{CDCl}_3$ )  $\delta$  171.29, 149.74, 149.24, 148.84, 145.53, 141.30, 138.75, 135.33, 133.25, 128.40, 127.99, 126.45, 124.73, 123.91, 119.13, 111.51, 110.15, 57.24, 56.00, 55.97, 52.77, 39.05, 21.32. HRMS (ESI-TOF)  $m/z$  Calcd for  $\text{C}_{25}\text{H}_{25}\text{N}_2\text{O}_8\text{S}$  [M-H] $^-$ : 513.1337. found: 513.1335.

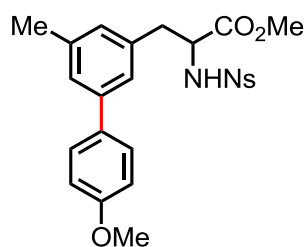

**methyl**

**3-(4'-methoxy-5-methyl-[1,1'-biphenyl]-3-yl)-2-(4-nitrophenylsulfonamido)propanoate 3jm**

$^1\text{H NMR}$  (500 MHz,  $\text{CDCl}_3$ )  $\delta$  8.11 (d,  $J = 9.0$  Hz, 2H), 7.77 (d,  $J = 9.0$  Hz, 2H), 7.40 (d,  $J = 8.5$  Hz, 2H), 7.17 (s, 1H), 6.97 (s, 1H), 6.95 (d,  $J = 8.5$  Hz, 2H), 6.75 (s, 1H), 5.40 (d,  $J = 8.5$  Hz, 1H, N-H), 4.30-4.26 (m, 1H), 3.85 (s, 3H), 3.67 (s, 3H), 3.12 (dd,  $J = 5.0, 14.0$  Hz, 1H), 2.91 (dd,  $J = 8.0, 13.5$  Hz, 1H), 2.28 (s, 3H);  $^{13}\text{C NMR}$  (125 MHz,  $\text{CDCl}_3$ )  $\delta$  171.30, 159.34, 149.75, 145.52, 141.10, 138.76, 135.30, 132.73, 128.26, 128.01, 127.83, 126.38, 124.55, 123.92, 114.28, 57.28, 55.35, 52.79, 39.11, 21.34. HRMS (ESI-TOF)  $m/z$  Calcd for  $\text{C}_{24}\text{H}_{23}\text{N}_2\text{O}_7\text{S}$   $[\text{M}-\text{H}]^-$ : 483.1231. found: 483.1234.

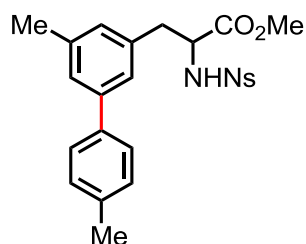

**methyl 3-(4',5-dimethyl-[1,1'-biphenyl]-3-yl)-2-(4-nitrophenylsulfonamido)propanoate 3jn**

$^1\text{H NMR}$  (400 MHz,  $\text{CDCl}_3$ )  $\delta$  8.10 (d,  $J = 8.8$  Hz, 2H), 7.76 (d,  $J = 8.8$  Hz, 2H), 7.36 (d,  $J = 8.0$  Hz, 2H), 7.22 (d,  $J = 8.8$  Hz, 2H), 7.20 (s, 1H), 7.00 (s, 1H), 6.77 (s, 1H), 5.45 (d,  $J = 9.2$  Hz, 1H, N-H), 4.31-4.25 (m, 1H), 3.67 (s, 3H), 3.12 (dd,  $J = 4.8, 14.0$  Hz, 1H), 2.91 (dd,  $J = 8.4, 14.0$  Hz, 1H), 2.39 (s, 3H), 2.28 (s, 3H);  $^{13}\text{C NMR}$  (100 MHz,  $\text{CDCl}_3$ )  $\delta$  171.34, 149.72, 145.48, 141.41, 138.75, 137.41, 137.31, 135.31, 129.54, 128.58, 127.99, 126.61, 124.77, 123.91, 57.29, 52.79, 39.05, 21.32, 21.06. HRMS (ESI-TOF)  $m/z$  Calcd for  $\text{C}_{24}\text{H}_{23}\text{N}_2\text{O}_6\text{S}$   $[\text{M}-\text{H}]^-$ : 467.1282. found: 467.1280.

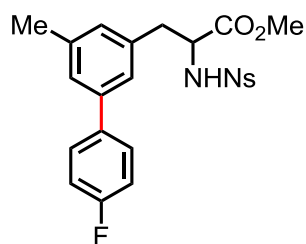

**methyl 3-(4'-fluoro-5-methyl-[1,1'-biphenyl]-3-yl)-2-(4-nitrophenylsulfonamido)propanoate**  
**3jo**

$^1\text{H}$  NMR (500 MHz,  $\text{CDCl}_3$ )  $\delta$  8.15 (d,  $J = 8.5$  Hz, 2H), 7.80 (d,  $J = 8.5$  Hz, 2H), 7.45-7.42 (m, 2H), 7.17 (s, 1H), 7.10 (t,  $J = 8.5$  Hz, 2H), 7.00 (s, 1H), 6.81 (s, 1H), 5.43 (d,  $J = 9.0$  Hz, 1H, N-H), 4.31-4.27 (m, 1H), 3.66 (s, 3H), 3.13 (dd,  $J = 5.0, 14.0$  Hz, 1H), 2.94 (dd,  $J = 8.0, 14.0$  Hz, 1H), 2.30 (s, 3H);  $^{13}\text{C}$  NMR (125 MHz,  $\text{CDCl}_3$ )  $\delta$  171.21, 162.55 (d,  $J = 245.2$  Hz), 149.81, 145.54, 140.56, 138.92, 136.46 (d,  $J = 3.0$  Hz), 135.44, 128.90, 128.43 (d,  $J = 7.8$  Hz), 128.07, 126.75, 124.96, 123.95, 115.72 (d,  $J = 21.1$  Hz), 57.20, 52.79, 39.12, 21.32. HRMS (ESI-TOF)  $m/z$  Calcd for  $\text{C}_{23}\text{H}_{20}\text{FN}_2\text{O}_6\text{S}$   $[\text{M}-\text{H}]^-$ : 471.1032. found: 471.1032.

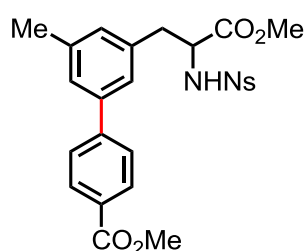

**methyl 3'-(3-methoxy-2-(4-nitrophenylsulfonamido)-3-oxopropyl)-5'-methyl-[1,1'-biphenyl]-4-carboxylate**  
**3jp**

$^1\text{H}$  NMR (500 MHz,  $\text{CDCl}_3$ )  $\delta$  8.14 (d,  $J = 9.0$  Hz, 2H), 8.08 (d,  $J = 8.5$  Hz, 2H), 7.81 (d,  $J = 8.5$  Hz, 2H), 7.55 (d,  $J = 8.0$  Hz, 2H), 7.26 (s, 1H), 7.09 (s, 1H), 6.87 (s, 1H), 5.49 (d,  $J = 9.0$  Hz, 1H, N-H), 4.33-4.28 (m, 1H), 3.94 (s, 3H), 3.65 (s, 3H), 3.15 (dd,  $J = 5.0, 14.0$  Hz, 1H), 2.97 (dd,  $J = 8.0, 13.5$  Hz, 1H), 2.32 (s, 3H);  $^{13}\text{C}$  NMR (125 MHz,  $\text{CDCl}_3$ )  $\delta$  171.15, 166.87, 149.82, 145.55, 144.76, 140.31, 139.05, 135.61, 130.14, 129.79, 129.15, 128.06, 127.00, 126.78, 125.26, 123.96, 57.18, 52.79, 52.16, 39.11, 21.32. HRMS (ESI-TOF)  $m/z$  Calcd for  $\text{C}_{25}\text{H}_{23}\text{N}_2\text{O}_8\text{S}$   $[\text{M}-\text{H}]^-$ : 511.1181. found: 511.1185.

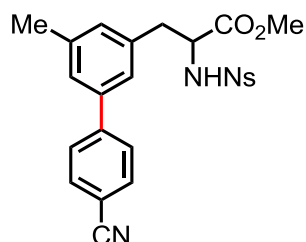

**methyl 3-(4'-cyano-5-methyl-[1,1'-biphenyl]-3-yl)-2-(4-nitrophenylsulfonamido)propanoate**  
**3jq**

$^1\text{H}$  NMR (500 MHz,  $\text{CDCl}_3$ )  $\delta$  8.17 (d,  $J = 8.5$  Hz, 2H), 7.84 (d,  $J = 9.0$  Hz, 2H), 7.71 (d,  $J = 8.0$  Hz, 2H), 7.60 (d,  $J = 8.0$  Hz, 2H), 7.23 (s, 1H), 7.09 (s, 1H), 6.91 (s, 1H), 5.53 (d,  $J = 9.0$  Hz, 1H, N-H), 4.33-4.28 (m, 1H), 3.64 (s, 3H), 3.17 (dd,  $J = 5.0, 13.5$  Hz, 1H), 2.99 (dd,  $J = 7.5, 14.0$  Hz, 1H), 2.33 (s, 3H);  $^{13}\text{C}$  NMR (125 MHz,  $\text{CDCl}_3$ )  $\delta$  171.07, 149.87, 145.52, 144.89, 139.49, 139.28, 135.84, 132.64, 130.31, 128.10, 127.52, 126.97, 125.30, 124.00, 118.77, 111.15, 57.07, 52.82, 39.08, 21.32. HRMS (ESI-TOF)  $m/z$  Calcd for  $\text{C}_{24}\text{H}_{20}\text{N}_3\text{O}_6\text{S}$   $[\text{M}-\text{H}]^-$ : 478.1078. found: 478.1074.

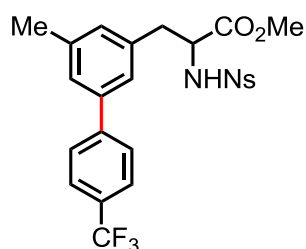

**methyl**

**3-(5-methyl-4'-(trifluoromethyl)-[1,1'-biphenyl]-3-yl)-2-(4-nitrophenylsulfonamido)propanoate 3jr**

$^1\text{H}$  NMR (400 MHz,  $\text{CDCl}_3$ )  $\delta$  8.15 (d,  $J = 8.8$  Hz, 2H), 7.82 (d,  $J = 8.8$  Hz, 2H), 7.67 (d,  $J = 8.4$  Hz, 2H), 7.59 (d,  $J = 8.4$  Hz, 2H), 7.23 (s, 1H), 7.09 (s, 1H), 6.88 (s, 1H), 5.60 (m,  $J = 9.0$  Hz, 1H, N-H), 4.32-4.28 (m, 1H), 3.65 (s, 3H), 3.16 (dd,  $J = 5.0, 14.0$  Hz, 1H), 2.95 (dd,  $J = 8.0, 14.0$  Hz, 1H), 2.31 (s, 3H);  $^{13}\text{C}$  NMR (150 MHz,  $\text{CDCl}_3$ )  $\delta$  171.25, 149.78, 145.46, 143.84, 140.00, 139.12, 135.69, 129.81, 129.54 (q,  $J = 32.5$  Hz), 128.04, 127.15, 126.94, 125.75 (q,  $J = 3.7$  Hz), 125.28, 124.17 (q,  $J = 270.6$  Hz), 123.97, 57.16, 52.83, 38.98, 21.29.

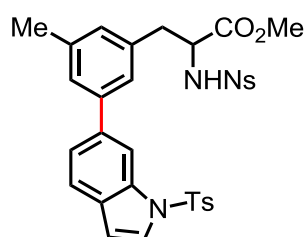

**methyl**

**3-(3-methyl-5-(1-tosyl-1H-indol-6-yl)phenyl)-2-(4-nitrophenylsulfonamido)propanoate 3js**

$^1\text{H}$  NMR (500 MHz,  $\text{CDCl}_3$ )  $\delta$  8.10 (d,  $J = 9.0$  Hz, 2H), 8.02 (d,  $J = 8.5$  Hz, 1H), 7.79 (d,  $J = 8.0$  Hz, 2H), 7.77 (d,  $J = 8.5$  Hz, 2H), 7.61 (d,  $J = 1.5$  Hz, 1H), 7.59 (d,  $J = 3.5$  Hz, 1H), 7.42 (dd,  $J = 1.5, 8.5$  Hz, 1H), 7.26-7.21 (m, 3H), 7.04 (s, 1H), 6.78 (s, 1H), 6.69 (d,  $J = 1.5$  Hz, 1H), 5.39 (d,  $J = 9.0$  Hz, 1H, N-H), 4.31-4.26 (m, 1H), 3.65 (s, 3H), 3.13 (dd,  $J = 5.0, 14.0$  Hz, 1H), 2.93 (dd,  $J = 8.0, 14.0$  Hz, 1H), 2.34 (s, 3H), 2.28 (s, 3H);  $^{13}\text{C}$  NMR (125 MHz,  $\text{CDCl}_3$ )  $\delta$  171.22, 149.78, 145.53,



145.02, 141.61, 138.83, 135.89, 135.38, 135.28, 134.32, 131.32, 129.93, 128.65, 128.04, 127.07, 126.82, 125.31, 123.92, 123.80, 119.58, 113.81, 109.18, 57.27, 52.79, 39.18, 21.33. HRMS (ESI-TOF)  $m/z$  Calcd for  $C_{32}H_{28}N_3O_8S_2$  [M-H]<sup>-</sup>: 646.1323. found: 646.1323.

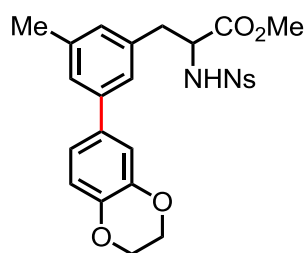

**methyl**

**3-(3-(2,3-dihydrobenzo[b][1,4]dioxin-6-yl)-5-methylphenyl)-2-(4-nitrophenylsulfonamido)propanoate 3jt**

<sup>1</sup>H NMR (500 MHz, CDCl<sub>3</sub>) δ 8.13 (dd,  $J = 2.0, 9.0$  Hz, 2H), 7.77 (dd,  $J = 2.0, 9.0$  Hz, 2H), 7.16 (s, 1H), 6.96-6.89 (m, 4H), 6.76 (s, 1H), 5.30 (d,  $J = 9.0$  Hz, 1H, N-H), 4.30-4.26 (m, 5H), 3.68 (s, 3H), 3.11 (dd,  $J = 5.0, 14.0$  Hz, 1H), 2.90 (dd,  $J = 8.0, 14.0$  Hz, 1H), 2.28 (s, 3H); <sup>13</sup>C NMR (125 MHz, CDCl<sub>3</sub>) δ 171.27, 149.79, 145.50, 143.73, 143.38, 140.88, 138.79, 135.26, 133.74, 128.49, 128.05, 126.46, 124.52, 123.97, 119.78, 117.63, 115.53, 64.46, 64.42, 57.23, 52.82, 39.13, 21.35. HRMS (ESI-TOF)  $m/z$  Calcd for  $C_{25}H_{23}N_2O_8S$  [M-H]<sup>-</sup>: 511.1181. found: 511.1179.

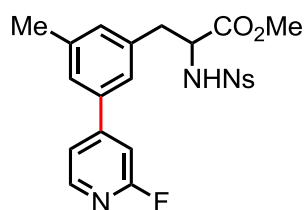

**methyl 3-(3-(2-fluoropyridin-4-yl)-5-methylphenyl)-2-(4-nitrophenylsulfonamido)propanoate 3ju**

<sup>1</sup>H NMR (500 MHz, CDCl<sub>3</sub>) δ 8.26 (d,  $J = 5.5$  Hz, 1H), 8.21 (d,  $J = 8.5$  Hz, 2H), 7.87 (d,  $J = 8.5$  Hz, 2H), 7.32 (d,  $J = 8.5$  Hz, 1H), 7.28 (s, 1H), 7.14 (s, 1H), 7.05 (s, 1H), 6.98 (s, 1H), 5.55 (d,  $J = 9.0$  Hz, 1H, N-H), 4.34-4.30 (m, 1H), 3.63 (s, 3H), 3.18 (dd,  $J = 5.0, 14.0$  Hz, 1H), 2.97 (dd,  $J = 7.5, 14.0$  Hz, 1H), 2.35 (s, 3H); <sup>13</sup>C NMR (125 MHz, CDCl<sub>3</sub>) δ 170.94, 164.47 (d,  $J = 236.7$  Hz), 153.46 (d,  $J = 7.8$  Hz), 149.93, 148.10 (d,  $J = 15.2$  Hz), 145.53, 139.49, 137.40, 136.02, 131.39, 128.14, 126.80, 125.16, 124.05, 119.33, 106.95 (d,  $J = 31.2$  Hz), 56.99, 52.84, 39.10, 21.32. HRMS (ESI-TOF)  $m/z$  Calcd for  $C_{22}H_{19}FN_3O_6S$  [M-H]<sup>-</sup>: 472.0984. found: 472.0980.

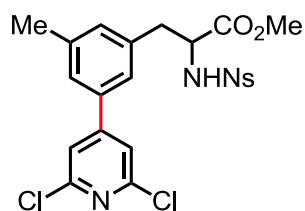

**methyl**

**3-(3-(2,6-dichloropyridin-4-yl)-5-methylphenyl)-2-(4-nitrophenylsulfonamido)propanoate**

**3jv**

$^1\text{H}$  NMR (500 MHz,  $\text{CDCl}_3$ )  $\delta$  8.24 (d,  $J = 8.5$  Hz, 2H), 7.89 (d,  $J = 9.0$  Hz, 2H), 7.39 (s, 2H), 7.26 (s, 1H), 7.11 (s, 1H), 7.01 (s, 1H), 5.42 (br, 1H, N-H), 4.32-4.30 (m, 1H), 3.62 (s, 3H), 3.18 (dd,  $J = 5.0, 14.0$  Hz, 1H), 3.02 (dd,  $J = 7.5, 14.0$  Hz, 1H), 2.36 (s, 3H);  $^{13}\text{C}$  NMR (125 MHz,  $\text{CDCl}_3$ )  $\delta$  170.84, 153.34, 151.10, 149.99, 145.45, 139.73, 136.19, 136.14, 131.93, 128.18, 126.86, 125.21, 124.11, 120.63, 56.88, 52.87, 39.10, 21.31. HRMS (ESI-TOF)  $m/z$ . Calcd for  $\text{C}_{22}\text{H}_{18}\text{Cl}_2\text{N}_3\text{O}_6\text{S}$   $[\text{M}-\text{H}]^-$ : 522.0299. found: 522.0305.

**3.4 General Procedure for *meta*-C(sp<sup>2</sup>)-H Arylation of 2-Aryl Anilines (Tables 5).**

The starting material **4** (0.10mmol),  $\text{Pd}(\text{OAc})_2$  (0.01mmol, 2.2 mg), and  $\text{AgOAc}$  (0.30mmol, 50.0 mg) were weighed in air and placed in a sealed tube (10 mL) with a magnetic stir bar. To the reaction mixture, 4-acetylpyridine (0.02 mmol, 2.2  $\mu\text{L}$ ), norbornene (0.15 mmol, 14.0 mg), aryl iodide **2** (0.3mmol), and TBME (1.0 mL) were added. The reaction mixture was heated to 80 °C for 24 hours under vigorous stirring. Upon completion, the reaction mixture was cooled to room temperature, diluted with ethyl acetate, and filtered through a pad of celite. The filtrate was concentrated *in vacuo*, and the resulting residue purified by preparative TLC using an eluent of hexanes/ethyl acetate (2/1 to 4/1) to give the desired products **5**.

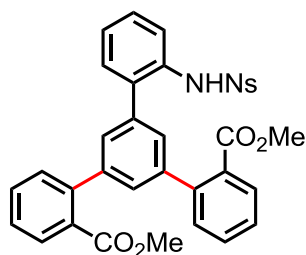

**dimethyl 5'-(2-(4-nitrophenylsulfonamido)phenyl)-[1,1':3',1''-terphenyl]-2,2''-dicarboxylate**

**5a**

$^1\text{H}$  NMR (500 MHz,  $\text{CDCl}_3$ )  $\delta$  7.93 (d,  $J = 8.0$  Hz, 2H), 7.85 (d,  $J = 8.0$  Hz, 2H), 7.81 (d,  $J = 9.0$  Hz, 2H), 7.59 (d,  $J = 8.5$  Hz, 2H), 7.55 (t,  $J = 7.5$  Hz, 1H), 7.48-7.45 (m, 3H), 7.41 (t,  $J = 8.0$  Hz, 1H), 7.29 (d,  $J = 8.0$  Hz, 2H), 7.25-7.23 (m, 2H), 7.19 (d,  $J = 8.0$  Hz, 1H), 6.60 (s, 2H), 3.82 (s, 6H);  $^{13}\text{C}$  NMR (100 MHz,  $\text{CDCl}_3$ )  $\delta$  168.48, 149.62, 144.64, 141.51, 141.44, 135.89, 135.36, 133.31, 131.83, 130.42, 130.39, 129.95, 129.92, 128.91, 128.33, 128.07, 127.88, 127.83, 126.11, 124.53, 123.71, 52.44. HRMS (ESI-TOF)  $m/z$  Calcd for  $\text{C}_{34}\text{H}_{25}\text{N}_2\text{O}_8\text{S}$   $[\text{M}-\text{H}]^-$ : 621.1337. found: 621.1340.

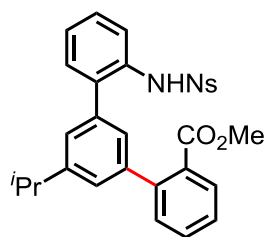

**methyl 5'-isopropyl-2''-(4-nitrophenylsulfonamido)-[1,1':3',1''-terphenyl]-2-carboxylate 5b**

$^1\text{H}$  NMR (500 MHz,  $\text{CDCl}_3$ )  $\delta$  7.95-7.92 (m, 3H), 7.82 (d,  $J = 8.0$  Hz, 1H), 7.65 (d,  $J = 8.5$  Hz, 2H), 7.56 (t,  $J = 7.5$  Hz, 1H), 7.48 (t,  $J = 7.5$  Hz, 1H), 7.40 (t,  $J = 8.0$  Hz, 1H), 7.28-7.15 (m, 5H), 6.66 (s, 1H), 6.41 (s, 1H), 3.83 (s, 3H), 2.83-2.80 (m, 1H), 1.23 (d,  $J = 6.0$  Hz, 6H);  $^{13}\text{C}$  NMR (100 MHz,  $\text{CDCl}_3$ )  $\delta$  168.43, 149.94, 149.81, 144.78, 142.30, 141.36, 136.17, 135.27, 133.00, 131.76, 130.58, 130.28, 130.19, 129.82, 128.74, 128.29, 127.71, 126.73, 126.08, 125.96, 125.78, 123.79, 123.56, 52.50, 33.90, 23.85. HRMS (ESI-TOF)  $m/z$  Calcd for  $\text{C}_{29}\text{H}_{25}\text{N}_2\text{O}_6\text{S}$   $[\text{M}-\text{H}]^-$ : 529.1439. found: 529.1441.

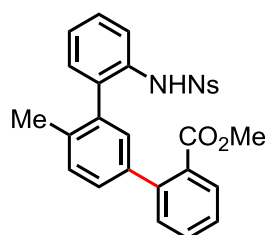

**methyl 4'-methyl-2''-(4-nitrophenylsulfonamido)-[1,1':3',1''-terphenyl]-2-carboxylate 5c**

$^1\text{H}$  NMR (500 MHz,  $\text{CDCl}_3$ )  $\delta$  7.92 (d,  $J = 8.0$  Hz, 1H), 7.87-7.84 (m, 3H), 7.66 (d,  $J = 8.5$  Hz, 2H), 7.54 (t,  $J = 7.5$  Hz, 1H), 7.47 (t,  $J = 7.5$  Hz, 1H), 7.40 (t,  $J = 8.0$  Hz, 1H), 7.26-7.20 (m, 4H), 7.09 (d,  $J = 7.5$  Hz, 1H), 6.92 (s, 1H), 6.31 (s, 1H), 3.83 (s, 3H), 1.75 (s, 3H);  $^{13}\text{C}$  NMR (125 MHz,  $\text{CDCl}_3$ )  $\delta$  168.61, 149.85, 144.98, 141.78, 138.83, 135.48, 135.21, 133.73, 133.18, 131.79, 130.59, 130.44, 130.28, 130.12, 129.86, 129.76, 128.79, 128.42, 128.32, 127.68, 125.70, 123.81, 123.40, 103.42, 52.49, 19.31. HRMS (ESI-TOF)  $m/z$  Calcd for  $\text{C}_{27}\text{H}_{21}\text{N}_2\text{O}_6\text{S}$  [M-H] $^-$ : 501.1126. found: 501.1126.

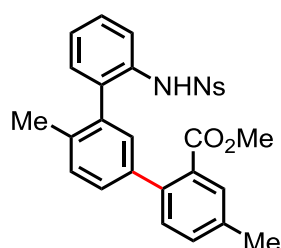

**methyl 4,4'-dimethyl-2''-(4-nitrophenylsulfonamido)-[1,1':3',1''-terphenyl]-2-carboxylate 5d**

$^1\text{H}$  NMR (500 MHz,  $\text{CDCl}_3$ )  $\delta$  7.86 (d,  $J = 8.0$  Hz, 1H), 7.81 (d,  $J = 9.0$  Hz, 2H), 7.70 (s, 1H), 7.64 (d,  $J = 9.0$  Hz, 2H), 7.40 (dt,  $J = 1.5, 7.5$  Hz, 1H), 7.33 (d,  $J = 7.5$  Hz, 1H), 7.22 (t,  $J = 7.5$  Hz, 1H), 7.21 (s, 2H), 7.12-7.08 (m, 2H), 6.82 (br, 1H), 6.18 (s, 1H), 3.80 (s, 3H), 2.48 (s, 3H), 1.77 (s, 3H);  $^{13}\text{C}$  NMR (125 MHz,  $\text{CDCl}_3$ )  $\delta$  168.87, 149.86, 144.88, 138.78, 137.81, 135.26, 135.21, 133.82, 133.21, 132.47, 130.69, 130.54, 130.27, 130.09, 129.82, 129.69, 128.79, 128.47, 128.30, 125.72, 123.81, 123.33, 52.40, 20.94, 19.30. HRMS (ESI-TOF)  $m/z$  Calcd for  $\text{C}_{28}\text{H}_{23}\text{N}_2\text{O}_6\text{S}$  [M-H] $^-$ : 515.1282. found: 515.1279.

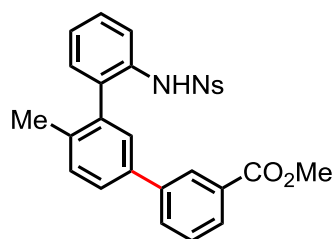

**methyl 4'-methyl-2''-(4-nitrophenylsulfonamido)-[1,1':3',1''-terphenyl]-3-carboxylate 5e**

$^1\text{H}$  NMR (500 MHz,  $\text{CDCl}_3$ )  $\delta$  8.07-8.05 (m, 2H), 7.92 (d,  $J = 8.5$  Hz, 2H), 7.82 (d,  $J = 8.0$  Hz, 1H), 7.65 (d,  $J = 9.0$  Hz, 2H), 7.60 (d,  $J = 7.5$  Hz, 1H), 7.56 (dd,  $J = 2.0, 8.0$  Hz, 1H), 7.51 (t,  $J = 7.5$  Hz, 1H), 7.43 (dt,  $J = 2.0, 7.5$  Hz, 1H), 7.36 (d,  $J = 8.0$  Hz, 1H), 7.26 (t,  $J = 7.5$  Hz, 1H), 7.13 (dd,  $J = 1.0, 7.5$  Hz, 1H), 6.51 (d,  $J = 2.0$  Hz, 1H), 6.30 (s, 1H), 3.97 (s, 3H), 1.96 (s, 3H);  $^{13}\text{C}$  NMR (125

MHz, CDCl<sub>3</sub>) <sup>13</sup>C NMR (126 MHz, DMSO) δ 166.76, 149.95, 144.47, 140.03, 138.22, 136.37, 135.99, 133.09, 133.02, 131.48, 130.97, 130.90, 130.25, 129.13, 129.08, 128.81, 128.22, 127.81, 127.67, 127.47, 125.80, 124.02, 121.30, 52.32, 19.21. HRMS (ESI-TOF) *m/z* Calcd for C<sub>27</sub>H<sub>21</sub>N<sub>2</sub>O<sub>6</sub>S [M-H]<sup>-</sup>: 501.1126. found: 501.1128.

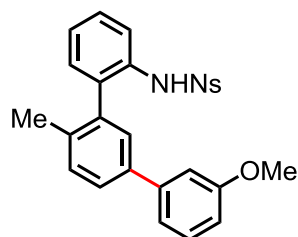

**N-(3''-methoxy-6'-methyl-[1,1':3',1''-terphenyl]-2-yl)-4-nitrobenzenesulfonamide 5f**

<sup>1</sup>H NMR (500 MHz, CDCl<sub>3</sub>) δ 7.91 (d, *J* = 8.5 Hz, 2H), 7.83 (d, *J* = 8.5 Hz, 1H), 7.61 (d, *J* = 8.5 Hz, 2H), 7.50 (dd, *J* = 1.5, 8.0 Hz, 1H), 7.42 (t, *J* = 7.5 Hz, 1H), 7.34-7.31 (m, 2H), 7.24 (t, *J* = 7.5 Hz, 1H), 7.12 (d, *J* = 6.5 Hz, 1H), 6.95-6.91 (m, 2H), 6.88 (s, 1H), 6.38 (s, 1H), 3.87 (s, 3H), 1.96 (s, 3H); <sup>13</sup>C NMR (125 MHz, CDCl<sub>3</sub>) δ 160.11, 150.01, 144.39, 141.23, 139.15, 136.07, 135.46, 133.38, 133.05, 131.28, 130.15, 130.04, 128.98, 128.15, 127.88, 127.43, 125.79, 124.03, 121.45, 118.99, 113.05, 112.37, 55.29, 19.17. HRMS (ESI-TOF) *m/z* Calcd for C<sub>26</sub>H<sub>21</sub>N<sub>2</sub>O<sub>5</sub>S [M-H]<sup>-</sup>: 473.1177. found: 473.1189.

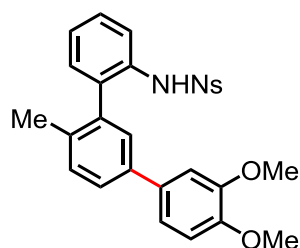

**N-(3'',4''-dimethoxy-6'-methyl-[1,1':3',1''-terphenyl]-2-yl)-4-nitrobenzenesulfonamide 5g**

<sup>1</sup>H NMR (400 MHz, CDCl<sub>3</sub>) δ 7.92 (d, *J* = 8.8 Hz, 2H), 7.81 (d, *J* = 8.4 Hz, 1H), 7.63 (d, *J* = 8.8 Hz, 2H), 7.48 (dd, *J* = 1.6, 8.0 Hz, 1H), 7.42 (t, *J* = 7.2 Hz, 1H), 7.31 (d, *J* = 8.0 Hz, 1H), 7.25 (t, *J* = 7.6 Hz, 1H), 7.13 (d, *J* = 7.6 Hz, 1H), 6.97 (s, 1H), 6.90 (d, *J* = 8.4 Hz, 1H), 6.84 (dd, *J* = 1.6, 8.0 Hz, 1H), 6.39 (s, 1H), 6.30 (s, 1H), 3.97 (s, 3H), 3.95 (s, 3H), 1.92 (s, 3H); <sup>13</sup>C NMR (100 MHz, CDCl<sub>3</sub>) δ 149.99, 149.37, 149.01, 144.42, 139.20, 136.02, 134.75, 133.40, 133.06, 132.64, 131.25, 130.18, 128.94, 128.18, 127.49, 127.13, 125.73, 124.02, 121.34, 118.95, 111.56, 109.96, 56.04, 56.00, 19.12. HRMS (ESI-TOF) *m/z* Calcd for C<sub>27</sub>H<sub>23</sub>N<sub>2</sub>O<sub>6</sub>S [M-H]<sup>-</sup>: 503.1282. found: 503.1285.

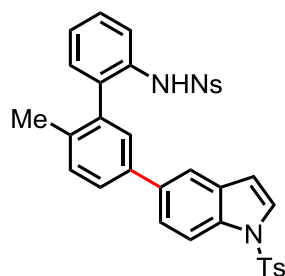

**N-(2'-methyl-5'-(1-tosyl-1H-indol-6-yl)-[1,1'-biphenyl]-2-yl)-4-nitrobenzenesulfonamide 5h**

$^1\text{H}$  NMR (500 MHz,  $\text{CDCl}_3$ )  $\delta$  8.04 (d,  $J = 8.5$  Hz, 1H), 7.86-7.83 (m, 4H), 7.78 (d,  $J = 8.5$  Hz, 1H), 7.63-7.61 (m, 3H), 7.52-7.50 (m, 2H), 7.40-7.35 (m, 2H), 7.32 (d,  $J = 8.0$  Hz, 1H), 7.26-7.23 (m, 4H), 7.11 (dd,  $J = 1.5, 7.5$  Hz, 1H), 6.67 (d,  $J = 3.5$  Hz, 1H), 6.54 (s, 1H), 6.35 (s, 1H), 2.32 (s, 3H), 1.92 (s, 3H);  $^{13}\text{C}$  NMR (125 MHz,  $\text{CDCl}_3$ )  $\delta$  149.95, 145.00, 144.42, 139.43, 136.13, 135.27, 135.22, 135.02, 134.38, 133.27, 133.01, 131.40, 131.35, 130.26, 129.90, 128.94, 128.22, 127.88, 127.66, 127.29, 126.92, 125.71, 123.91, 123.50, 121.14, 119.26, 113.93, 108.94, 21.53, 19.11. HRMS (ESI-TOF)  $m/z$  Calcd for  $\text{C}_{34}\text{H}_{26}\text{N}_3\text{O}_6\text{S}_2$   $[\text{M}-\text{H}]^-$ : 636.1269. found: 636.1279.

**3.5 General Procedure for *meta*-C(sp<sup>2</sup>)-H Arylation of  $\beta$ -Aryl Dipeptides **6** (Tables 5).**

The starting material **6** (0.10 mmol),  $\text{Pd}(\text{OAc})_2$  (0.01 mmol, 2.2 mg), and  $\text{AgOAc}$  (0.30 mmol, 50.0 mg) were weighed in air and placed in a sealed tube (10 mL) with a magnetic stir bar. To the reaction mixture, 4-acetylpyridine (0.02 mmol, 2.2  $\mu\text{L}$ ), norbornene (0.02 mmol, 1.9 mg), aryl iodide **2** (0.3 mmol), and TBME (1.0 mL) were added. The reaction mixture was heated to 80  $^\circ\text{C}$  for 24 hours under vigorous stirring. Upon completion, the reaction mixture was cooled to room temperature, diluted with ethyl acetate, and filtered through a pad of celite. The filtrate was concentrated *in vacuo*, and the resulting residue purified by preparative TLC using an eluent of hexanes/ethyl acetate (2/1 to 4/1) to give the desired products **7**.

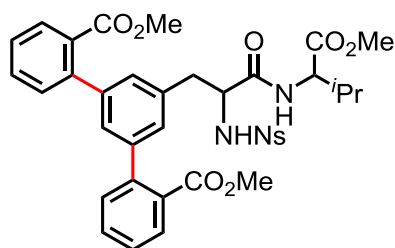

### dimethyl

#### 5'-(3-((1-methoxy-3-methyl-1-oxobutan-2-yl)amino)-2-(4-nitrophenylsulfonamido)-3-oxopropyl)-[1,1':3',1''-terphenyl]-2,2''-dicarboxylate 7a(di)

<sup>1</sup>H NMR (500 MHz, CDCl<sub>3</sub>) δ 8.16 (d, *J* = 9.0 Hz, 2H), 7.94 (d, *J* = 9.0 Hz, 2H), 7.90 (d, *J* = 7.0 Hz, 2H), 7.52 (t, *J* = 7.5 Hz, 2H), 7.42 (t, *J* = 7.0 Hz, 2H), 7.25 (d, *J* = 7.5 Hz, 2H), 7.18 (s, 1H), 6.99 (d, *J* = 1.0 Hz, 2H), 6.82 (d, *J* = 8.5 Hz, 1H), 5.91 (d, *J* = 6.0 Hz, 1H, N-H), 4.34-4.32 (m, 1H), 4.06-4.02 (m, 1H), 3.79 (s, 6H), 3.64 (s, 3H), 3.13-3.04 (m, 2H), 2.04-2.00 (m, 1H), 0.79 (d, *J* = 6.5 Hz, 3H), 0.77 (d, *J* = 7.0 Hz, 3H); <sup>13</sup>C NMR (125 MHz, CDCl<sub>3</sub>) δ 171.78, 169.69, 168.53, 149.94, 145.00, 141.84, 141.43, 133.97, 131.66, 130.65, 130.35, 129.96, 128.63, 128.57, 127.62, 124.19, 58.75, 57.41, 52.31, 52.03, 39.24, 31.05, 18.71, 17.74. HRMS (ESI-TOF) *m/z* Calcd for C<sub>37</sub>H<sub>36</sub>N<sub>3</sub>O<sub>11</sub>S [M-H]<sup>-</sup>: 730.2076. found: 730.2075.

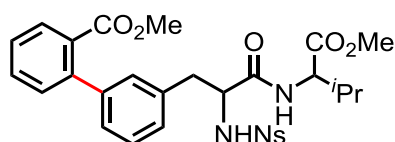

### methyl

#### 3'-(3-((1-methoxy-3-methyl-1-oxobutan-2-yl)amino)-2-(4-nitrophenylsulfonamido)-3-oxopropyl)-[1,1'-biphenyl]-2-carboxylate 7a(mono)

<sup>1</sup>H NMR (500 MHz, CDCl<sub>3</sub>) δ 8.17 (d, *J* = 9.0 Hz, 2H), 7.96 (d, *J* = 7.5 Hz, 1H), 8.87 (d, *J* = 8.5 Hz, 2H), 7.56 (t, *J* = 7.5 Hz, 1H), 7.45 (t, *J* = 7.5 Hz, 1H), 7.30 (d, *J* = 7.5 Hz, 1H), 7.18 (d, *J* = 7.5 Hz, 1H), 7.13-7.09 (m, 2H), 6.87 (d, *J* = 7.5 Hz, 1H), 6.76 (d, *J* = 8.5 Hz, 1H), 5.68 (d, *J* = 6.5 Hz, N-H), 4.37-4.35 (m, 1H), 3.99-3.94 (m, 1H), 3.85 (s, 3H), 3.70 (s, 3H), 3.12 (dd, *J* = 7.0, 14.0 Hz, 1H), 2.95 (dd, *J* = 8.0, 14.0 Hz, 1H), 2.08-2.02 (m, 1H), 0.83 (d, *J* = 7.0 Hz, 3H), 0.79 (d, *J* = 7.0 Hz, 3H); <sup>13</sup>C NMR (125 MHz, CDCl<sub>3</sub>) δ 171.83, 169.64, 168.31, 149.96, 144.63, 142.45, 141.51, 134.36, 131.92, 130.85, 130.56, 130.36, 129.45, 128.82, 128.57, 127.60, 127.50, 127.33, 124.20, 58.86, 57.37, 52.41, 52.13, 39.24, 31.14, 18.77, 17.61. HRMS (ESI-TOF) *m/z* Calcd for C<sub>29</sub>H<sub>30</sub>N<sub>3</sub>O<sub>9</sub>S [M-H]<sup>-</sup>: 596.1708. found: 596.1710.

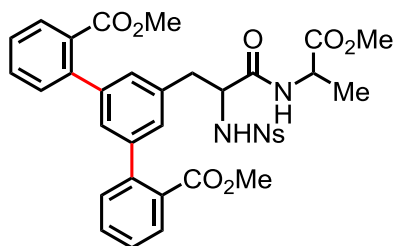

### dimethyl

#### 5'-(3-((1-methoxy-1-oxopropan-2-yl)amino)-2-(4-nitrophenylsulfonamido)-3-oxopropyl)-[1,1':3',1''-terphenyl]-2,2''-dicarboxylate 7b(di)

$^1\text{H}$  NMR (500 MHz,  $\text{CDCl}_3$ )  $\delta$  8.20 (d,  $J = 9.0$  Hz, 2H), 7.99 (d,  $J = 8.5$  Hz, 2H), 7.89 (dd,  $J = 1.5$ , 8.0 Hz, 2H), 7.52 (dt,  $J = 1.5$ , 7.5 Hz, 2H), 7.42 (dt,  $J = 1.5$ , 7.5 Hz, 2H), 7.28 (dd,  $J = 1.5$ , 7.5 Hz, 2H), 7.11 (s, 1H), 7.00 (d,  $J = 1.5$  Hz, 2H), 6.75 (d,  $J = 7.5$  Hz, 1H, N-H), 6.10 (d,  $J = 7.5$  Hz, 1H, N-H), 4.35-4.32 (m, 1H), 4.17-4.14 (m, 1H), 3.75 (s, 6H), 3.60 (s, 3H), 3.25 (dd,  $J = 5.0$ , 14.0 Hz, 1H), 2.98 (dd,  $J = 7.0$ , 14.0 Hz, 1H), 1.15 (d,  $J = 7.5$  Hz, 3H);  $^{13}\text{C}$  NMR (125 MHz,  $\text{CDCl}_3$ )  $\delta$  172.40, 169.17, 168.50, 149.98, 145.68, 142.05, 141.44, 133.97, 131.65, 130.75, 130.24, 129.91, 128.72, 128.46, 127.57, 124.24, 58.04, 52.37, 52.25, 48.33, 38.88, 17.81. HRMS (ESI-TOF)  $m/z$  Calcd for  $\text{C}_{35}\text{H}_{32}\text{N}_3\text{O}_{11}\text{S}$  [M-H] $^-$ : 702.1763. found: 702.1769.

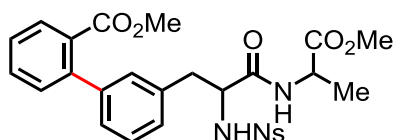

### methyl

#### 3'-(3-((1-methoxy-1-oxopropan-2-yl)amino)-2-(4-nitrophenylsulfonamido)-3-oxopropyl)-[1,1'-biphenyl]-2-carboxylate 7b(mono)

$^1\text{H}$  NMR (500 MHz,  $\text{CDCl}_3$ )  $\delta$  8.19 (d,  $J = 8.5$  Hz, 2H), 7.93-7.90 (m, 3H), 7.55 (dt,  $J = 1.5$ , 7.5 Hz, 1H), 7.44 (dt,  $J = 1.5$ , 8.0 Hz, 1H), 7.29 (d,  $J = 7.5$  Hz, 1H), 7.15 (d,  $J = 5.0$  Hz, 2H), 7.06 (s, 1H), 6.95-6.93 (m, 1H), 6.72 (d,  $J = 7.0$  Hz, 1H, N-H), 5.91 (d,  $J = 7.5$  Hz, 1H, N-H), 4.41-4.38 (m, 1H), 4.08-4.03 (m, 1H), 3.78 (s, 3H), 3.68 (s, 3H), 3.05 (d,  $J = 6.5$  Hz, 2H), 1.24 (d,  $J = 7.0$  Hz, 3H);  $^{13}\text{C}$  NMR (125 MHz,  $\text{CDCl}_3$ )  $\delta$  172.45, 169.29, 168.39, 149.96, 145.27, 141.51, 134.41, 131.79, 130.79, 130.35, 130.05, 129.59, 128.60, 128.44, 127.93, 127.54, 127.31, 124.22, 58.24, 52.47, 52.30, 48.32, 38.94, 17.97. HRMS (ESI-TOF)  $m/z$  Calcd for  $\text{C}_{27}\text{H}_{26}\text{N}_3\text{O}_9\text{S}$  [M-H] $^-$ : 568.1395. found: 568.1395.



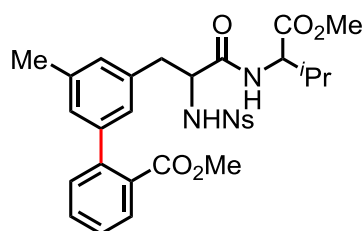

**methyl**

**3'-((1-methoxy-3-methyl-1-oxobutan-2-yl)amino)-2-(4-nitrophenylsulfonamido)-3-oxopropyl)-5'-methyl-[1,1'-biphenyl]-2-carboxylate 7c**

$^1\text{H NMR}$  (500 MHz,  $\text{CDCl}_3$ )  $\delta$  8.16 (d,  $J = 9.0$  Hz, 2H), 7.93 (d,  $J = 7.5$  Hz, 1H), 7.87 (d,  $J = 9.0$  Hz, 2H), 7.55 (t,  $J = 8.0$  Hz, 1H), 7.43 (t,  $J = 7.5$  Hz, 1H), 7.31 (d,  $J = 8.0$  Hz, 1H), 7.00 (s, 1H), 6.90 (s, 1H), 6.81 (d,  $J = 8.5$  Hz, 1H), 6.69 (s, 1H), 5.79 (d,  $J = 6.5$  Hz, N-H), 4.39-4.36 (m, 1H), 3.95-3.91 (m, 1H), 3.85 (s, 3H), 3.70 (s, 3H), 3.07 (dd,  $J = 7.0, 14.0$  Hz, 1H), 2.89 (dd,  $J = 8.0, 14.0$  Hz, 1H), 2.16 (s, 3H), 2.08-2.04 (m, 1H), 0.84 (d,  $J = 7.0$  Hz, 3H), 0.78 (d,  $J = 7.0$  Hz, 3H);  $^{13}\text{C NMR}$  (125 MHz,  $\text{CDCl}_3$ )  $\delta$  171.80, 169.74, 168.38, 149.87, 144.61, 141.43, 138.61, 134.36, 131.80, 130.75, 130.43, 129.54, 128.59, 128.29, 128.10, 127.45, 127.44, 124.02, 59.01, 57.33, 52.37, 52.09, 39.16, 31.13, 21.06, 18.66, 17.49. HRMS (ESI-TOF)  $m/z$  Calcd for  $\text{C}_{30}\text{H}_{32}\text{N}_3\text{O}_9\text{S}$   $[\text{M}-\text{H}]^-$ : 610.1865. found: 610.1863.

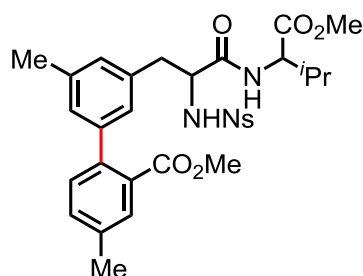

**methyl**

**3'-((1-methoxy-3-methyl-1-oxobutan-2-yl)amino)-2-(4-nitrophenylsulfonamido)-3-oxopropyl)-4,5'-dimethyl-[1,1'-biphenyl]-2-carboxylate 7d**

$^1\text{H NMR}$  (500 MHz,  $\text{CDCl}_3$ )  $\delta$  8.15 (d,  $J = 8.5$  Hz, 2H), 7.86 (d,  $J = 8.5$  Hz, 2H), 7.73 (s, 1H), 7.35 (d,  $J = 7.5$  Hz, 1H), 7.19 (d,  $J = 7.5$  Hz, 1H), 6.97 (s, 1H), 6.86 (s, 1H), 6.82 (d,  $J = 9.0$  Hz, 1H), 6.66 (s, 1H), 5.78 (d,  $J = 6.0$  Hz, N-H), 4.39-4.37 (m, 1H), 3.94-3.90 (m, 1H), 3.85 (s, 3H), 3.70 (s, 3H), 3.07 (dd,  $J = 7.0, 14.0$  Hz, 1H), 2.88 (dd,  $J = 8.0, 14.0$  Hz, 1H), 2.44 (s, 3H), 2.15 (s, 3H), 2.09-2.03 (m, 1H), 0.85 (d,  $J = 7.0$  Hz, 3H), 0.79 (d,  $J = 7.0$  Hz, 3H);  $^{13}\text{C NMR}$  (125 MHz,  $\text{CDCl}_3$ )  $\delta$  171.84, 169.78, 168.57, 149.86, 144.56, 141.39, 139.58, 138.55, 137.41, 134.32, 132.52, 130.90, 130.63, 129.36, 128.59, 128.14, 128.10, 127.42, 124.03, 58.99, 57.32, 52.31, 52.09, 39.11, 31.13, 21.05, 20.92, 18.67, 17.49. HRMS (ESI-TOF)  $m/z$  Calcd for  $\text{C}_{31}\text{H}_{34}\text{N}_3\text{O}_9\text{S}$   $[\text{M}-\text{H}]^-$ : 624.2021.

found: 624.2022.

### 3.6 General Procedure for *meta*-C(sp<sup>2</sup>)-H Arylation of Benzylamine **8** (Scheme 2).

Benzylamine **8** (0.10 mmol), Pd(OAc)<sub>2</sub> (0.01 mmol, 2.2 mg), and AgOAc (0.30 mmol, 50.0 mg) were weighed in air and placed in a sealed tube (10 mL) with a magnetic stir bar. To the reaction mixture, pyridine (0.02 mmol, 1.6 μL), norbornene (0.15 mmol, 14.0 mg), aryl iodide **2** (0.3 mmol), and TBME (1.0 mL) were added. The reaction mixture was heated to 80 °C for 24 hours under vigorous stirring. Upon completion, the reaction mixture was cooled to room temperature, diluted with ethyl acetate, and filtered through a pad of celite. The filtrate was concentrated *in vacuo*, and the resulting residue purified by preparative TLC using an eluent of hexanes/ethyl acetate(2/1 to 4/1) to give the desired products **9**.

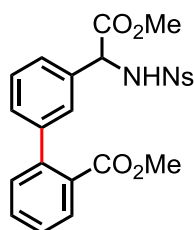

**methyl**

**3'-(2-methoxy-1-(4-nitrophenylsulfonamido)-2-oxoethyl)-[1,1'-biphenyl]-2-carboxylate**

**9a(mono)**

<sup>1</sup>H NMR (400 MHz, CDCl<sub>3</sub>) δ 8.14 (d, *J* = 8.8 Hz, 2H), 7.82 (d, *J* = 8.0 Hz, 3H), 7.51 (t, *J* = 7.6 Hz, 1H), 7.41 (t, *J* = 7.6 Hz, 1H), 7.21-7.16 (m, 3H), 7.13-7.09 (m, 2H), 6.24 (d, *J* = 6.8 Hz, 1H, N-H), 5.24 (d, *J* = 6.8 Hz, 1H), 3.68 (s, 3H), 3.66 (s, 3H); <sup>13</sup>C NMR (100 MHz, CDCl<sub>3</sub>) δ 170.02, 168.40, 149.72, 146.00, 141.97, 141.21, 134.29, 131.38, 130.47, 129.92, 128.84, 128.59, 128.25, 127.60, 125.93, 123.94, 59.46, 53.29, 52.02. HRMS (ESI-TOF) *m/z* Calcd for C<sub>23</sub>H<sub>19</sub>N<sub>2</sub>O<sub>8</sub>S [M-H]<sup>-</sup>: 483.0868. found: 483.0867.

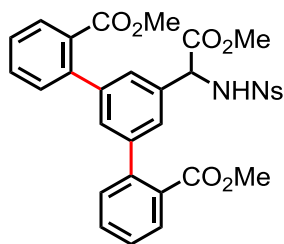

#### dimethyl

#### 5'-(2-methoxy-1-(4-nitrophenylsulfonamido)-2-oxoethyl)-[1,1':3',1''-terphenyl]-2,2''-dicarboxylate **9a(di)**

$^1\text{H}$  NMR (400 MHz,  $\text{CDCl}_3$ )  $\delta$  8.13 (d,  $J = 8.8$  Hz, 2H), 7.82-7.79 (m, 4H), 7.49 (t,  $J = 7.6$  Hz, 2H), 7.41 (t,  $J = 7.6$  Hz, 2H), 7.21 (s, 1H), 7.19 (d,  $J = 8.0$  Hz, 2H), 7.04 (s, 2H), 6.27 (d,  $J = 6.8$  Hz, 1H, N-H), 5.27 (d,  $J = 6.4$  Hz, 1H), 3.69 (s, 9H);  $^{13}\text{C}$  NMR (100 MHz,  $\text{CDCl}_3$ )  $\delta$  169.94, 168.45, 149.73, 145.98, 141.78, 140.96, 133.99, 131.35, 130.56, 130.46, 129.92, 128.86, 128.34, 127.67, 126.34, 123.98, 59.41, 53.31, 52.02. HRMS (ESI-TOF)  $m/z$  Calcd for  $\text{C}_{31}\text{H}_{25}\text{N}_2\text{O}_{10}\text{S}$   $[\text{M}-\text{H}]^-$ : 617.1235. found: 617.1236.

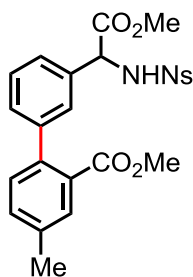

#### methyl

#### 3'-(2-methoxy-1-(4-nitrophenylsulfonamido)-2-oxoethyl)-4-methyl-[1,1'-biphenyl]-2-carboxylate **9b(mono)**

$^1\text{H}$  NMR (500 MHz,  $\text{CDCl}_3$ )  $\delta$  8.14 (d,  $J = 8.8$  Hz, 2H), 7.80 (d,  $J = 8.0$  Hz, 2H), 7.63 (s, 1H), 7.31 (d,  $J = 8.0$  Hz, 1H), 7.19 (d,  $J = 5.0$  Hz, 2H), 7.08-7.05 (m, 3H), 6.03 (d,  $J = 7.0$  Hz, 1H, N-H), 5.22 (d,  $J = 7.0$  Hz, 1H), 3.67 (s, 6H), 2.42 (s, 3H);  $^{13}\text{C}$  NMR (125 MHz,  $\text{CDCl}_3$ )  $\delta$  170.05, 168.60, 149.77, 146.06, 142.01, 138.38, 137.69, 134.20, 132.12, 130.47, 130.41, 130.29, 128.93, 128.59, 128.26, 127.67, 125.78, 123.97, 59.48, 53.35, 52.00, 20.92. HRMS (ESI-TOF)  $m/z$  Calcd for  $\text{C}_{24}\text{H}_{21}\text{N}_2\text{O}_8\text{S}$   $[\text{M}-\text{H}]^-$ : 497.1024. found: 497.1030.

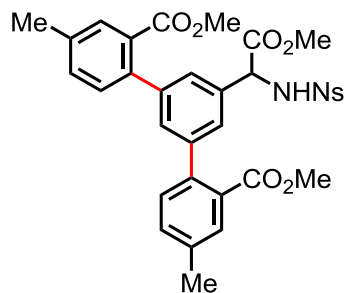

**dimethyl**

**5'-(2-methoxy-1-(4-nitrophenylsulfonamido)-2-oxoethyl)-4,4''-dimethyl-[1,1':3',1''-terphenyl]-2,2''-dicarboxylate 9b(di)**

$^1\text{H}$  NMR (500 MHz,  $\text{CDCl}_3$ )  $\delta$  8.11 (d,  $J = 8.5$  Hz, 2H), 7.80 (d,  $J = 9.0$  Hz, 2H), 7.60 (s, 2H), 7.29 (d,  $J = 9.0$  Hz, 1H), 7.16 (s, 1H), 7.07 (d,  $J = 7.5$  Hz, 2H), 6.98 (s, 2H), 6.23 (d,  $J = 5.0$  Hz, 1H, N-H), 5.26 (s, 1H), 3.69 (s, 3H), 3.68 (s, 6H), 2.41 (s, 6H);  $^{13}\text{C}$  NMR (125 MHz,  $\text{CDCl}_3$ )  $\delta$  169.99, 168.70, 149.71, 146.03, 141.69, 138.13, 137.65, 133.83, 132.04, 130.39, 130.35, 128.89, 128.32, 126.18, 123.97, 59.45, 53.27, 51.96, 20.88. HRMS (ESI-TOF)  $m/z$  Calcd for  $\text{C}_{33}\text{H}_{29}\text{N}_2\text{O}_{10}\text{S}$   $[\text{M}-\text{H}]^-$ : 645.1548. found: 645.1554.

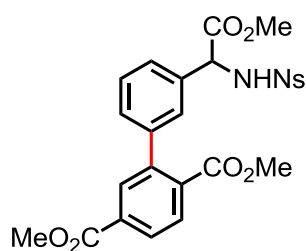

**dimethyl**

**3'-(2-methoxy-1-(4-nitrophenylsulfonamido)-2-oxoethyl)-[1,1'-biphenyl]-2,5-dicarboxylate 9c(mono)**

$^1\text{H}$  NMR (500 MHz,  $\text{CDCl}_3$ )  $\delta$  8.17 (d,  $J = 9.0$  Hz, 2H), 8.06 (dd,  $J = 1.8, 8.5$  Hz, 1H), 7.87 -7.81 (m, 4H), 7.25-7.23 (m, 2H), 7.14-7.13 (m, 2H), 6.05 (br, 1H, N-H), 5.24 (s, 1H), 3.97 (s, 3H), 3.72 (s, 3H), 3.68 (s, 3H);  $^{13}\text{C}$  NMR (125 MHz,  $\text{CDCl}_3$ )  $\delta$  169.96, 167.82, 165.91, 149.79, 145.99, 141.27, 140.98, 134.65, 134.50, 132.58, 131.39, 129.94, 128.90, 128.79, 128.55, 128.26, 128.23, 127.53, 126.41, 124.00, 59.41, 53.39, 52.56, 52.35. HRMS (ESI-TOF)  $m/z$  Calcd for  $\text{C}_{25}\text{H}_{21}\text{N}_2\text{O}_{10}\text{S}$   $[\text{M}-\text{H}]^-$ : 541.0922 found: 541.0935.

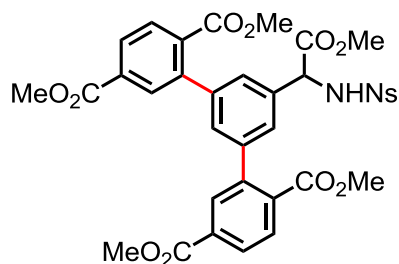

#### tetramethyl

#### 5'-(2-methoxy-1-(4-nitrophenylsulfonamido)-2-oxoethyl)-[1,1':3',1''-terphenyl]-2,2'',5,5''-tetracarboxylate 9c(di)

$^1\text{H}$  NMR (500 MHz,  $\text{CDCl}_3$ )  $\delta$  8.18 (d,  $J = 9.0$  Hz, 2H), 8.07 (dd,  $J = 1.8, 8.5$  Hz, 2H), 7.87 -7.83 (m, 6H), 7.23 (s, 1H), 7.11 (s, 2H), 6.05 (br, 1H, N-H), 5.28 (s, 1H), 3.97 (s, 6H), 3.76 (s, 6H), 3.72 (s, 3H), 2.63 (s, 1H);  $^{13}\text{C}$  NMR (125 MHz,  $\text{CDCl}_3$ )  $\delta$  169.85, 167.81, 165.83, 149.86, 145.92, 141.01, 140.85, 134.70, 134.59, 132.65, 131.33, 130.02, 128.97, 128.74, 128.33, 126.71, 124.11, 59.31, 53.49, 52.57, 52.42. HRMS (ESI-TOF)  $m/z$  Calcd for  $\text{C}_{35}\text{H}_{29}\text{N}_2\text{O}_{14}\text{S}$   $[\text{M}-\text{H}]^-$ : 733.1345. found: 733.1344.

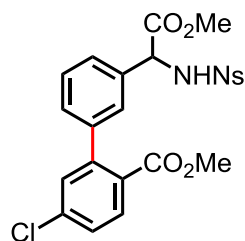

#### methyl

#### 5-chloro-3'-(2-methoxy-1-(4-nitrophenylsulfonamido)-2-oxoethyl)-[1,1'-biphenyl]-2-carboxylate 9d (mono)

$^1\text{H}$  NMR (500 MHz,  $\text{CDCl}_3$ )  $\delta$  8.19 (d,  $J = 9.0$  Hz, 2H), 7.84 (d,  $J = 9.0$  Hz, 2H), 7.81 (d,  $J = 8.0$  Hz, 1H), 7.40 (dd,  $J = 2.0, 8.5$  Hz, 1H), 7.24-7.17 (m, 3H), 7.13-7.11 (m, 2H), 6.02 (d,  $J = 6.5$  Hz, 1H, N-H), 5.23 (d,  $J = 6.5$  Hz, 1H), 3.70 (s, 3H), 3.68 (s, 3H);  $^{13}\text{C}$  NMR (125 MHz,  $\text{CDCl}_3$ )  $\delta$  169.98, 167.30, 149.87, 145.99, 143.29, 140.87, 137.61, 134.61, 131.55, 130.67, 128.90, 128.70, 128.31, 127.79, 127.52, 126.35, 124.08, 59.38, 53.42, 52.19. HRMS (ESI-TOF)  $m/z$  Calcd for  $\text{C}_{23}\text{H}_{18}\text{ClN}_2\text{O}_8\text{S}$   $[\text{M}-\text{H}]^-$ : 517.0478. found: 517.0480.

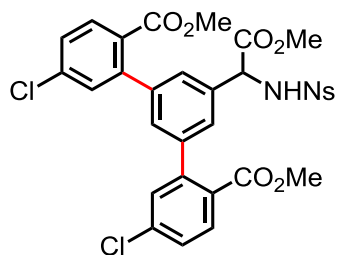

**dimethyl**

**5,5''-dichloro-5'--(2-methoxy-1-(4-nitrophenylsulfonamido)-2-oxoethyl)-[1,1':3',1''-terphenyl]-2,2''-dicarboxylate 9d(di)**

$^1\text{H}$  NMR (500 MHz,  $\text{CDCl}_3$ )  $\delta$  8.22 (d,  $J = 9.0$  Hz, 2H), 7.87 (d,  $J = 8.5$  Hz, 2H), 7.81 (d,  $J = 8.5$  Hz, 2H), 7.40 (dd,  $J = 2.0, 8.5$  Hz, 2H), 7.16-7.10 (m, 3H), 7.09 (d,  $J = 1.2$ , 2H), 6.08 (d,  $J = 6.5$  Hz, 1H, N-H), 5.27 (d,  $J = 6.5$  Hz, 1H), 3.71 (s, 6H), 3.70 (s, 3H);  $^{13}\text{C}$  NMR (125 MHz,  $\text{CDCl}_3$ )  $\delta$  169.88, 167.27, 149.92, 145.94, 142.85, 140.74, 137.68, 134.58, 131.62, 130.65, 128.93, 128.71, 128.40, 127.95, 126.62, 124.19, 59.25, 53.48, 52.23. HRMS (ESI-TOF)  $m/z$  Calcd for  $\text{C}_{31}\text{H}_{23}\text{Cl}_2\text{N}_2\text{O}_{10}\text{S}$   $[\text{M}-\text{H}]^-$ : 685.0456. found: 685.685.0452.

### 3.7 Procedure for deprotection (Scheme 4).

4-Methoxybenzenethiol (PMP-SH, 4.0 mmol, 4.0 equiv) and potassium carbonate (4.0 mmol, 4.0 equiv) were added to a solution of diarylation product **3aa** (1.0 mmol, 1.0 equiv) in MeCN (8.0 mL) and DMSO (0.3 mL). After being stirred at room temperature for 12 h the reaction mixture was diluted with EtOAc, washed with  $\text{H}_2\text{O}$  and brine, dried over anhydrous  $\text{Na}_2\text{SO}_4$ , filtered, and concentrated under vacuum. The residue was purified by column chromatography on silica gel (eluent: EtOAc/hexanes = 1: 1) to give **10** in 94% yield.

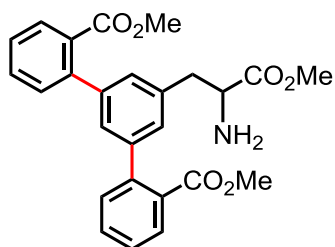

**dimethyl 5'-(2-amino-3-methoxy-3-oxopropyl)-[1,1':3',1''-terphenyl]-2,2''-dicarboxylate 10**

$^1\text{H}$  NMR (400 MHz,  $\text{CDCl}_3$ )  $\delta$  7.82 (d,  $J = 7.6$  Hz, 2H), 7.51 (t,  $J = 7.6$  Hz, 2H), 7.39 (t,  $J = 7.6$  Hz, 4H), 7.16 (s, 1H), 7.13 (s, 2H), 3.79-3.76 (m, 1H), 3.71 (s, 3H), 3.68 (s, 6H), 3.17 (dd,  $J = 5.2, 13.6$  Hz, 1H), 2.92 (dd,  $J = 8.0, 13.6$  Hz, 1H), 1.64 (br, 2H,  $\text{NH}_2$ );  $^{13}\text{C}$  NMR (100 MHz,  $\text{CDCl}_3$ )  $\delta$

175.04, 168.75, 141.88, 141.33, 136.54, 131.10, 130.75, 130.55, 129.68, 128.17, 127.15, 126.75, 55.73, 51.85, 51.84, 40.95. HRMS (ESI-TOF)  $m/z$  Calcd for  $C_{26}H_{26}NO_6$   $[M+H]^+$ : 448.1755. found: 448.1758.

### 3.8 Procedure for Application (Scheme 5).

The starting material **3da** (1.0 mmol, 57.6 mg), CuI (0.01 mmol, 1.9 mg), CsOAc (2.0 mmol, 38.4 mg), and DMSO (2 mL) were added in a sealed tube (10 mL) under  $N_2$  with a magnetic stir bar. The reaction mixture was heated to 90 °C for 36 hours with vigorous stirring. Upon completion, the reaction mixture was cooled to room temperature, diluted with ethyl acetate and saturated  $NH_4Cl$ , the organic layer was washed with brine, dried over  $Na_2SO_4$  and concentrated *in vacuo*. The residue was purified by column chromatography on silica gel using an eluent of hexanes/ethyl acetate (8/1) to give the desired product **11**.

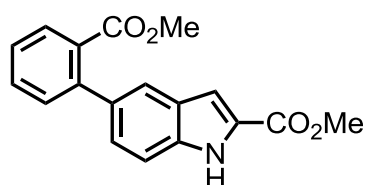

#### methyl 5-(2-(methoxycarbonyl)phenyl)-1H-indole-2-carboxylate **11**

$^1H$  NMR (500 MHz,  $CDCl_3$ )  $\delta$  9.02 (br, 1H, NH), 7.82 (dd,  $J = 1.0, 9.0$  Hz, 1H), 7.64 (s, 1H), 7.53 (dt,  $J = 1.5, 7.5$  Hz, 1H), 7.44-7.38 (m, 3H), 7.28 (dd,  $J = 1.5, 8.5$  Hz, 1H), 7.24 (d,  $J = 1.0$  Hz, 1H), 3.95 (s, 3H), 3.61 (s, 3H);  $^{13}C$  NMR (125 MHz,  $CDCl_3$ )  $\delta$  169.40, 162.33, 142.83, 136.14, 134.24, 131.17, 131.09, 129.71, 127.63, 127.47, 126.83, 126.66, 121.87, 111.38, 109.06, 52.03, 51.95. HRMS (ESI-TOF)  $m/z$  Calcd for  $C_{18}H_{16}NO_4$   $[M+H]^+$ : 310.1074. found: 310.1070.

### 4. References:

- (1) Di Gioia, M. L.; Leggio, A.; Le Pera, A.; Liguori, A.; Napoli, A.; Siciliano, C.; Sindona,

*G. J. Org. Chem.* **2003**, *68*, 7416.

(2) Yang, X.; Zhai, H.; Li, Z. *Org. Lett.* **2008**, *10*, 2457.

(3) Norsikian, S.; Beretta, M.; Cannillo, A.; Martin, A.; R., P.; Beau, J.-M. *Chem. Comm.* **2015**, *51*, 9991.

(4) Kinderman, S. S.; Wekking, M. M. T.; van Maarseveen, J. H.; Schoemaker, H. E.; Hiemstra, H.; Rutjes, F. P. J. T. *J. Org. Chem.* **2005**, *70*, 5519.

(5) Adams, R.; Werbel, L. M. *J. Am. Chem. Soc.* **1958**, *80*, 5799.

(6) Pegoraro, S.; Lang, M.; Dreker, T.; Kraus, J.; Hamm, S.; Meere, C.; Feurle, J.; Tasler, S.; Prütting, S.; Kuras, Z.; Visan, V.; Grissmer, S. *Bioorg. Med. Chem. Lett.* **2009**, *19*, 2299.

## 5. $^1\text{H}$ and $^{13}\text{C}$ NMR Spectra

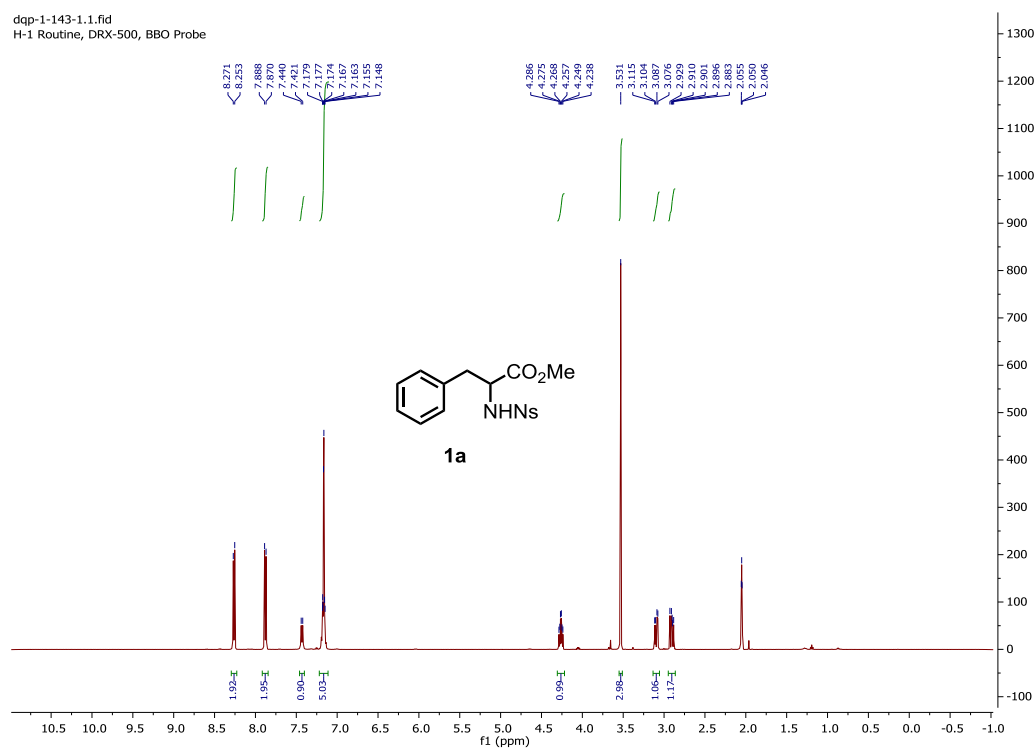



dqp-1-143-1 C.1.fid  
C-13 Routine, BBO Probe, DRX-500

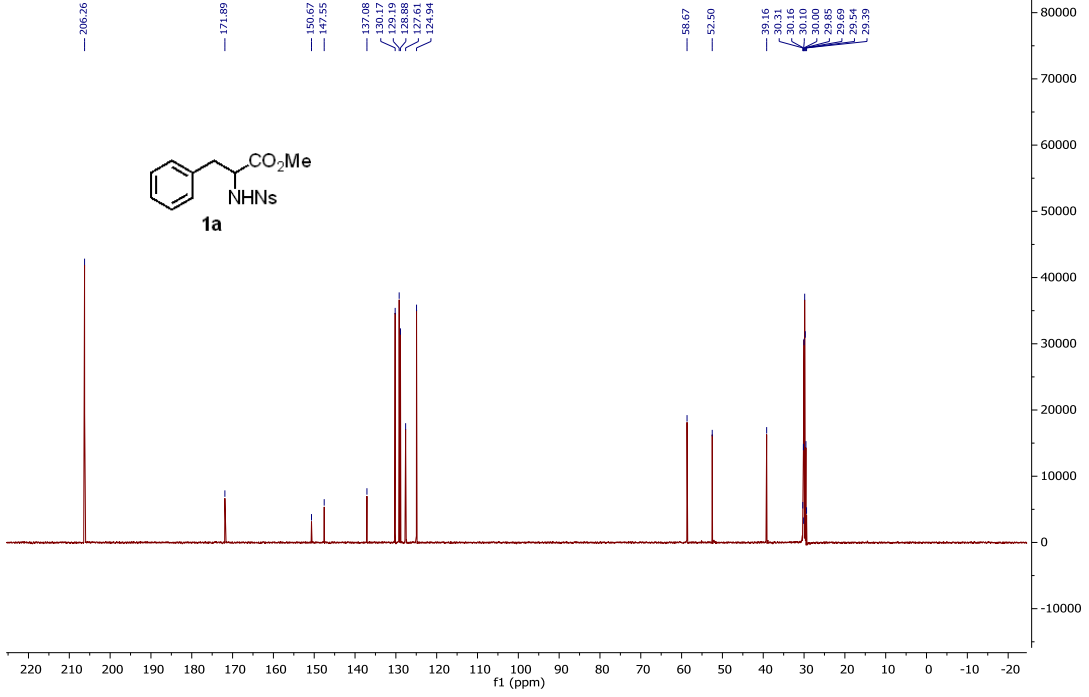

d2-129-3.1.fid

H-1 Routine, DRX-500, BBO Probe

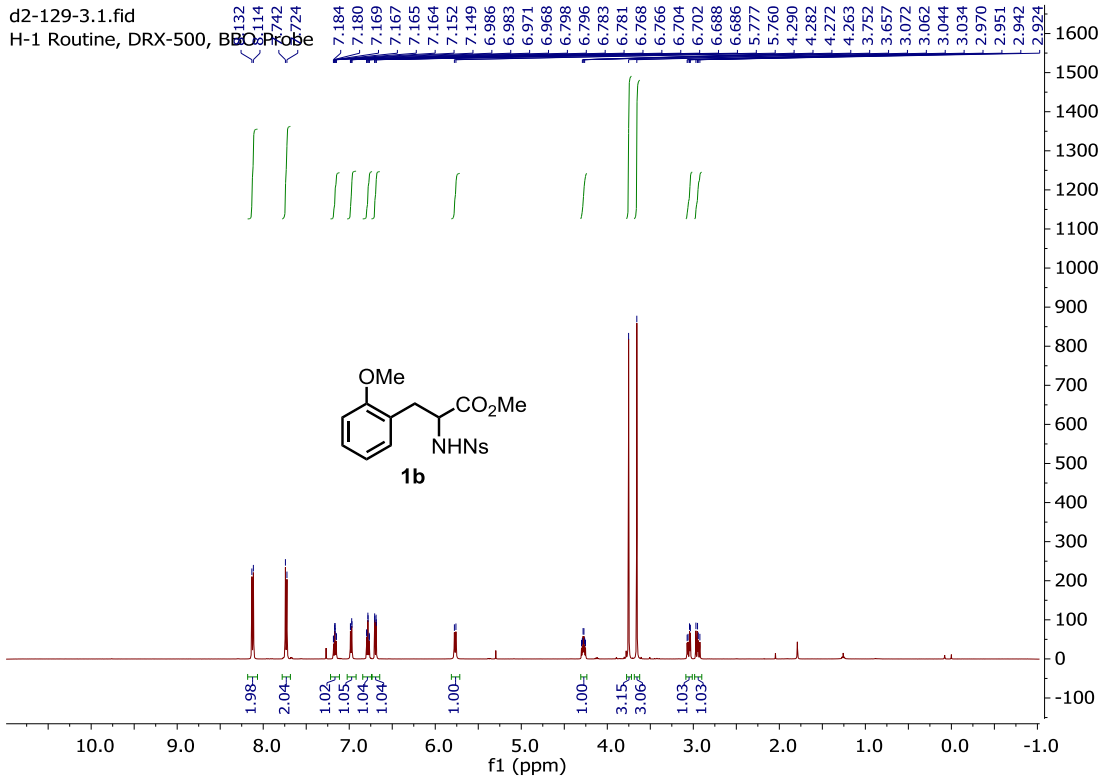

1b d2-129-3.2.fid  
C-13 Routine, BBO Probe, DRX-500

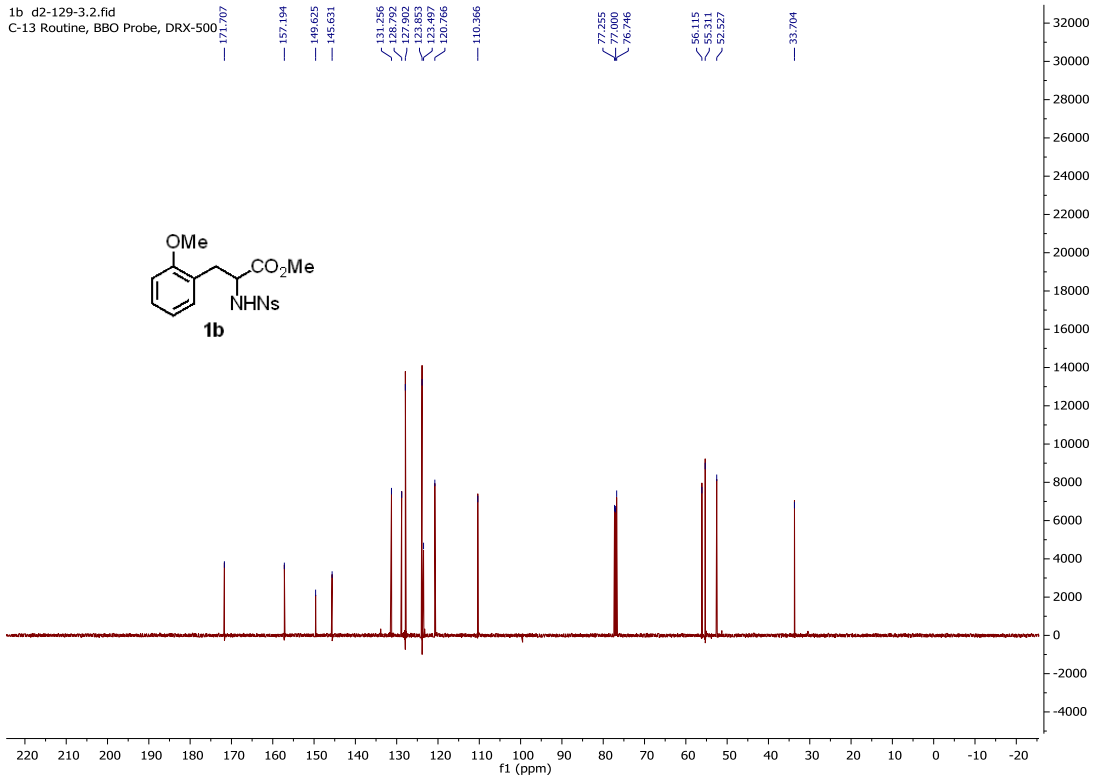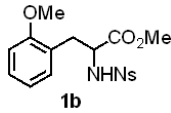

dqp-1-146-6-2pp\_01  
Std proton

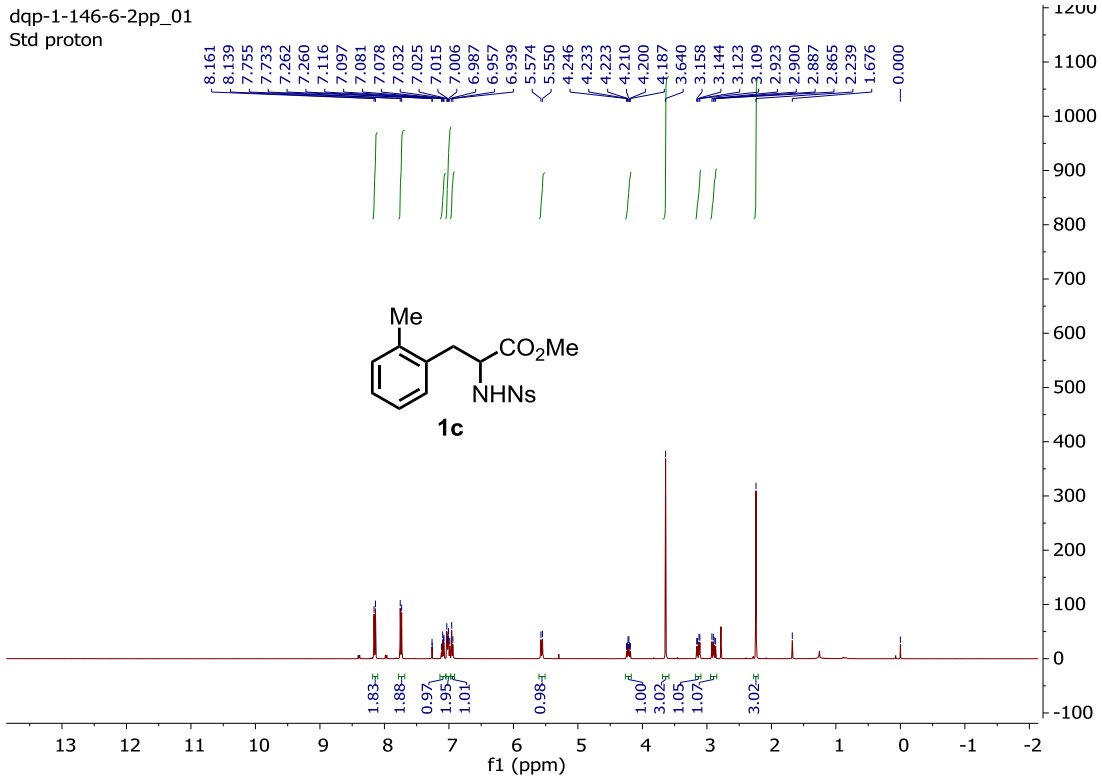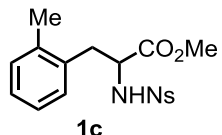

dqp-1-146-6-2pp\_C\_01  
Std proton

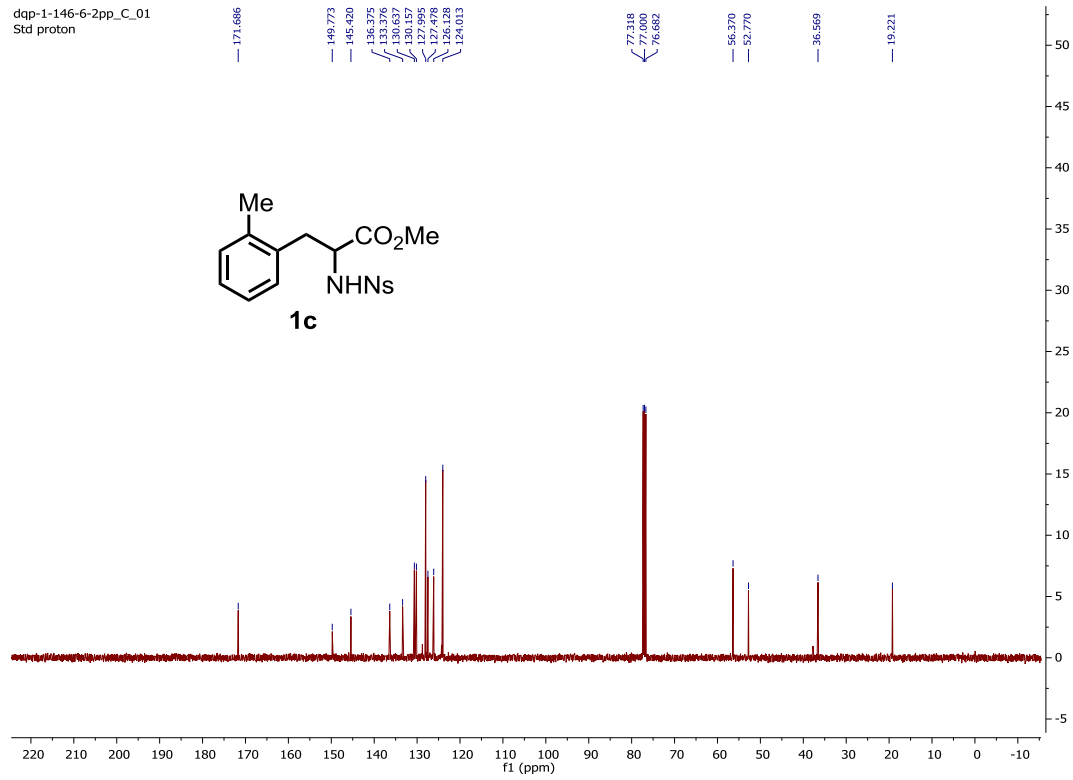

d2-29-2\_01  
Std proton

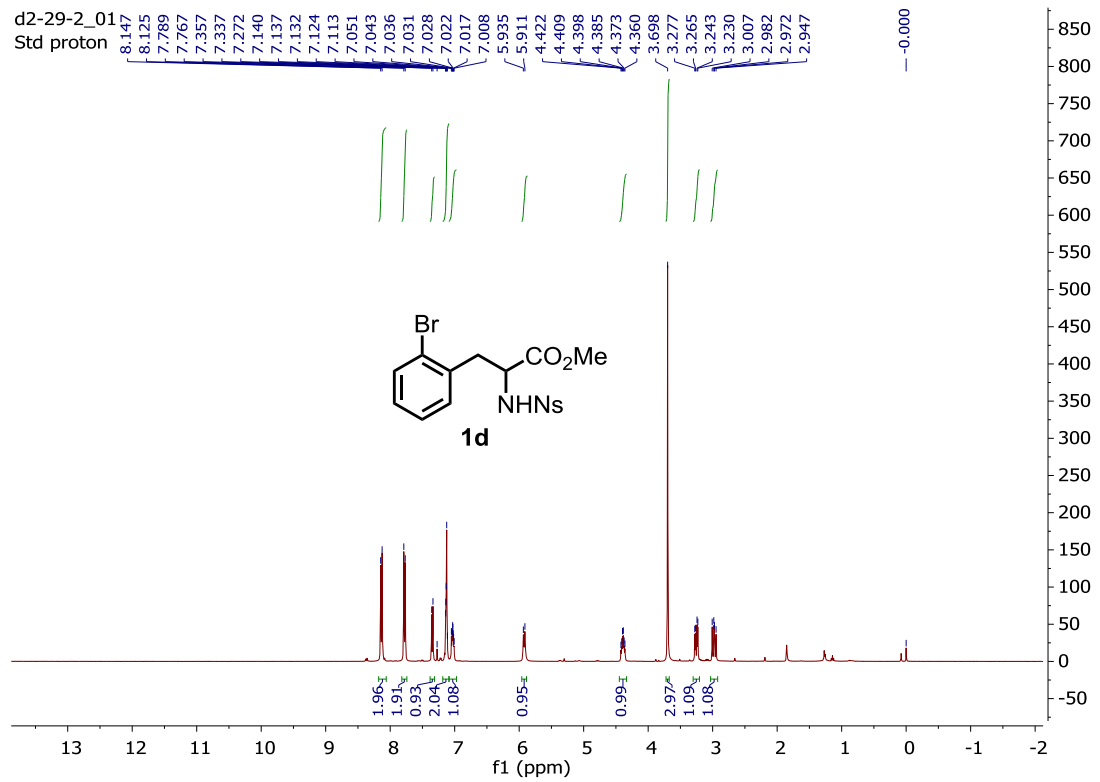

d2-29-2\_c\_01  
Std proton

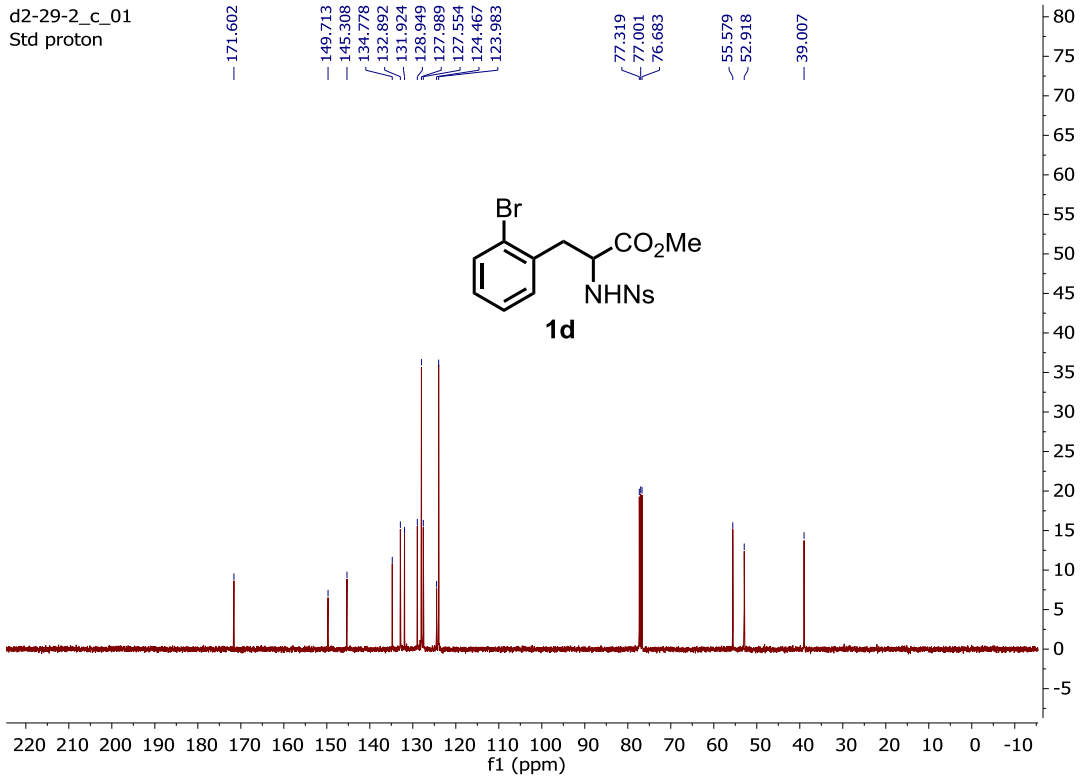

d2-22-2\_01  
Std proton

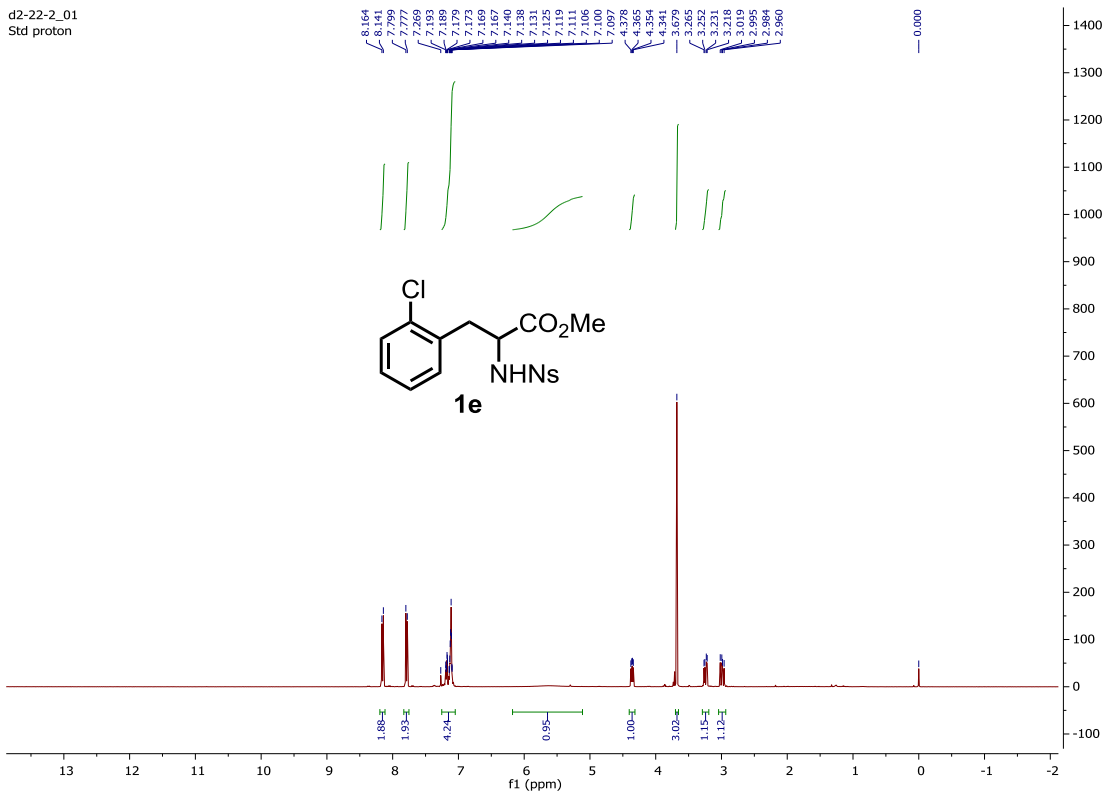

d2-22-2\_C\_01  
Std proton

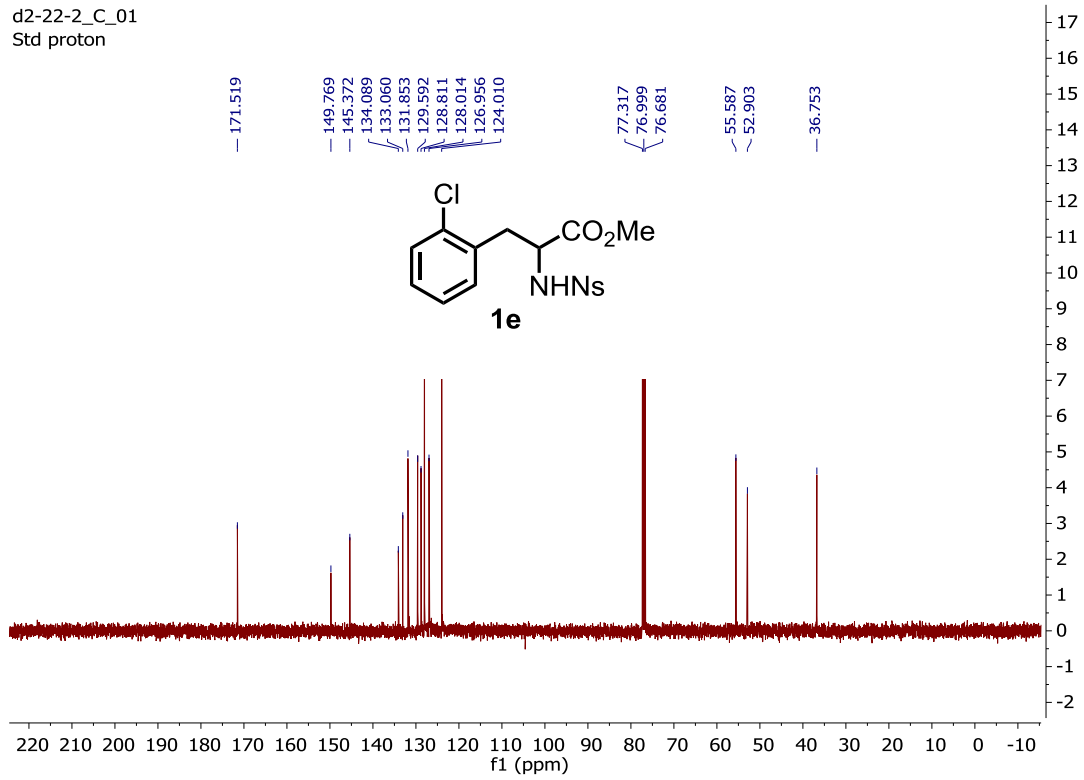

d2-13\_01  
Std proton

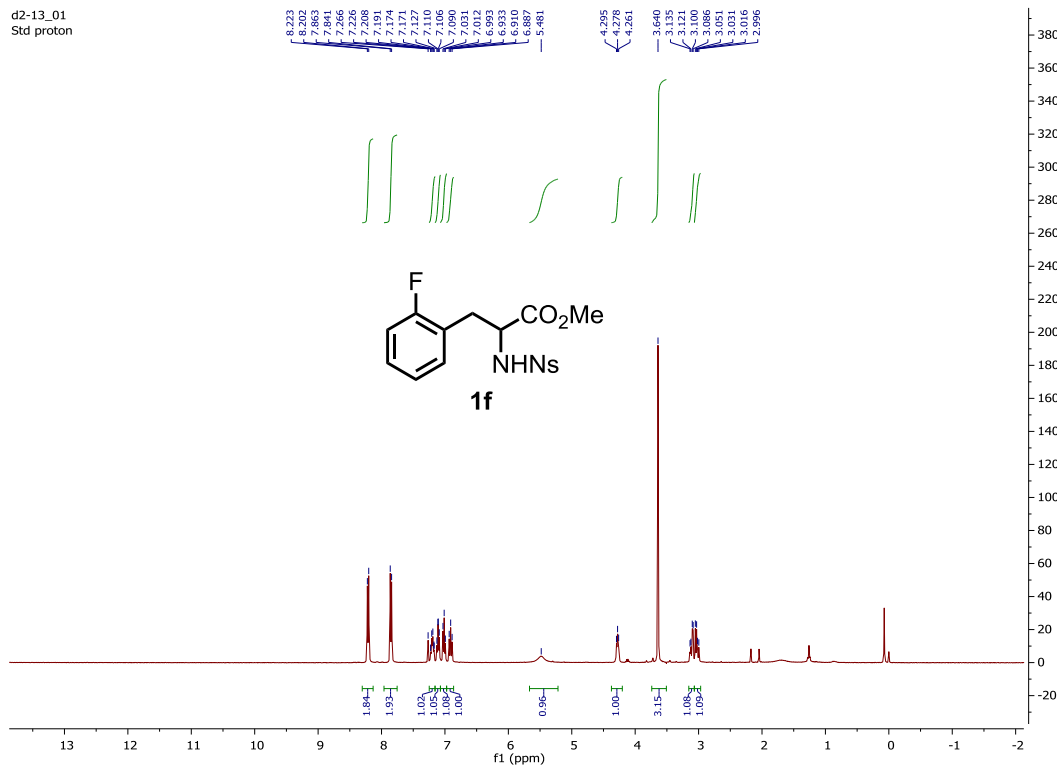

d2-13\_C\_01  
Std proton

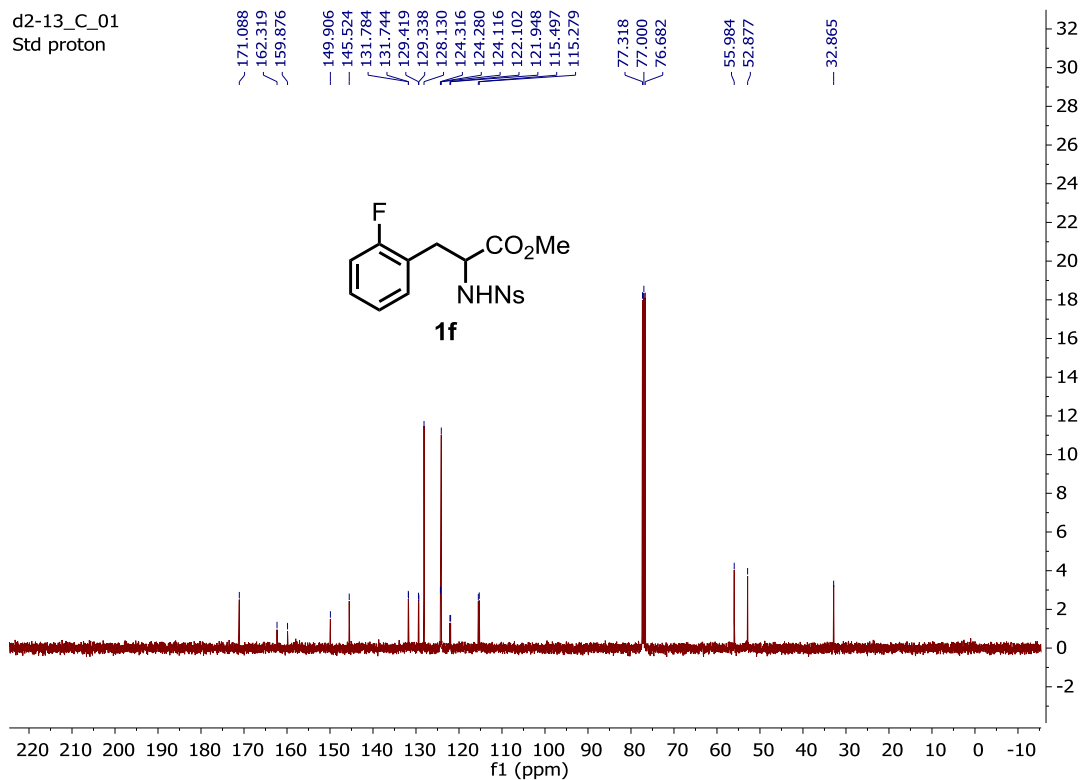

dqp-1-142-2.1.fid  
H-1 Routine, DRX-500, BBO Probe

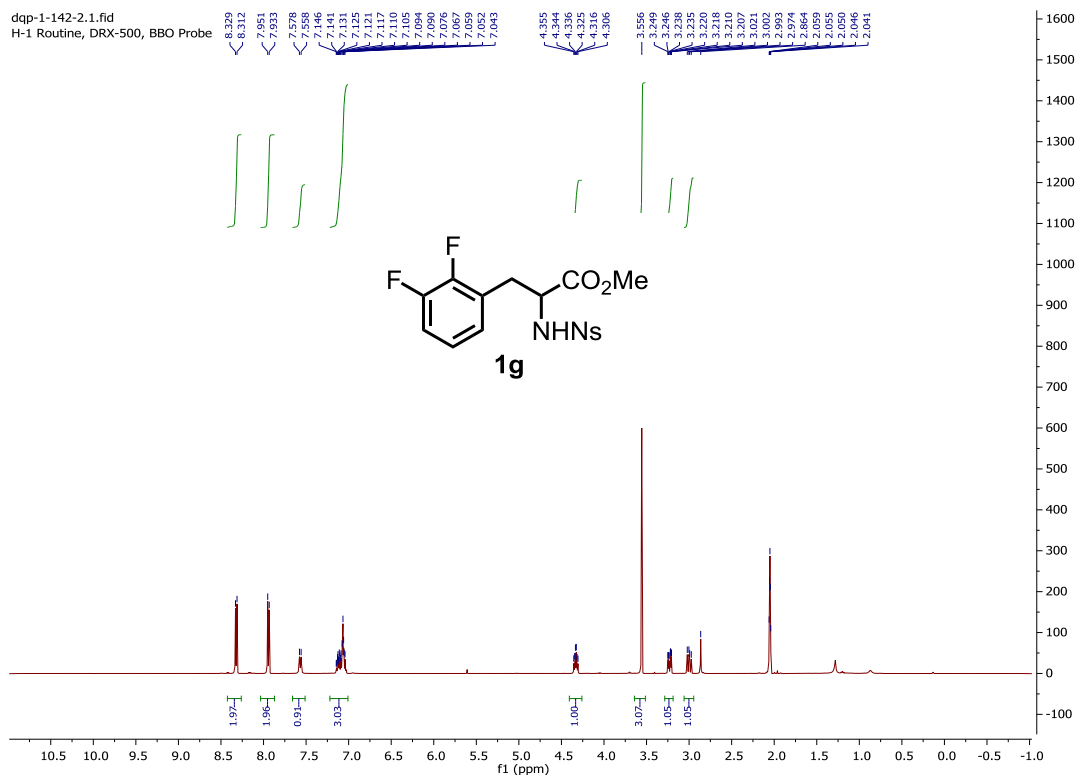

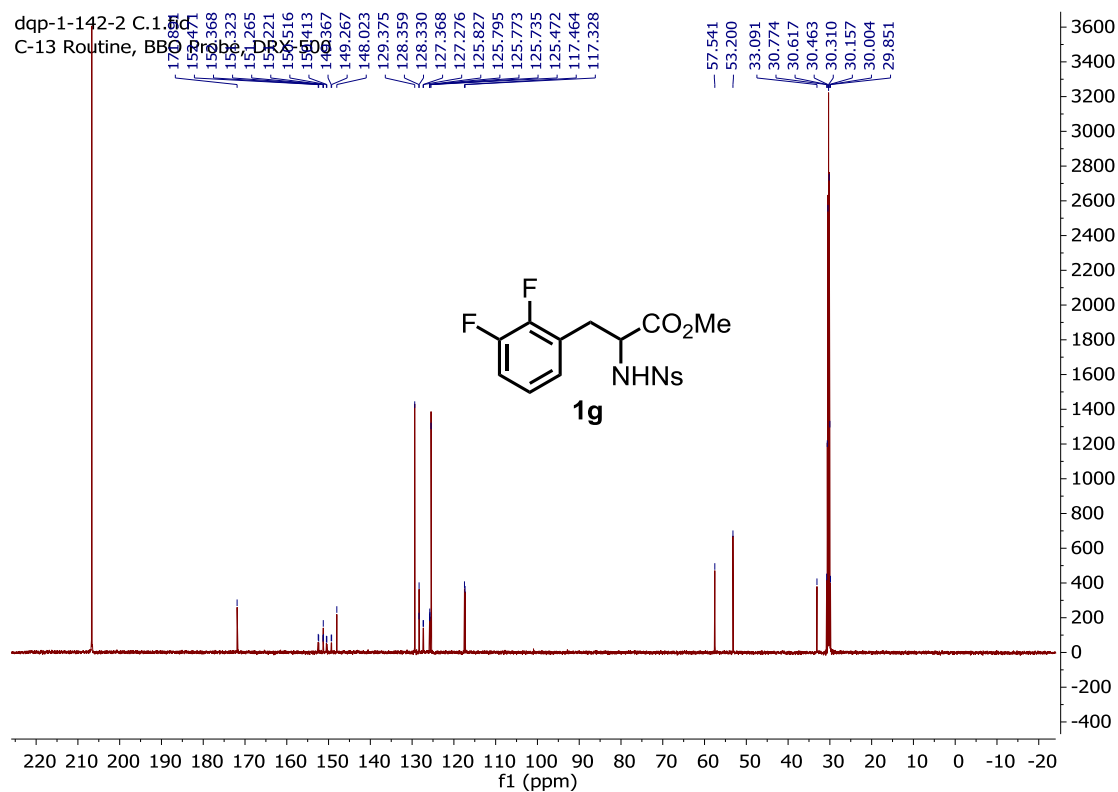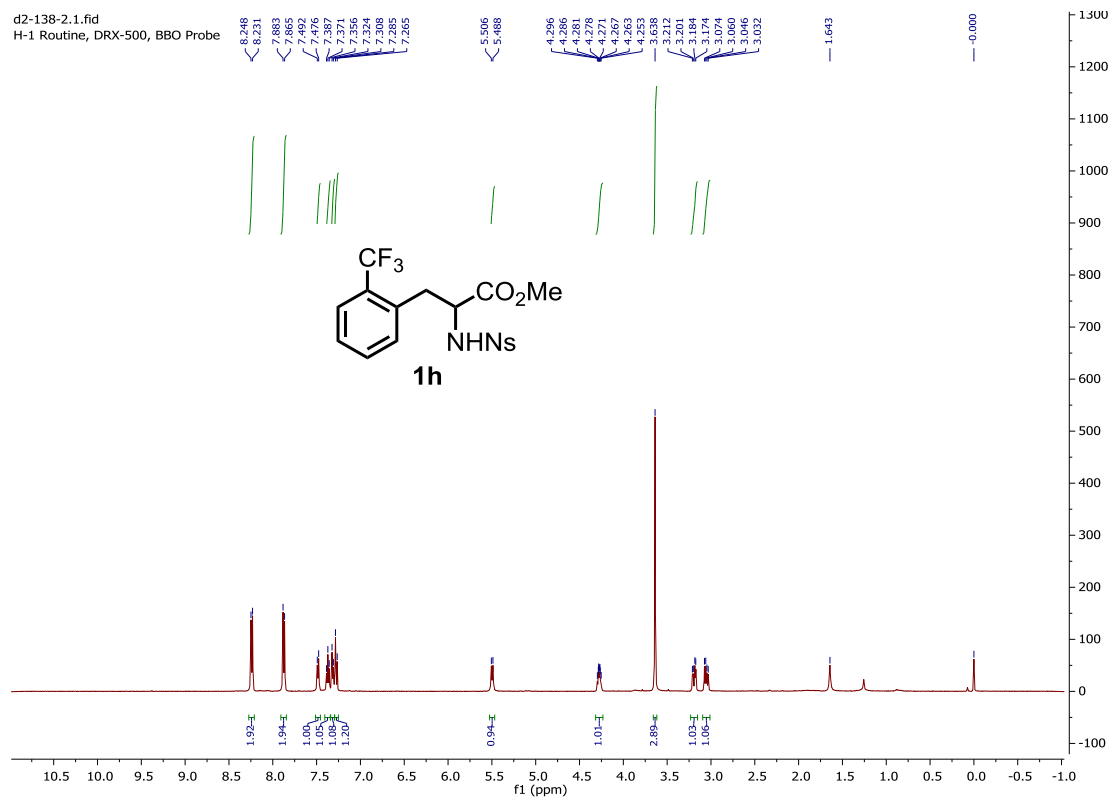

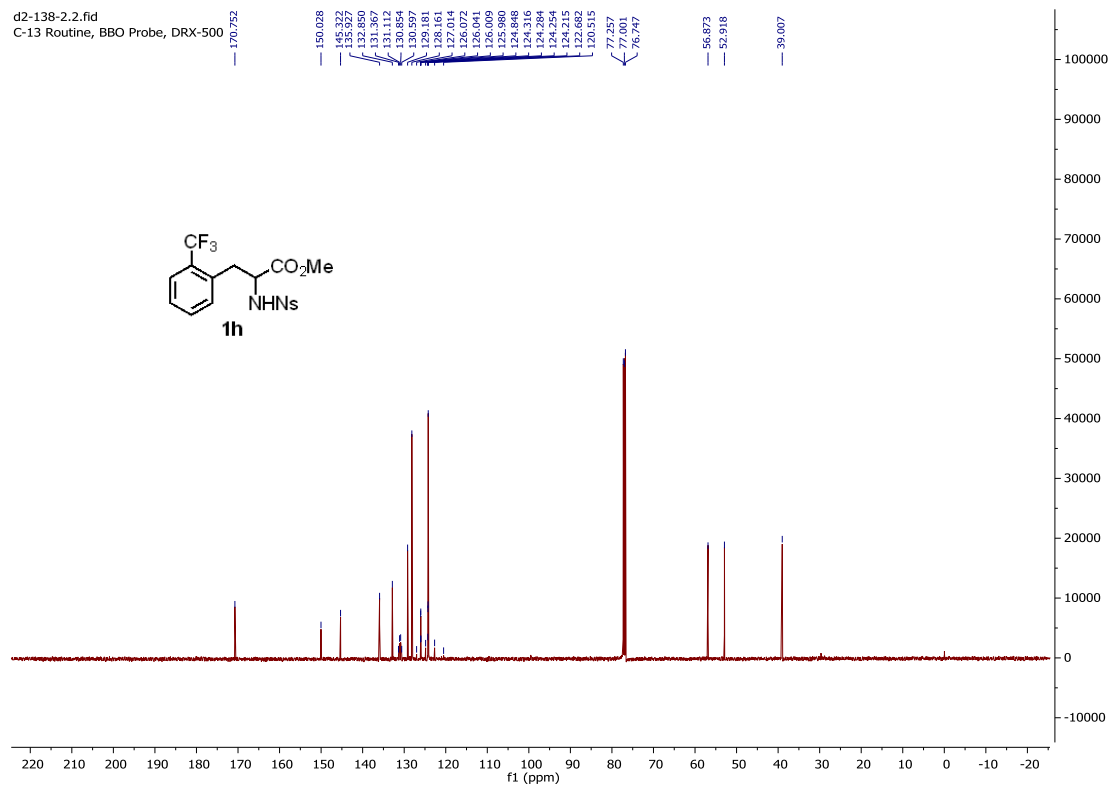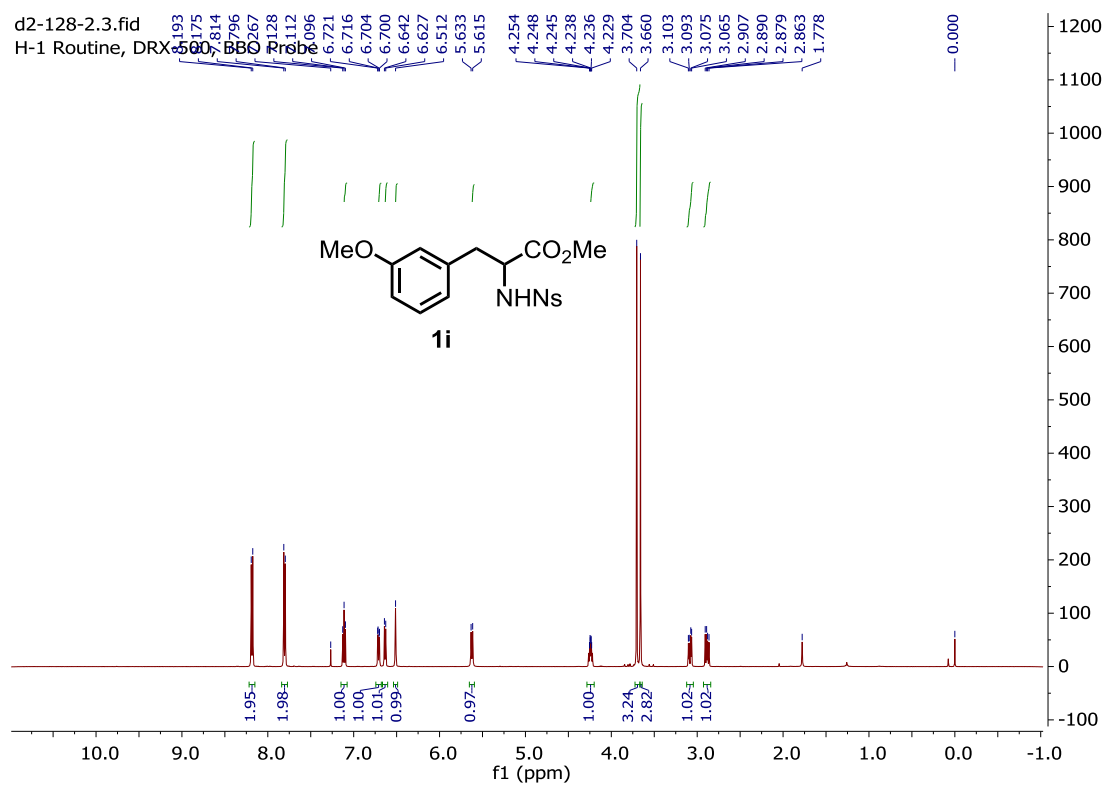



d2-128-2.4.fid  
C-13 Routine, BBO Probe, DRX-500

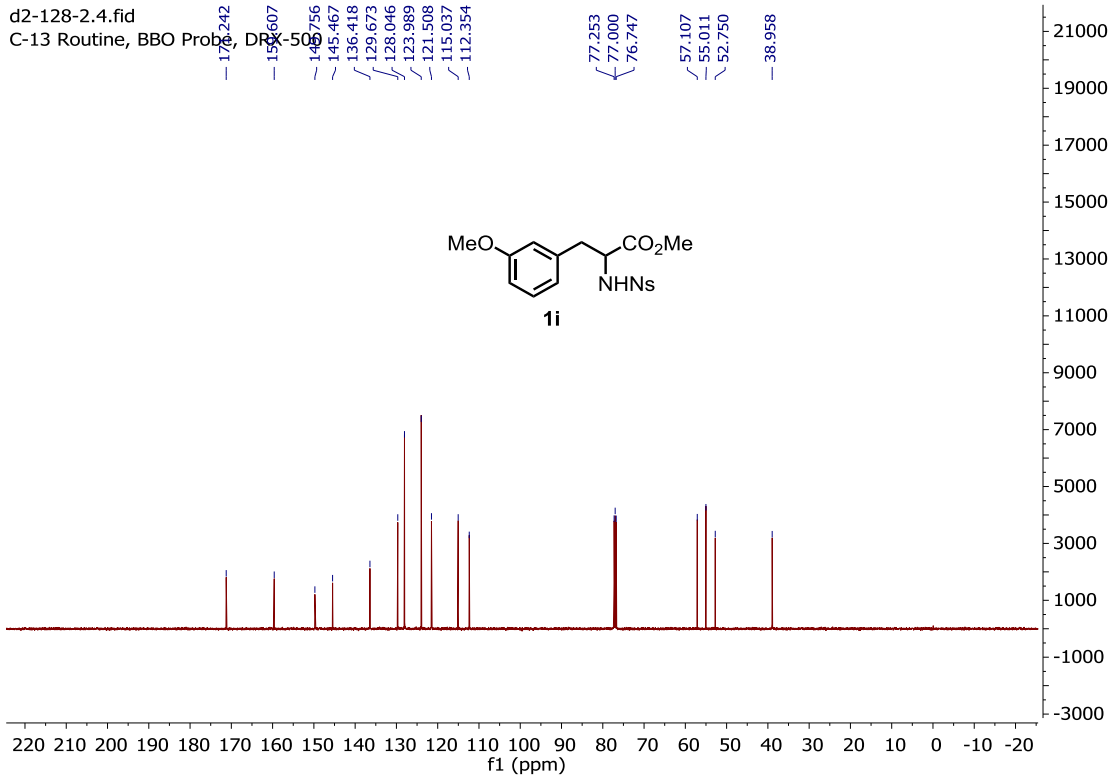

d2-19\_ppp\_01  
Std proton

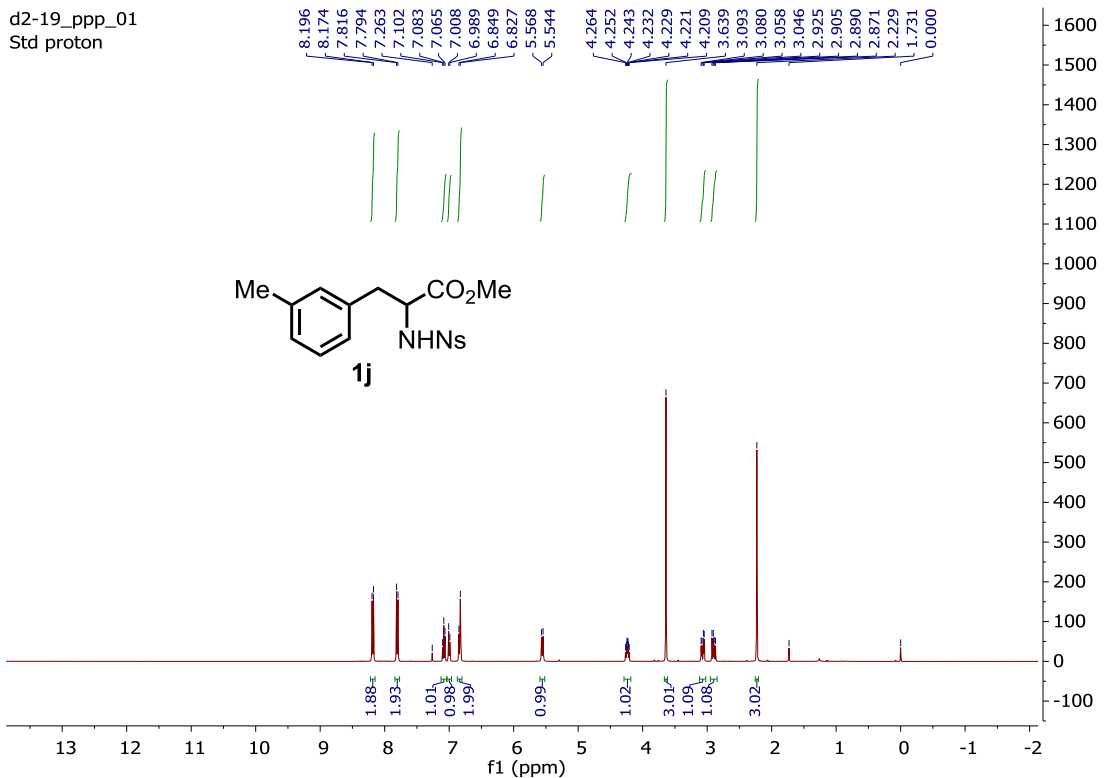

d2-19\_ppp\_C\_01  
Std proton

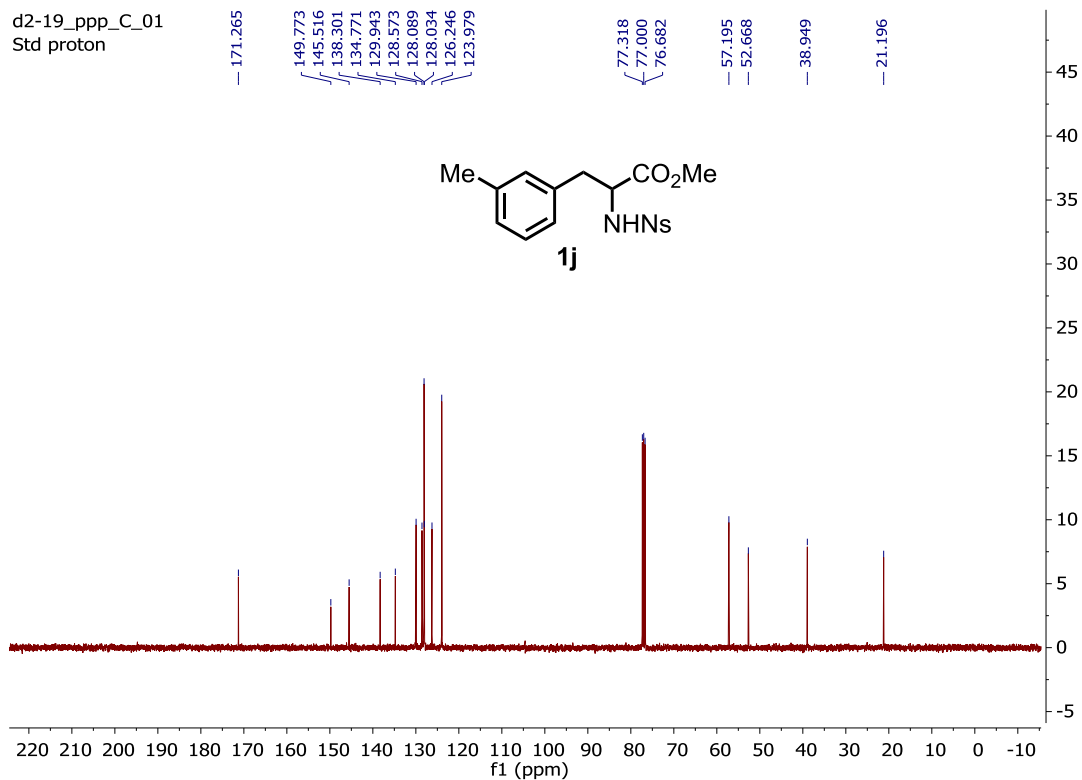

d2-135-1.1.fid  
H-1 Routine, DRX-500

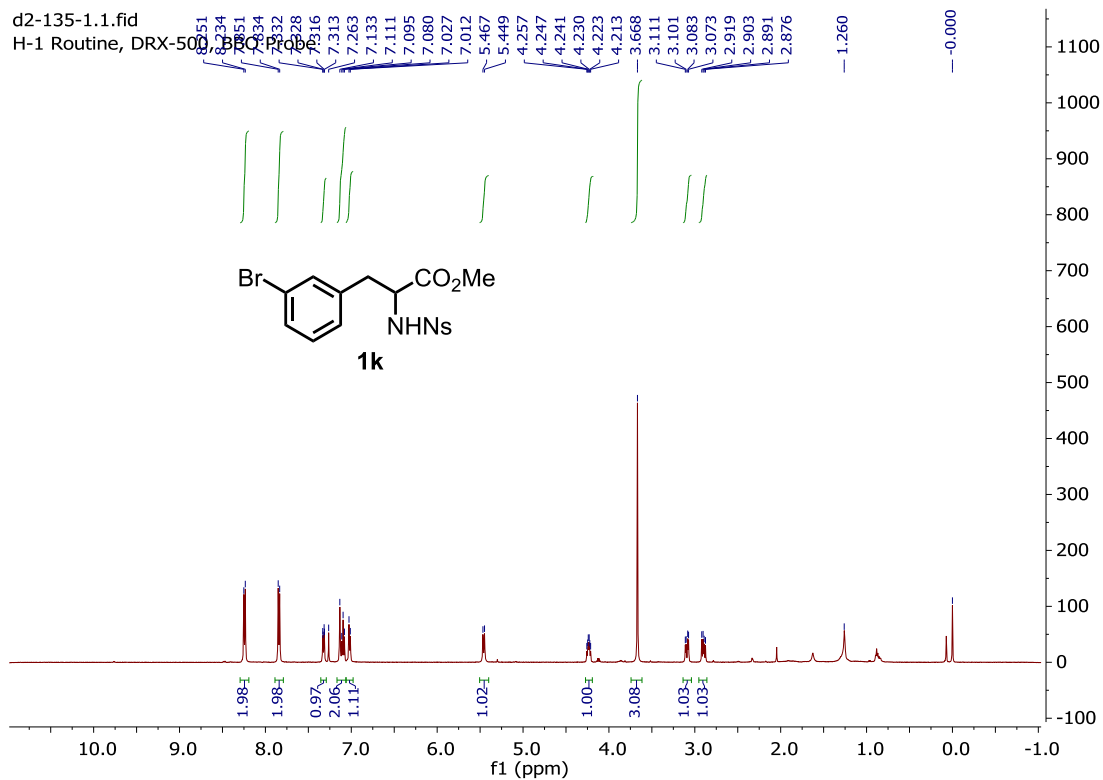

d2-135-1.2.fid  
C-13 Routine, BBO Probe, DRX-500

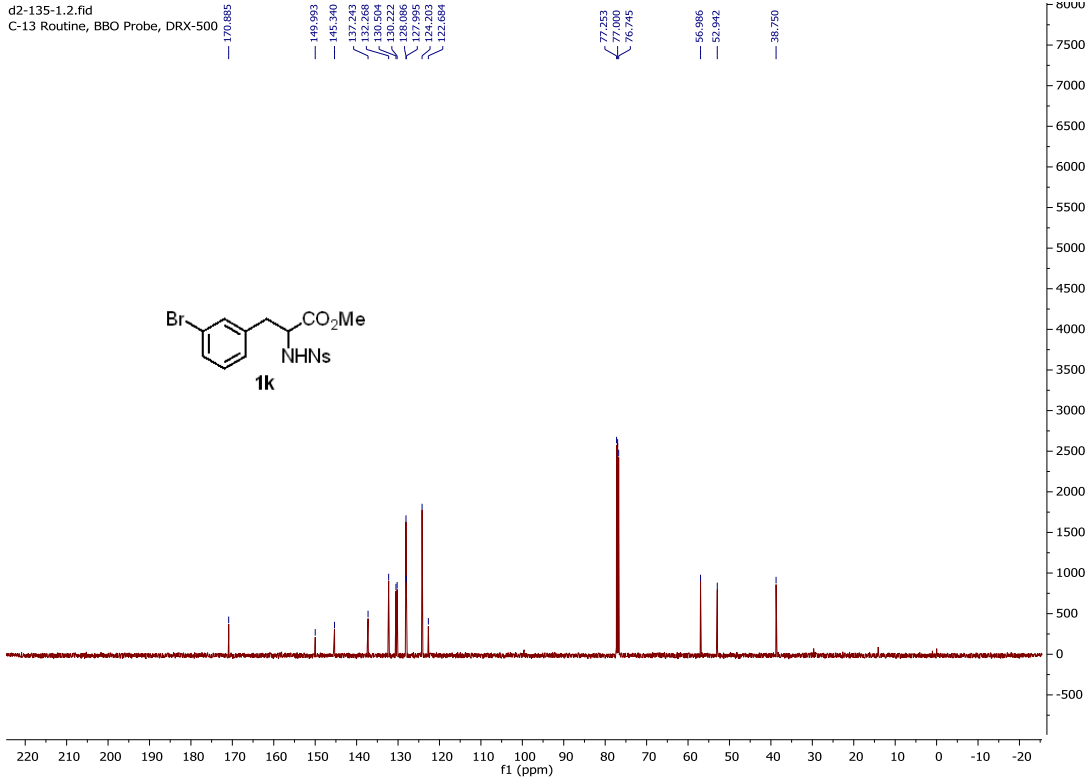

d2-12-2p\_01  
Std proton

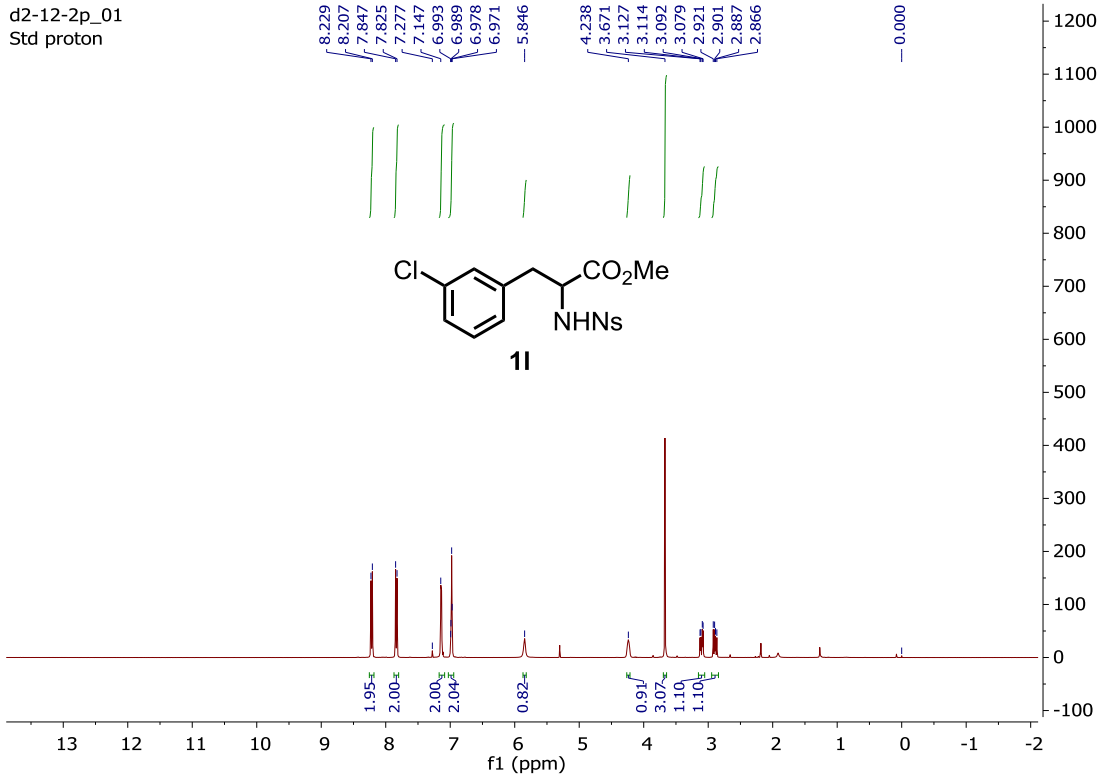

d2-12-2p\_C\_01  
Std proton

171.049  
149.837  
145.312  
137.091  
134.270  
129.872  
129.225  
127.969  
127.519  
127.394  
124.092

77.318  
77.000  
76.681

57.009  
52.855

38.508

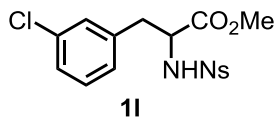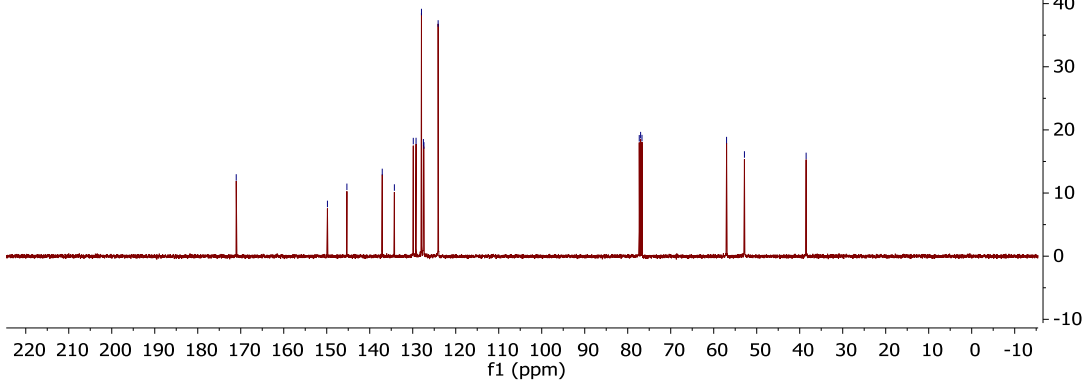

1m.1.fid  
H-1 Routine, DRX-500, BBO Probe

8.257  
8.240  
7.890  
7.872  
7.484  
7.394  
7.378  
7.363  
7.346  
7.310  
7.281

5.389  
5.371

4.288  
4.286  
4.266  
4.256

3.634  
3.212  
3.202  
3.184  
3.167  
3.081  
3.066  
3.053  
3.038

0.000

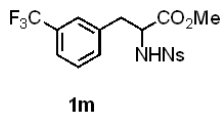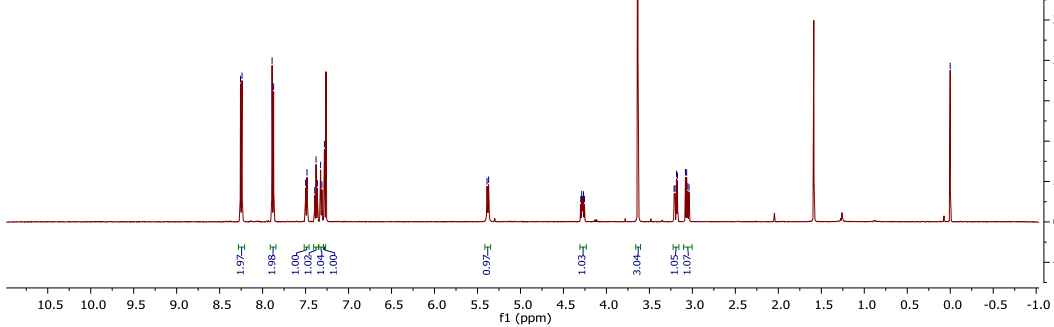

1m.2.fid

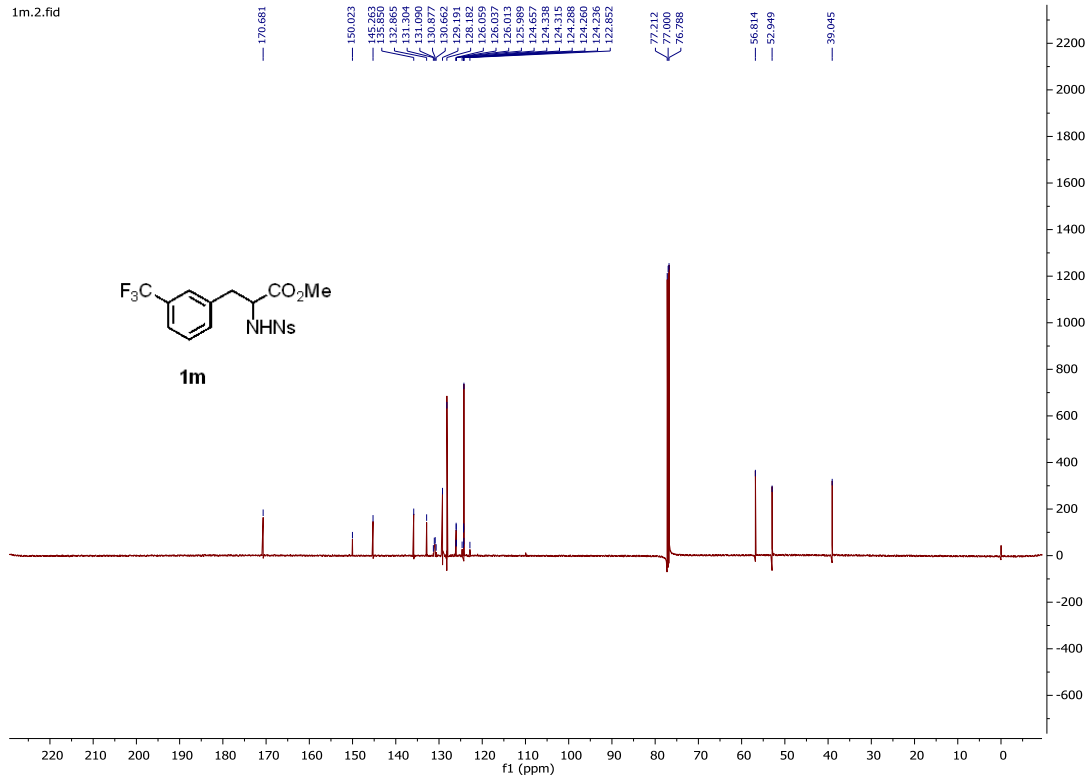

C:/Users/nmruser/Desktop/d2-14-2/1/fid

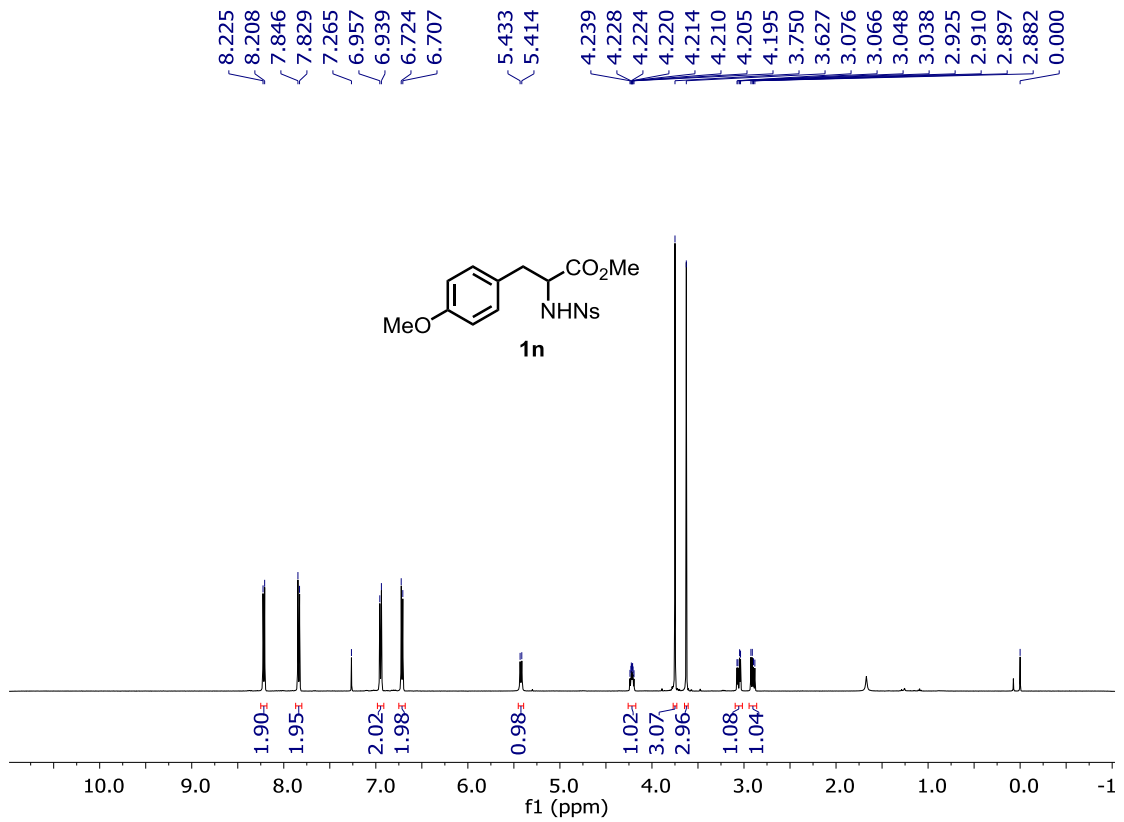

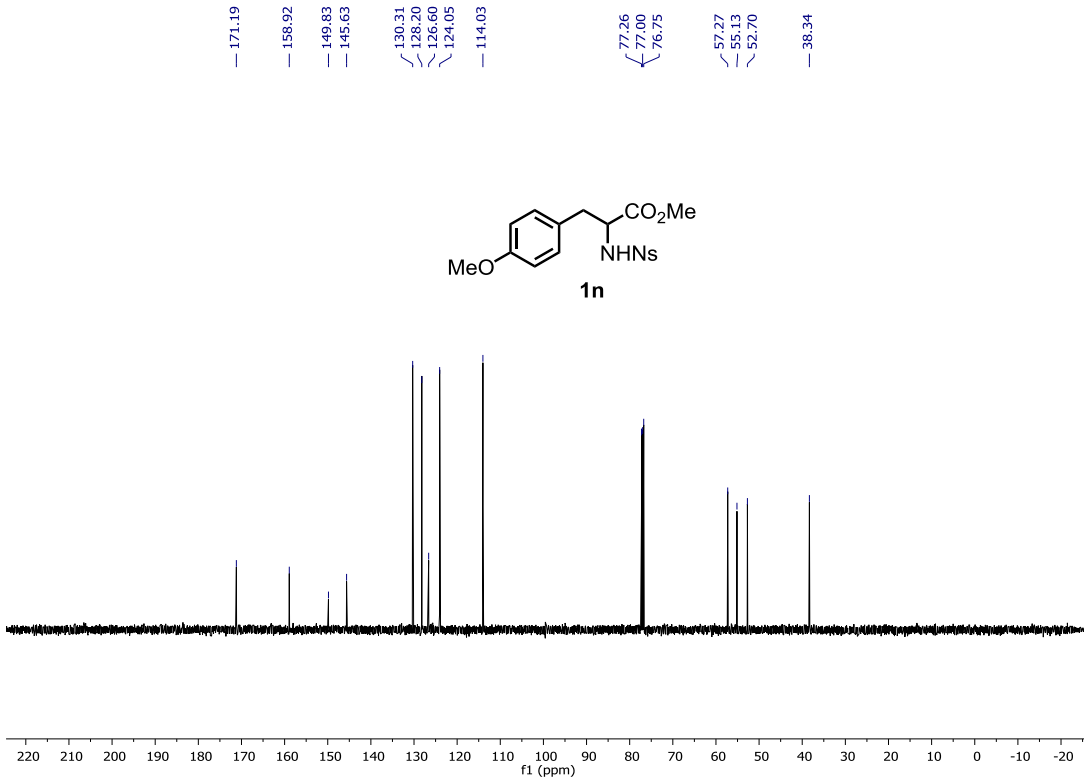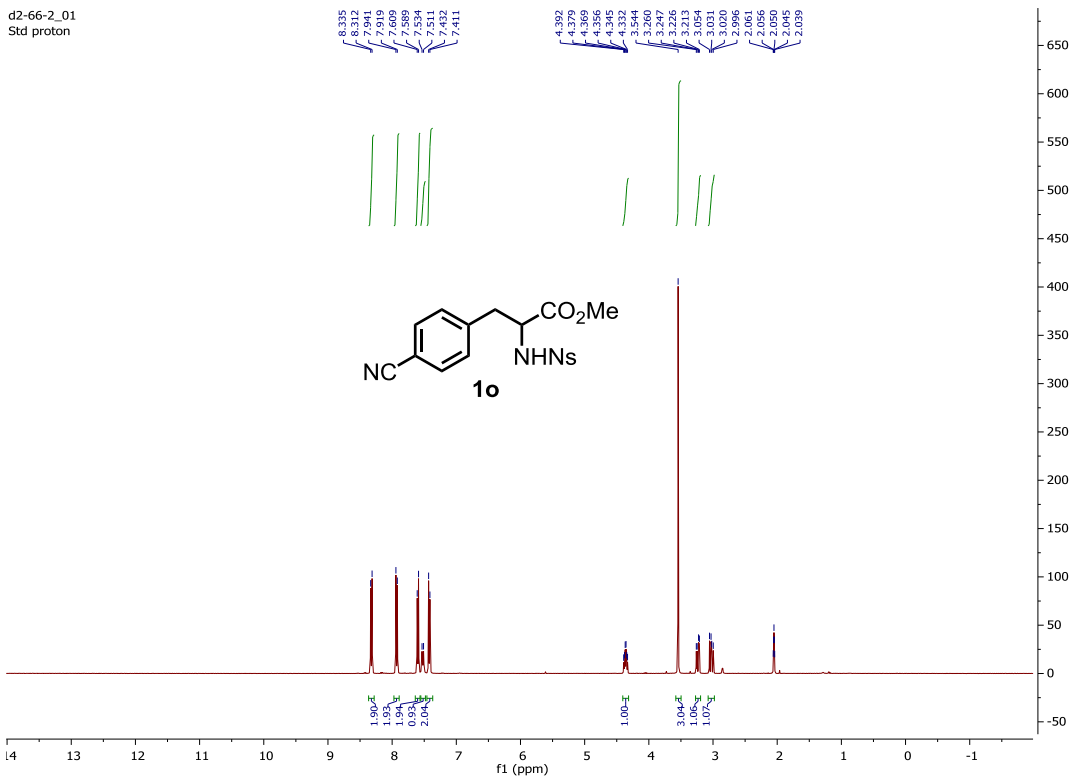

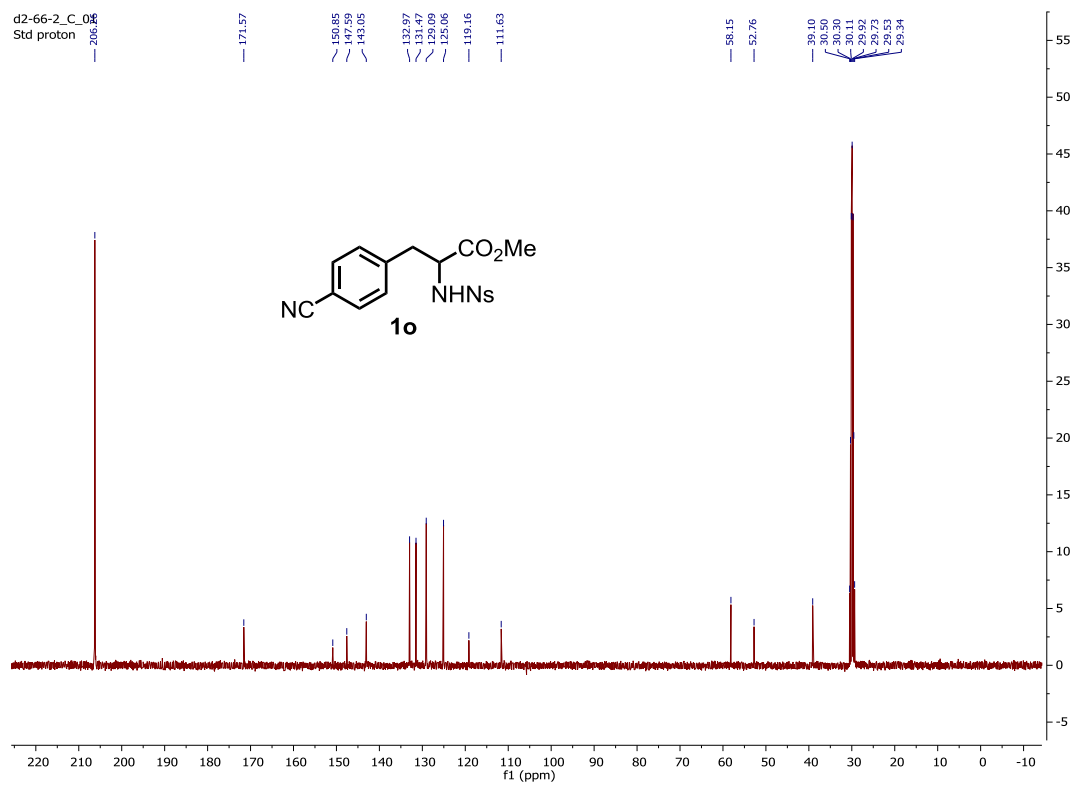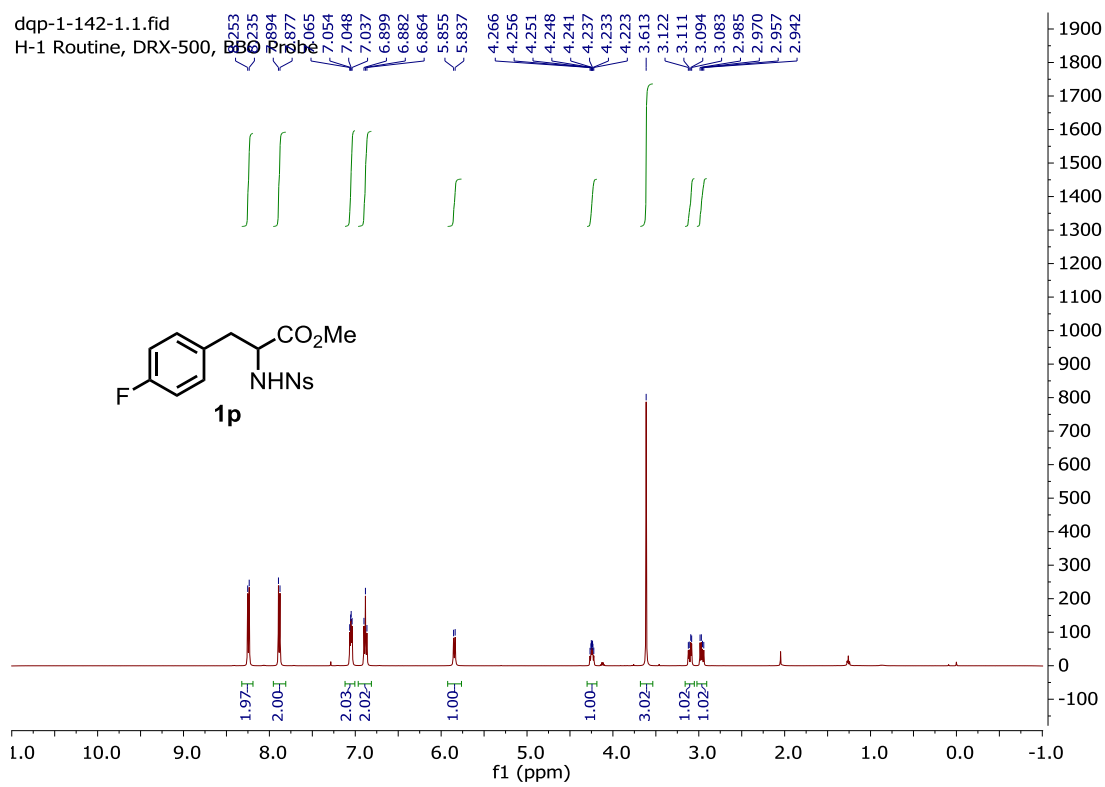

dqp-1-142-1.2.fid  
C-13 Routine, BBO Prob

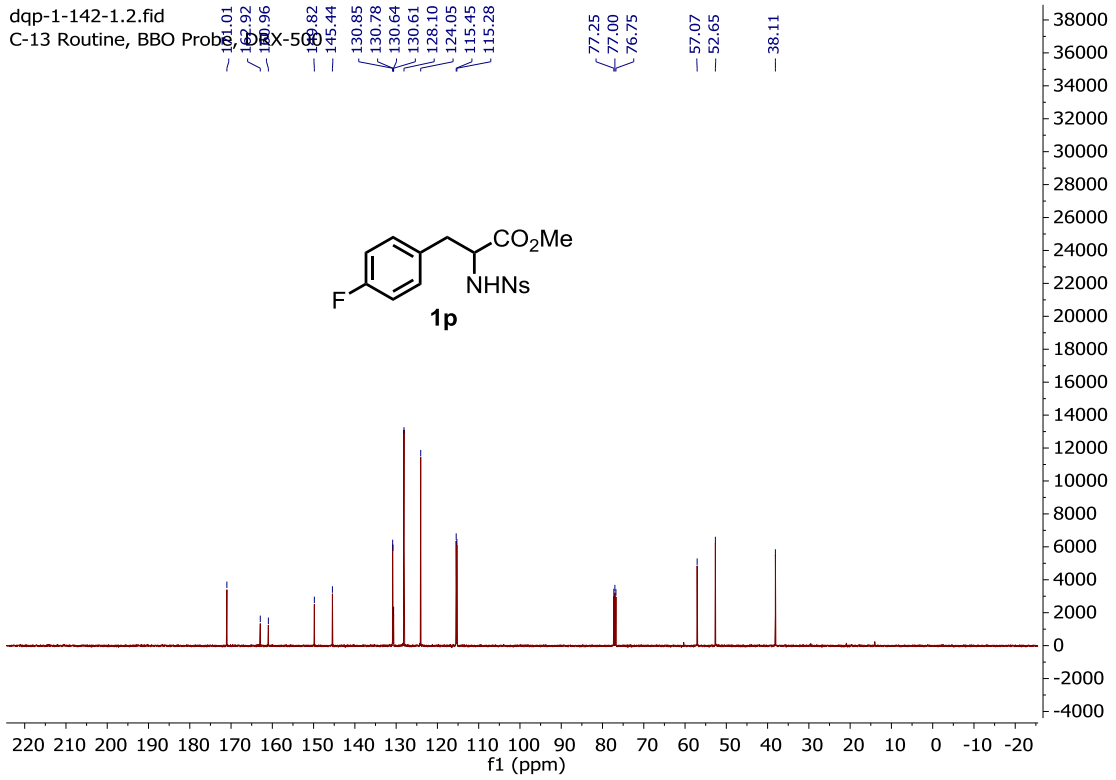

d2-137-1\_01  
Std proton

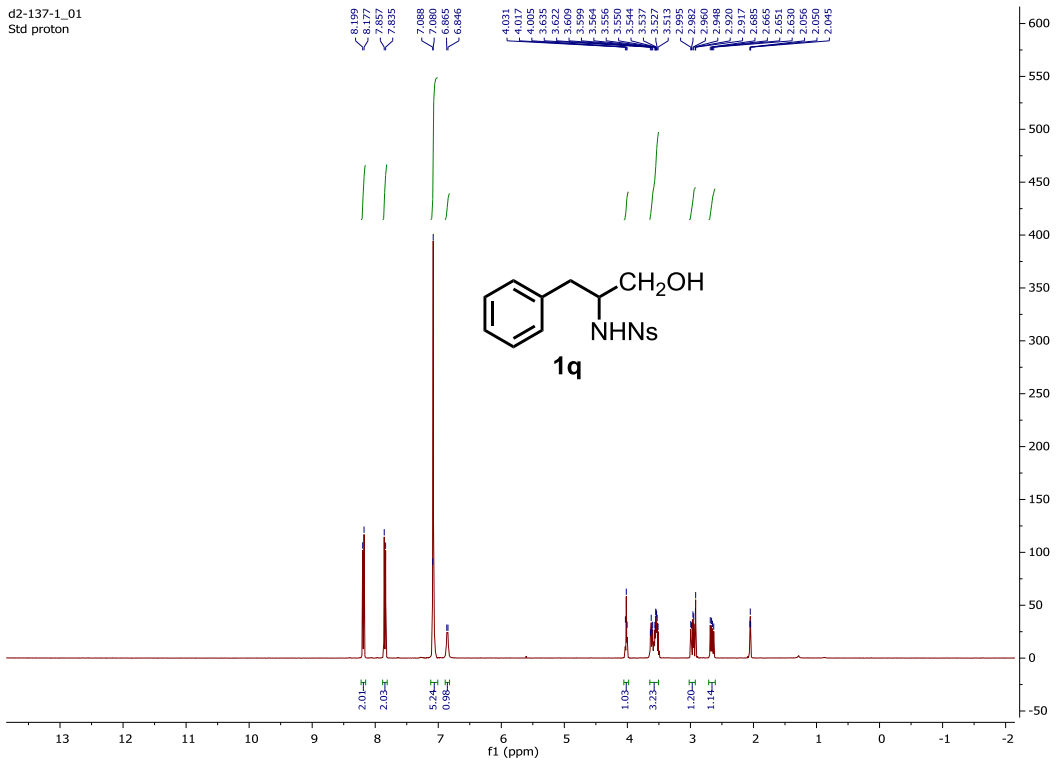



d2-137-1C\_02  
Std proton

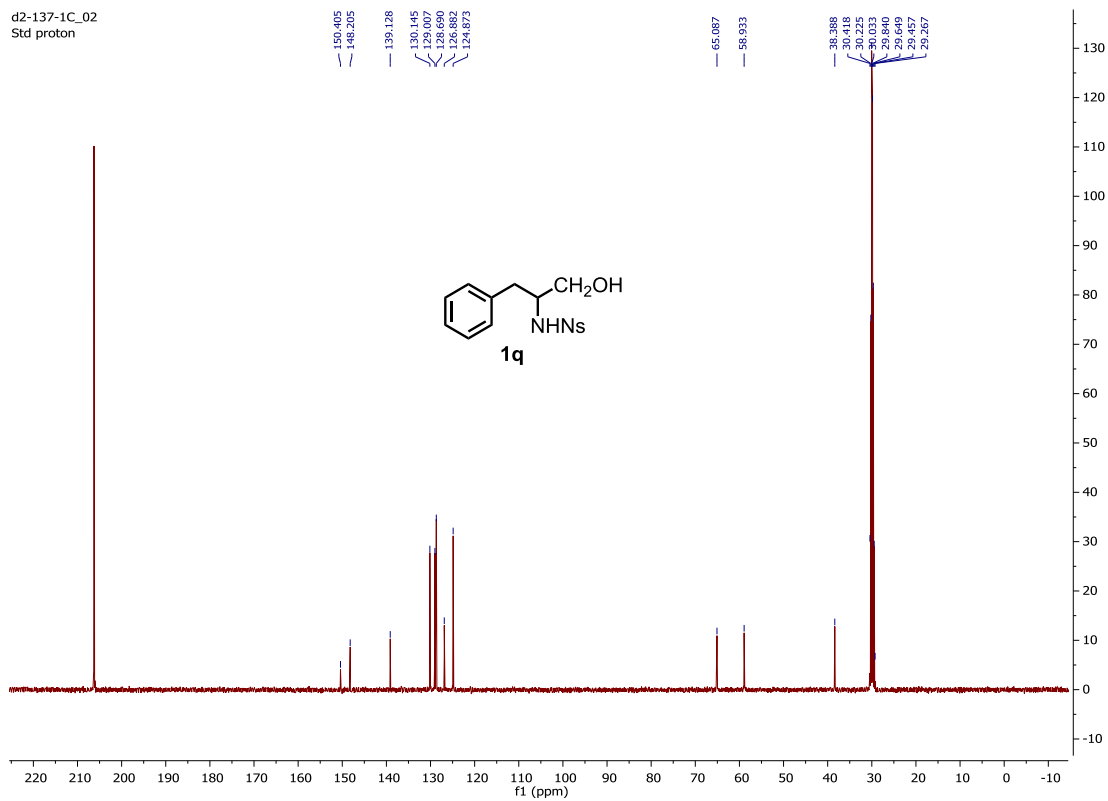

d2-137-2.1.fid  
H-1 Routine, DRX-500, BBO Pro

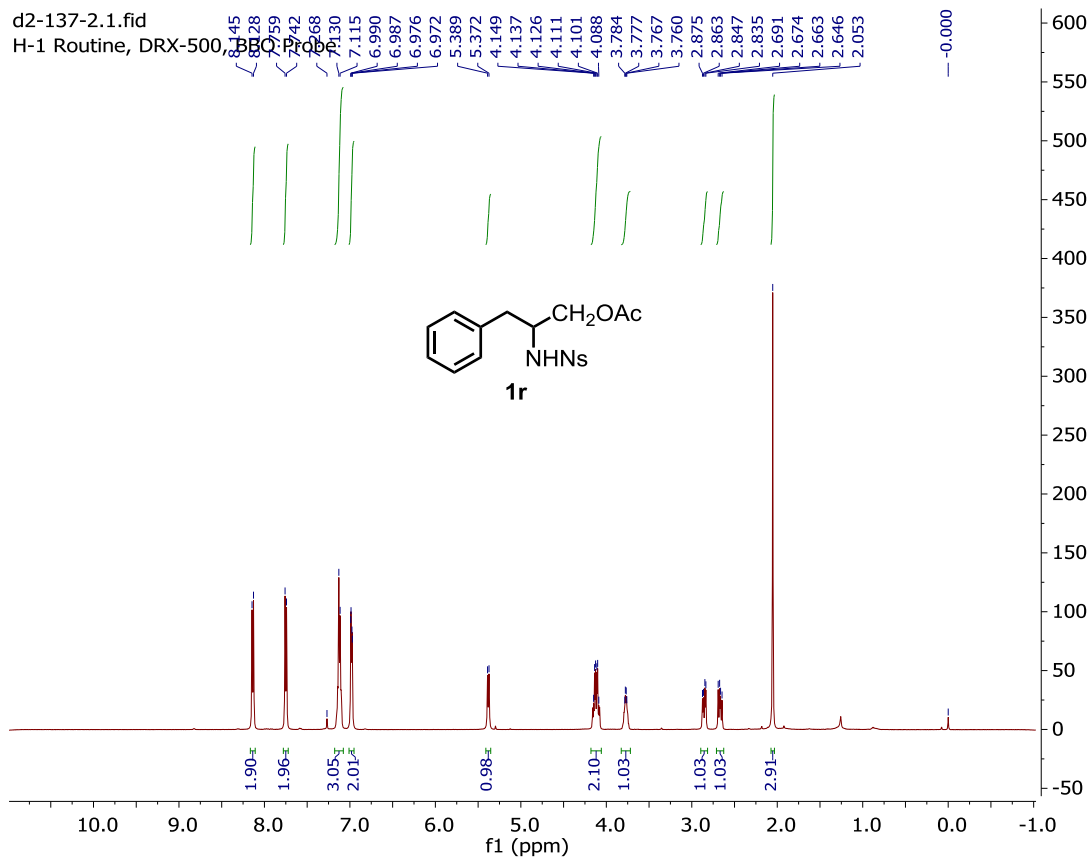

d2-137-2.2.fid  
C-13 Routine, BBO Probe, DRX

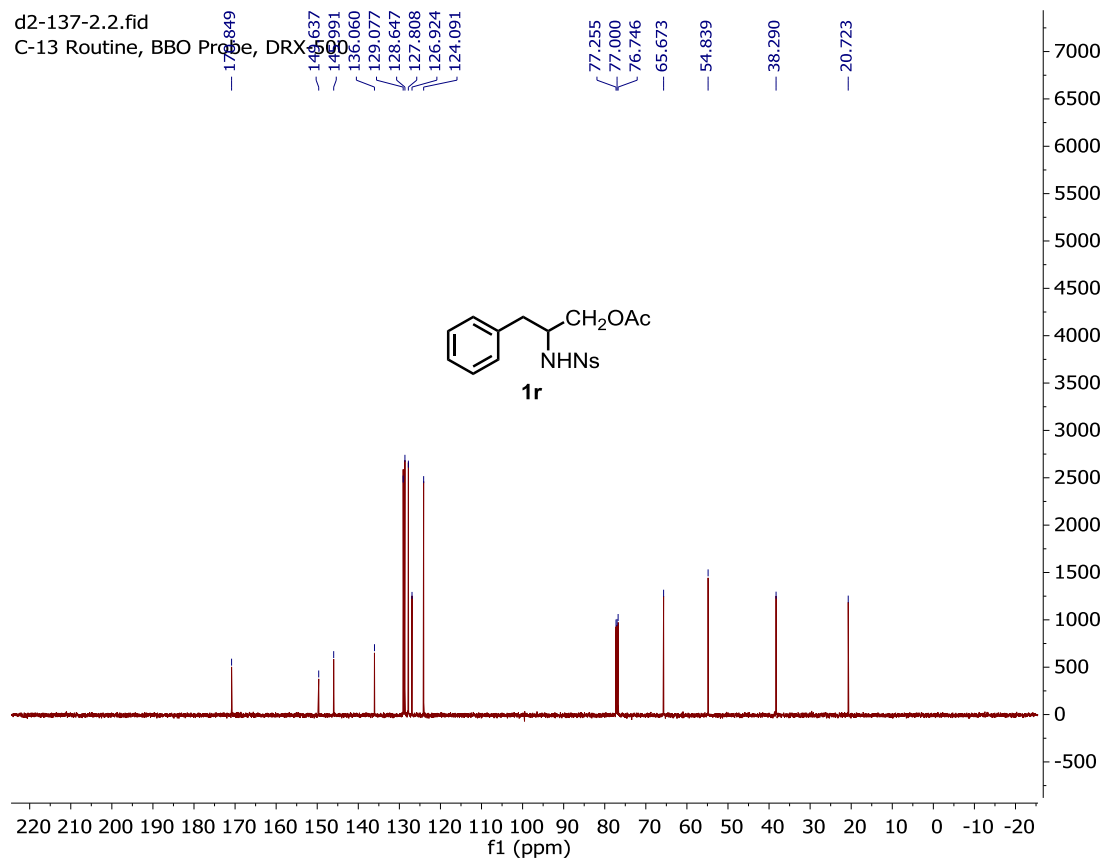

C:/Users/nmruser/Desktop

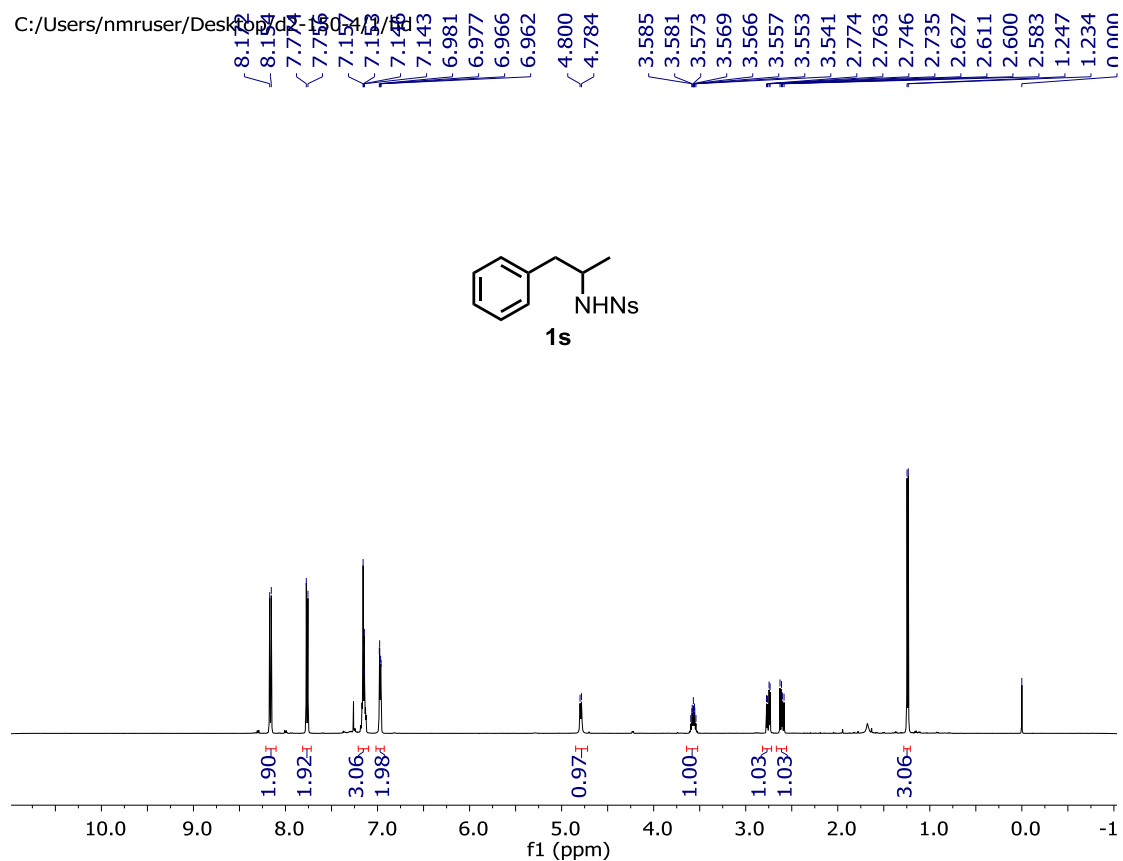

C:/Users/nmruser/Desktop/d2-134-3

149.63  
146.58  
136.82  
129.12  
128.57  
127.88  
126.80  
124.09

77.25  
77.00  
76.75

51.99  
43.36

22.37

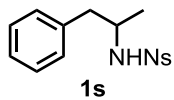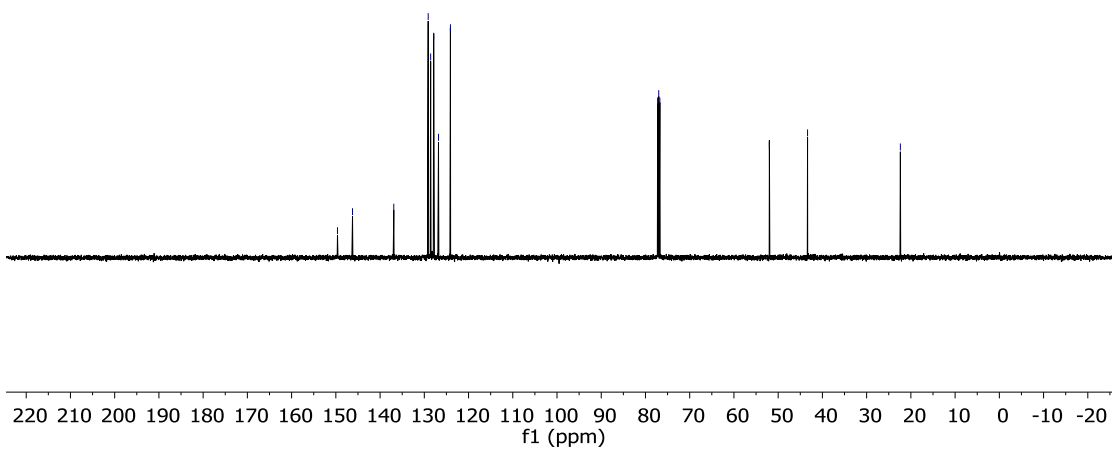

d2-134-3 redo  
H-1 Routine, DQF, BBO Probe

8.008  
7.667  
7.590  
7.261  
7.133  
7.117  
7.101  
6.828  
6.817  
6.813  
6.721  
6.708  
6.706  
6.692  
6.679  
6.662  
5.219  
3.767  
3.485  
3.476  
3.472  
3.463  
3.456  
3.452  
3.443  
3.439  
3.430  
2.733  
2.714  
2.712  
2.705  
2.686  
2.683  
2.593  
2.585  
2.565  
2.557  
1.557  
1.362  
1.349  
0.000

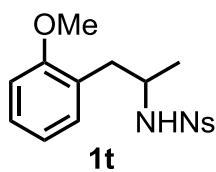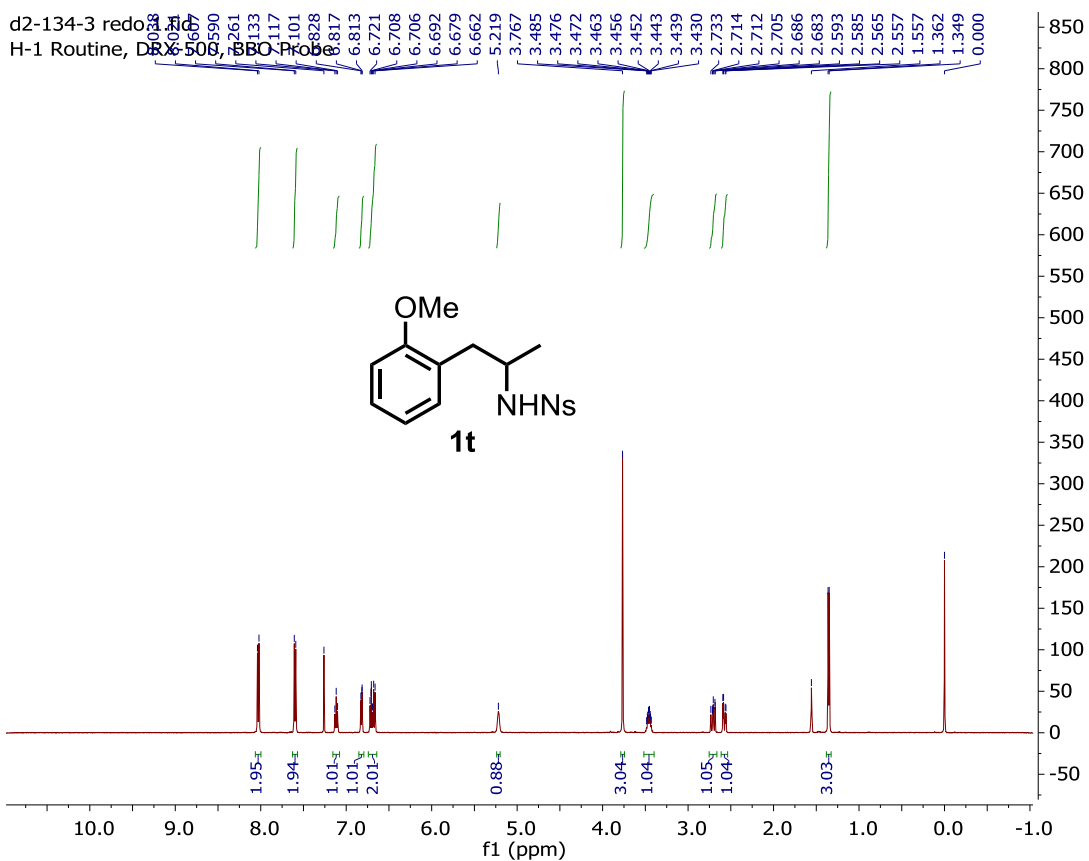



d2-150-5 red

150.077  
150.074  
144.631  
136.781  
134.885  
132.406  
130.521  
129.157  
128.701  
128.259  
126.725  
126.282  
125.966  
125.932  
124.012  
122.130  
77.318  
77.002  
76.683  
- 33.989  
- 23.865

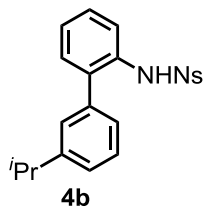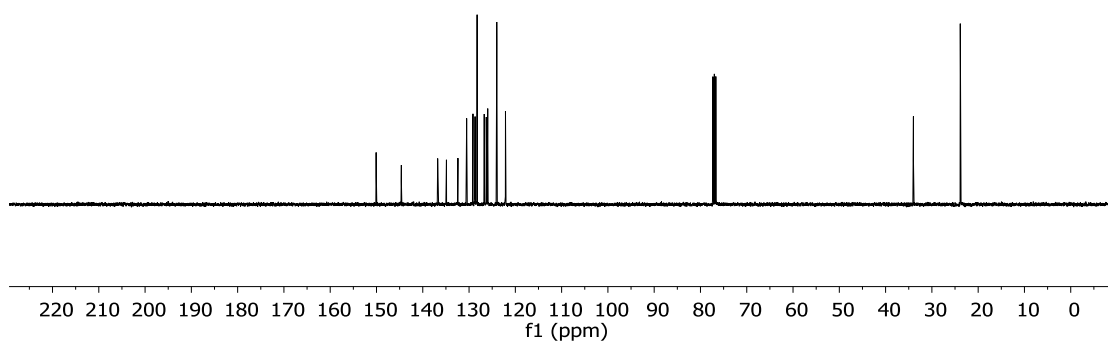

8.244  
8.223  
7.768  
7.749  
7.743  
7.740  
7.725  
7.387  
7.383  
7.371  
7.368  
7.355  
7.352  
7.307  
7.304  
7.292  
7.289  
7.263  
7.259  
7.246  
7.203  
7.201  
7.188  
7.186  
7.173  
7.171  
7.132  
7.130  
7.118  
7.115  
7.103  
7.053  
7.050  
7.037  
7.034  
6.520  
6.518  
6.505  
6.503  
6.403  
1.841  
0.000

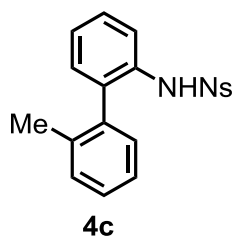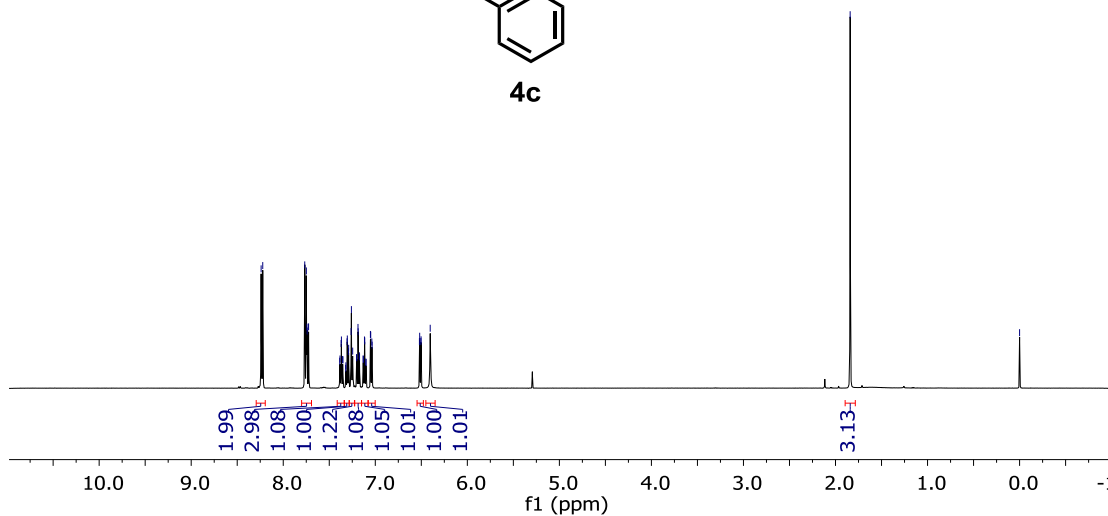

MM-2-387

150.20  
144.79  
136.36  
135.67  
133.07  
132.89  
130.85  
130.34  
129.18  
128.89  
128.79  
128.44  
126.41  
125.48  
124.13  
120.77  
77.25  
77.00  
76.75

— 19.46

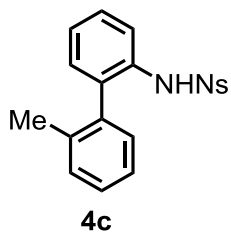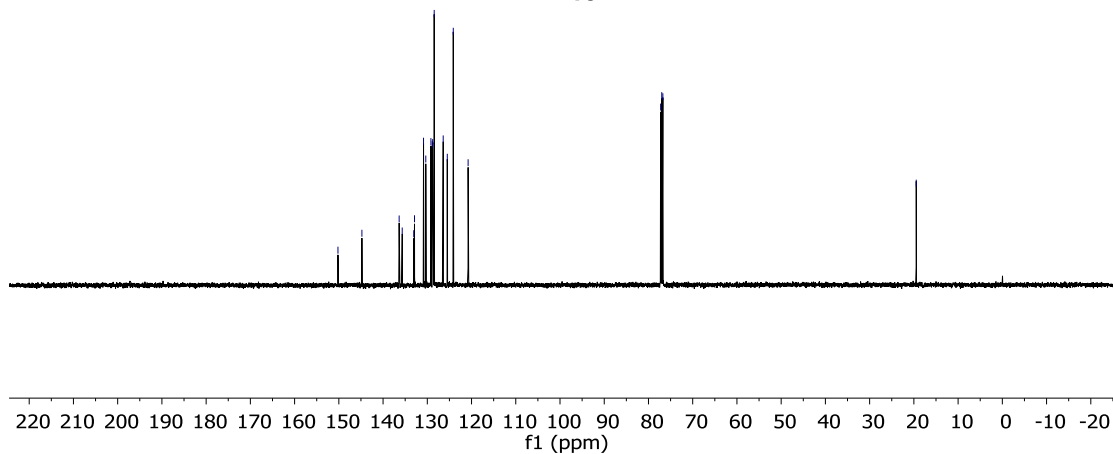

8.157  
8.139  
7.768  
7.745  
7.264  
7.190  
7.179  
7.169  
7.158  
7.154  
7.141  
7.045  
7.032  
7.009  
6.539  
6.522  
5.641  
5.626  
4.389  
4.380  
4.372  
4.363  
4.000  
3.997  
3.985  
3.981  
3.729  
3.142  
3.129  
3.113  
3.101  
2.919  
2.902  
2.891  
2.873  
1.713  
0.829  
0.815  
0.801  
0.787  
0.001

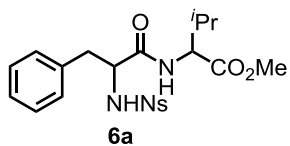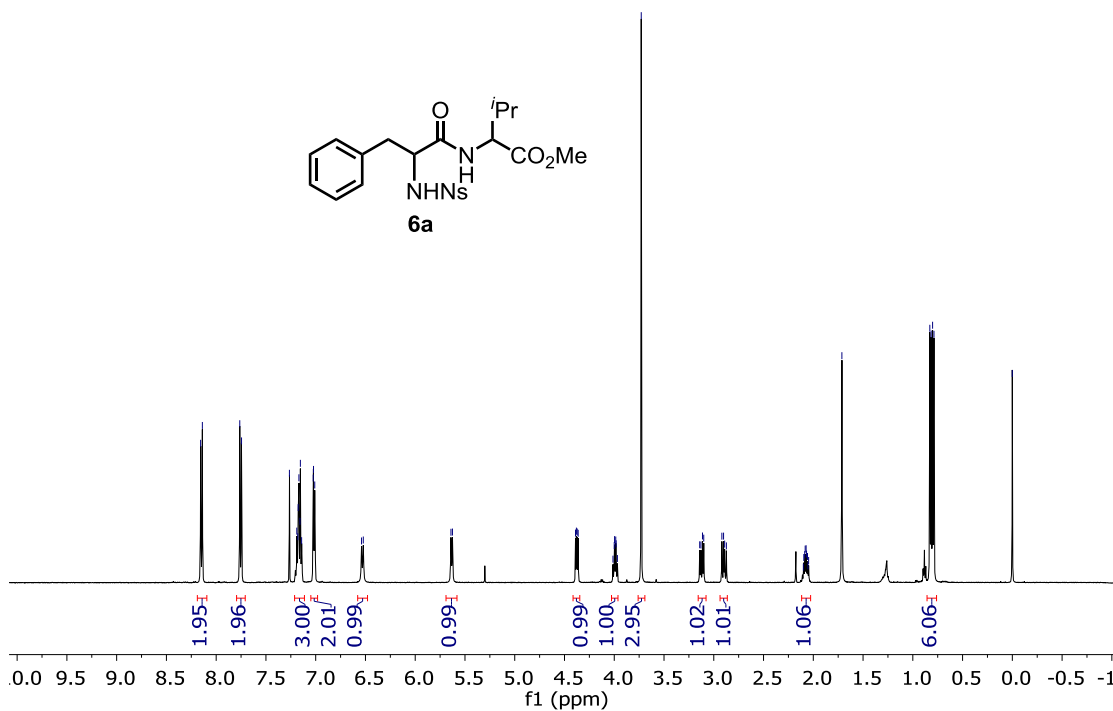

C:/Users/nmruser/Desktop/d2-149-3-1.fid

171.899  
169.598  
149.914  
144.595  
135.332  
129.030  
128.978  
128.228  
127.420  
124.199

77.256  
77.002  
76.746  
58.654  
57.280  
-39.227  
-31.172  
18.732  
17.450

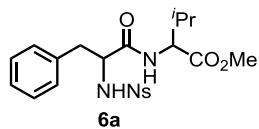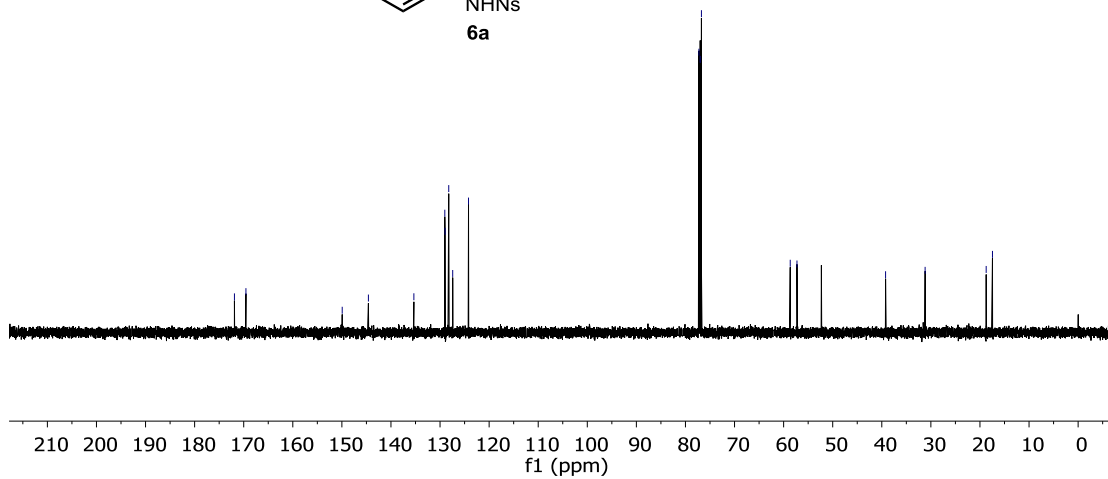

C:/Users/nmruser/Desktop/d2-149-3-1.fid

8.156  
8.138  
7.785  
7.768  
7.268  
7.188  
7.177  
7.148  
7.138  
7.122  
7.117  
7.038  
7.033  
7.018  
7.015  
6.742  
6.675  
6.009

4.473  
4.458  
4.444  
4.044  
3.734  
3.099  
3.087  
3.070  
3.059  
2.940  
2.935  
2.923  
2.918  
2.912  
2.908  
2.895  
2.890  
1.326  
1.312  
-0.000

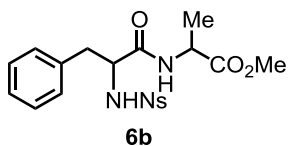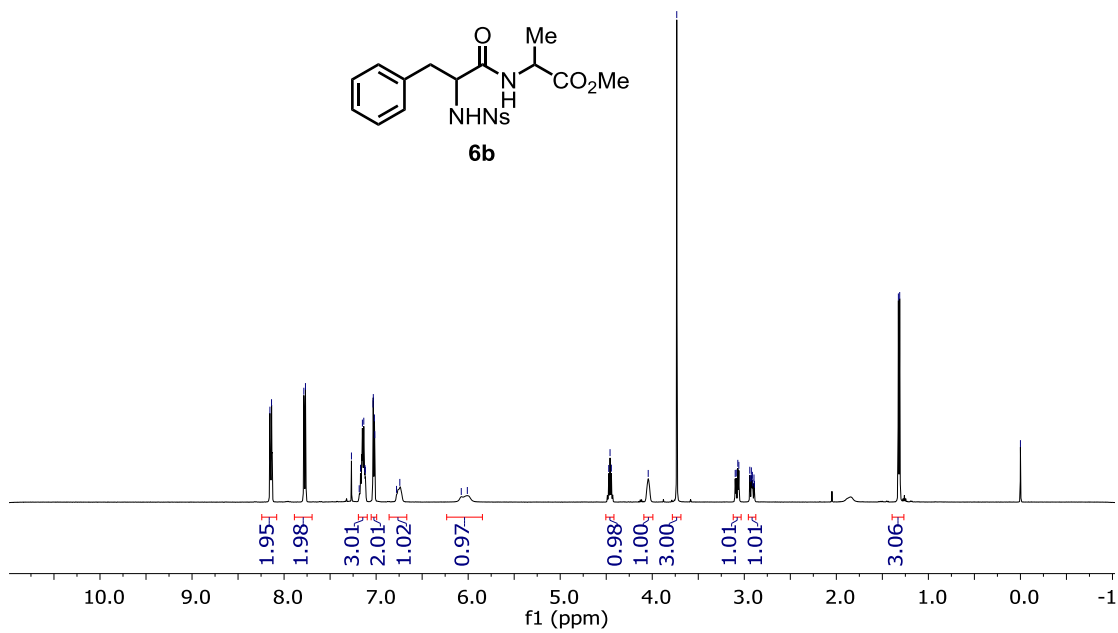

C:/Users/nmruser/Desktop/d25149-179

172.655  
169.67  
149.855  
145.149  
135.372  
129.129  
128.75  
128.11  
127.26  
124.15  
77.26  
77.00  
76.75  
58.41  
52.62  
48.38  
38.88  
-18.10

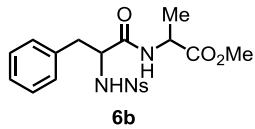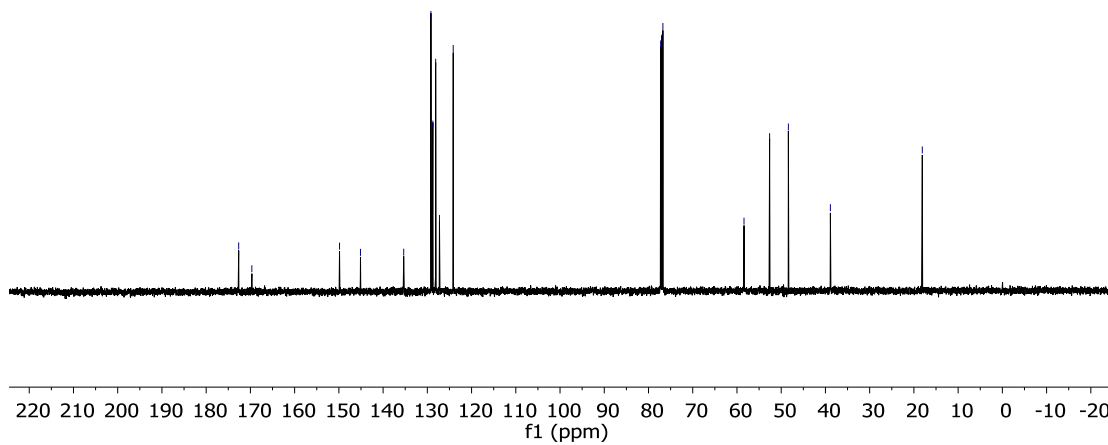

8.126  
8.101  
7.764  
7.749  
7.776  
7.705  
7.620  
7.605  
6.951  
6.886  
6.863  
6.848  
6.820  
6.802  
4.441  
4.431  
4.423  
4.414  
4.093  
4.081  
4.075  
4.063  
3.723  
3.097  
3.085  
2.874  
2.856  
2.846  
2.167  
2.090  
0.847  
0.833  
0.824  
0.810

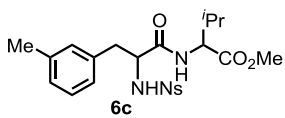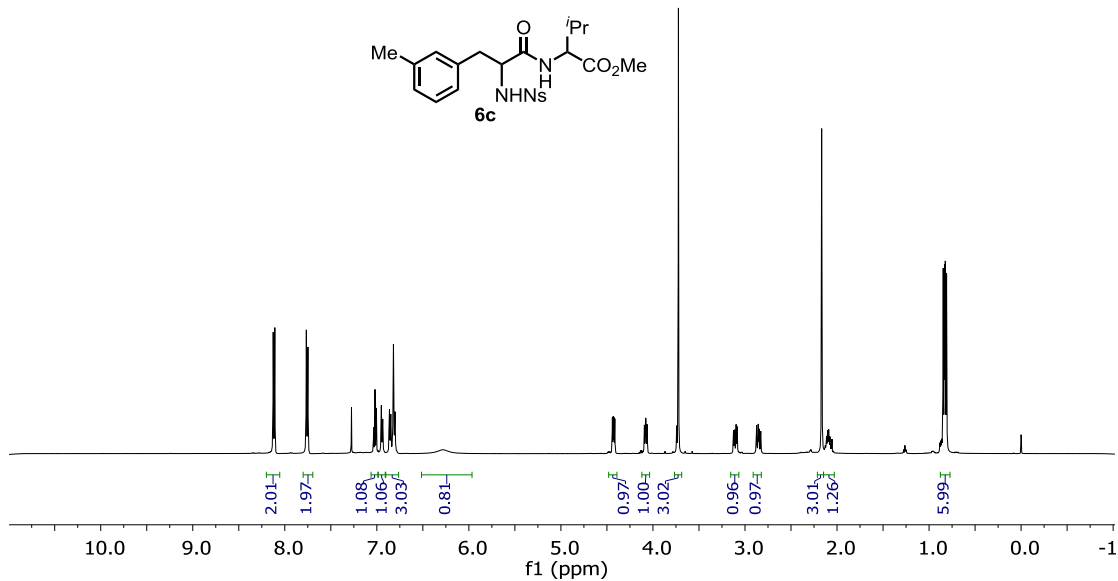



d2-154-4.4.fid  
C-13 Routine, BBO

171.940  
170.054  
149.689  
144.801  
138.813  
135.429  
129.768  
128.683  
128.073  
127.875  
126.088  
123.955  
77.254  
77.001  
76.745  
58.803  
57.235  
52.228  
38.915  
31.161  
21.042  
18.646  
17.424

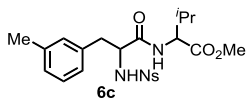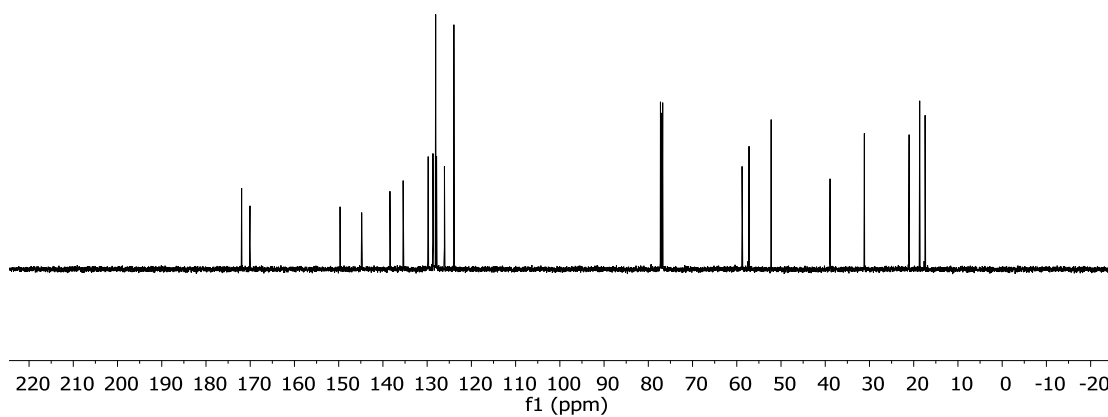

dqp-1-147-3\_01  
Std proton

8.152  
8.134  
8.130  
7.987  
7.968  
7.963  
7.950  
7.947  
7.239  
7.234  
7.229  
7.224  
7.219  
7.204  
7.200  
7.188  
7.183  
7.168  
7.163  
7.146  
7.142  
6.102  
5.200  
5.183  
3.651  
-0.000

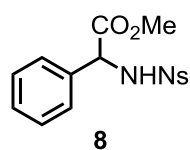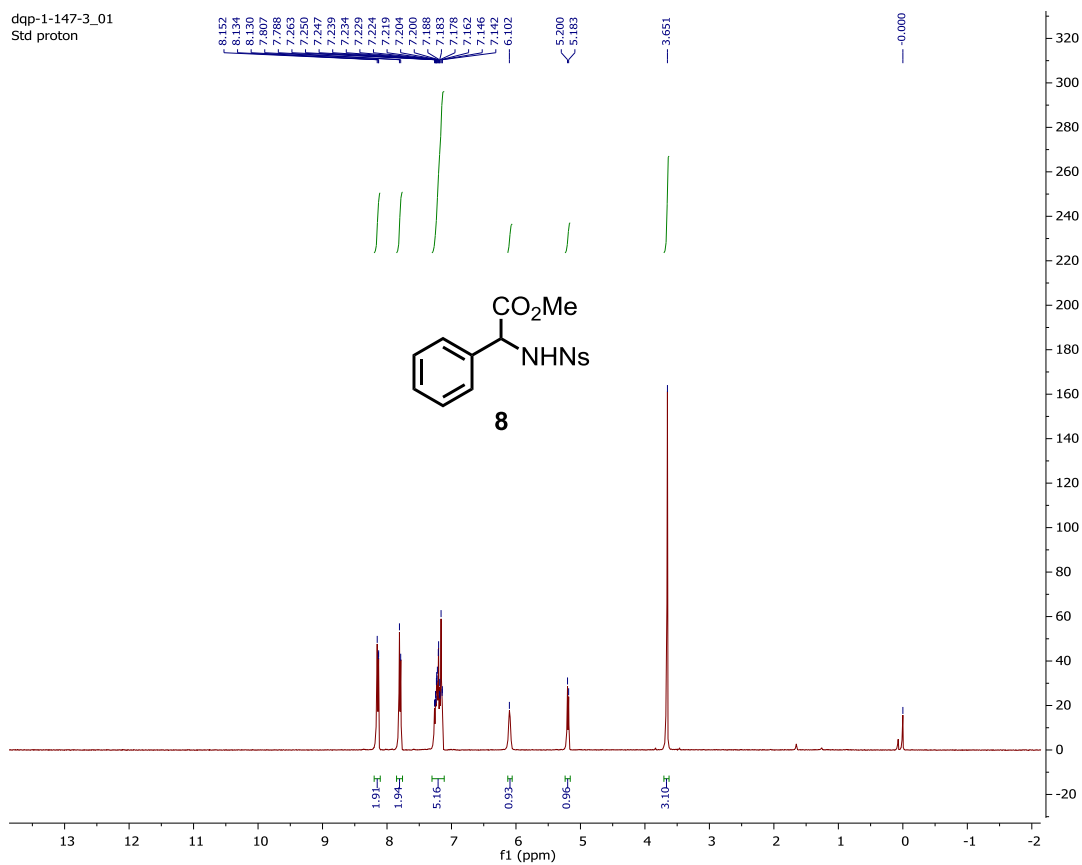

dqp-1-147-3\_C\_01  
Std proton

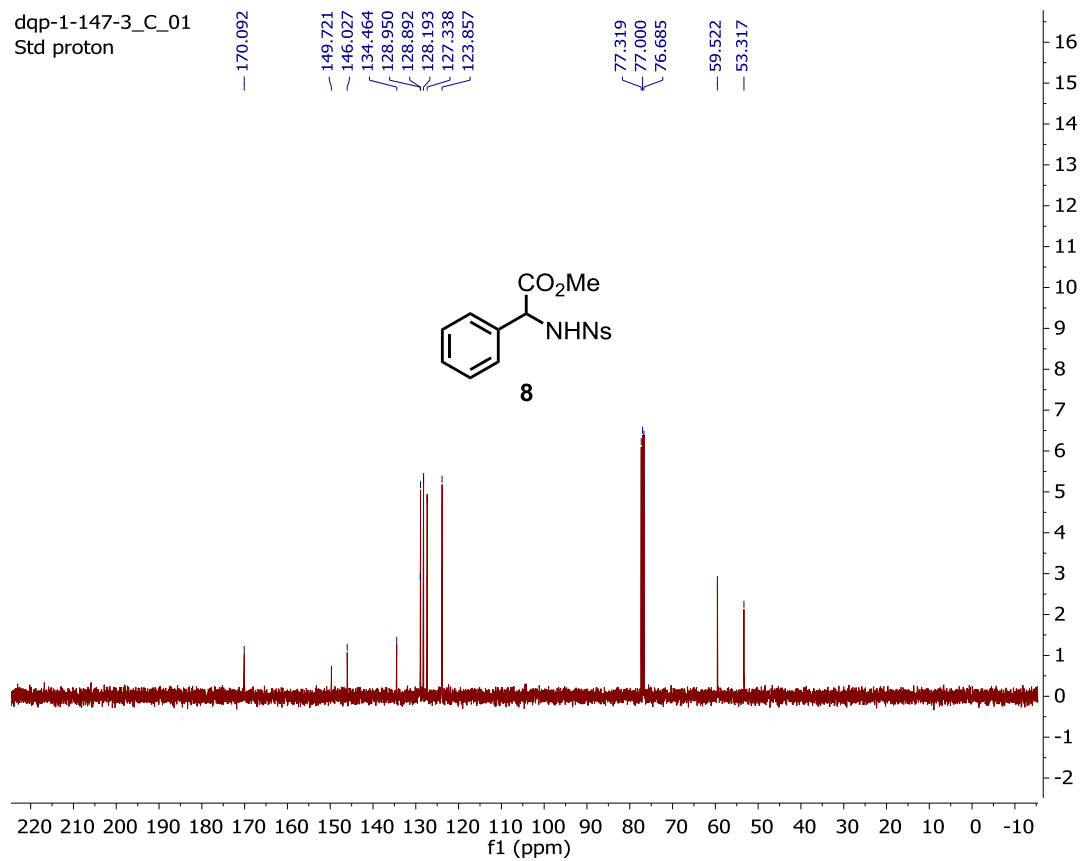

dqp-1-147-3\_C\_01  
H-1 Routine, DRX-500, BBO Probe

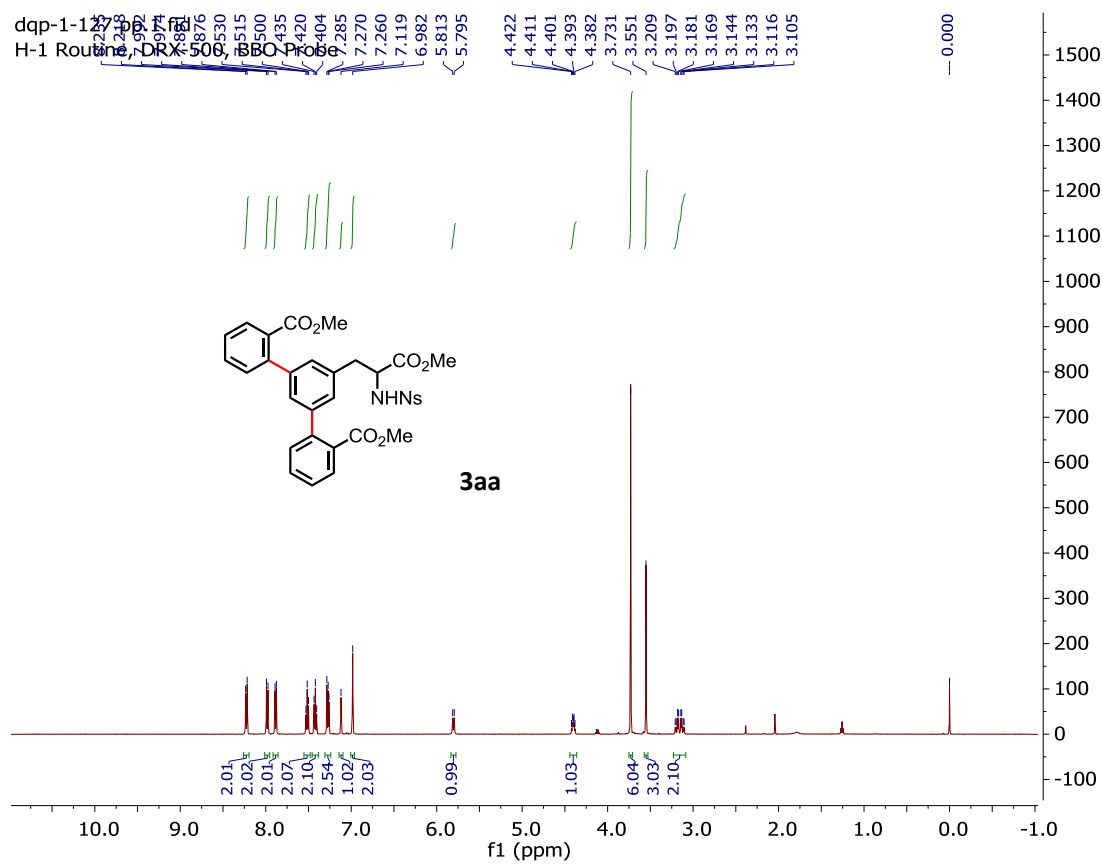

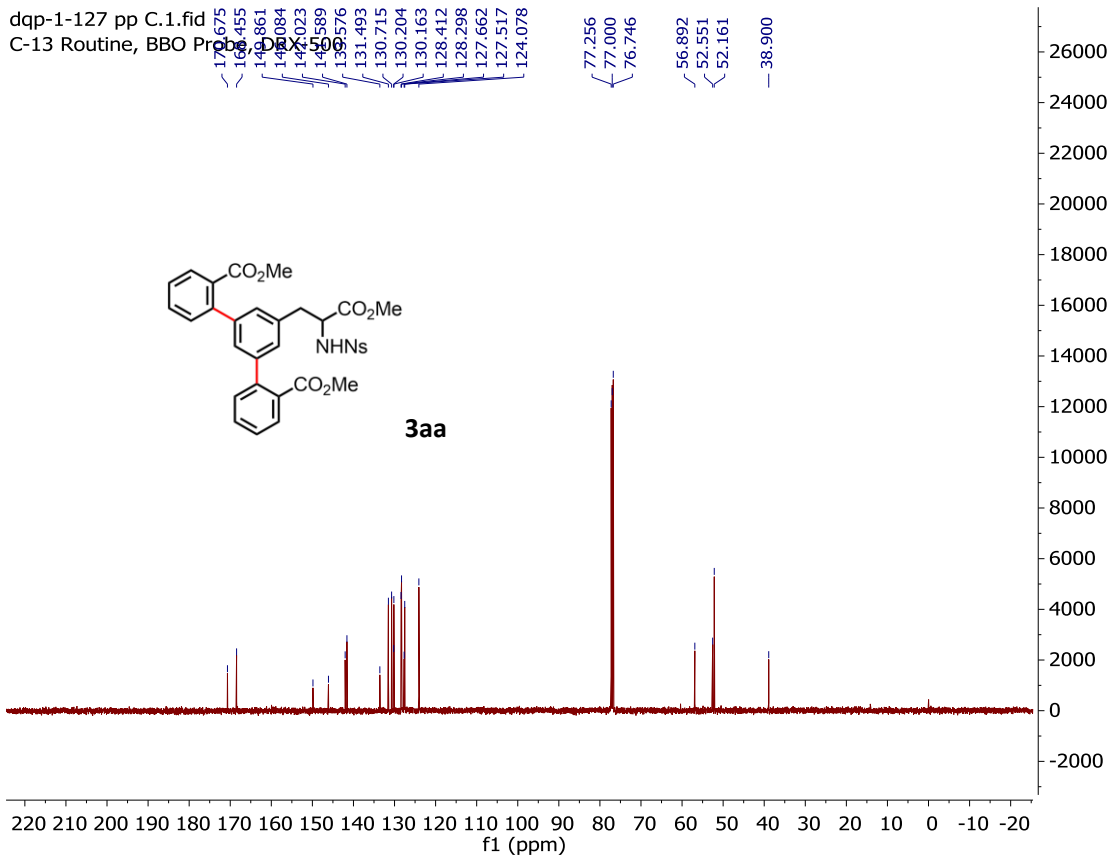

### Area % Report

Data File: C:\EZChrom

Elite\Enterprise\Projects\Default\Data\DQP\114-2-D-p-20%-0.5mL-ADH

Method: C:\EZChrom Elite\Enterprise\Projects\Default\Method\A 75 min without fc 0.5 ml per min.met

Acquired: 6/4/2015 6:08:22 PM

Printed: 8/27/2015 10:23:44 PM

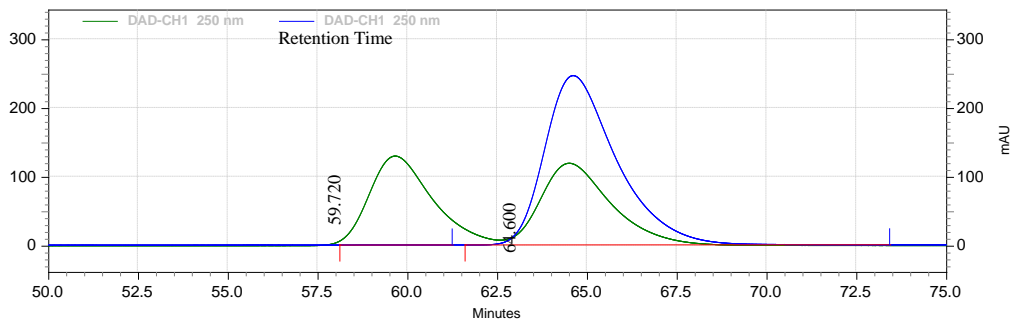

**DAD-CH1 250**

**nm Results**

| Retention Time | Area      | Area % | Height | Height % |
|----------------|-----------|--------|--------|----------|
| 59.720         | 32597     | 0.02   | 376    | 0.04     |
| 64.600         | 137108036 | 99.98  | 984748 | 99.96    |

|        |           |        |        |        |
|--------|-----------|--------|--------|--------|
| Totals | 137140633 | 100.00 | 985124 | 100.00 |
|--------|-----------|--------|--------|--------|

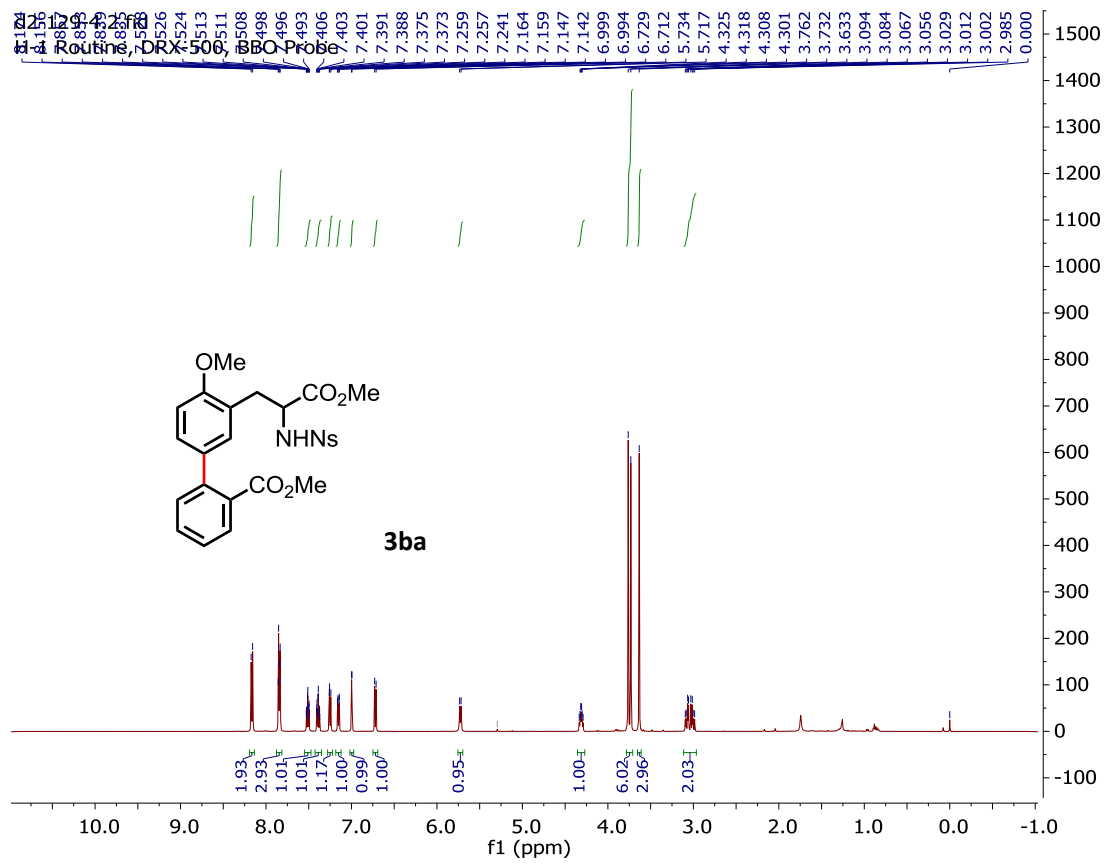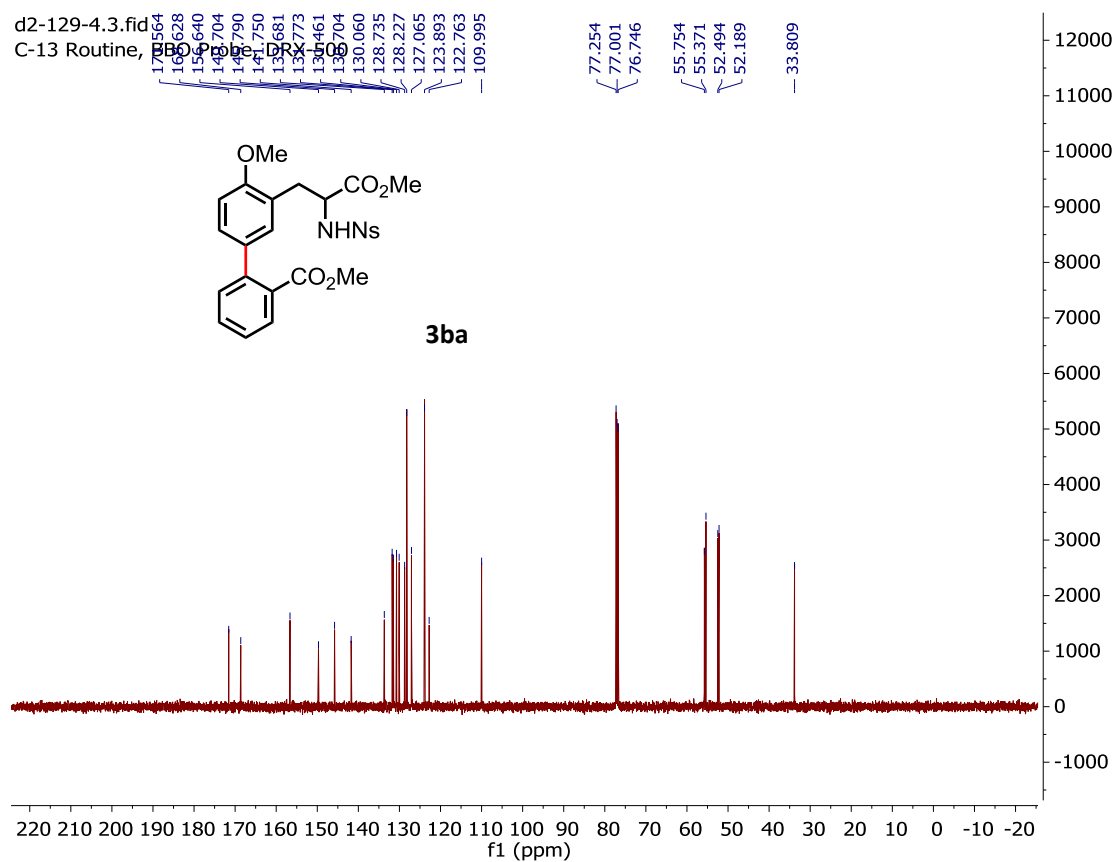

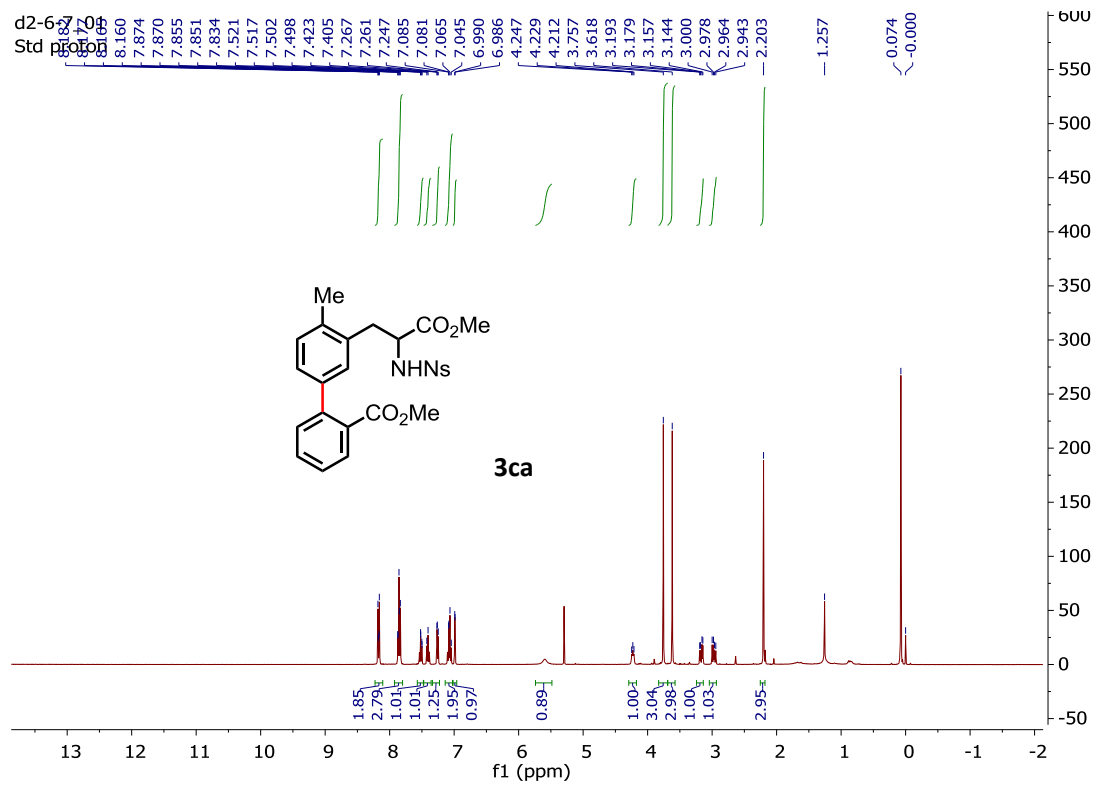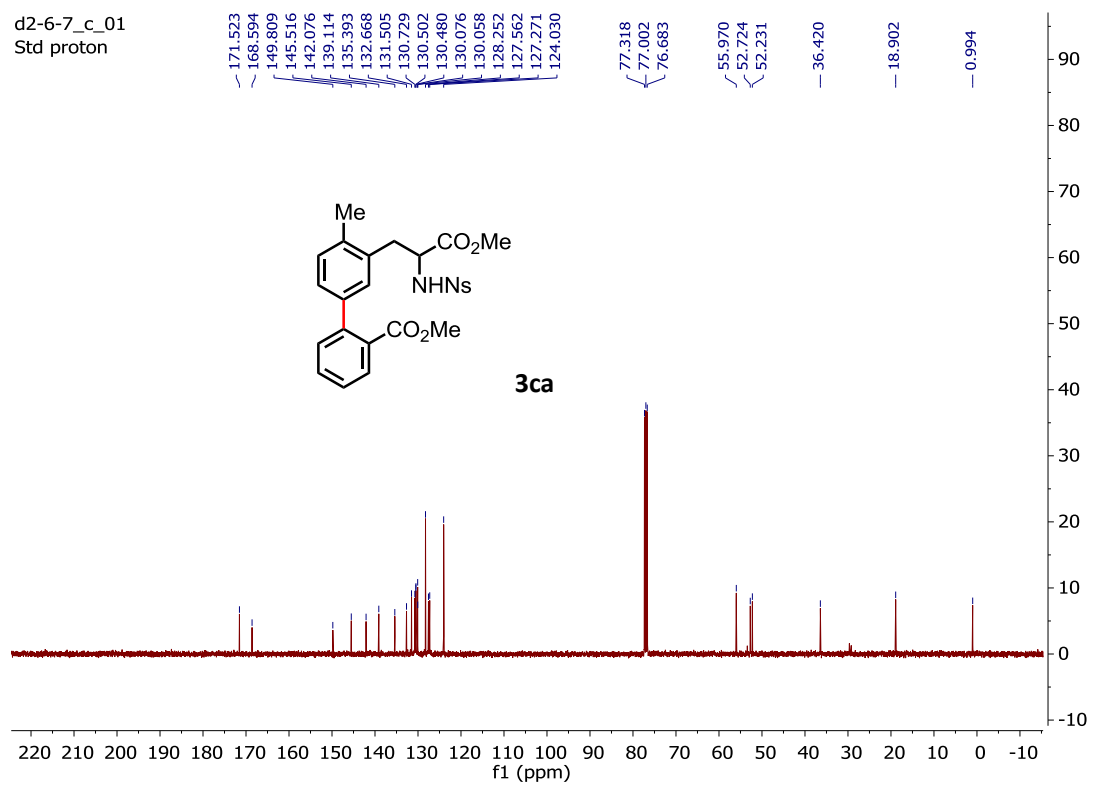

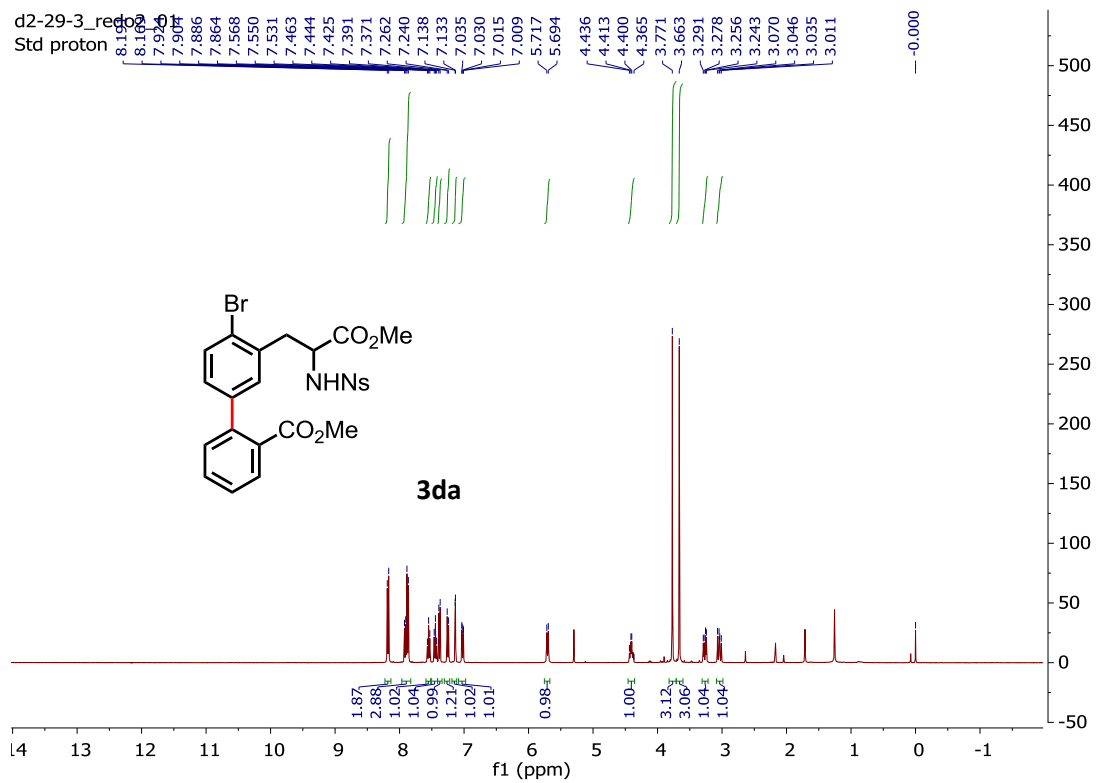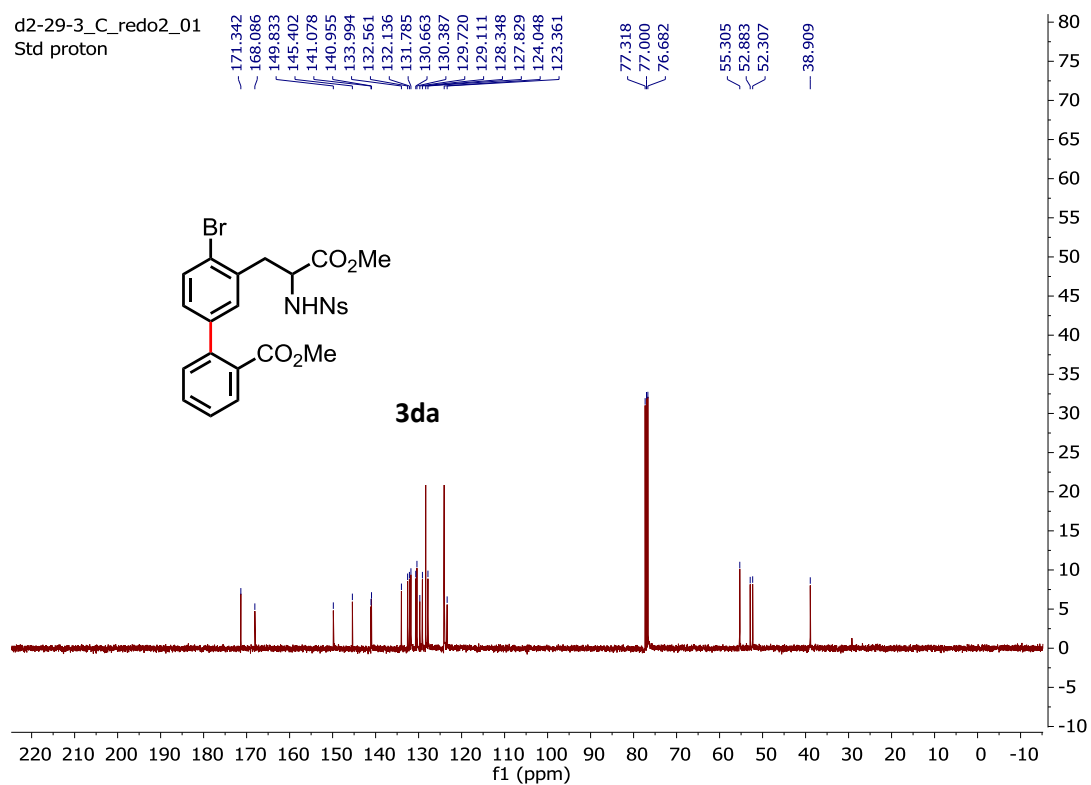

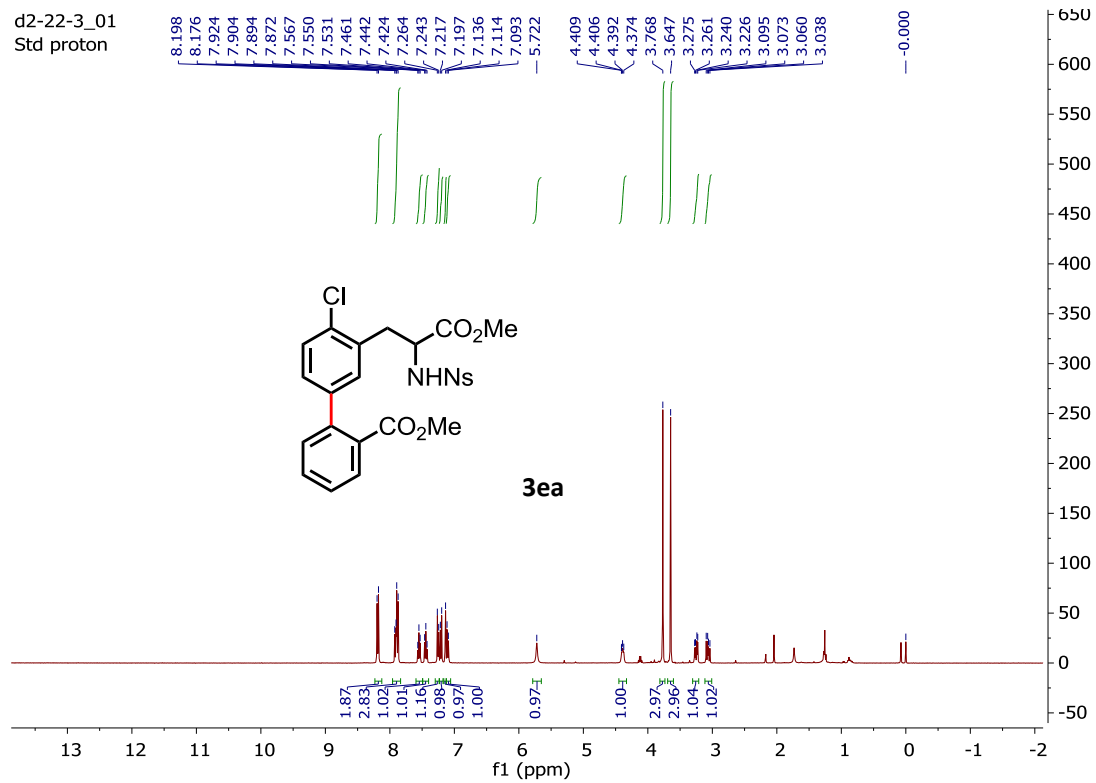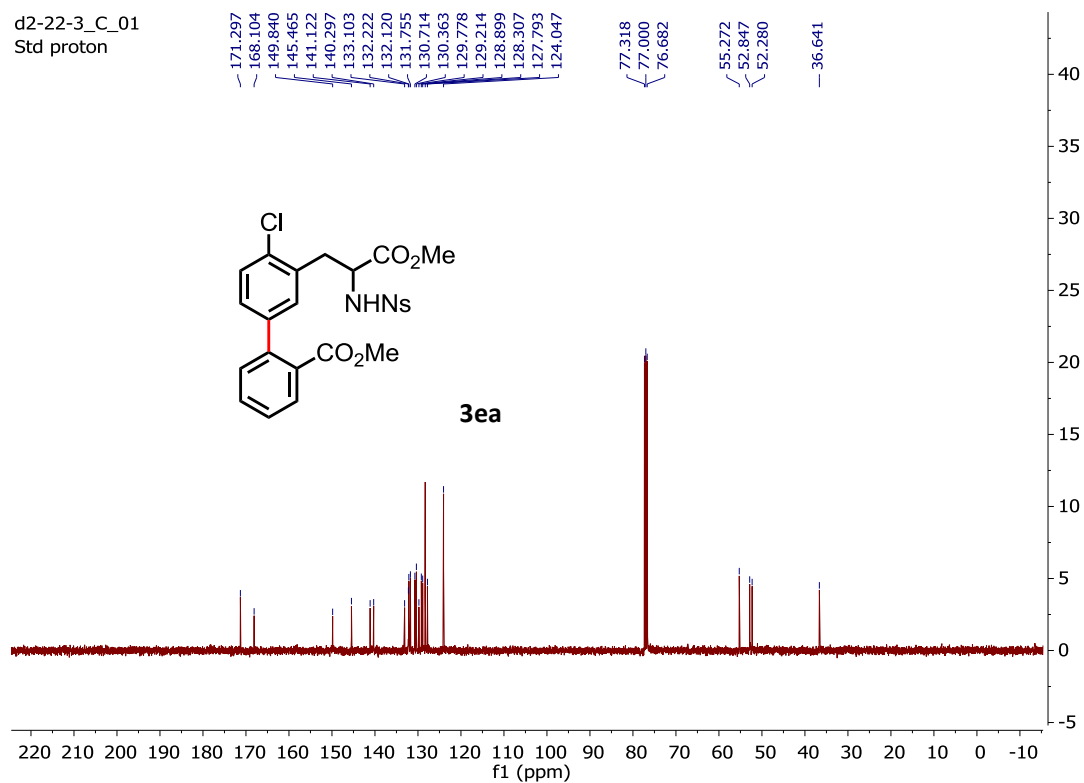



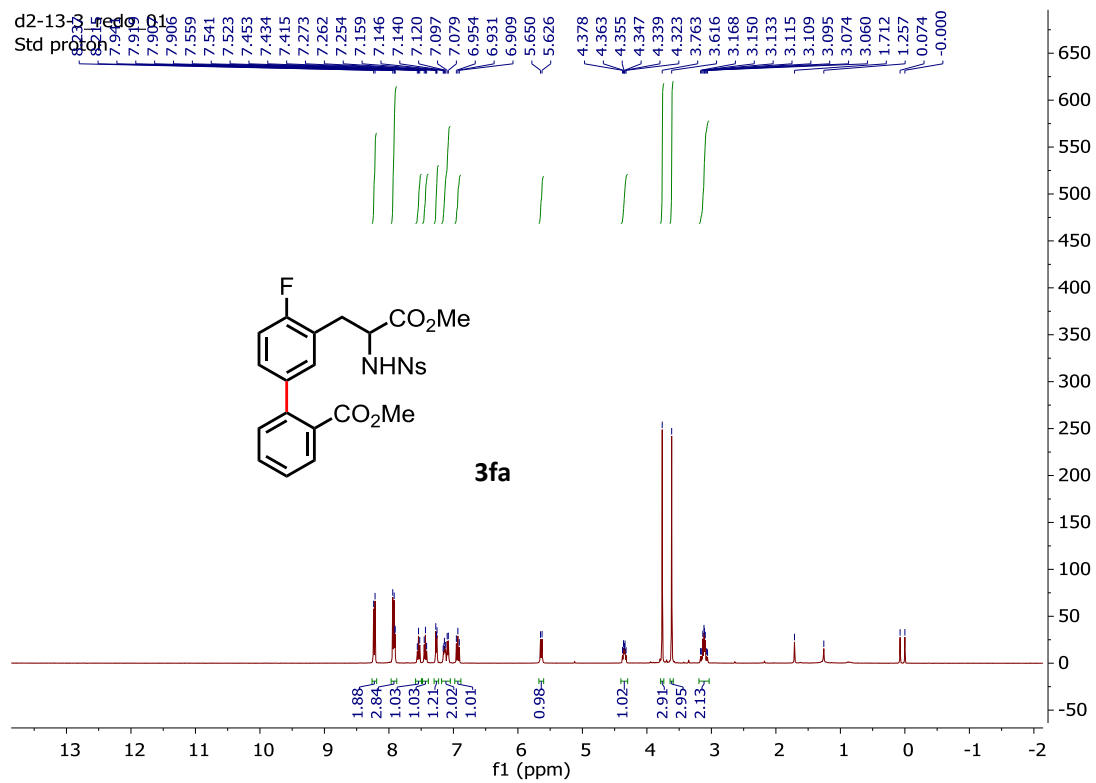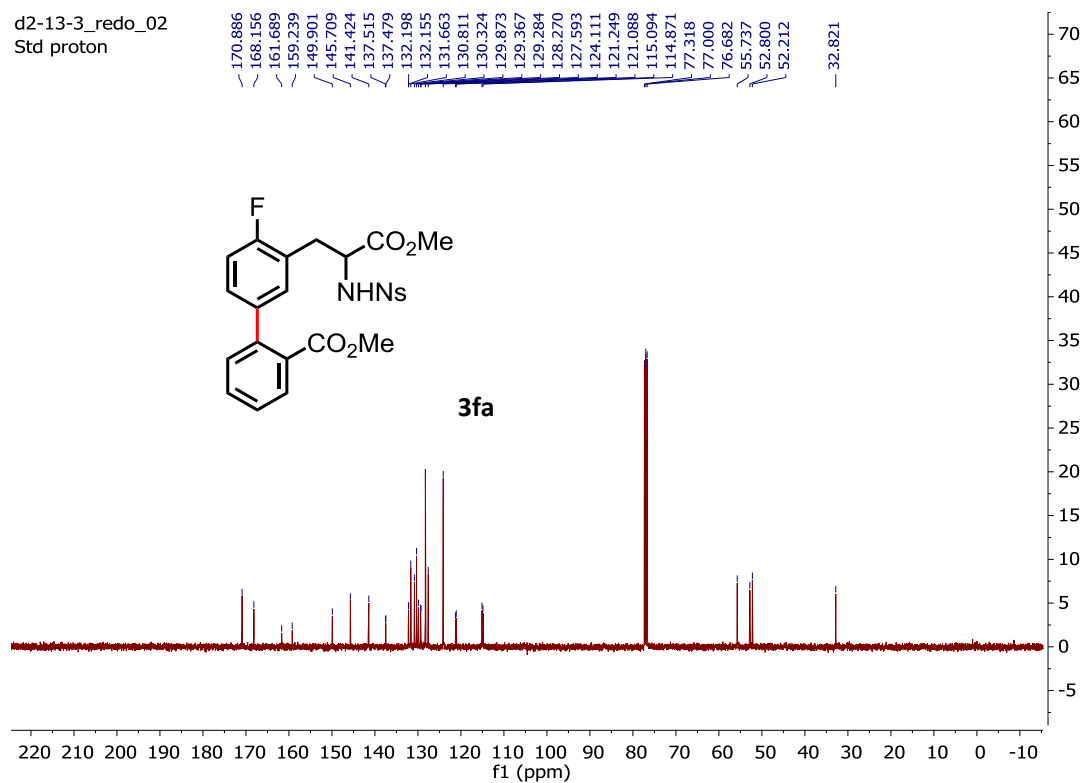

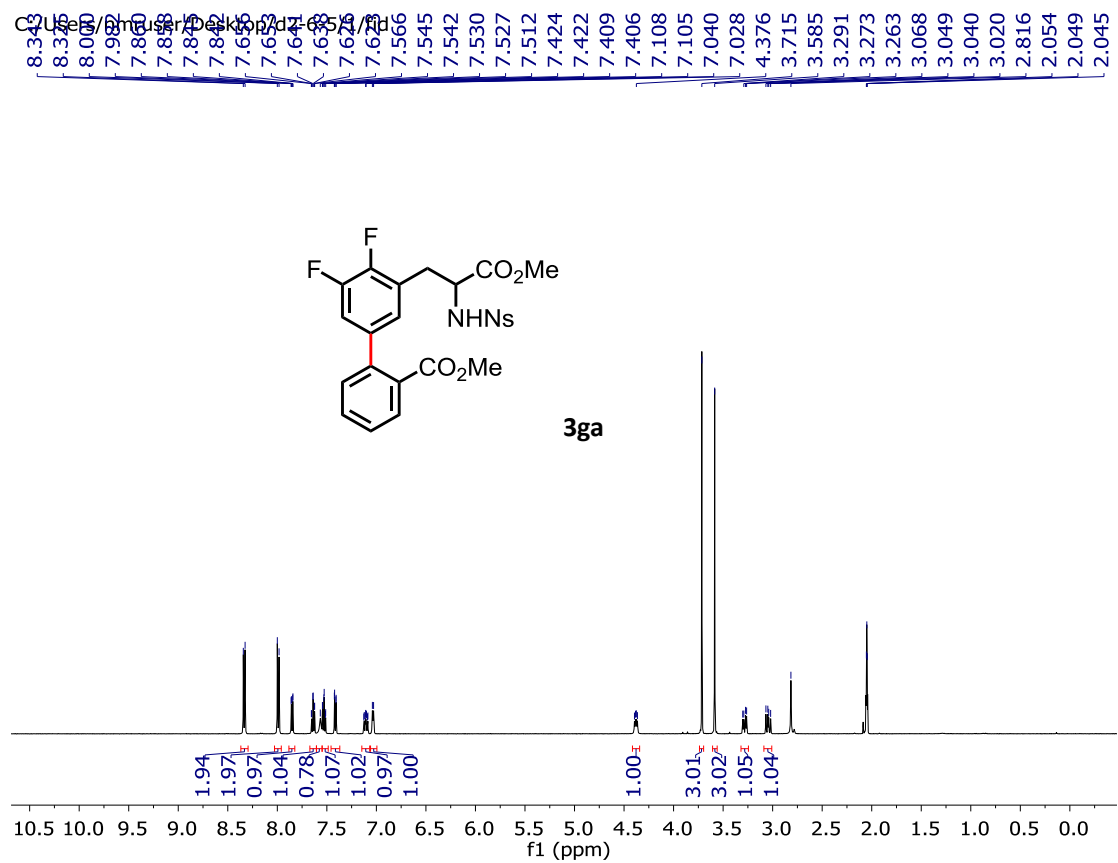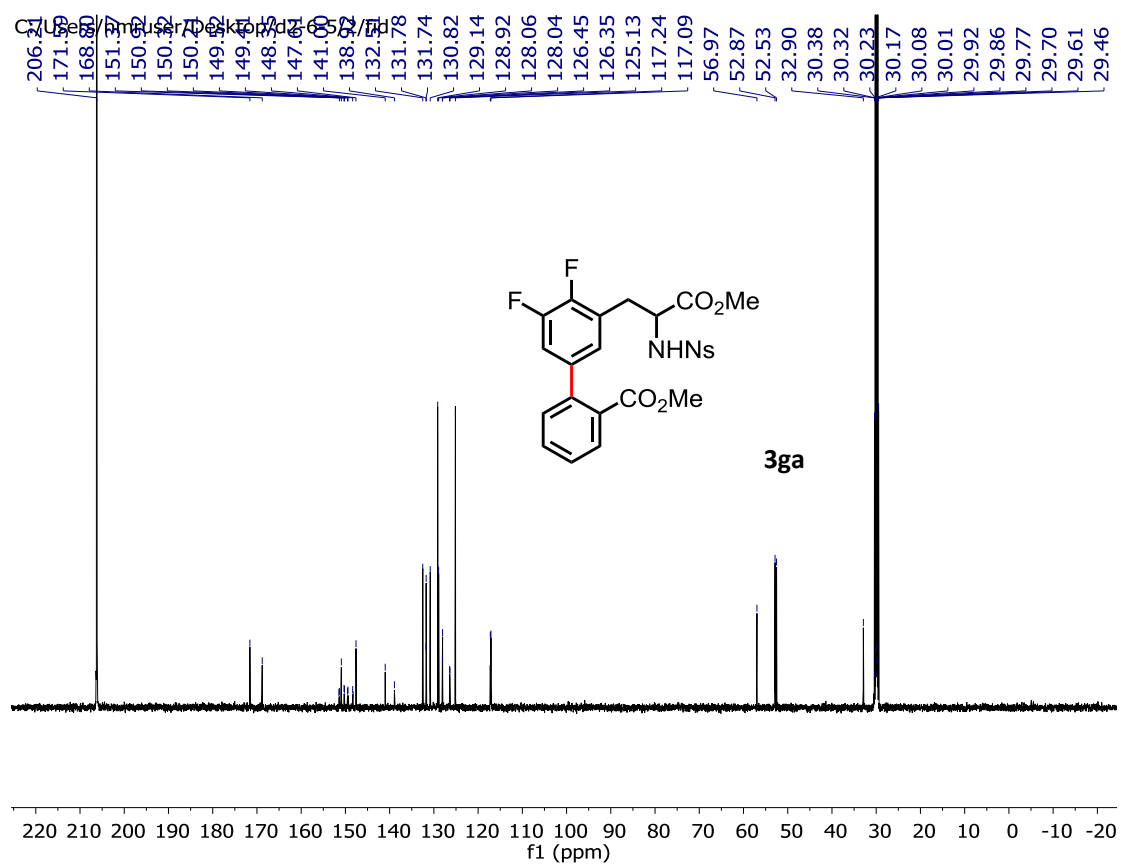

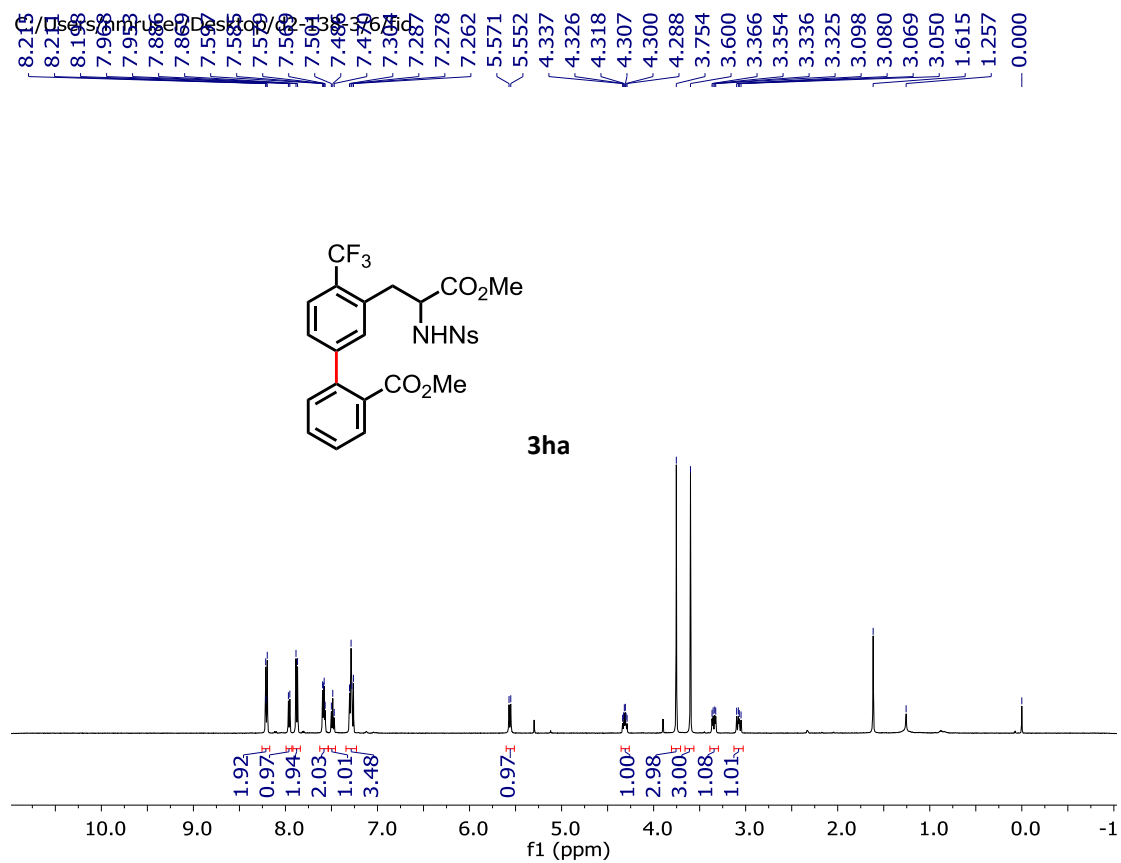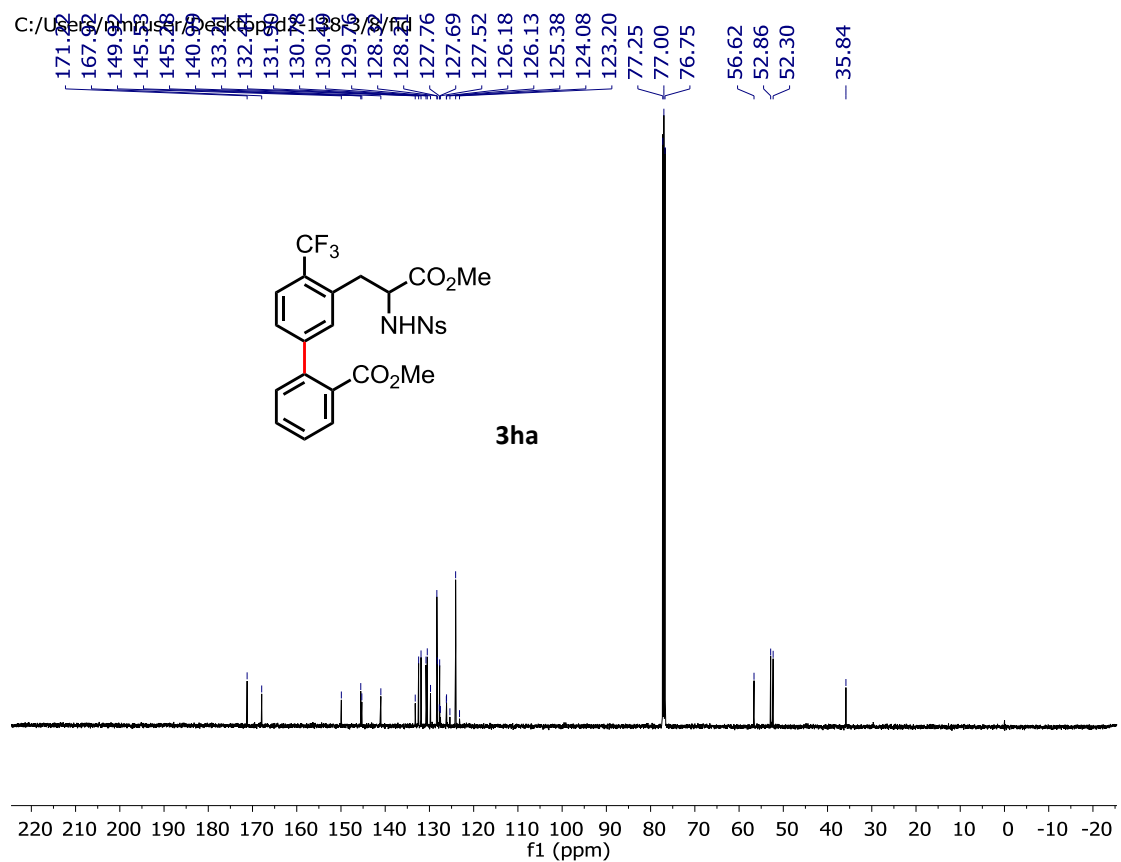

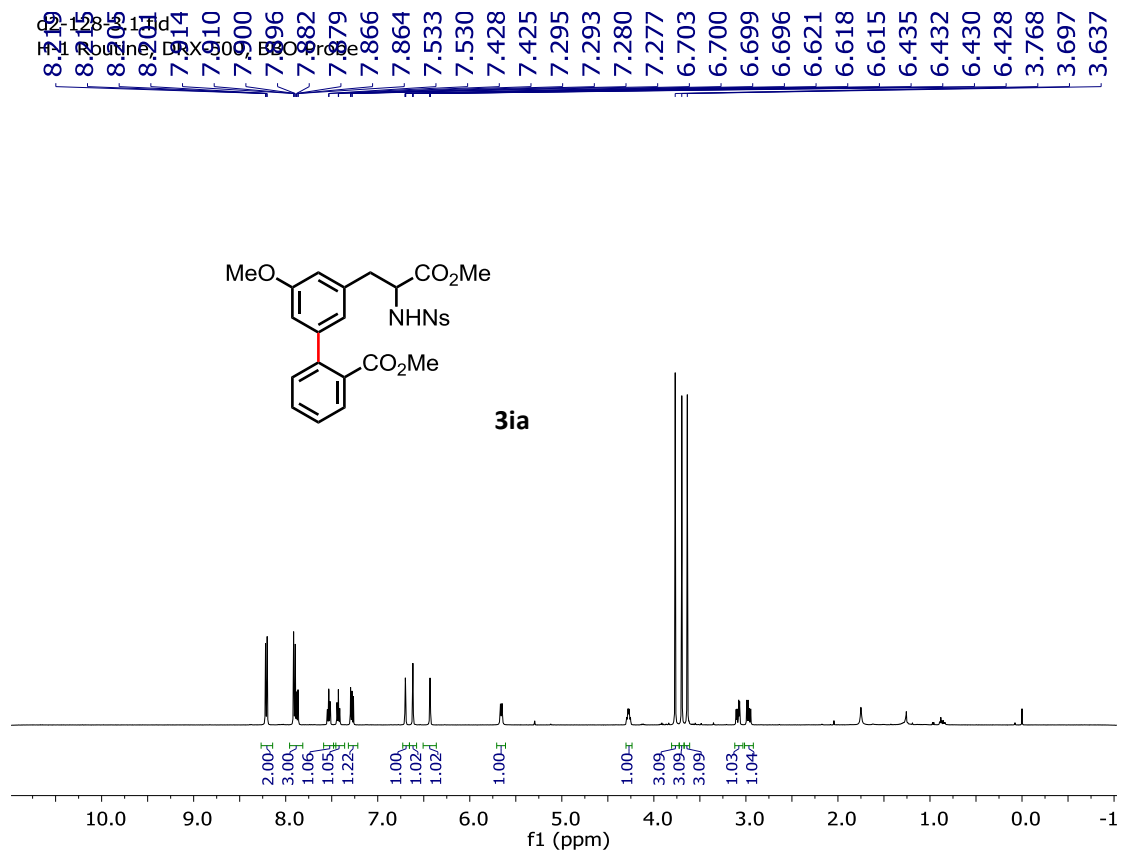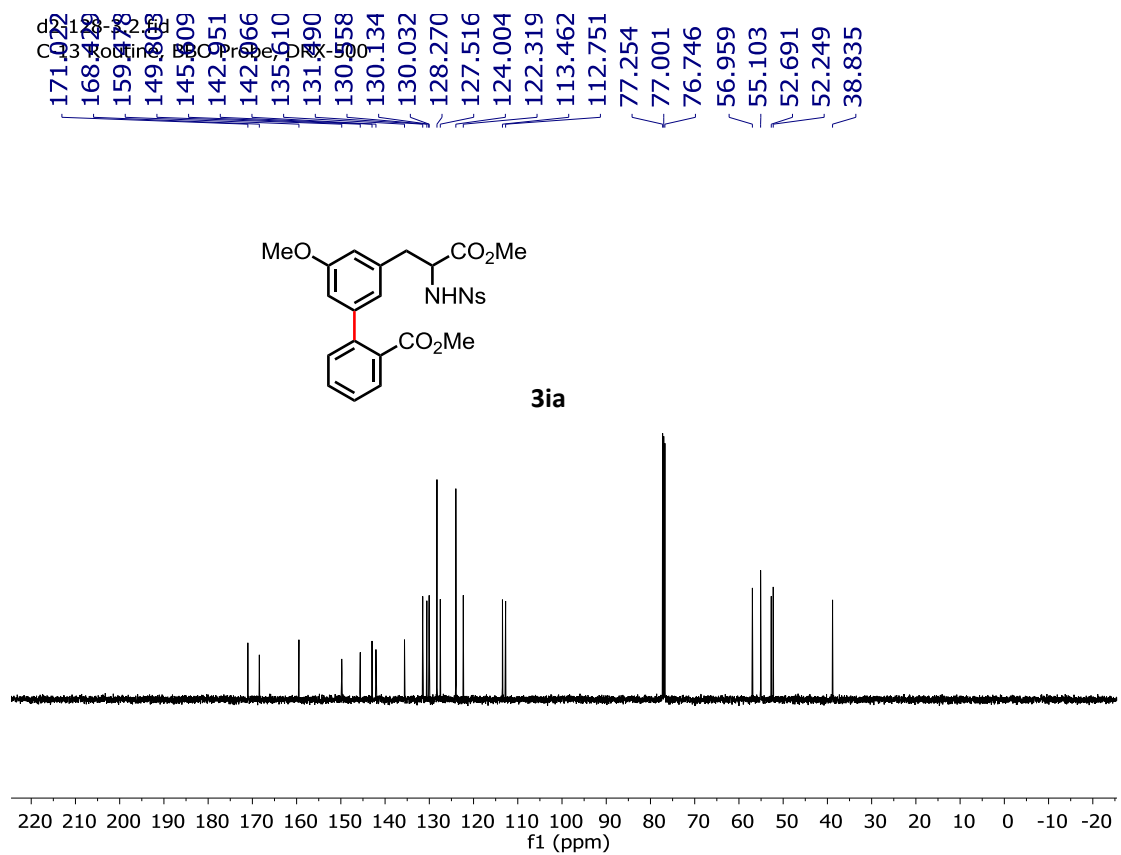

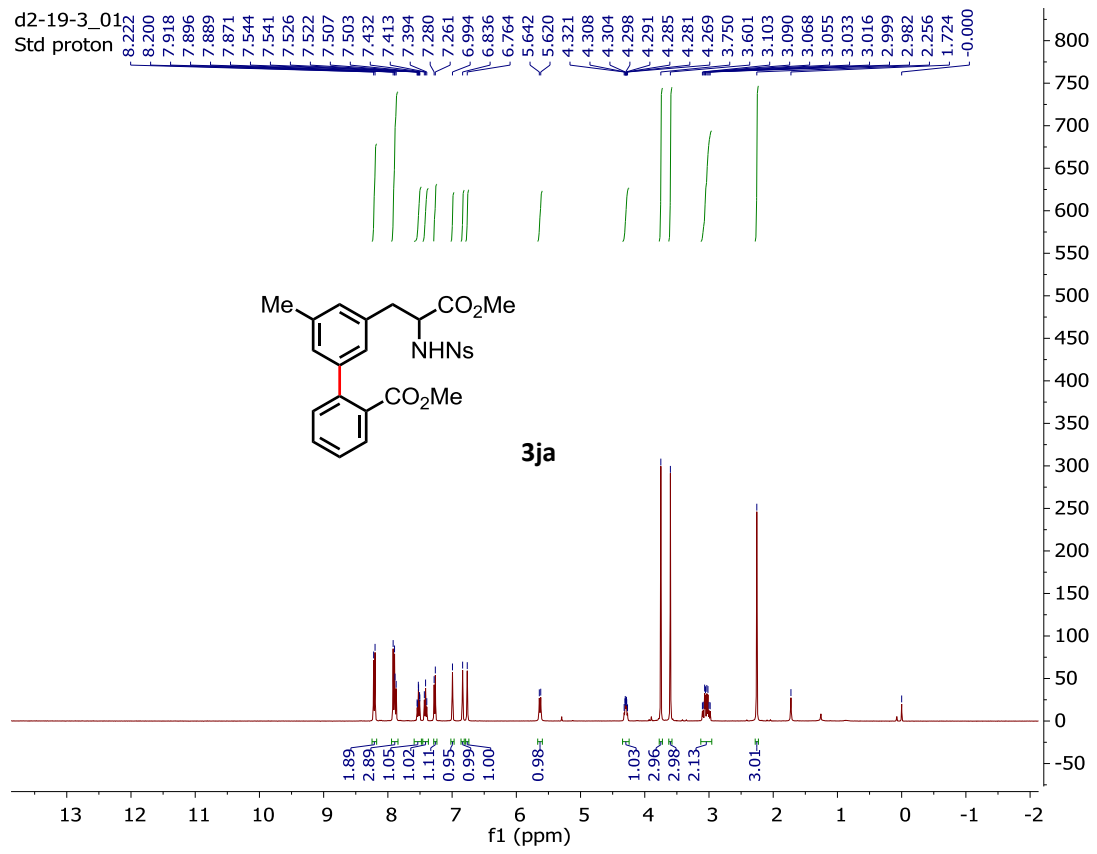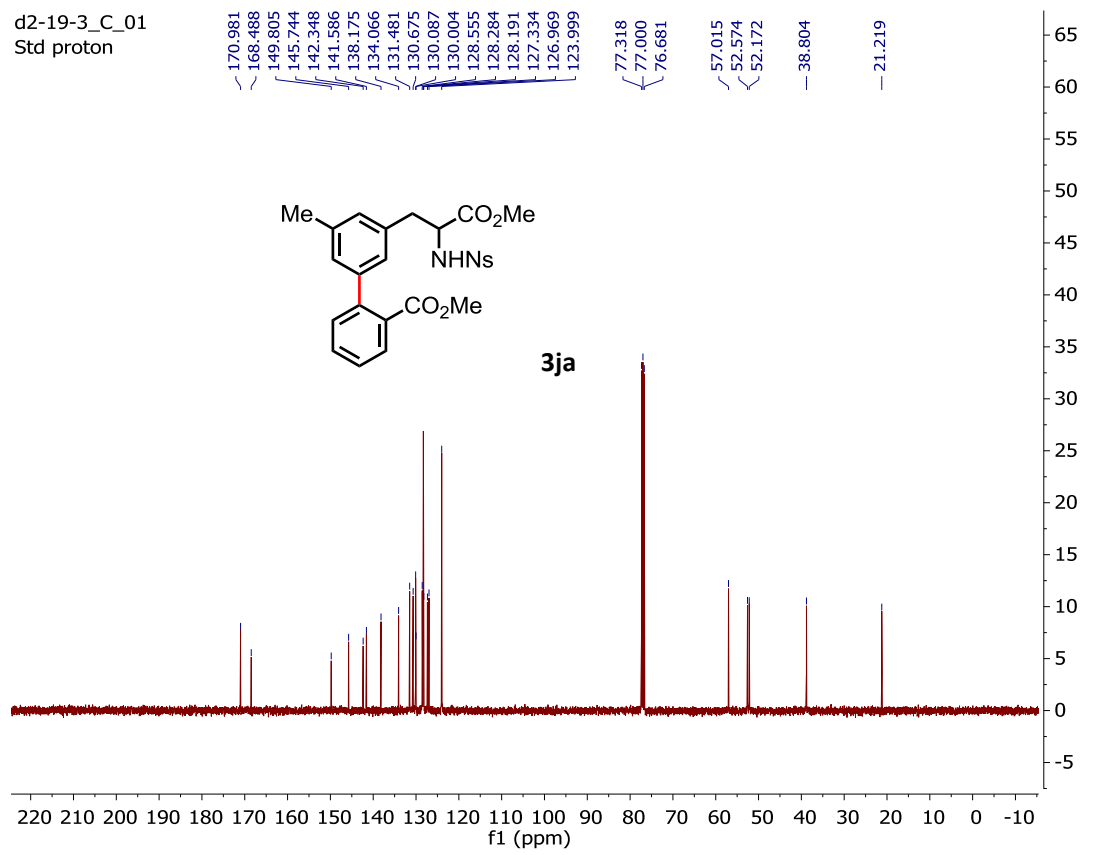

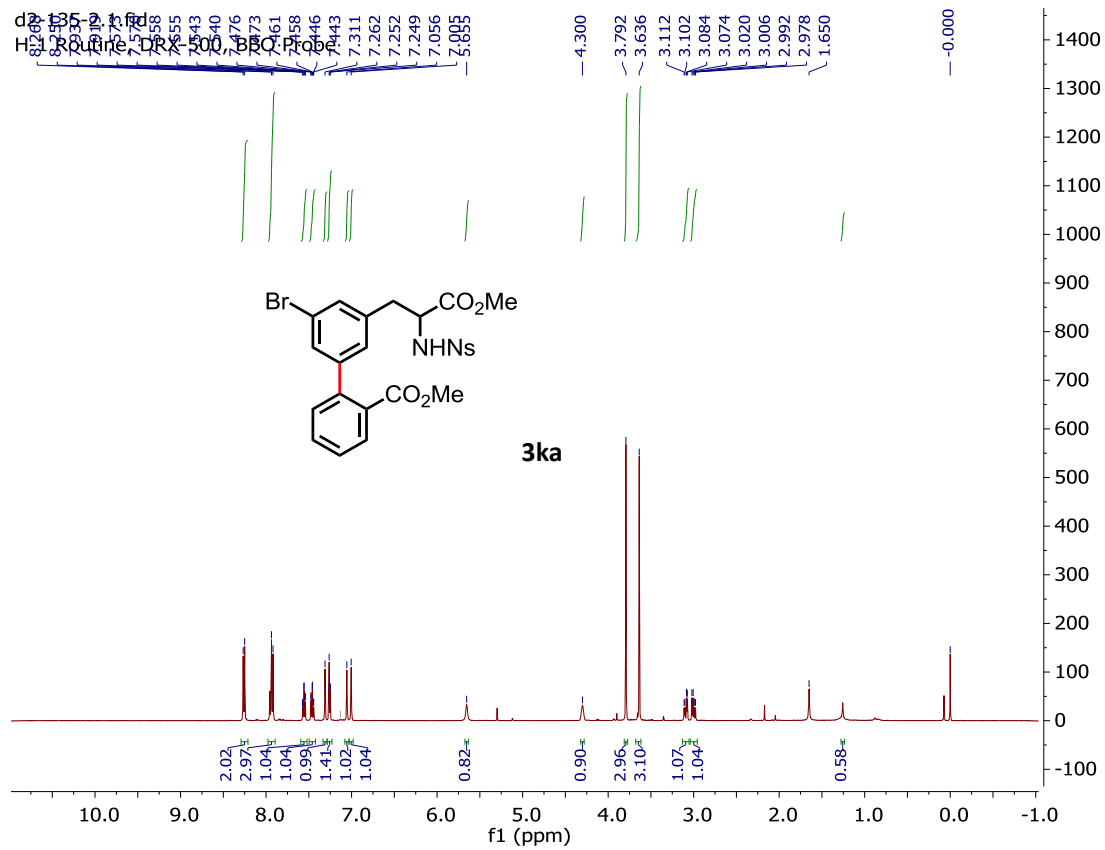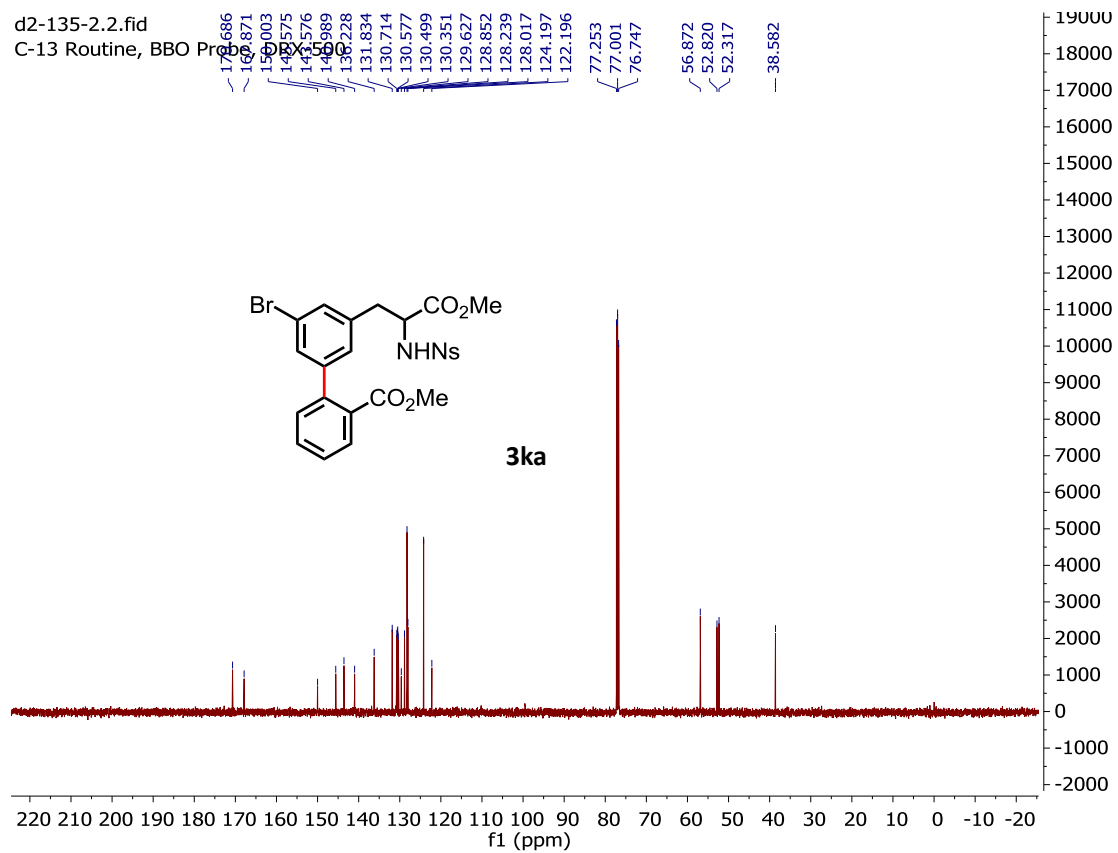

d2-12-3\_01

Std proton

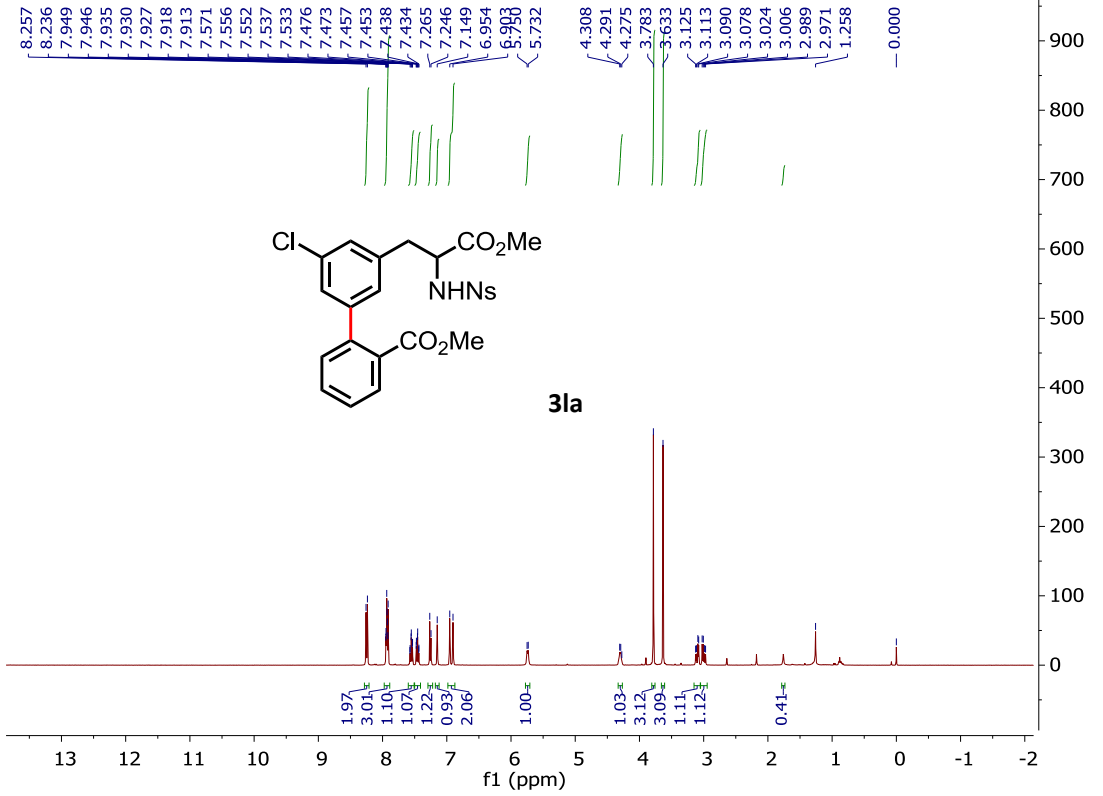

d2-12-3\_C\_01

Std proton

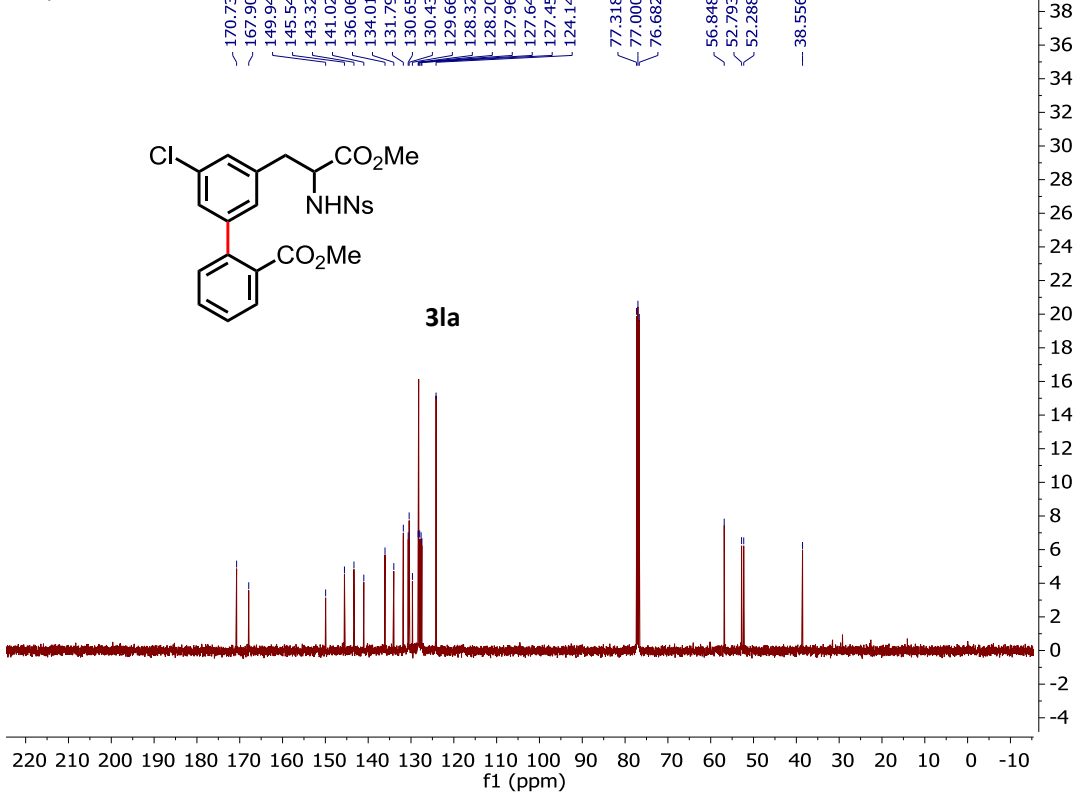

d2-139-3.2.fid  
H-1 Routine, DRX-500, BBO Probe

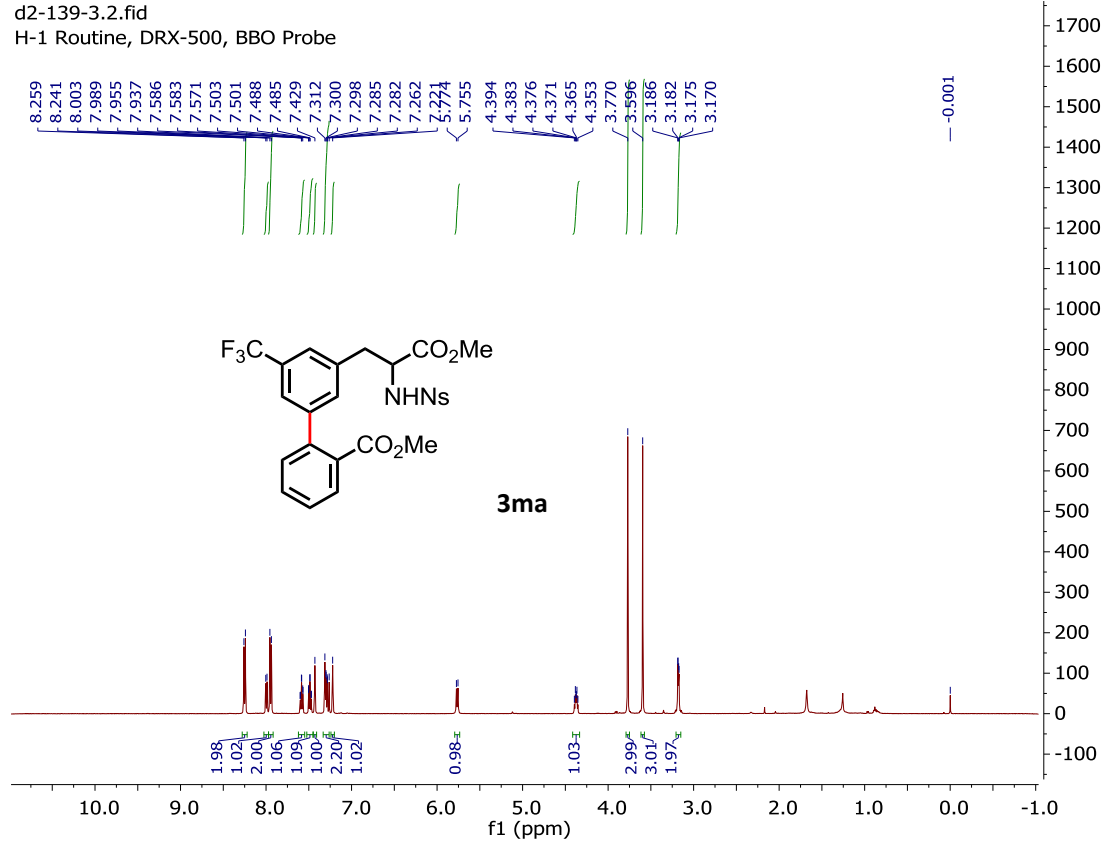

d2-139-3.3.fid  
C-13 Routine, BBO Probe, DRX-500

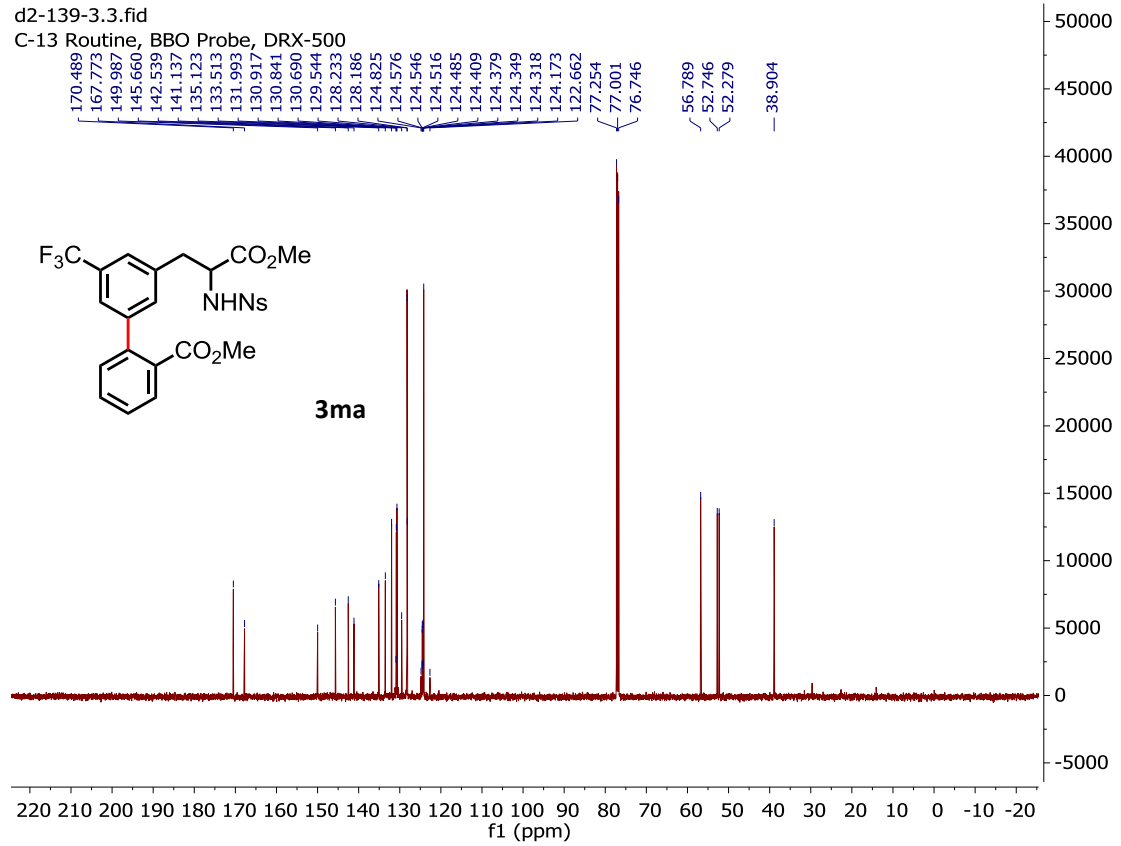



d2-14-3-1ppp\_01  
Std proton

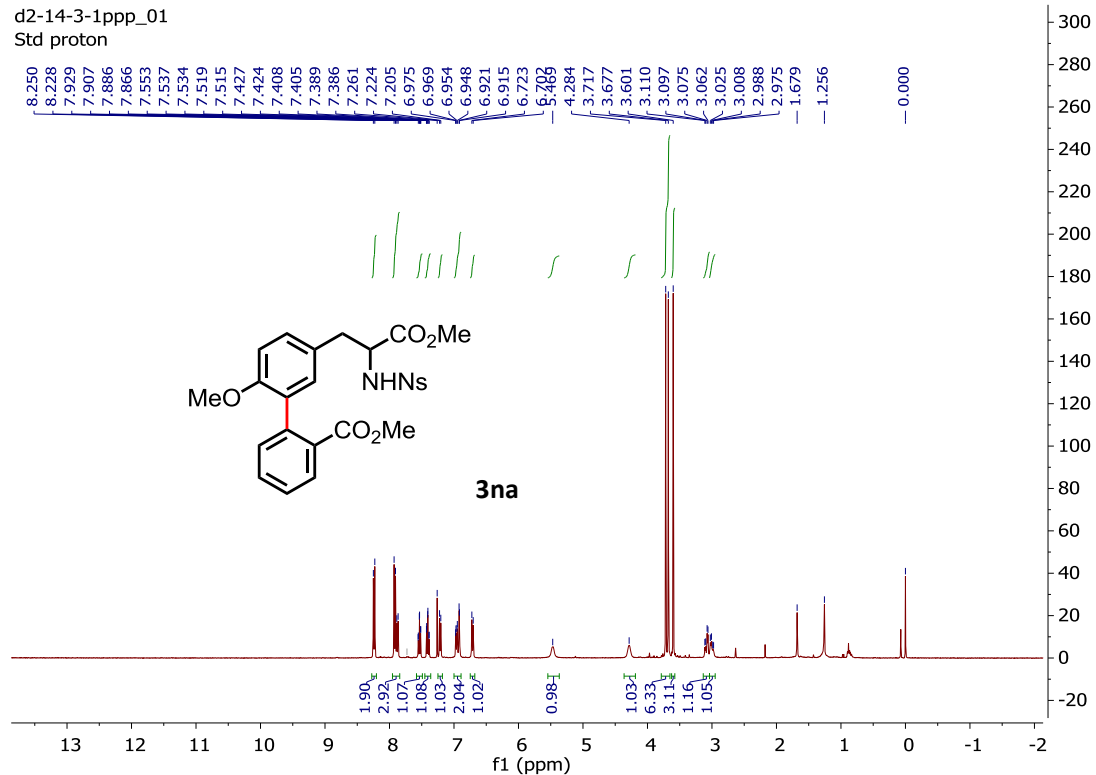

d2-14-3-1ppp\_C\_01  
Std proton

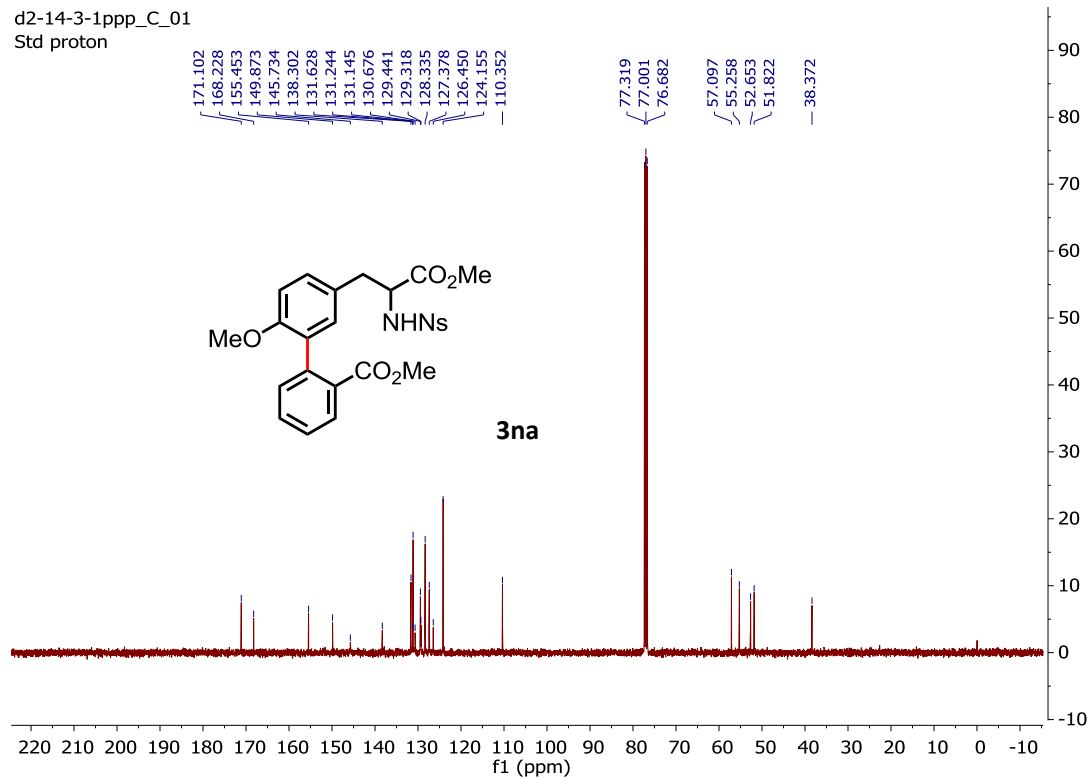

d2-66-3-2\_redo\_01

Std proton

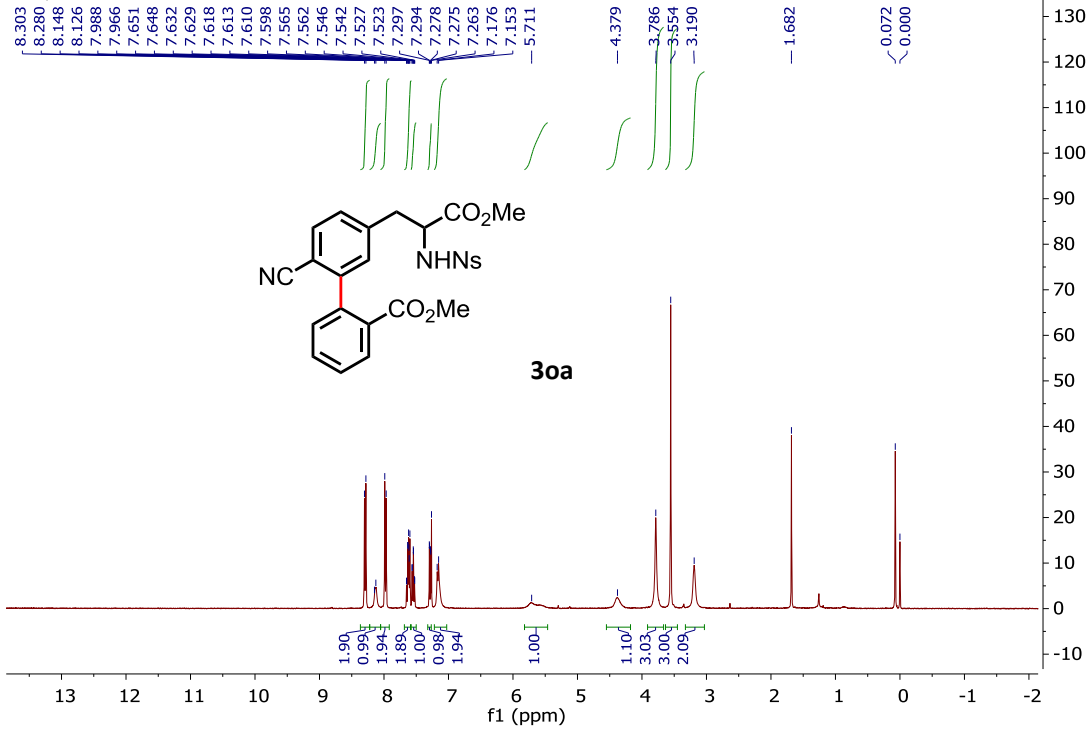

d2-2-66-3-2.2.fid

C-13 Routine, BBO Probe, DRX-500

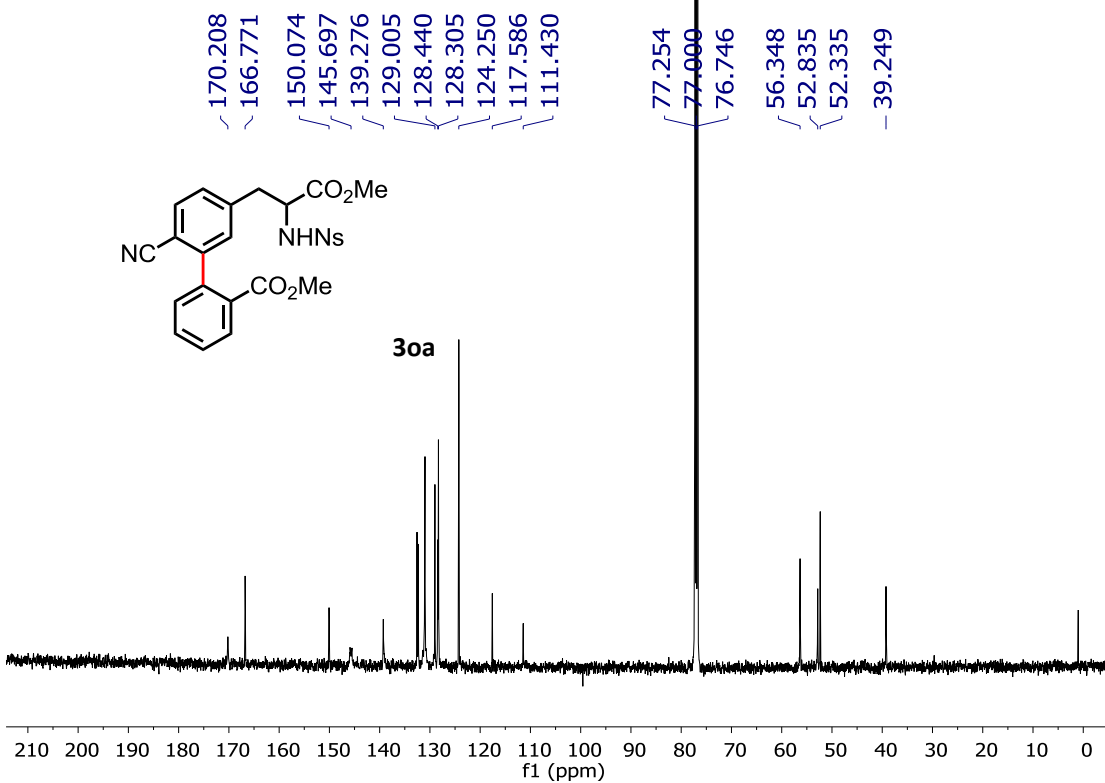

d2-6-4-2\_01  
Std proton

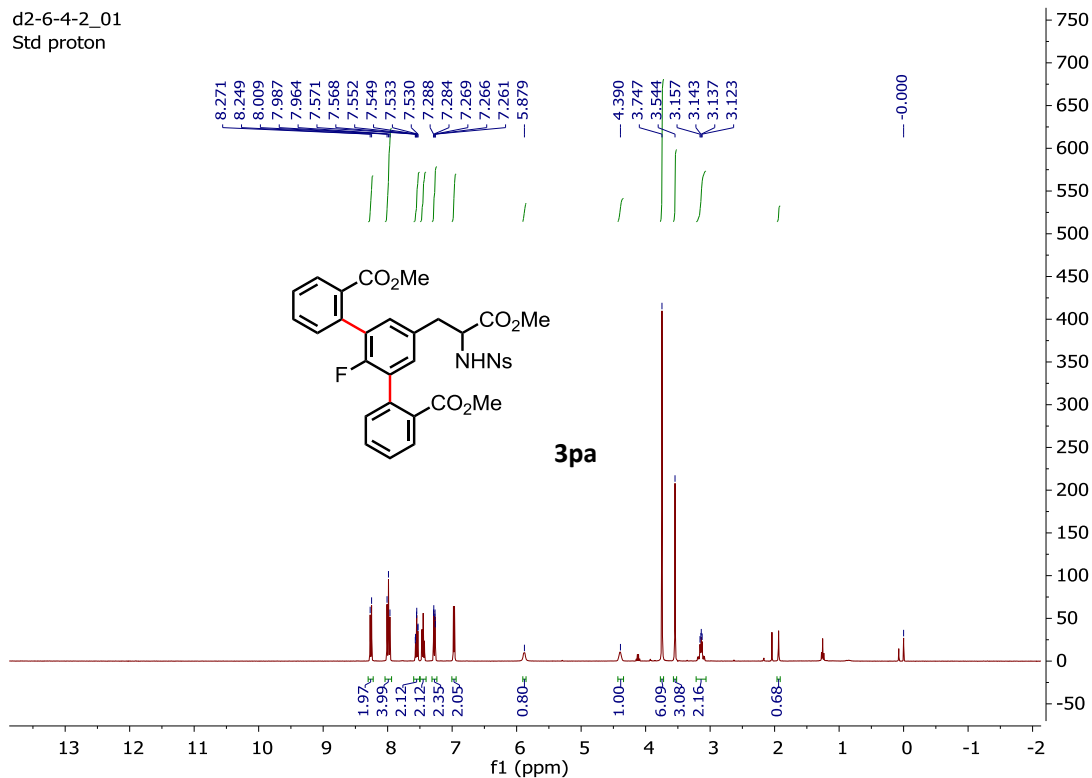

d2-6-4-2\_C\_01  
Std proton

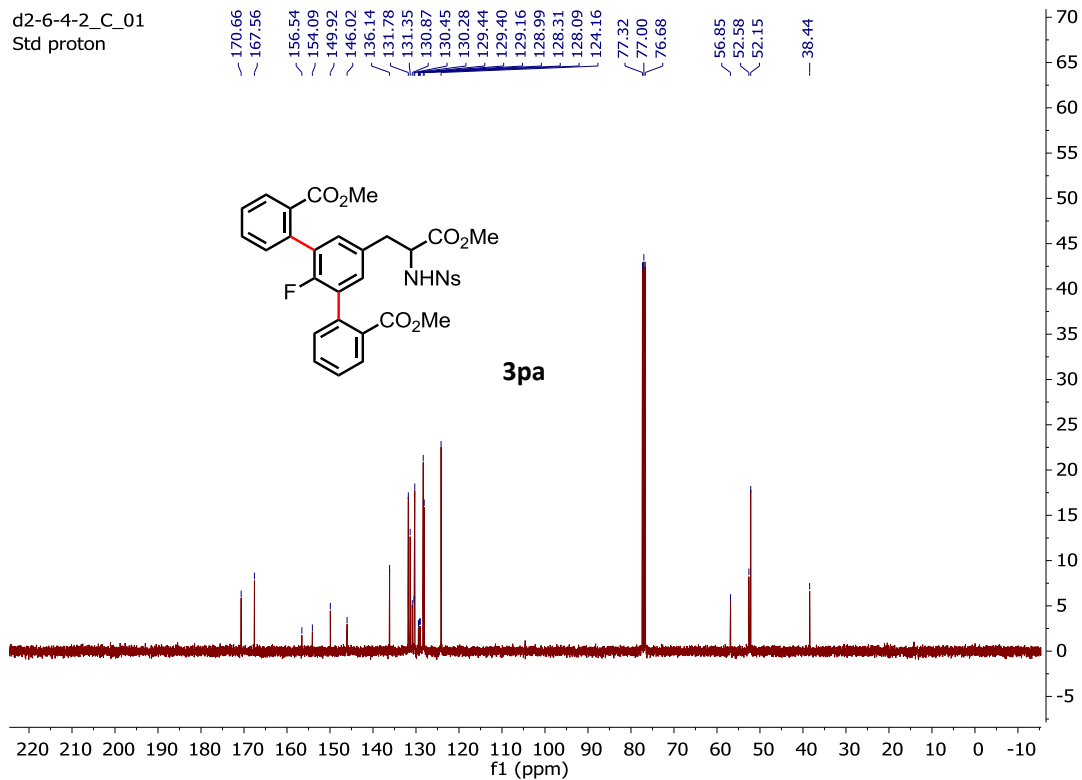

C:/Users/nmruser/Desktop/d2-142-1-1/1/fid

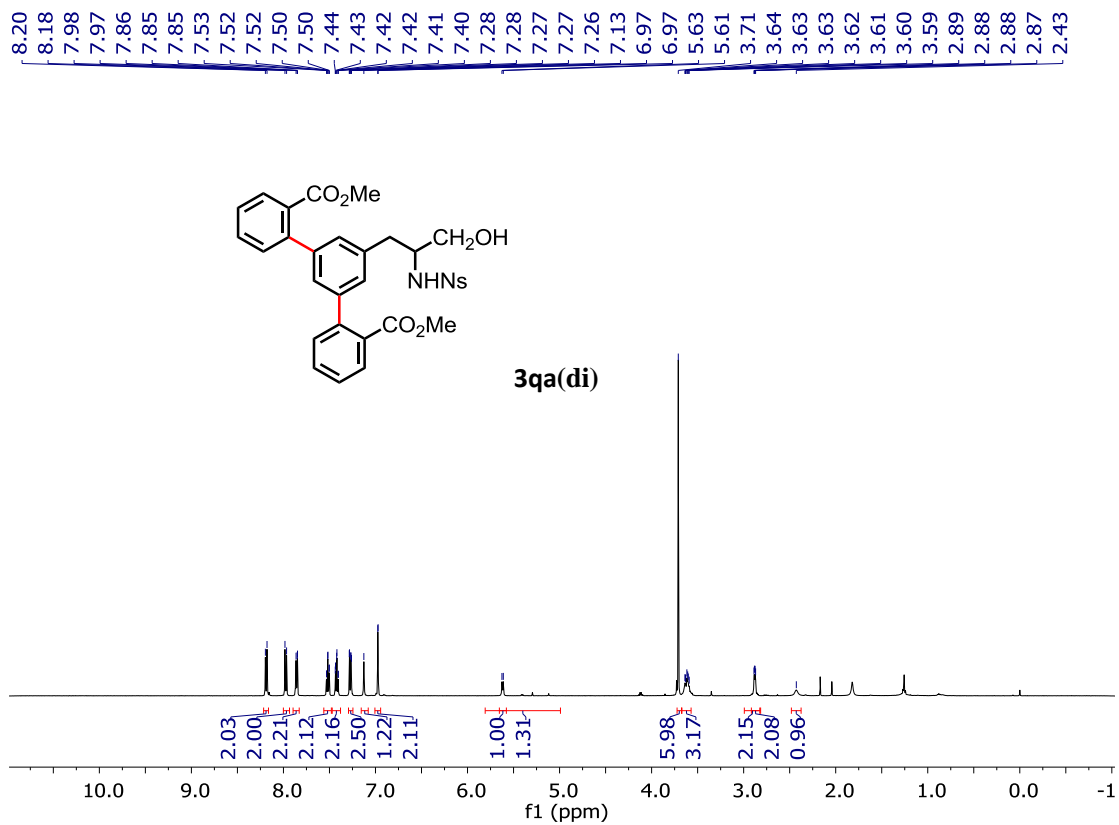

C:/Users/nmruser/Desktop/d2-142-1-1/2/fid

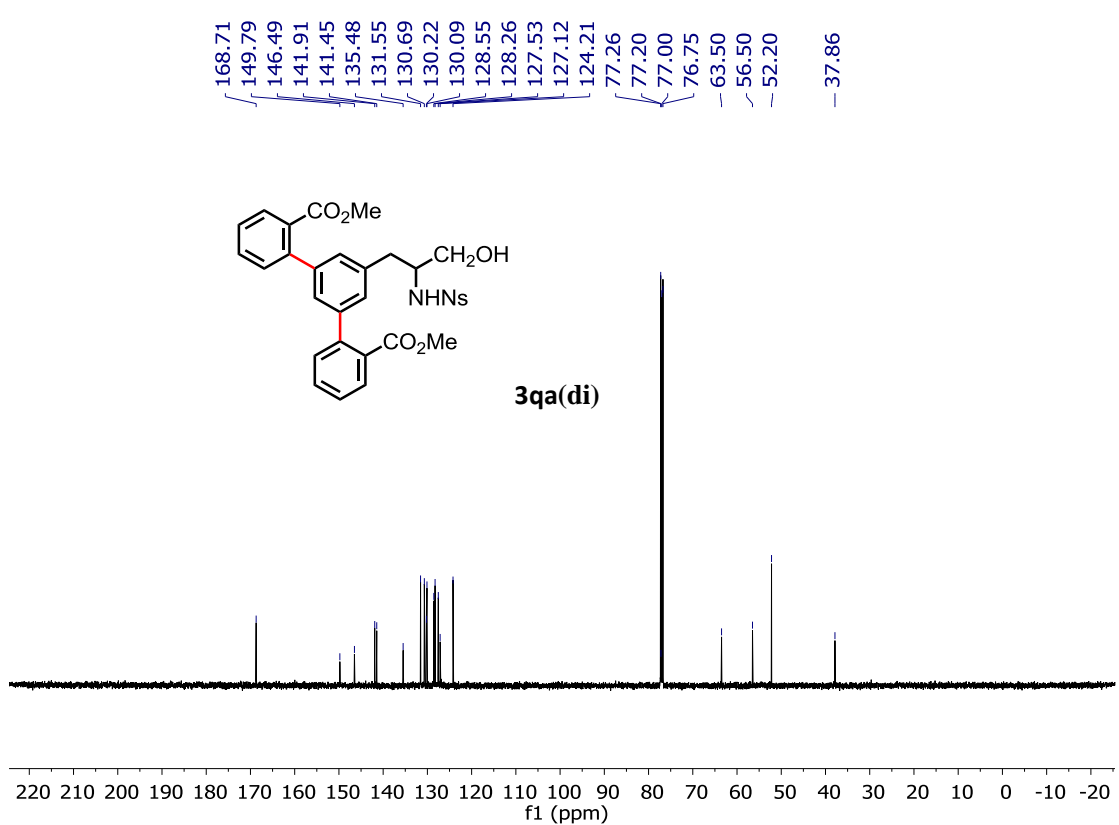

C:/Users/nmruser/Desktop/d2-142-1-2/2/fid

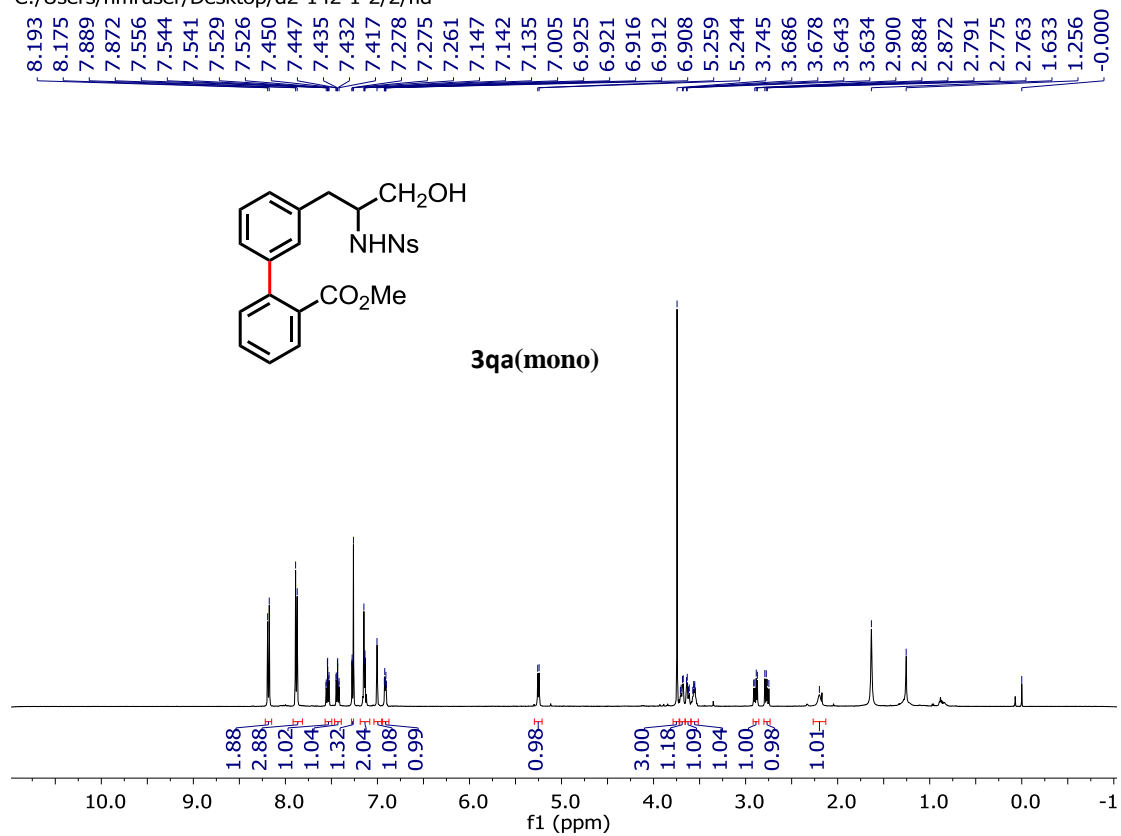

C:/Users/nmruser/Desktop/d2-142-1-2/3/fid

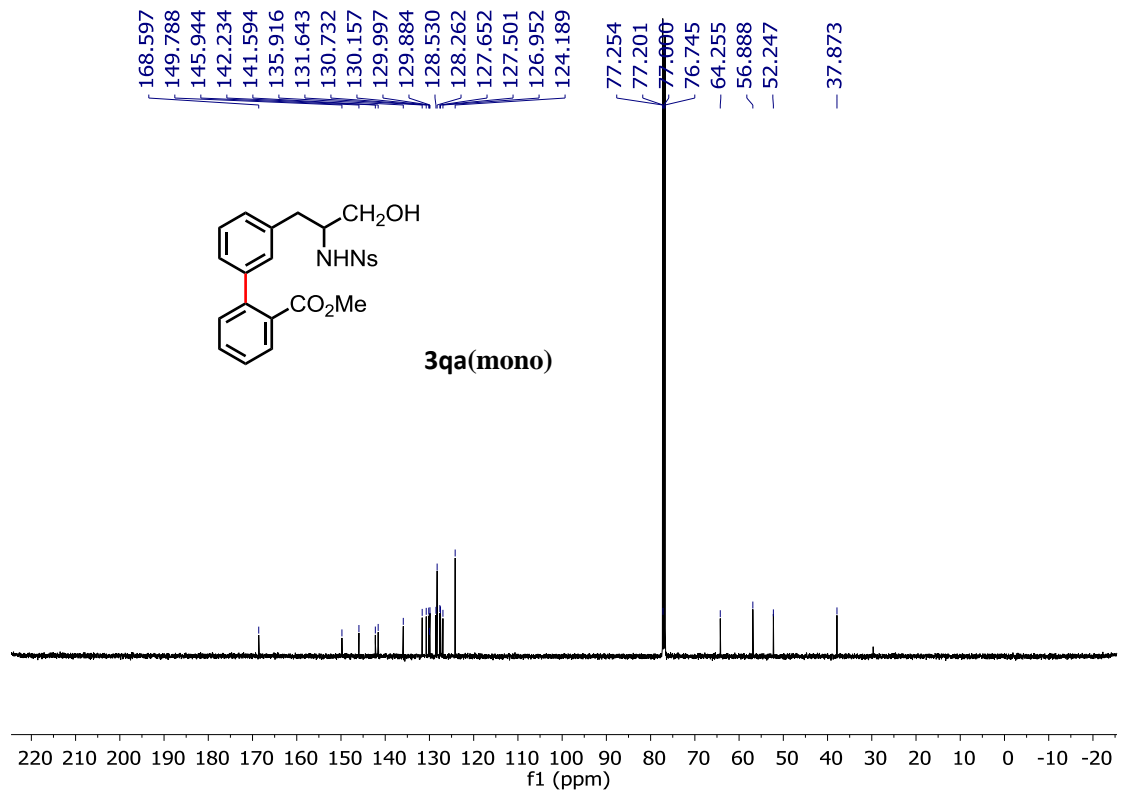

d2-137-3.1.fid  
H-1 Routine, DRX-500, BBO Probe

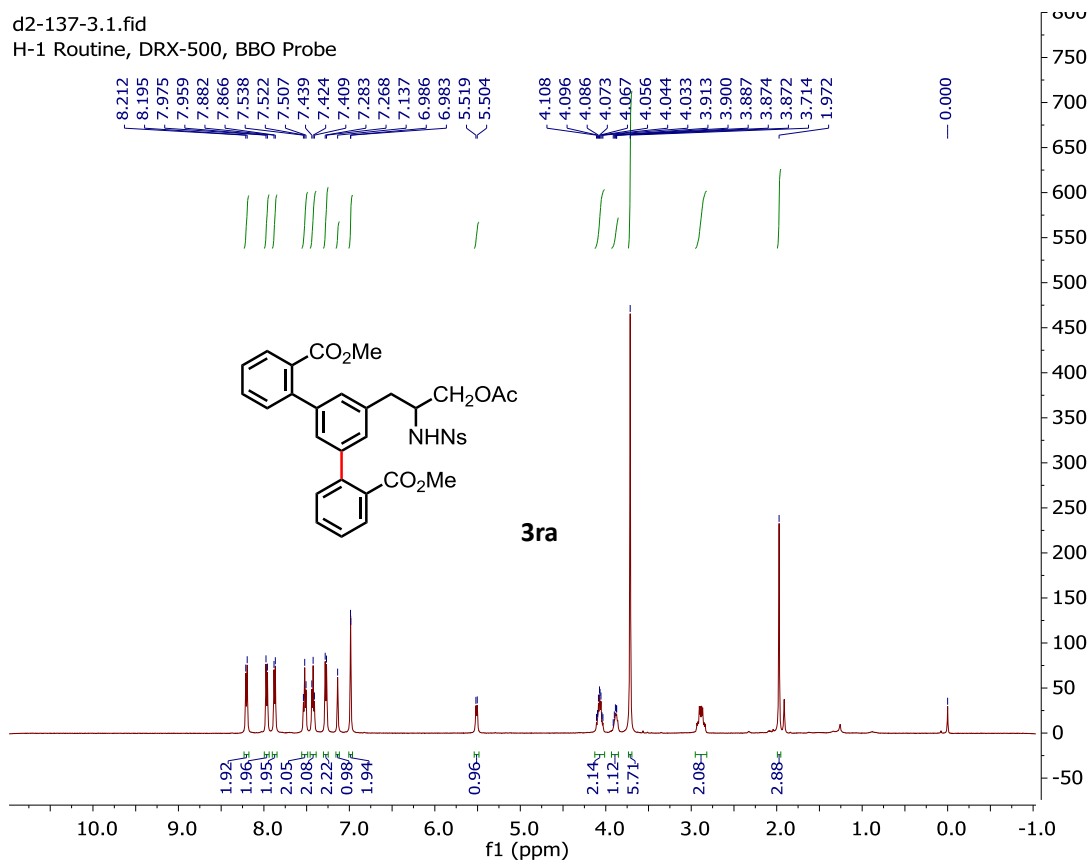

d2-137-3.2.fid  
C-13 Routine, BBO Probe

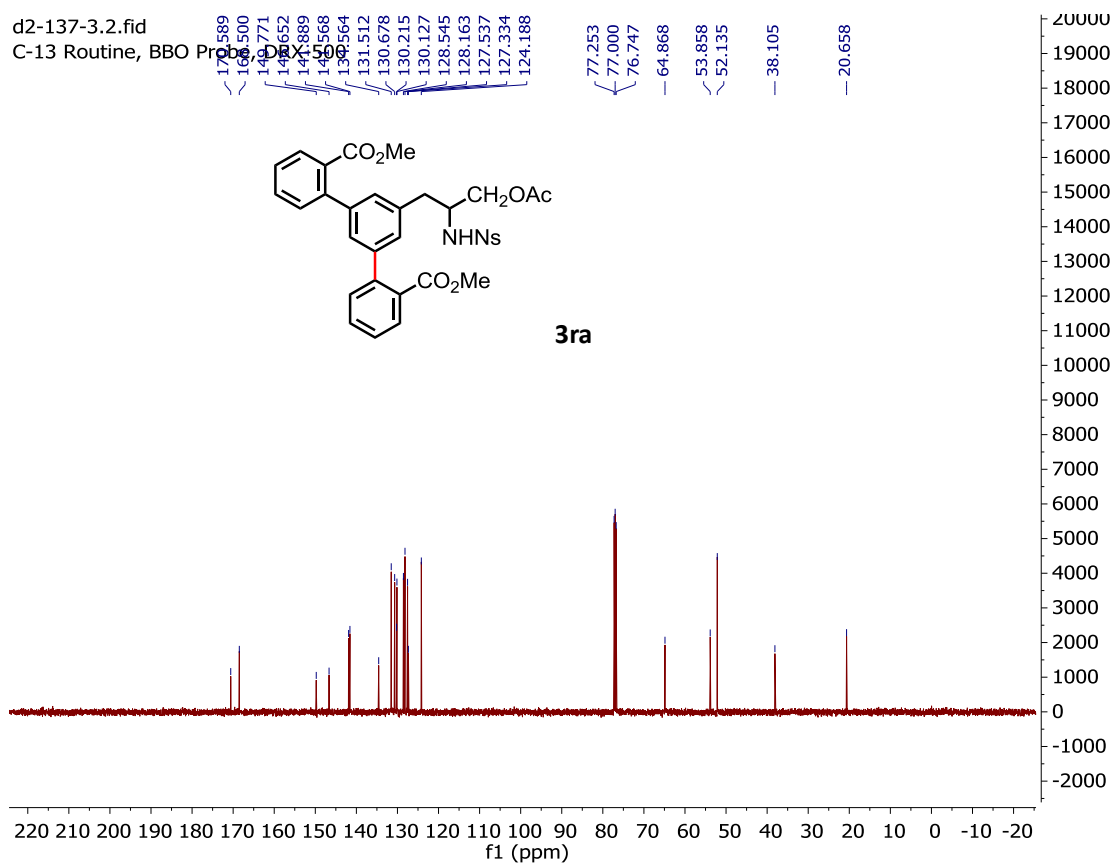

C:/Users/nmruser/Desktop/d2-151-3-2/1/fid

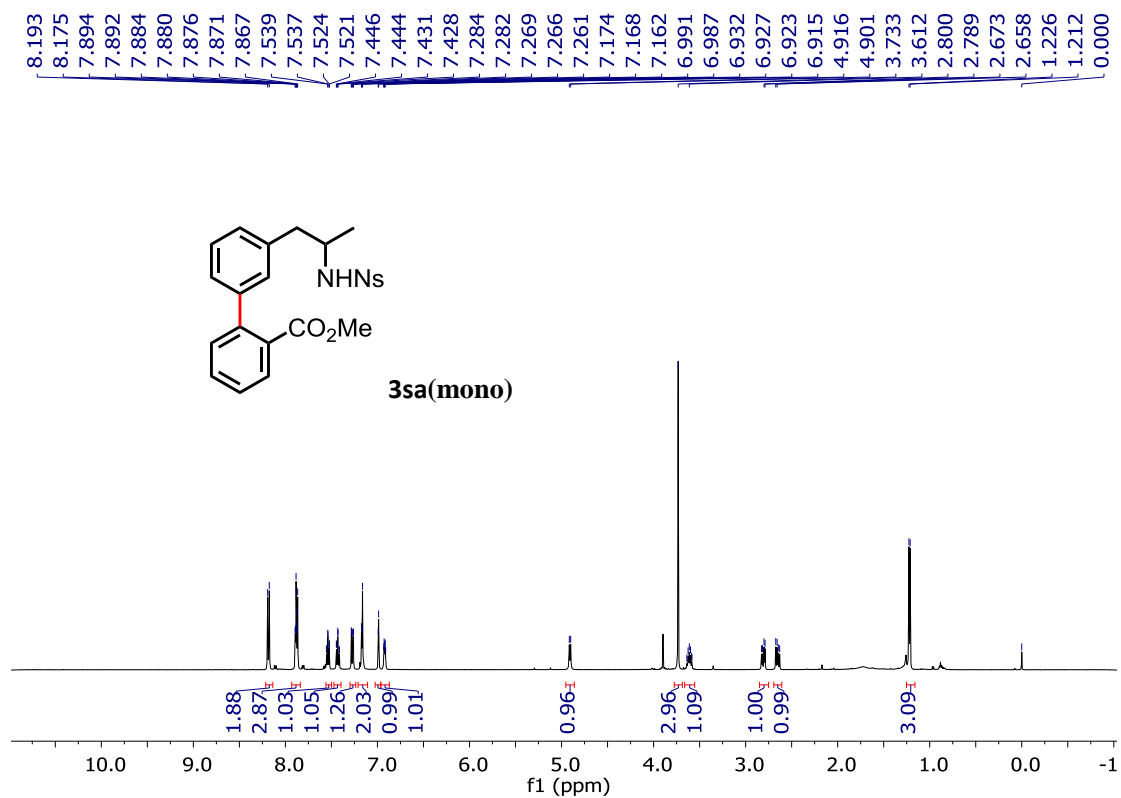

C:/Users/nmruser/Desktop/d2-151-3-2/2/fid

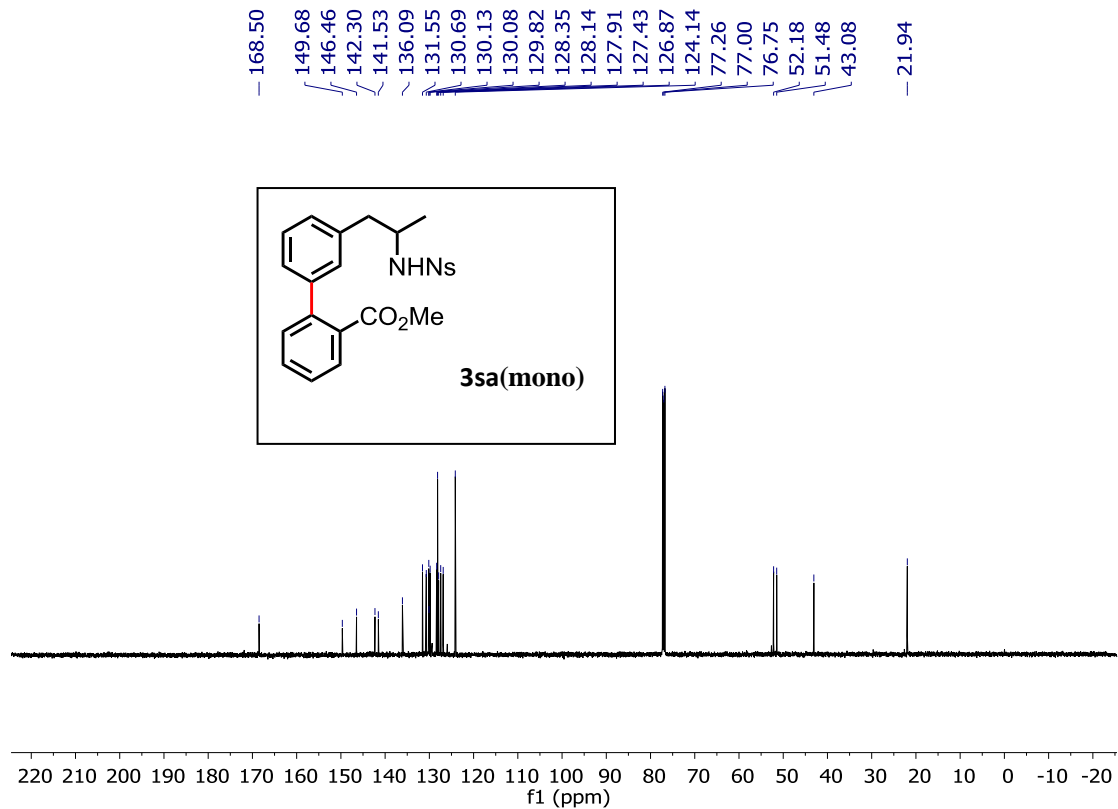

C:/Users/nmruser/Desktop/d2-151-3-1/1/fid

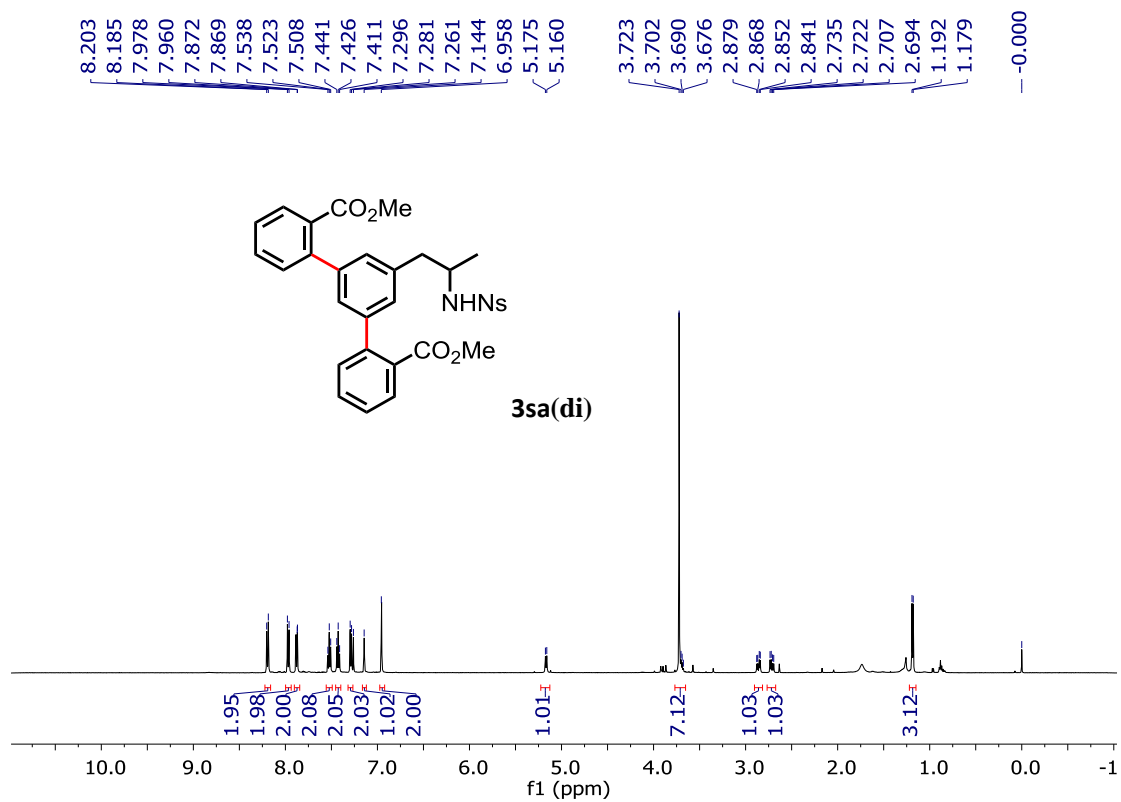

C:/Users/nmruser/Desktop/d2-151-3-1/2/fid

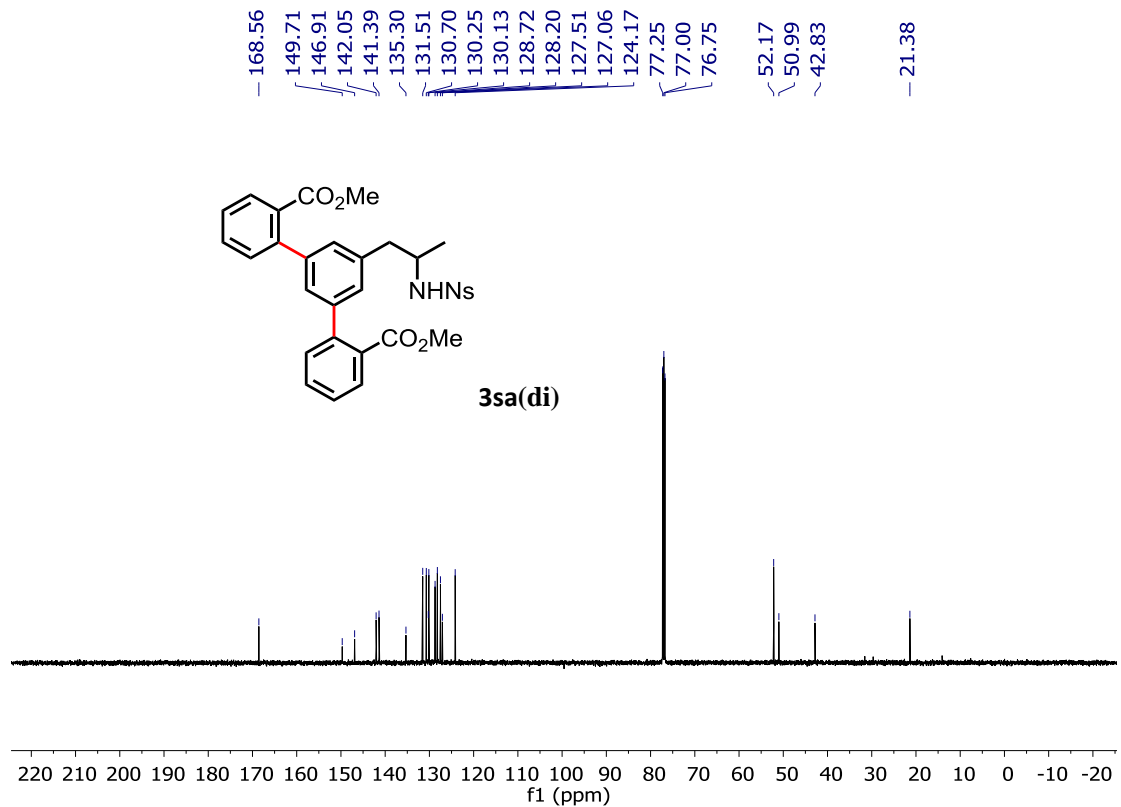



C:/Users/nmruser/Desktop/d2-134-4/1/fid

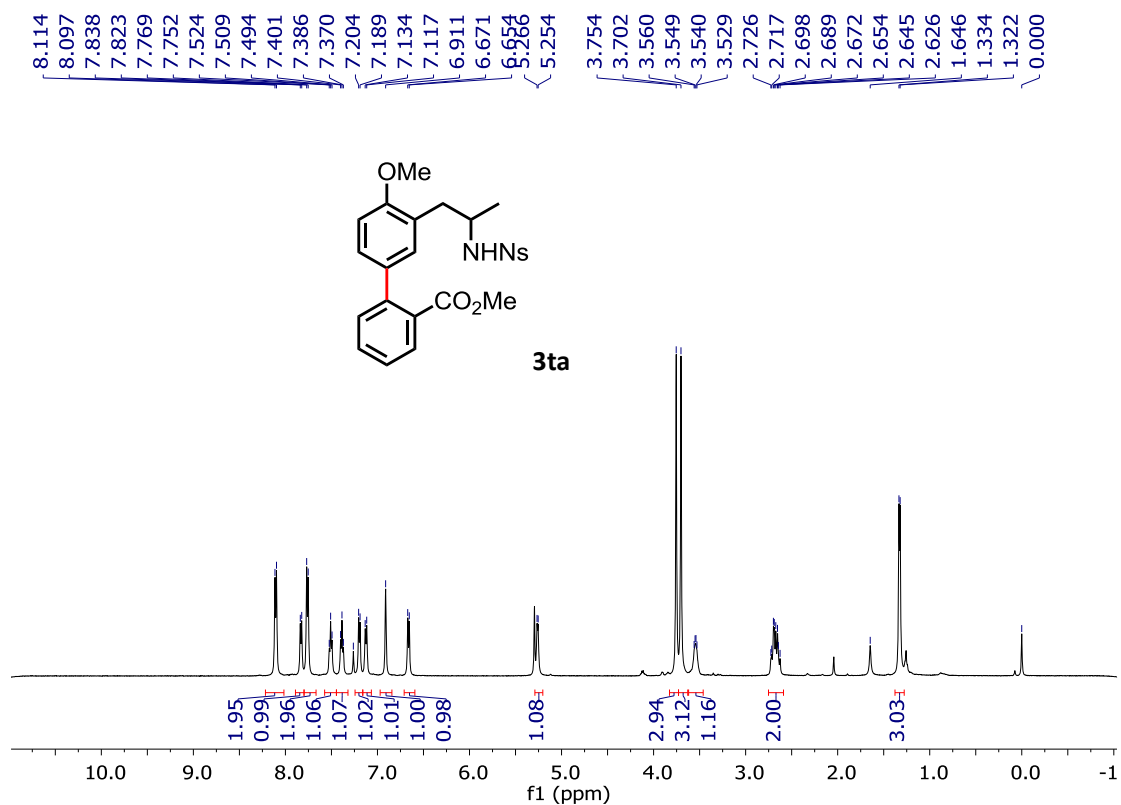

C:/Users/nmruser/Desktop/d2-134-4/2/fid

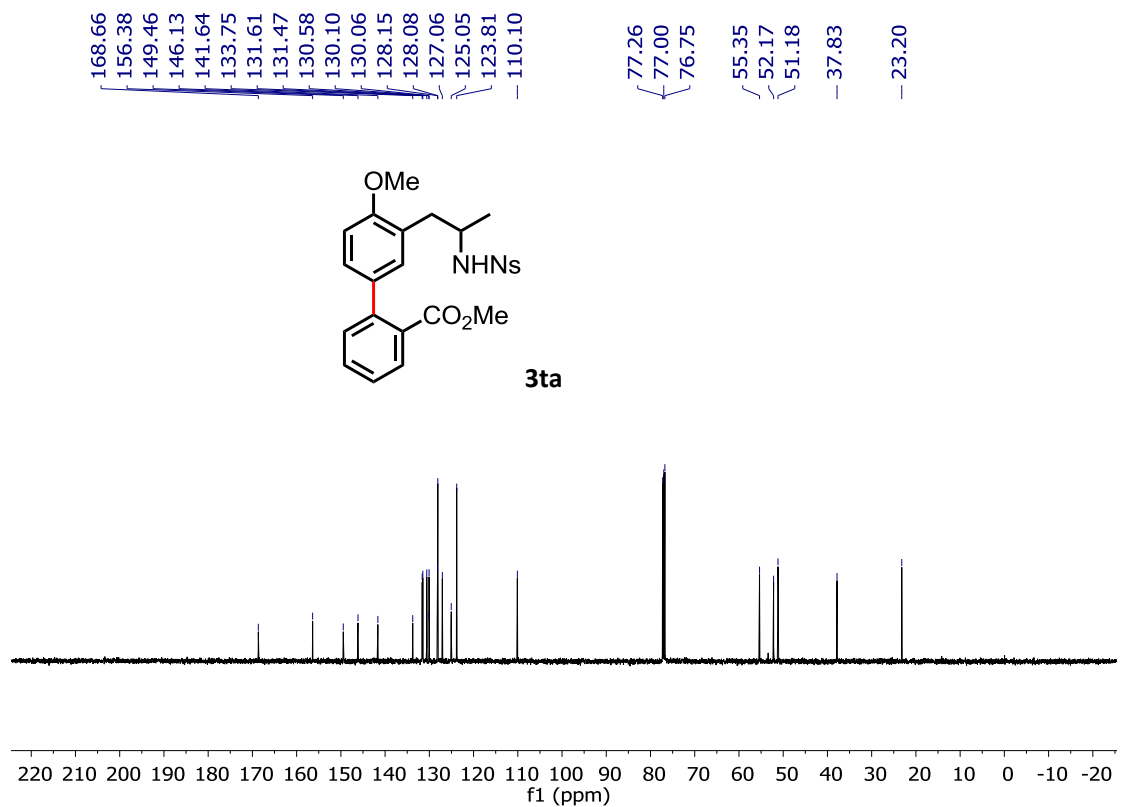

d2-116-2.5.fid

H-1 Routine, DRX-500, BBO Probe

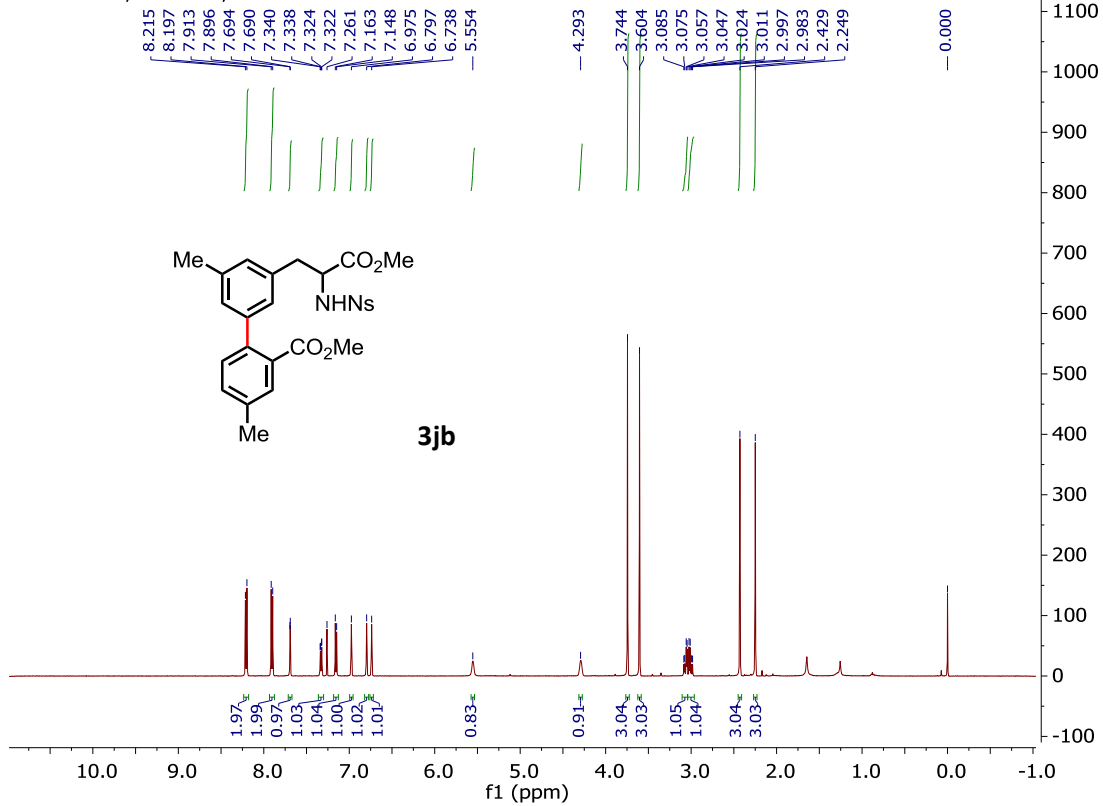

d2-116-2.6.fid

C-13 Routine, BBO Probe, DRX-500

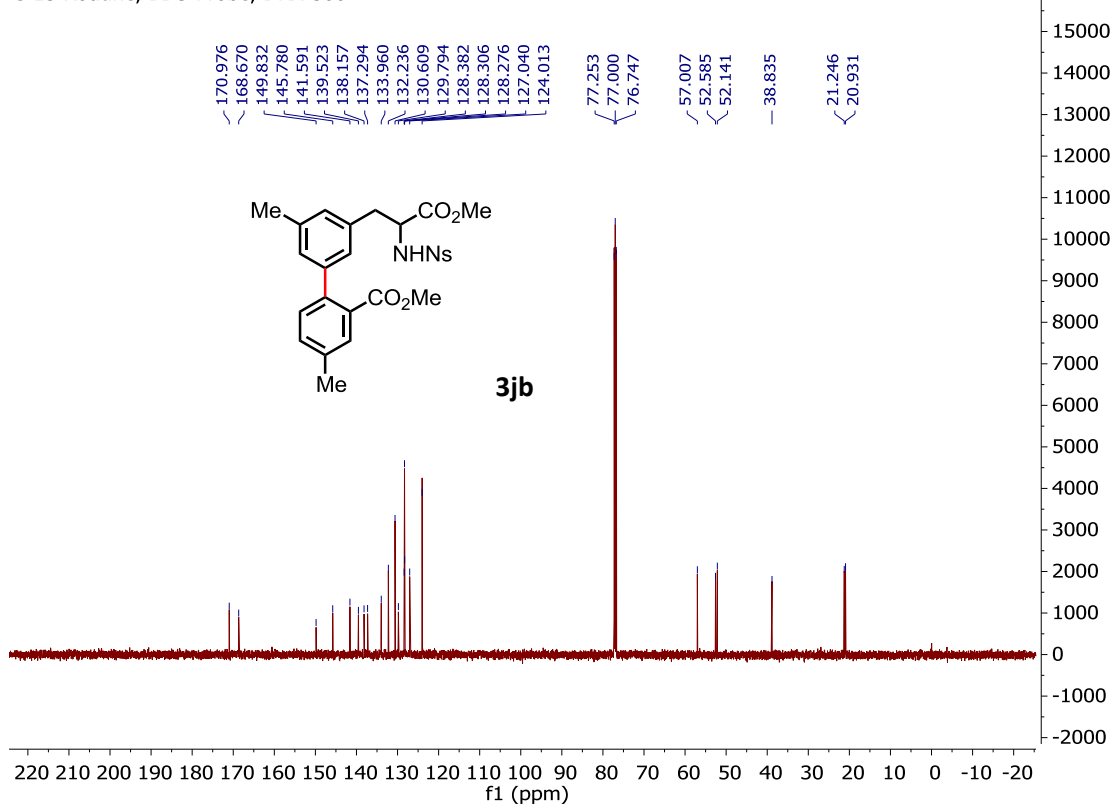

C:/Users/nmruser/Desktop/d2-116-4/1/fid

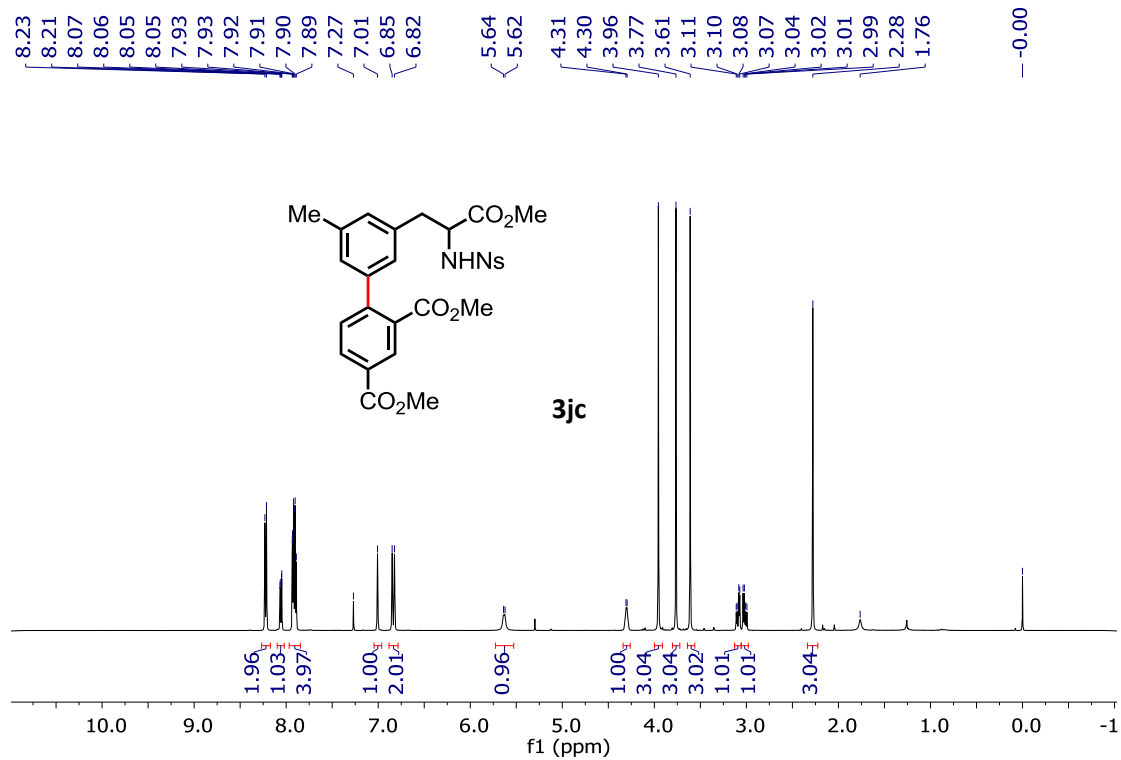

C:/Users/nmruser/Desktop/d2-116-4/2/fid

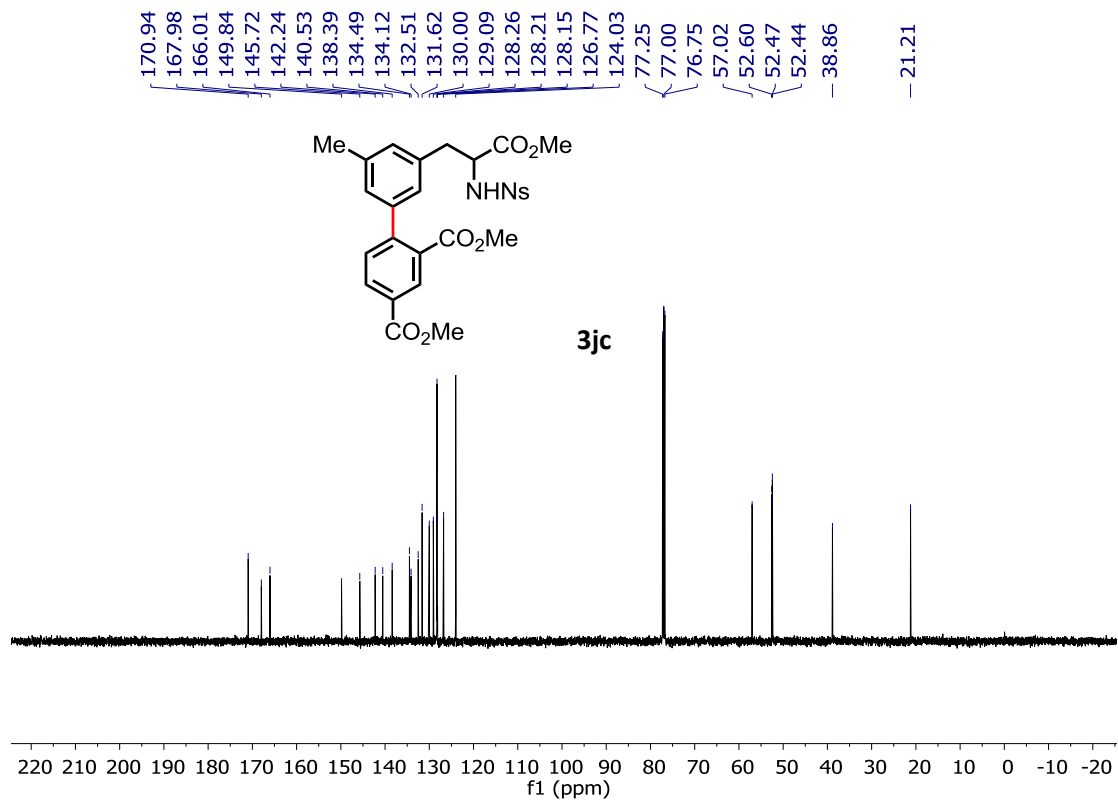

C:/Users/nmruser/Desktop/d2-105-11/1/fid

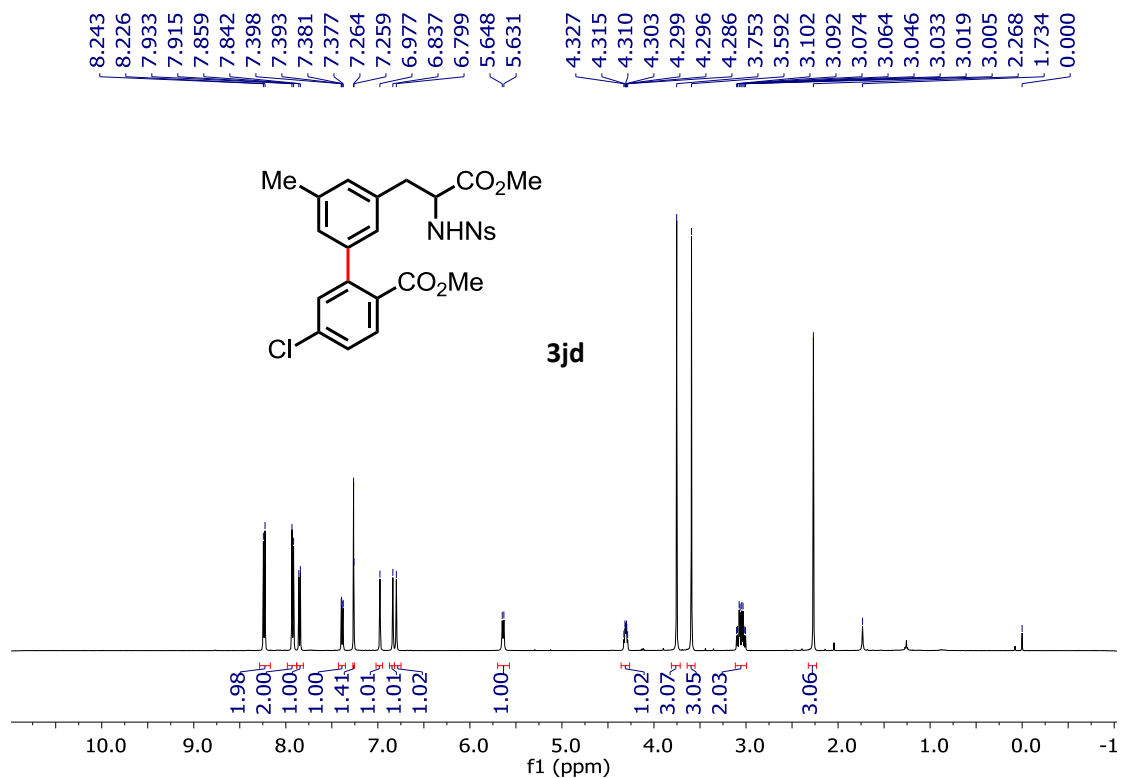

C:/Users/nmruser/Desktop/d2-105-11/2/fid

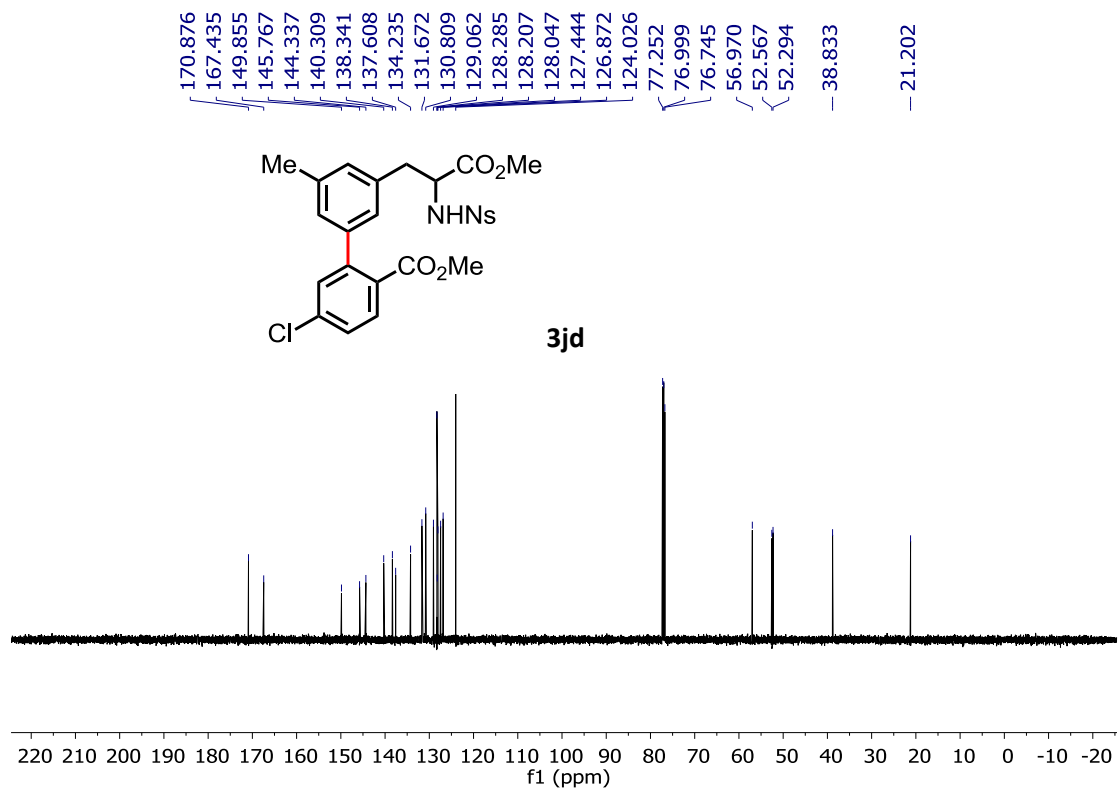

C:/Users/nmruser/Desktop/d2-105-7/1/fid

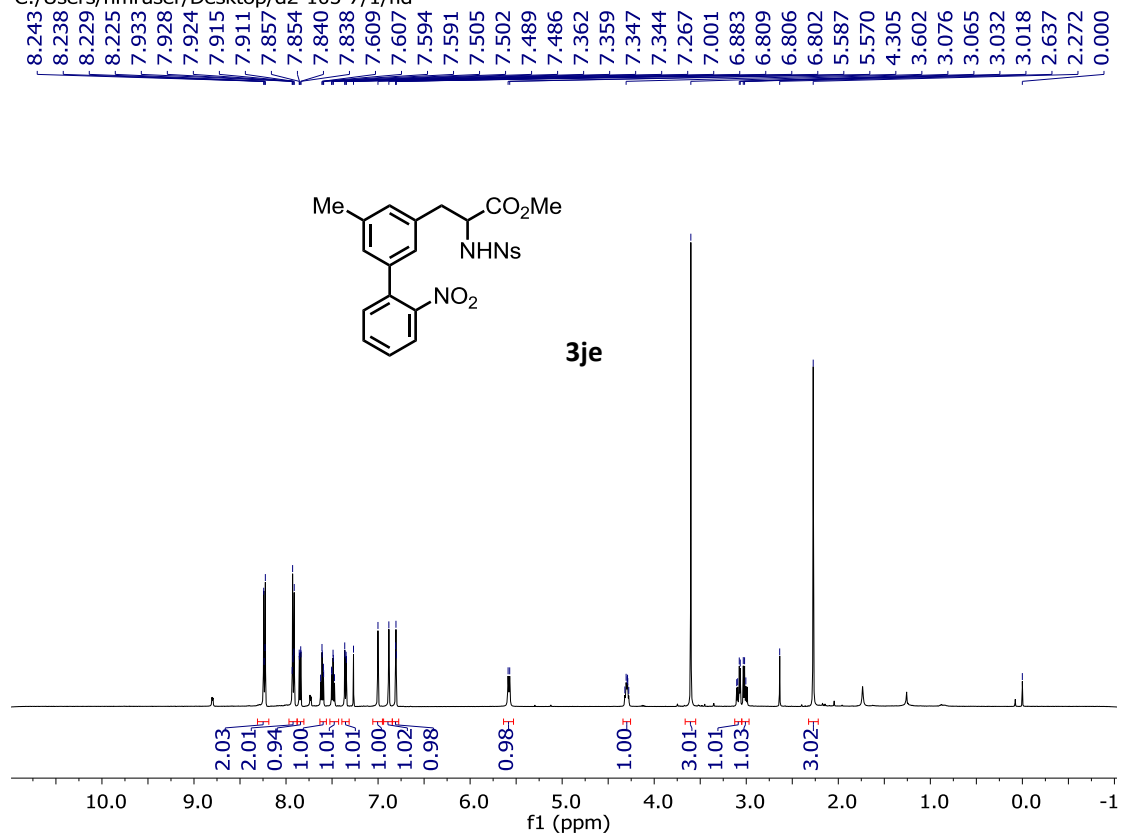

C:/Users/nmruser/Desktop/d2-105-7/2/fid

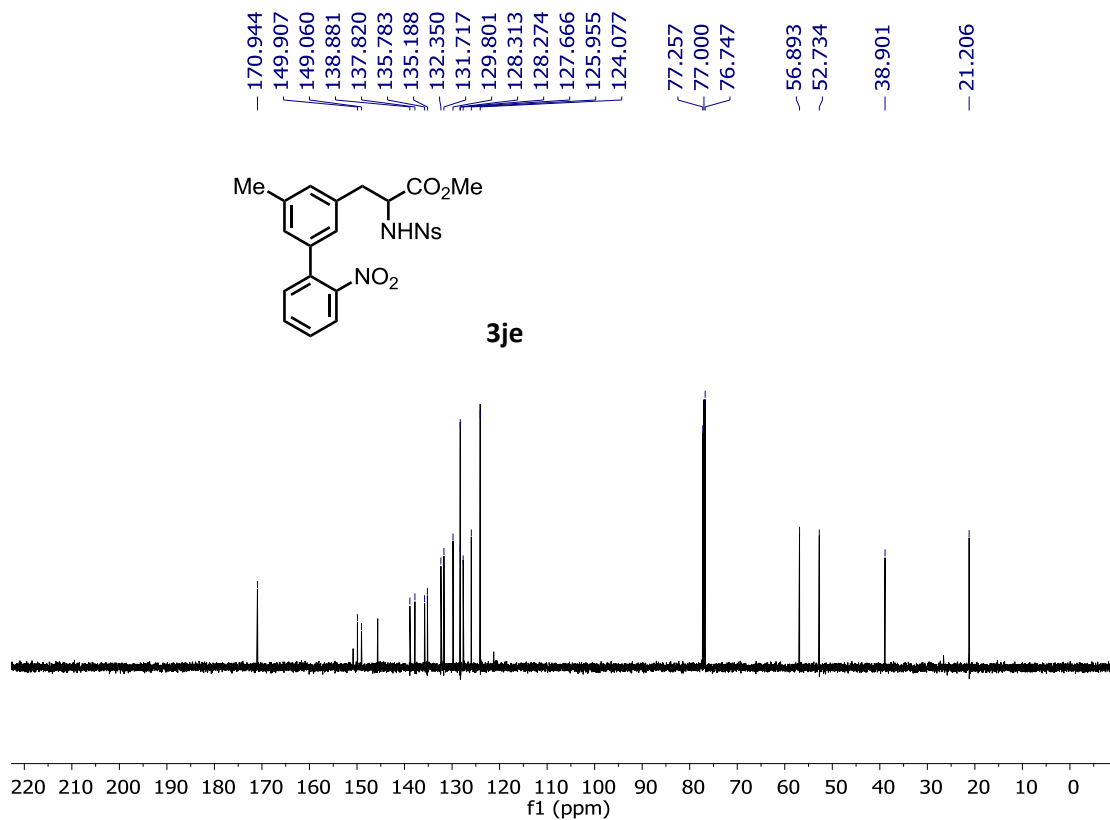

C:/Users/nmruser/Desktop/d2-105-4/1/fid

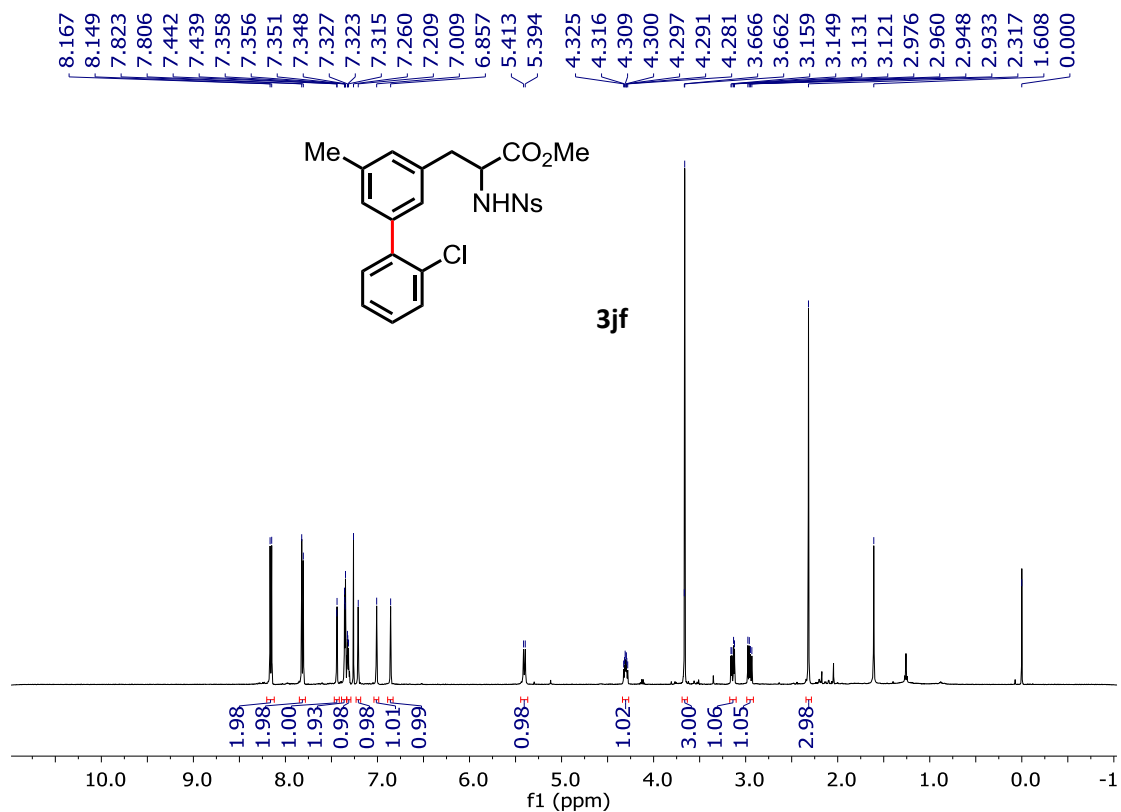

C:/Users/nmruser/Desktop/d2-105-4/2/fid

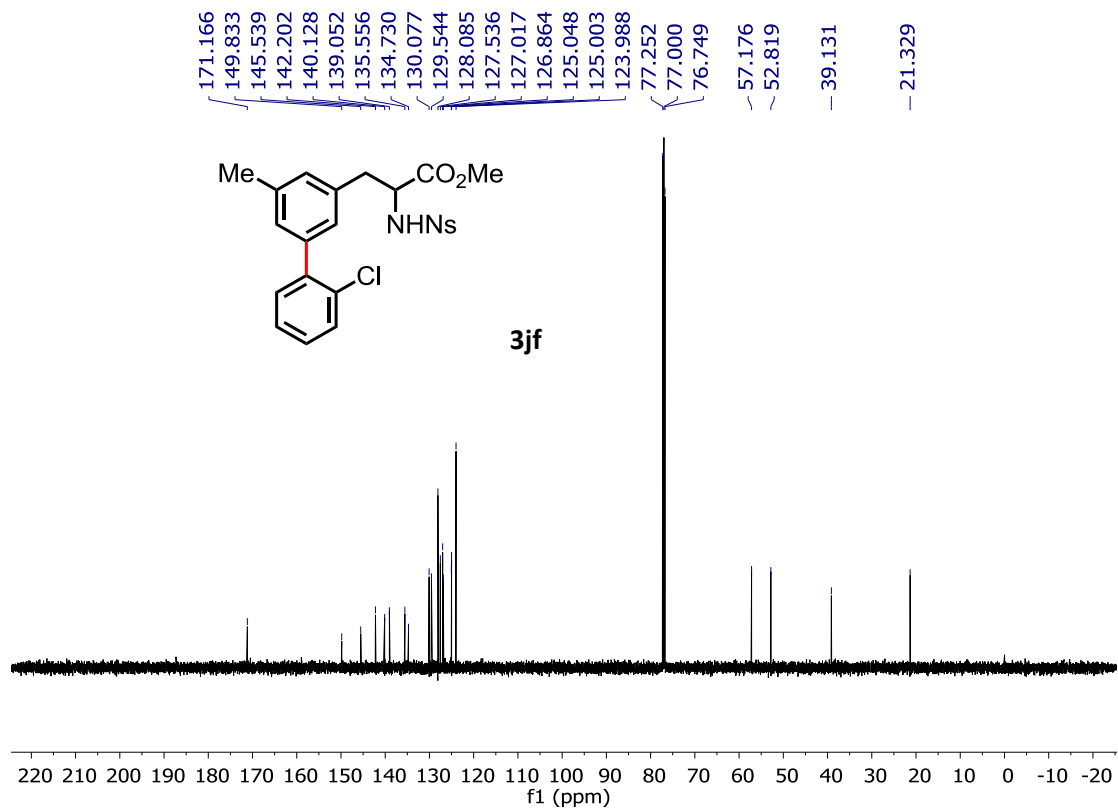

C:/Users/nmruser/Desktop/d2-105-6/7/fid

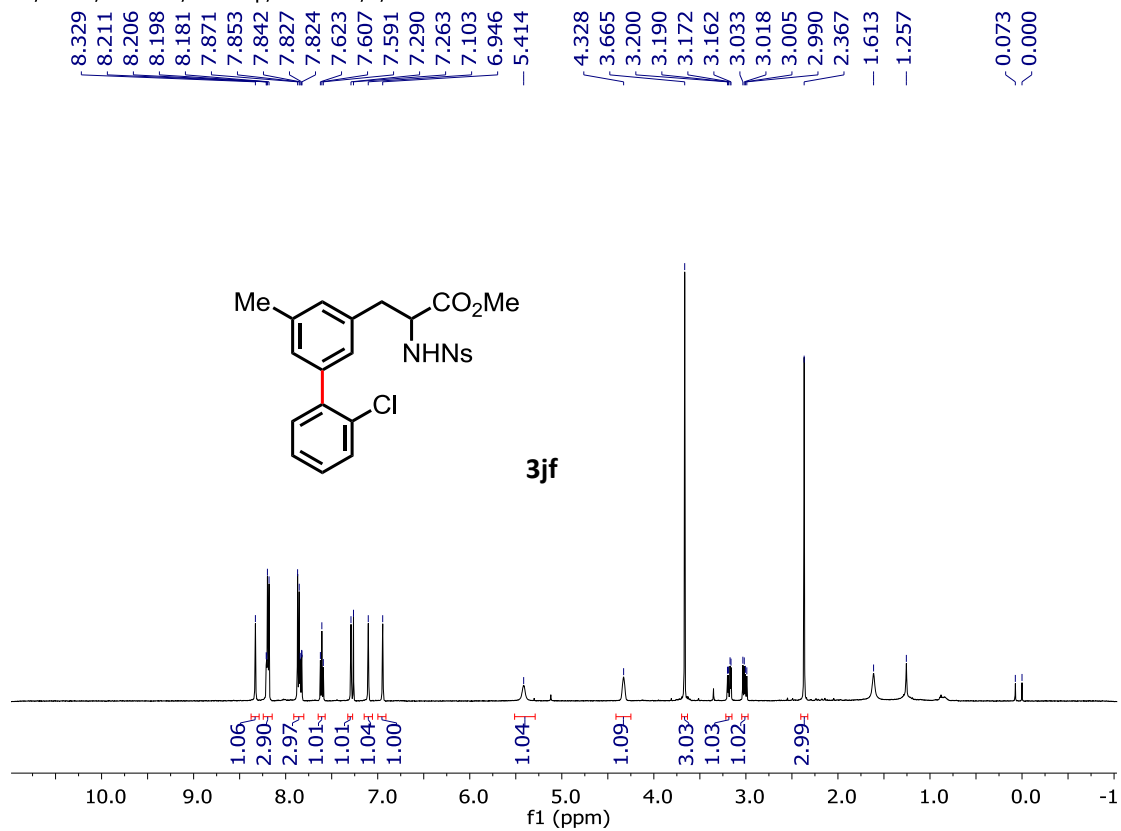

C:/Users/nmruser/Desktop/d2-105-6/8/fid

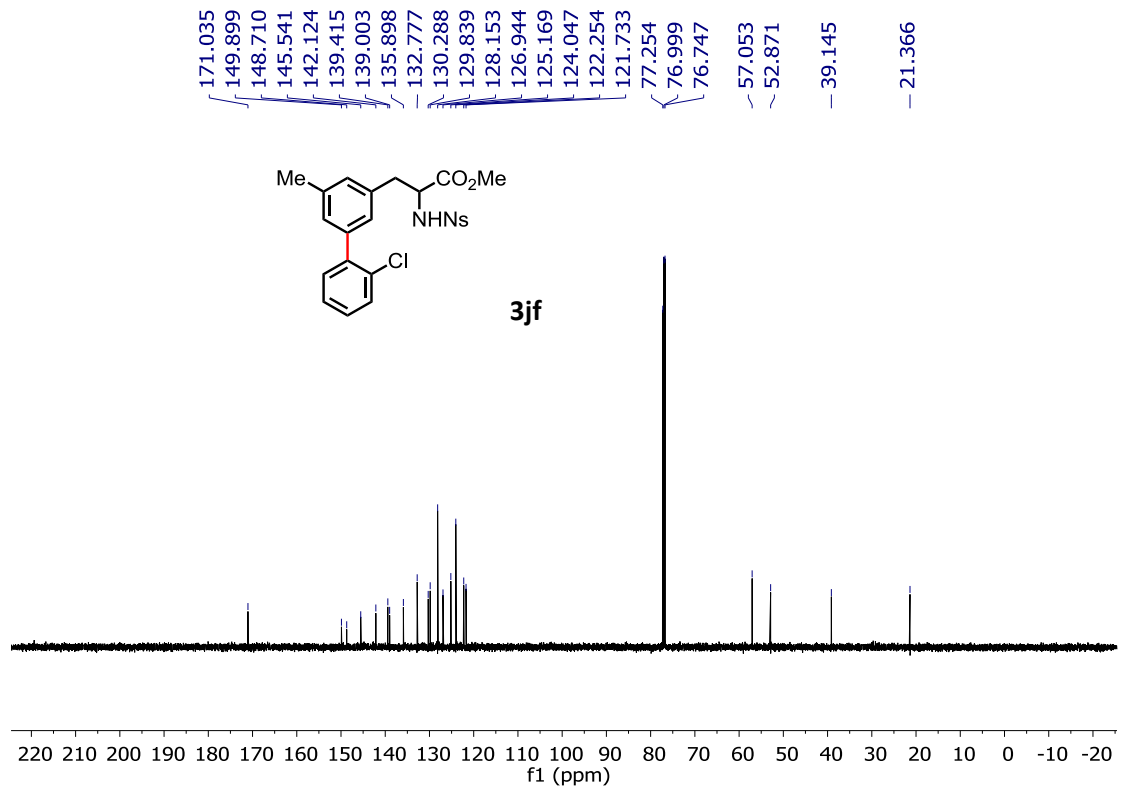

C:/Users/nmruser/Desktop/d2-104-7/1/fid

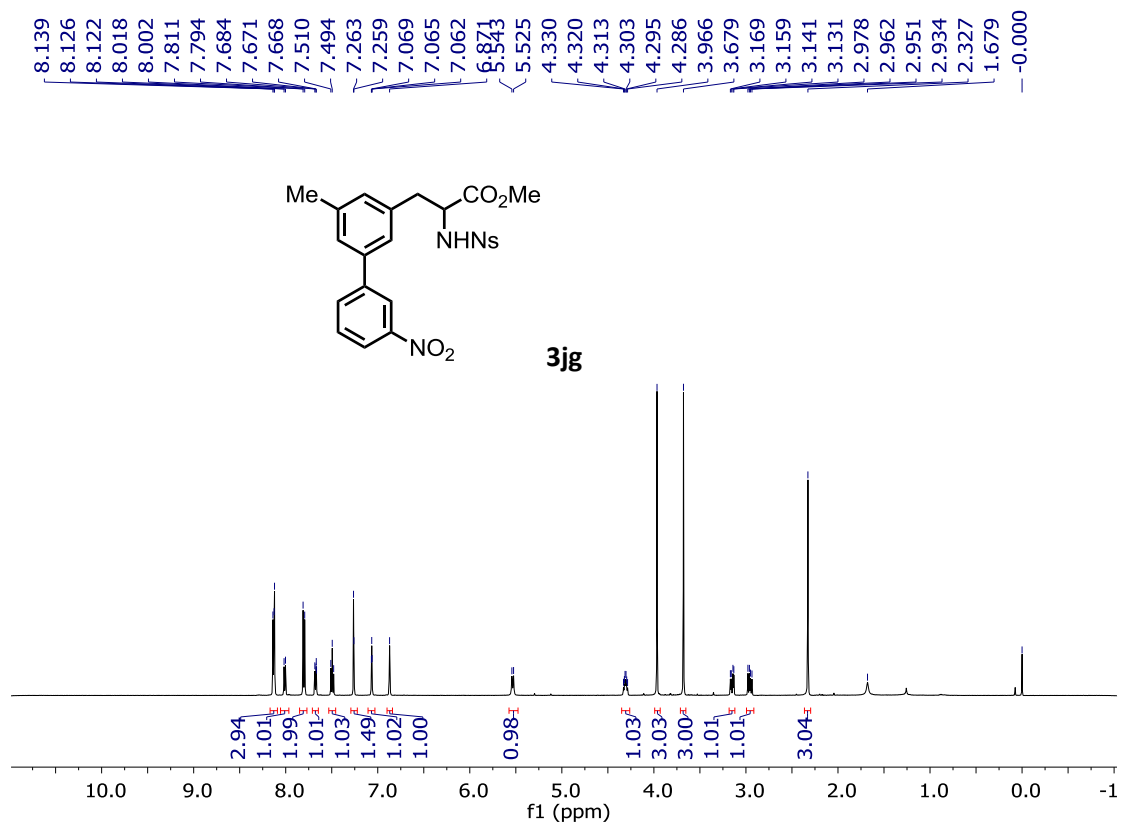

C:/Users/nmruser/Desktop/d2-104-7/2/fid

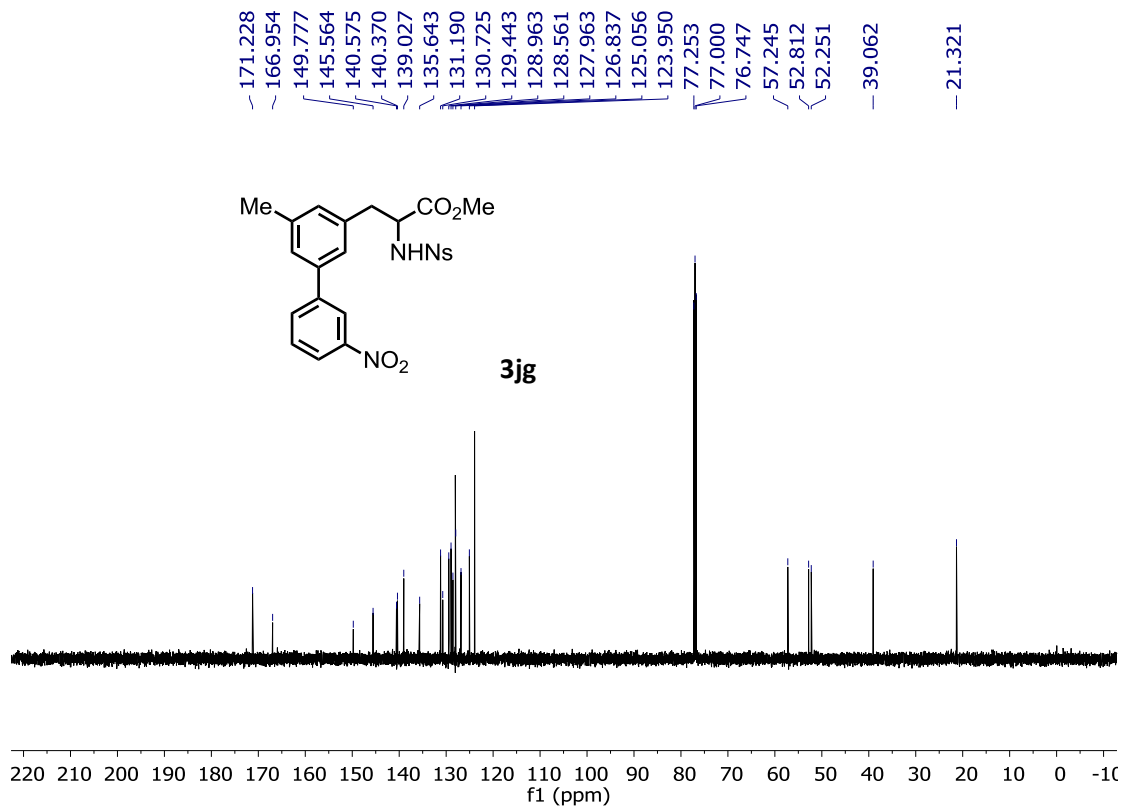



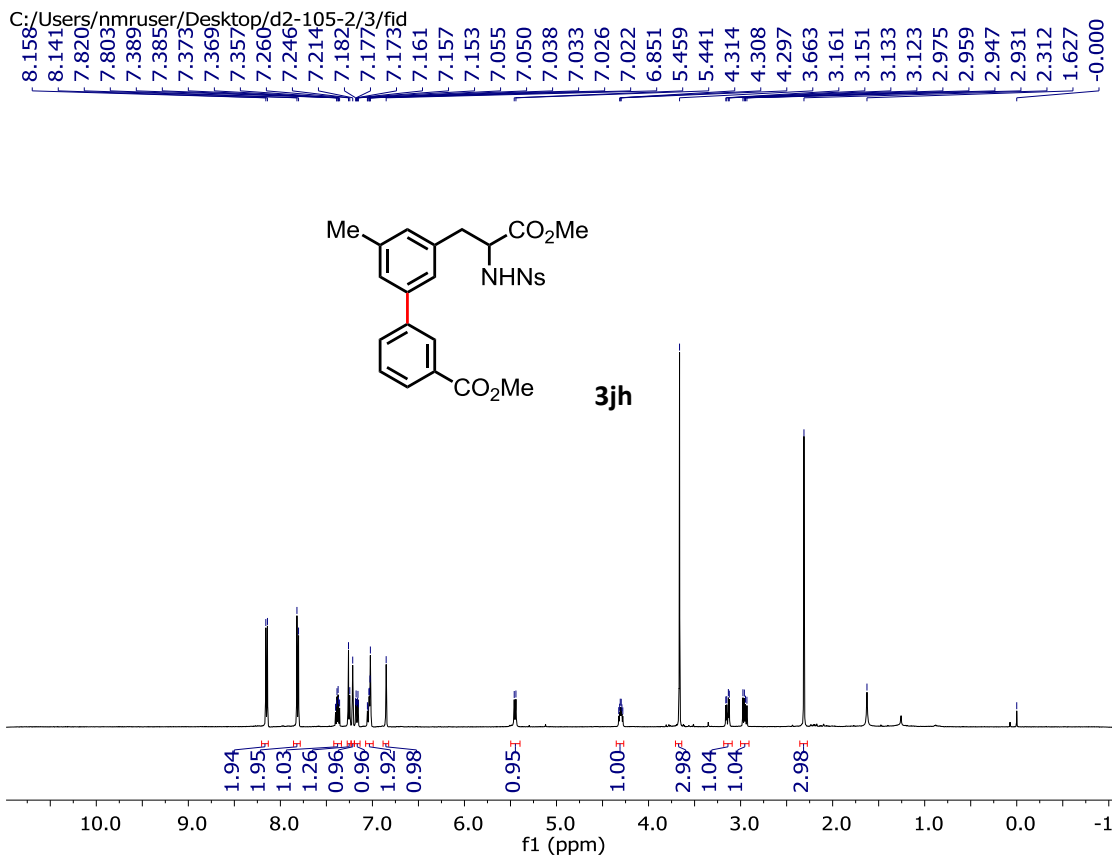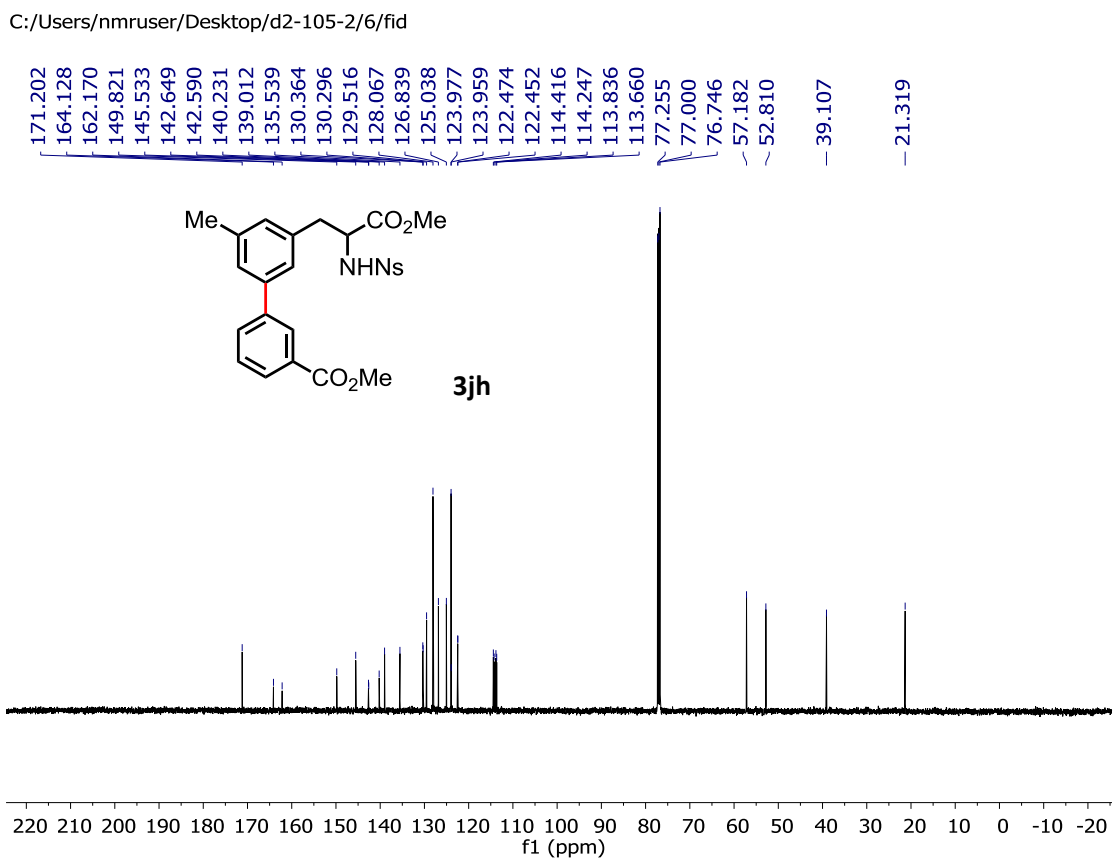

C:/Users/nmruser/Desktop/d2-104-4-2/2/fid

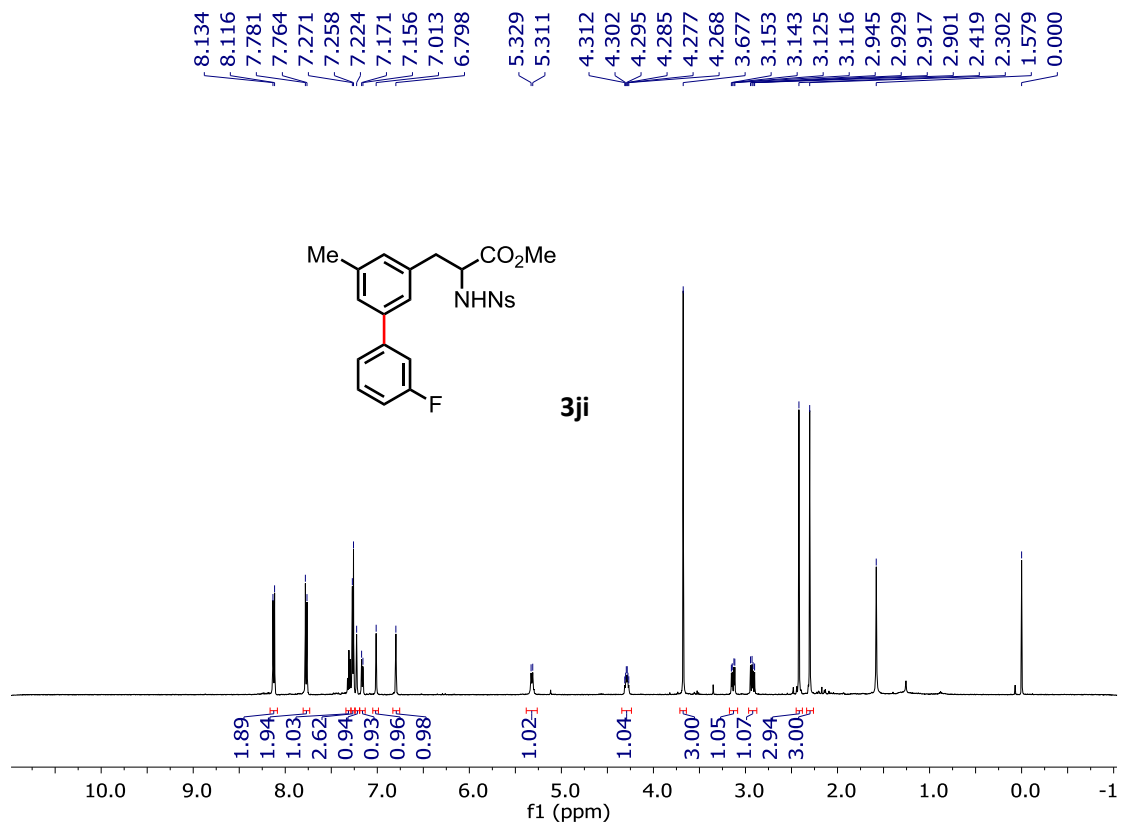

d2-104-4-2.3.fid

C-13 Routine, BBO Probe DRX-500

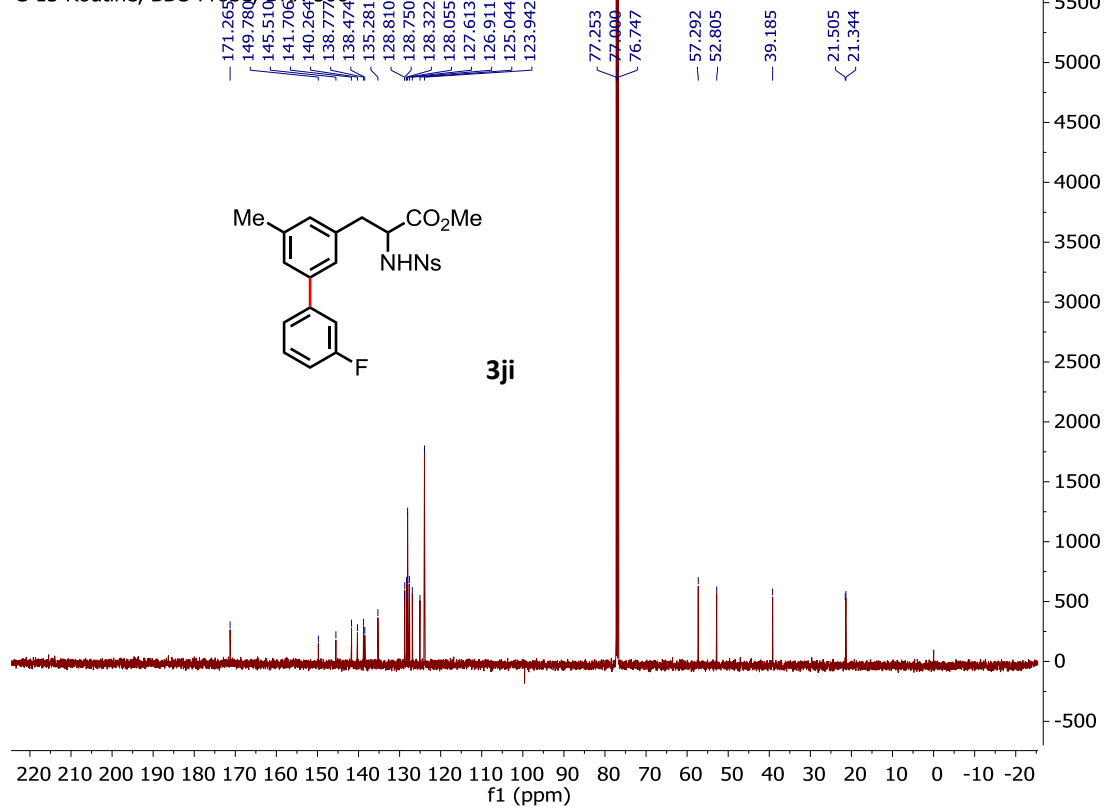

C:/Users/nmruser/Desktop/d2-104-9/1/fid

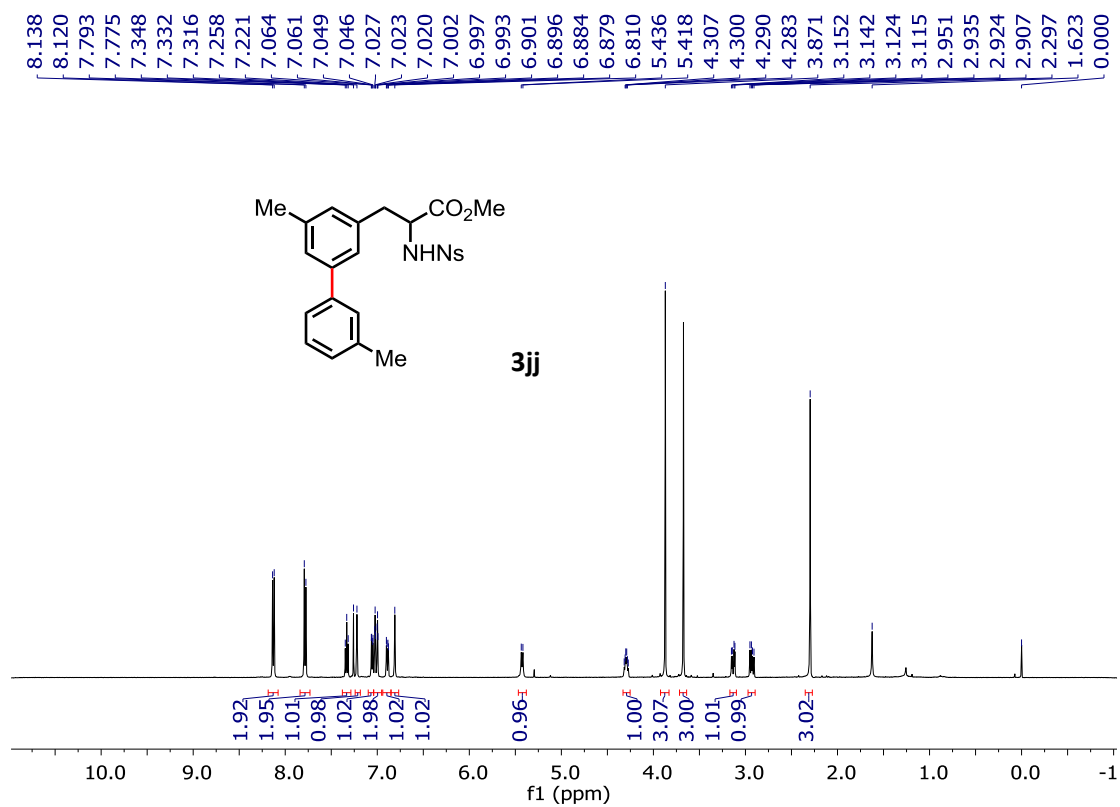

C:/Users/nmruser/Desktop/d2-104-9/2/fid

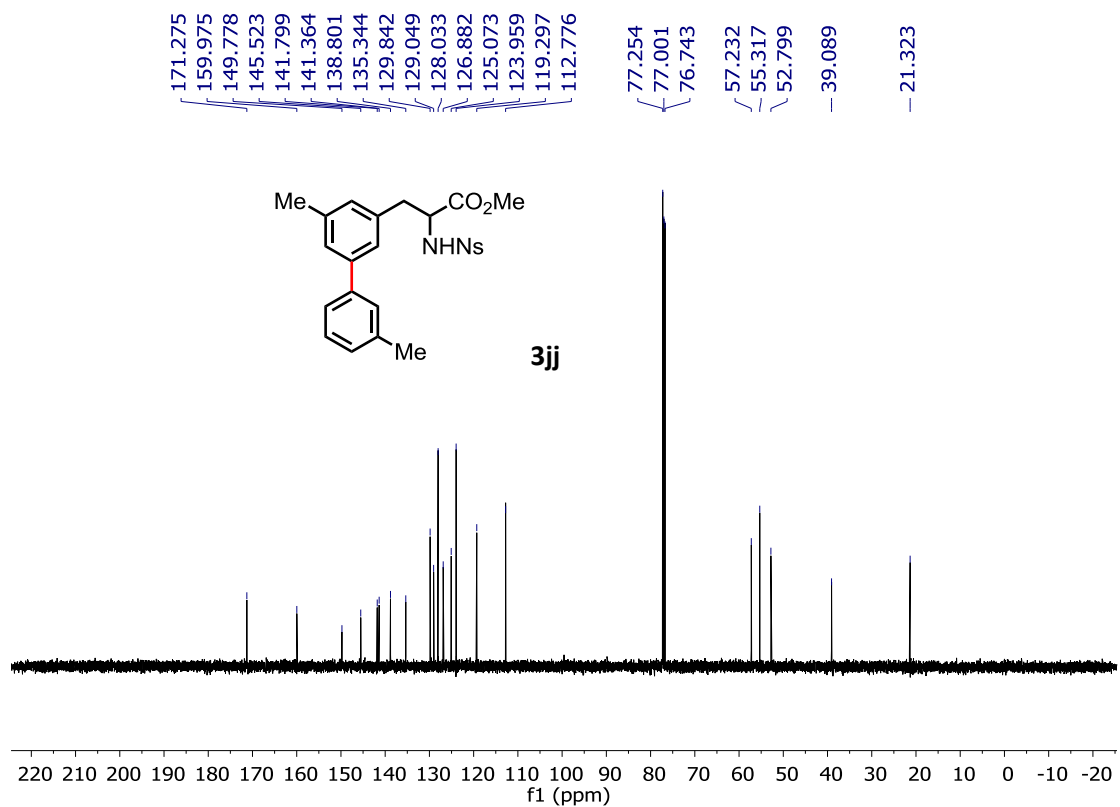

C:/Users/nmruser/Desktop/d2-104-5 redo/1/fid

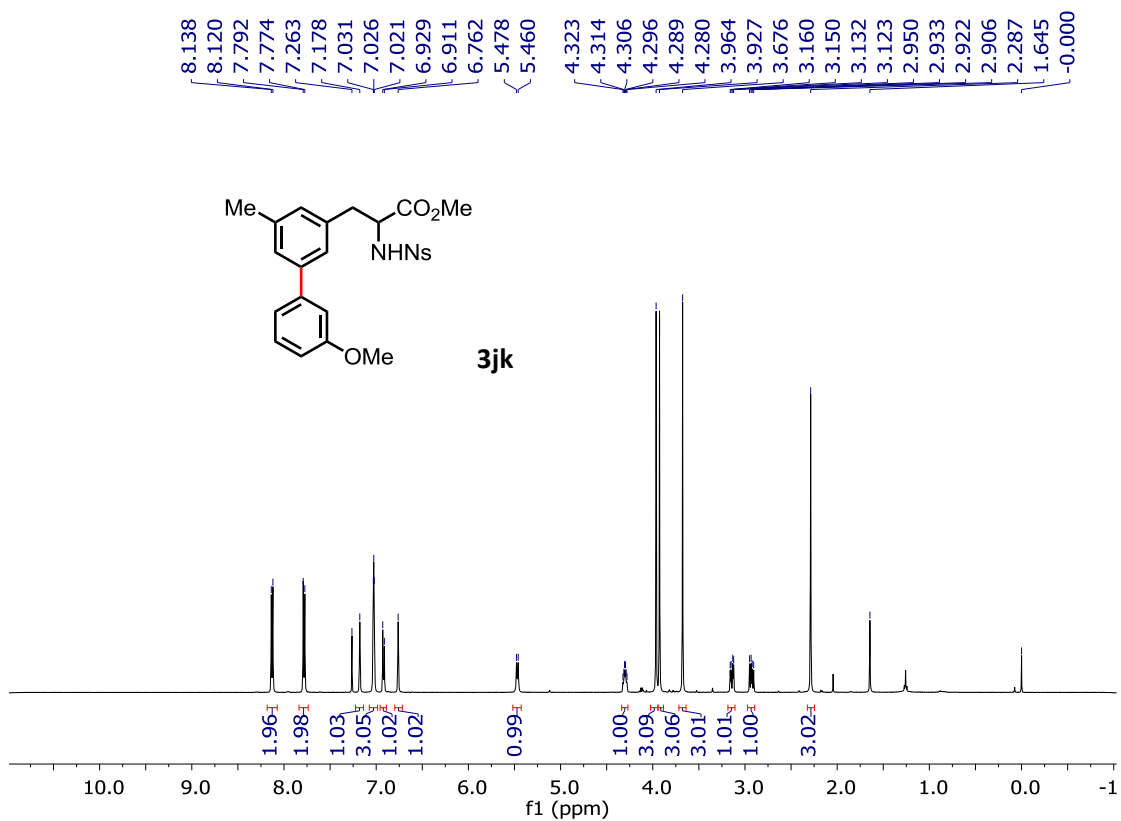

C:/Users/nmruser/Desktop/d2-104-5 redo/2/fid

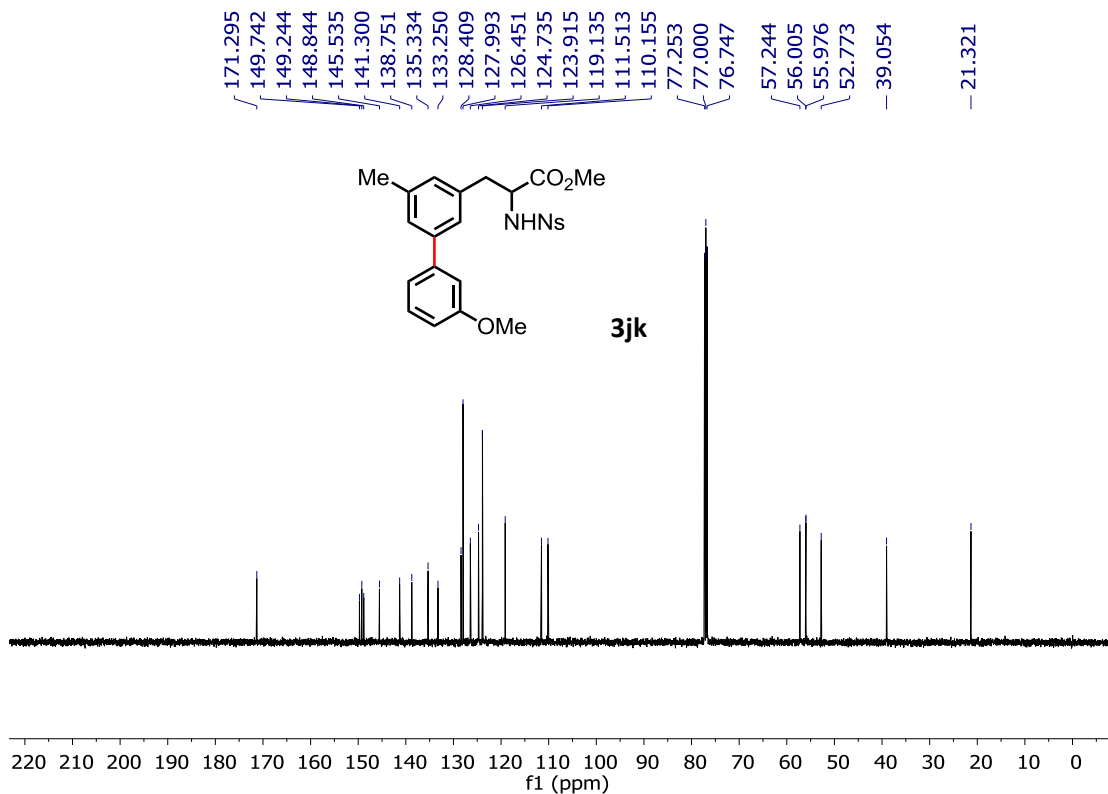

C:/Users/nmruser/Desktop/d2-104-8/1/fid

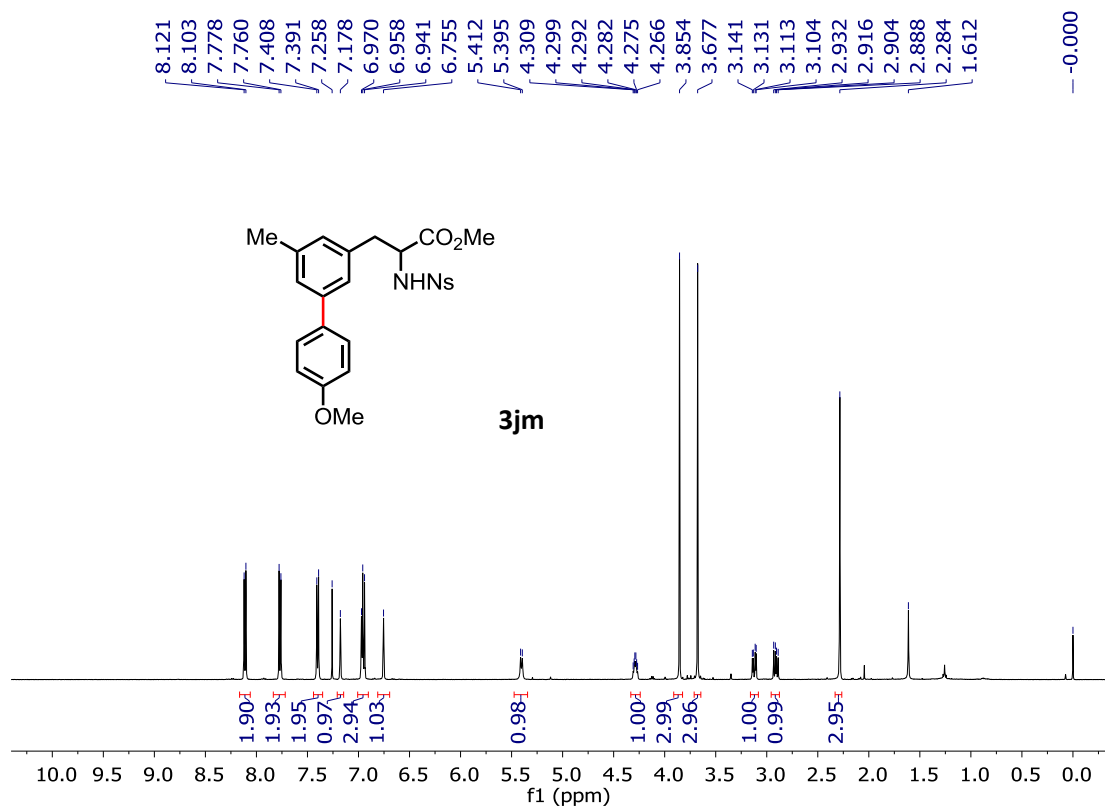

C:/Users/nmruser/Desktop/d2-104-8/2/fid

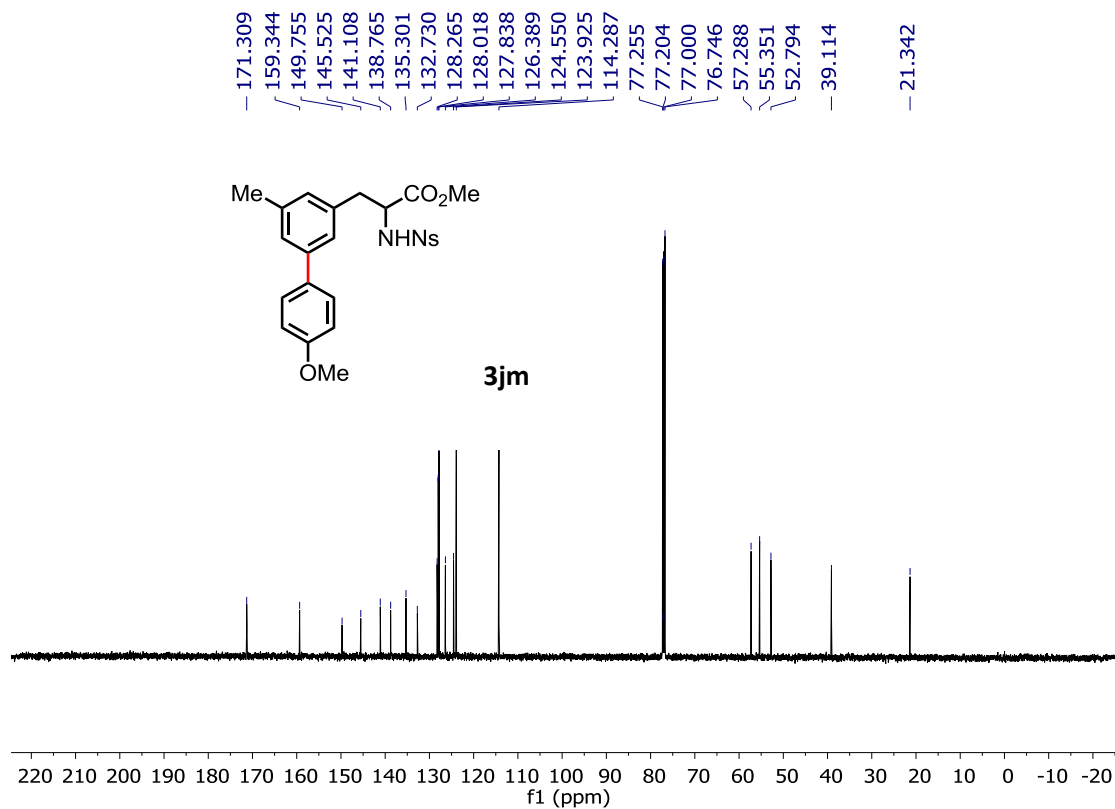

d2-93-4\_01  
Std proton

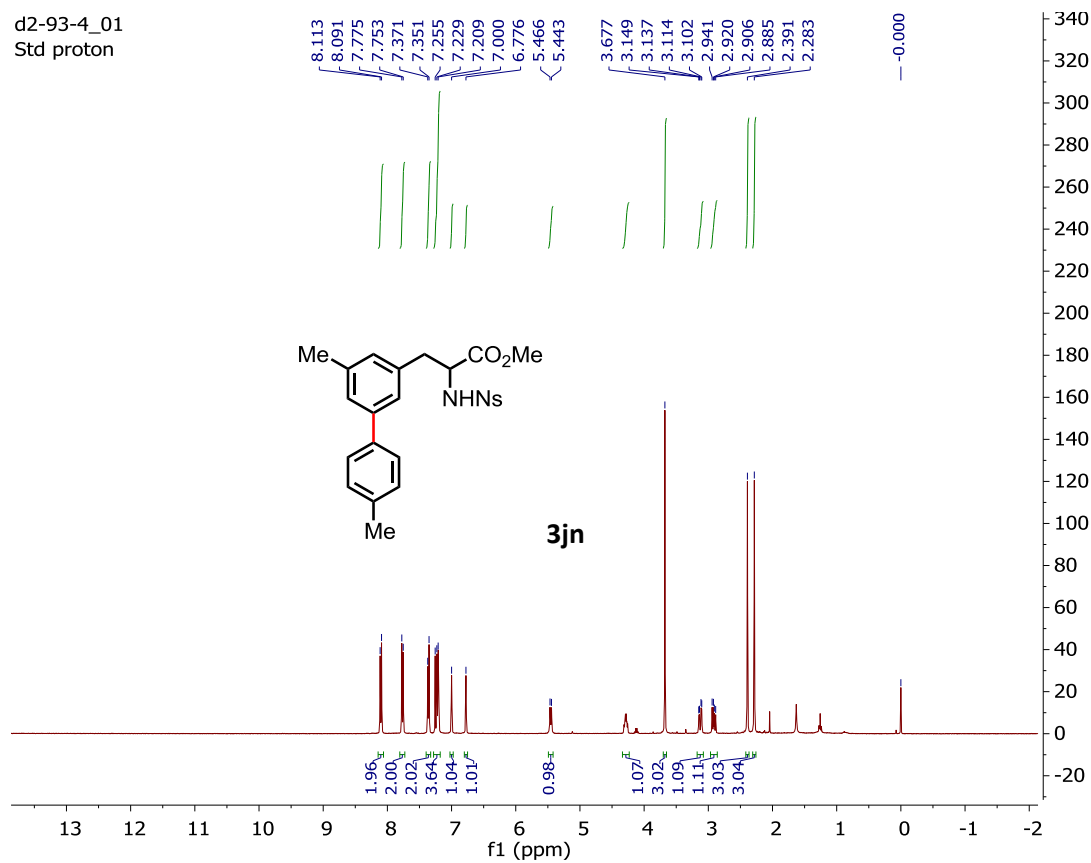

d2-93-4C\_01  
Std proton

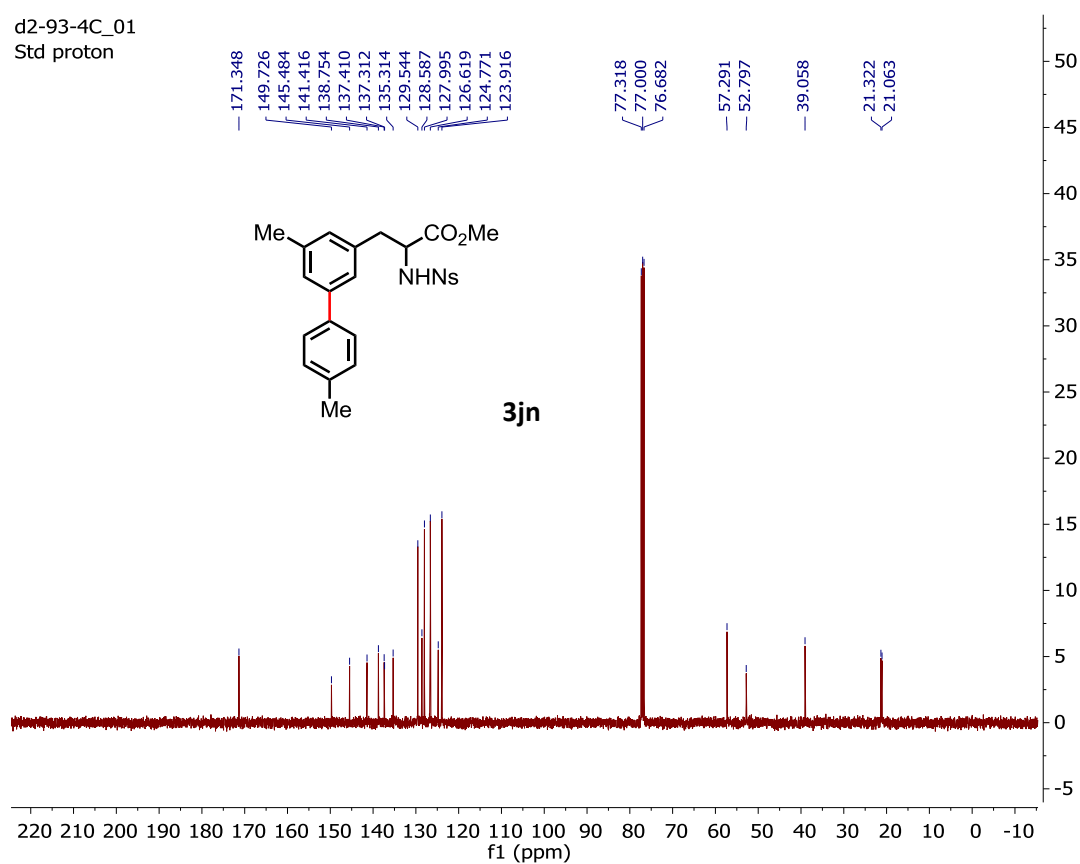

C:/Users/nmruser/Desktop/d2-105-1/1/fid

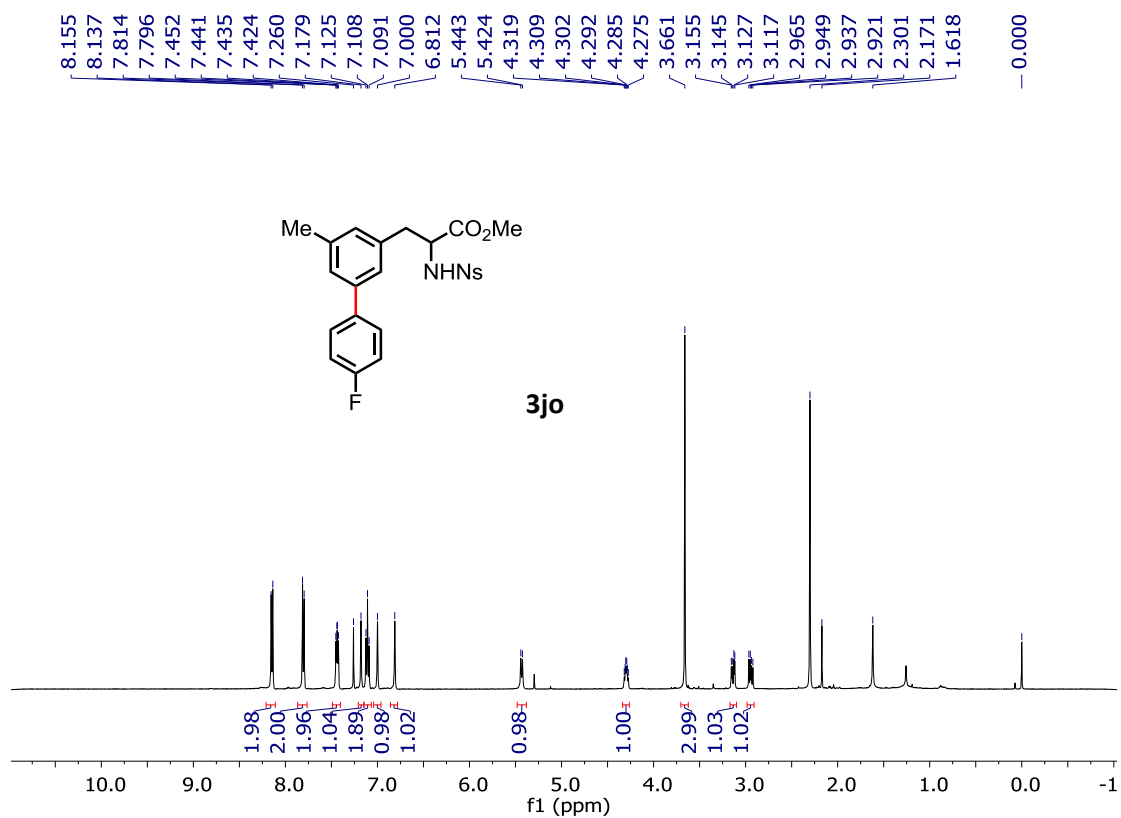

C:/Users/nmruser/Desktop/d2-105-1/2/fid

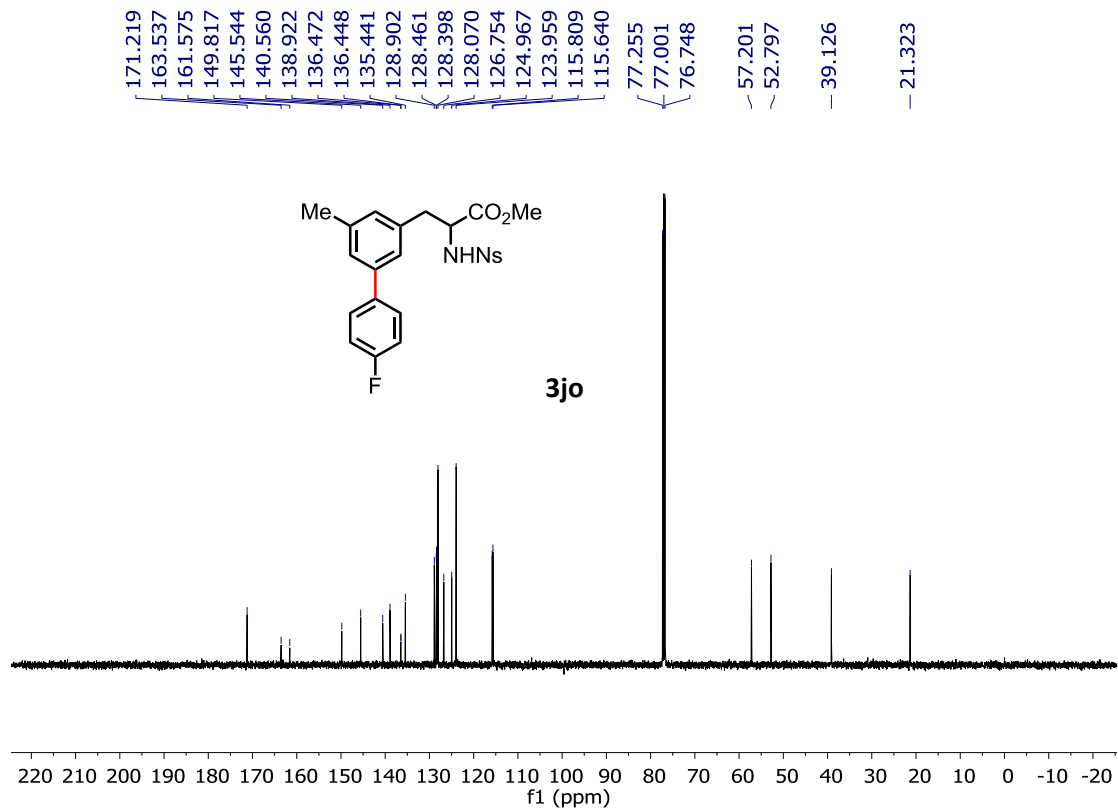

C:/Users/nmruser/Desktop/d2-105-8/2/fid

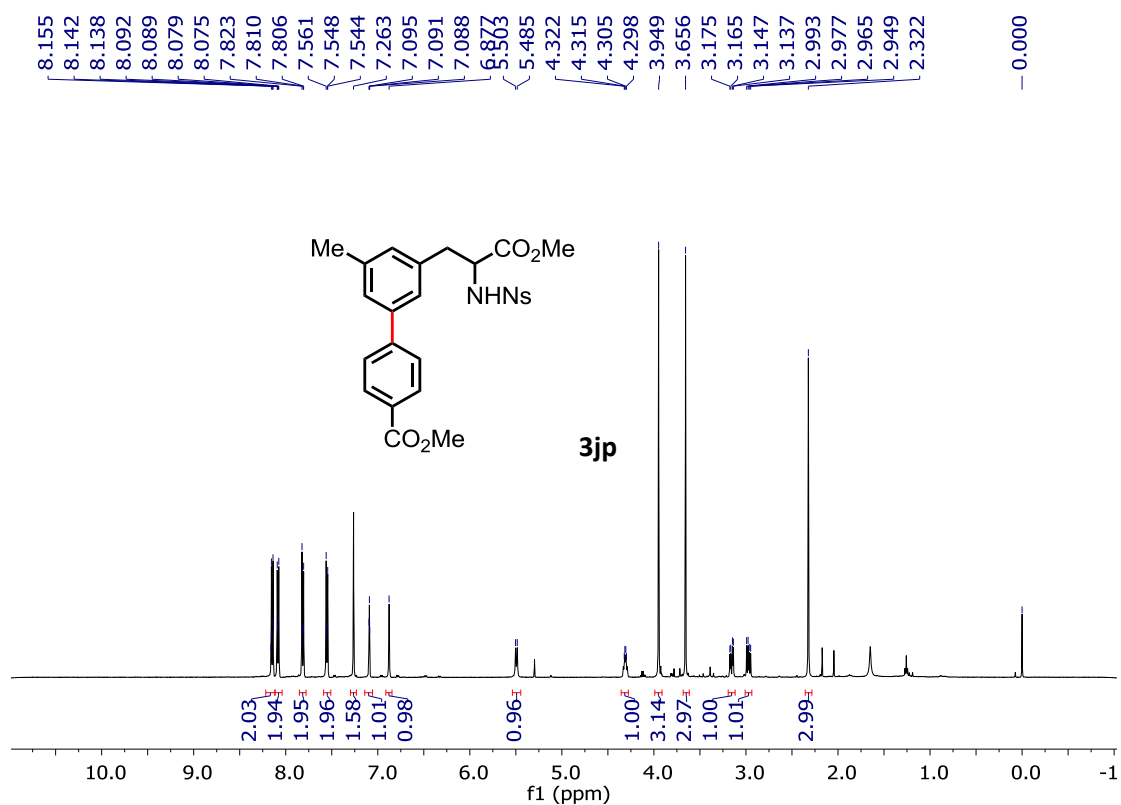

C:/Users/nmruser/Desktop/d2-105-8/1/fid

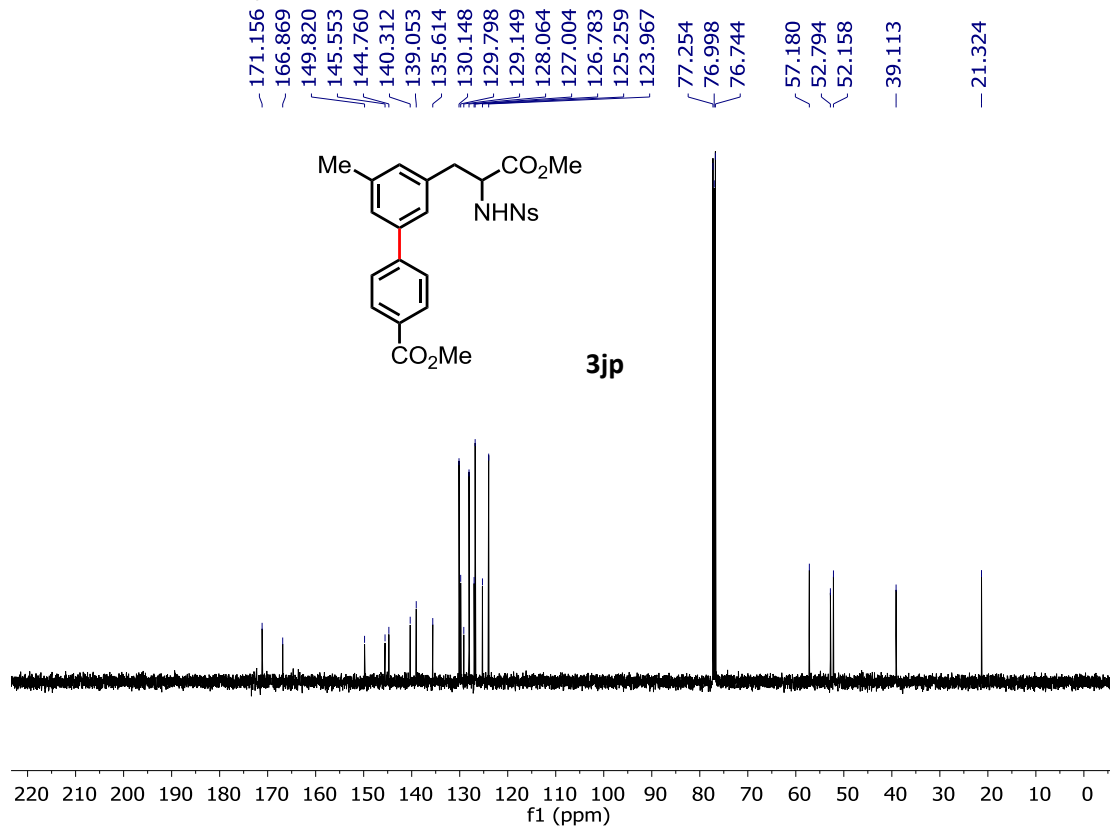



C:/Users/nmruser/Desktop/d2-104-6/1/fid

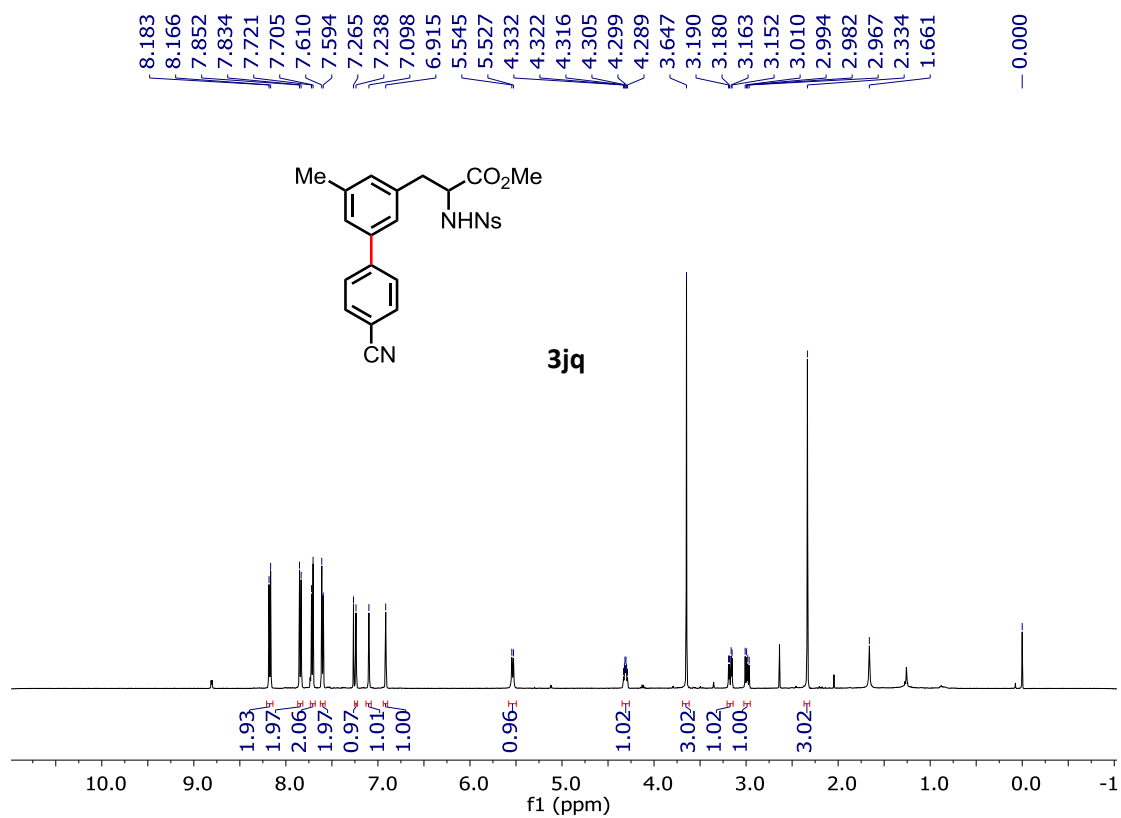

C:/Users/nmruser/Desktop/d2-104-6/2/fid

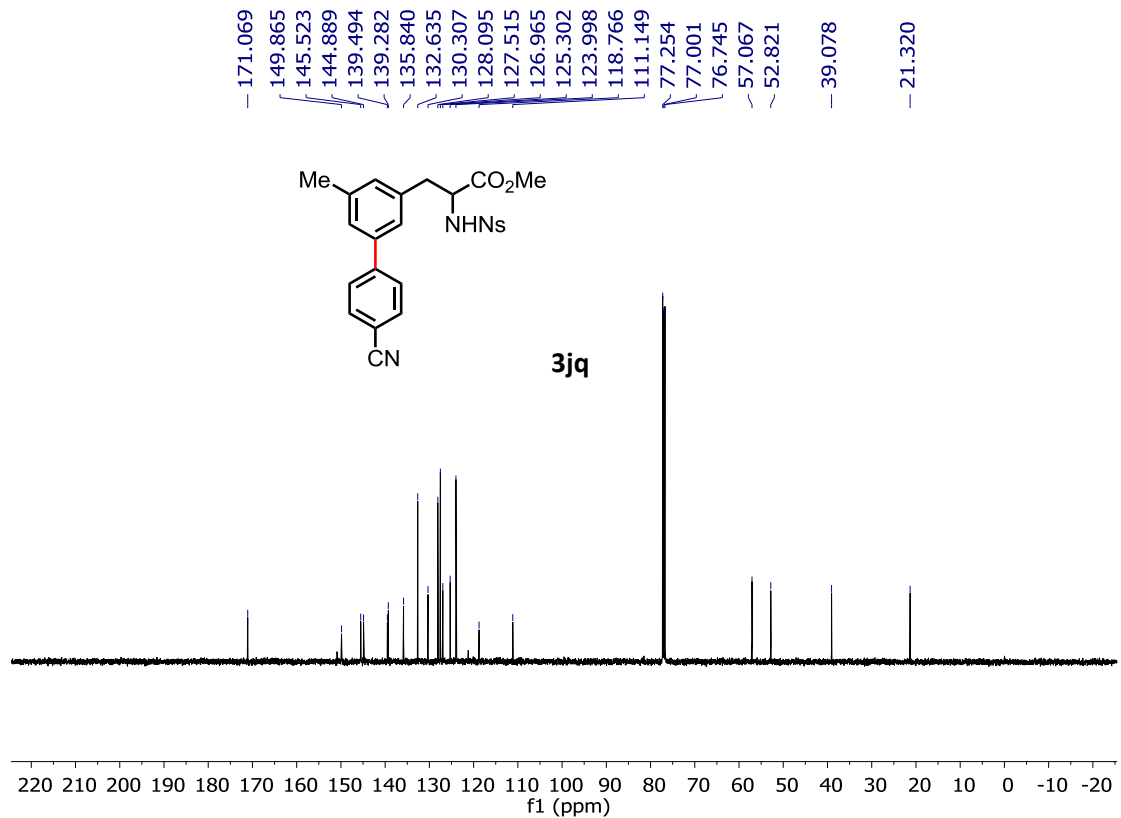

3jr.1.fid

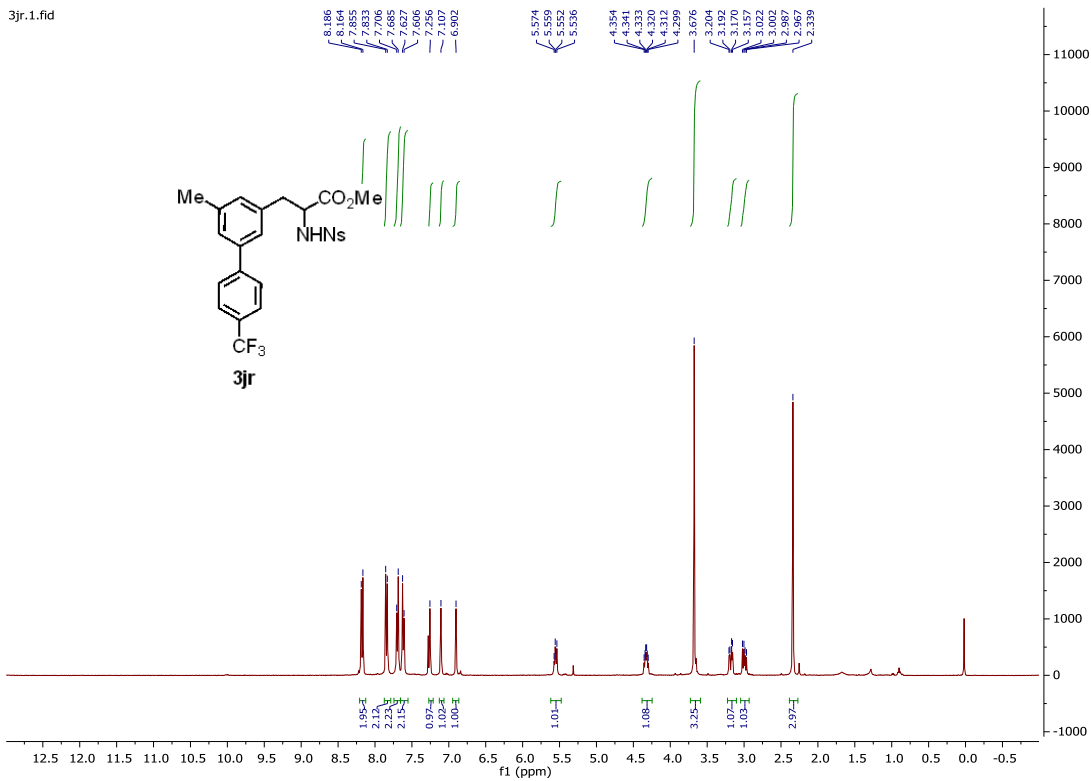

1201-dqp-1.2.fid

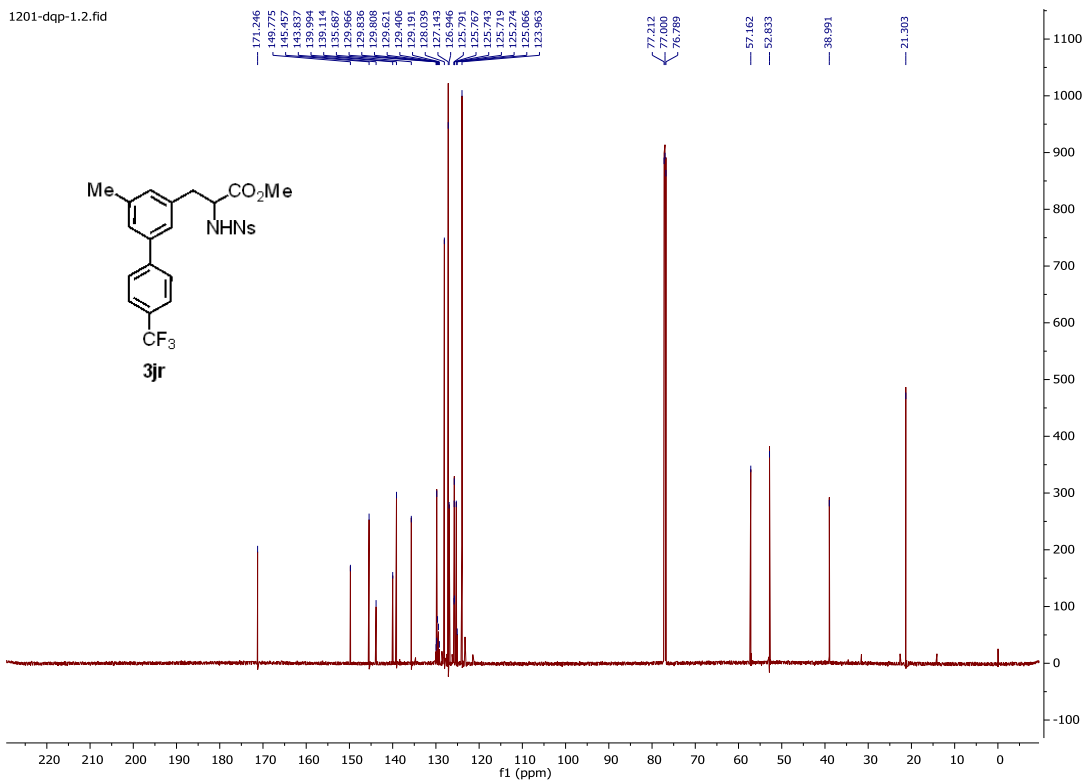

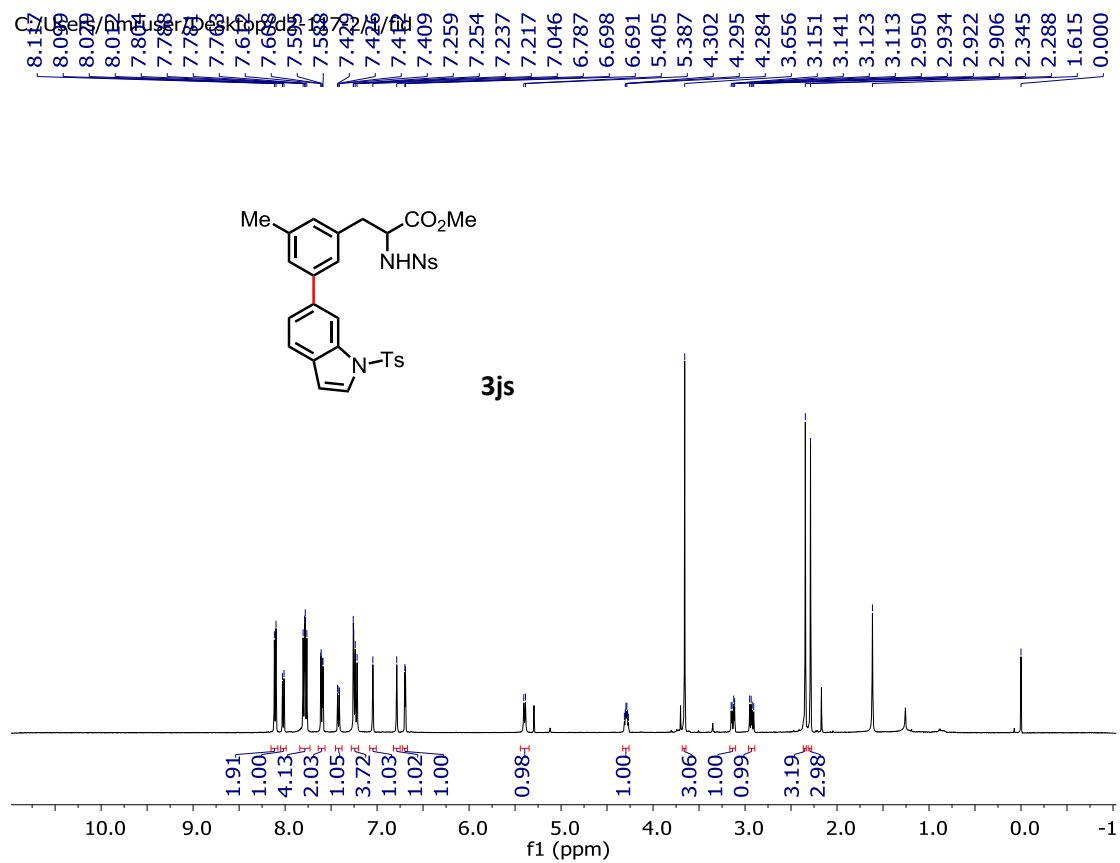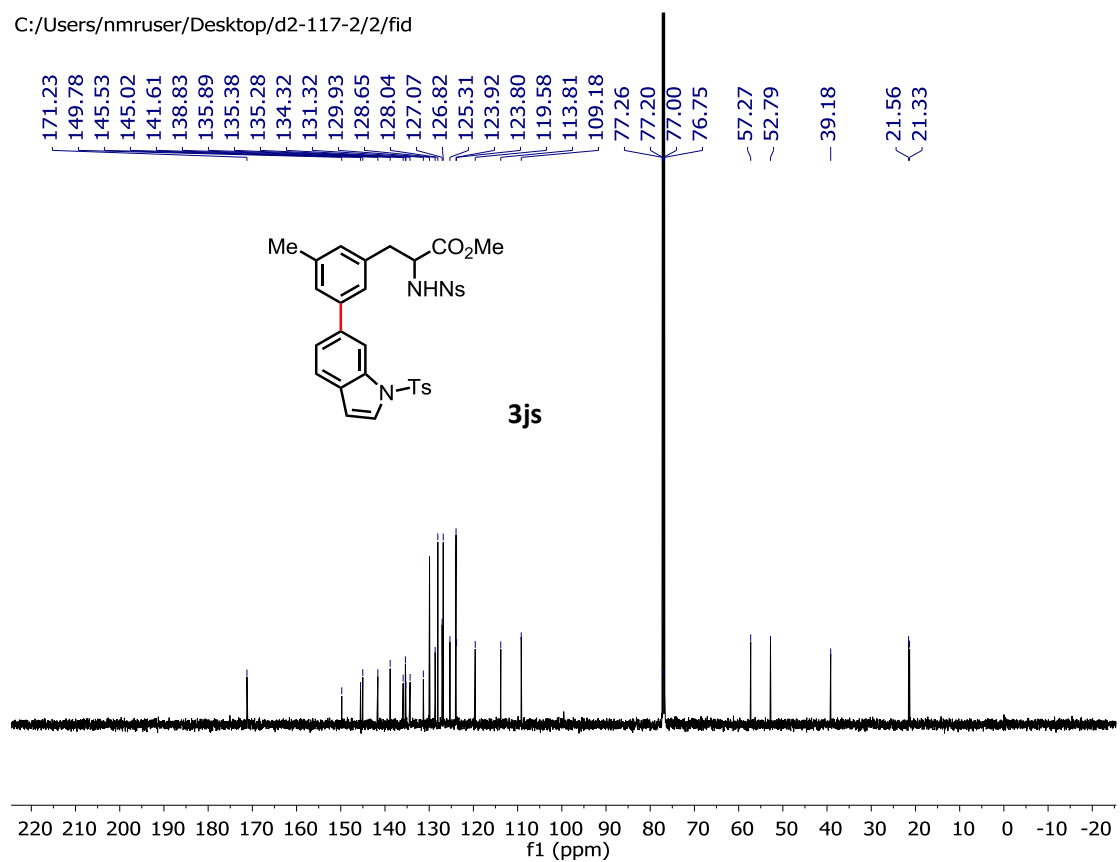

C:/Users/nmruser/Desktop/d2-117-3/1/fid

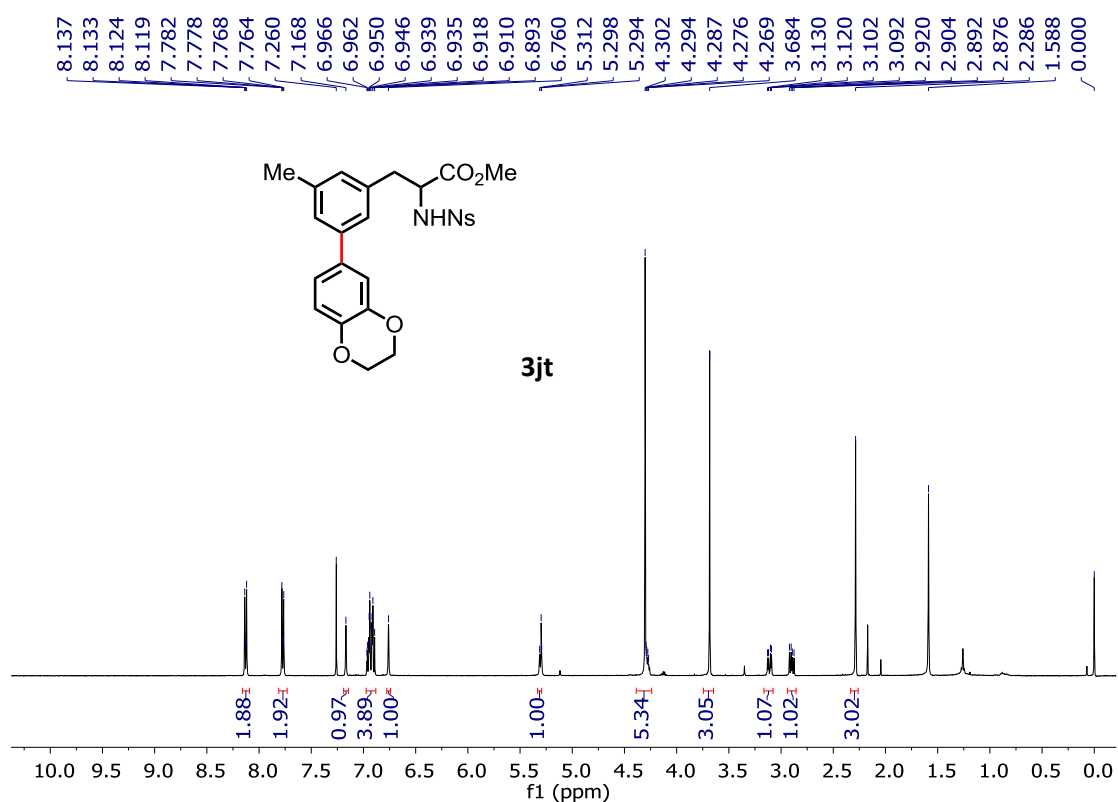

C:/Users/nmruser/Desktop/d2-117-3/2/fid

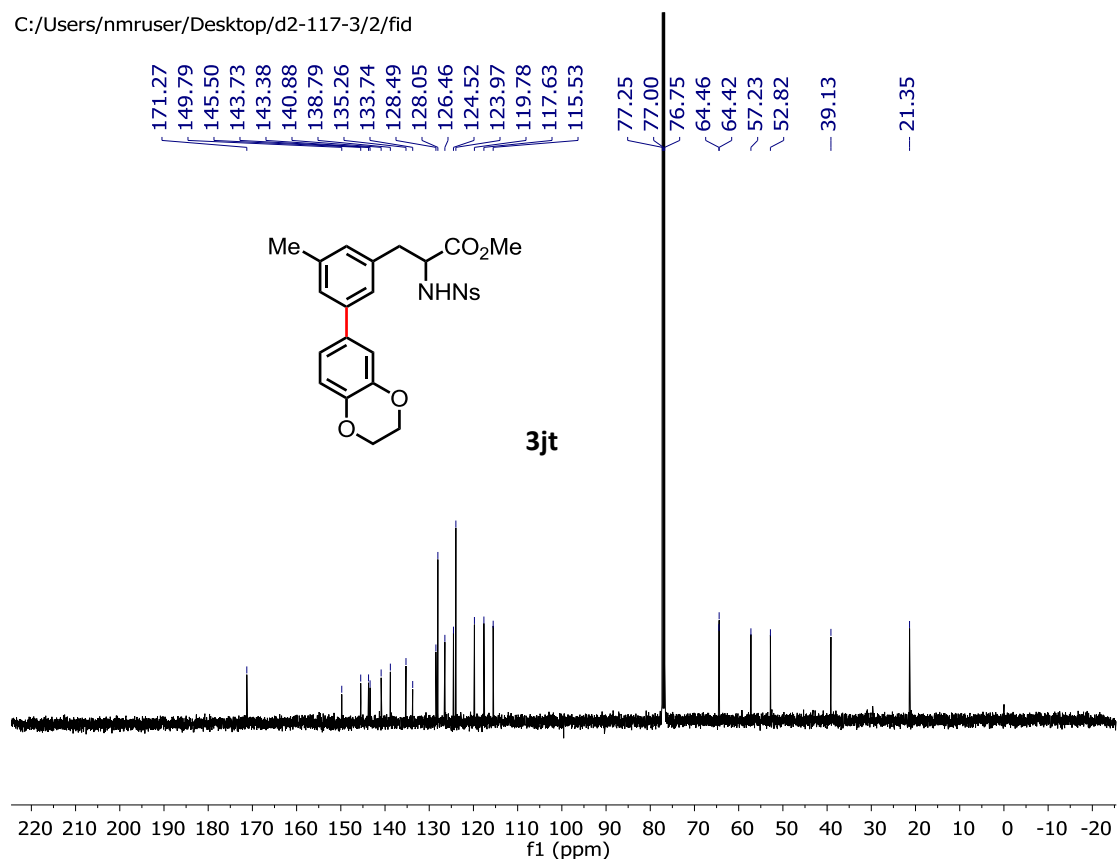

C:/Users/nmruser/Desktop/d2-105-13/2/fid

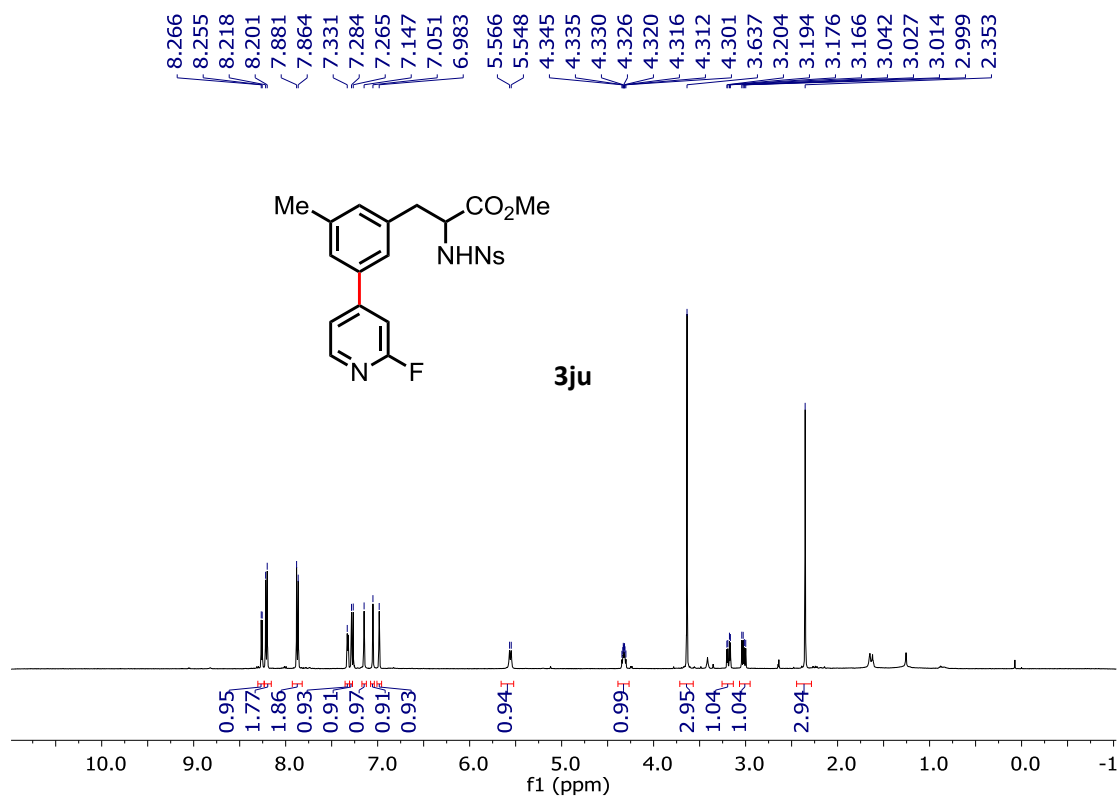

C:/Users/nmruser/Desktop/d2-105-13/3/fid

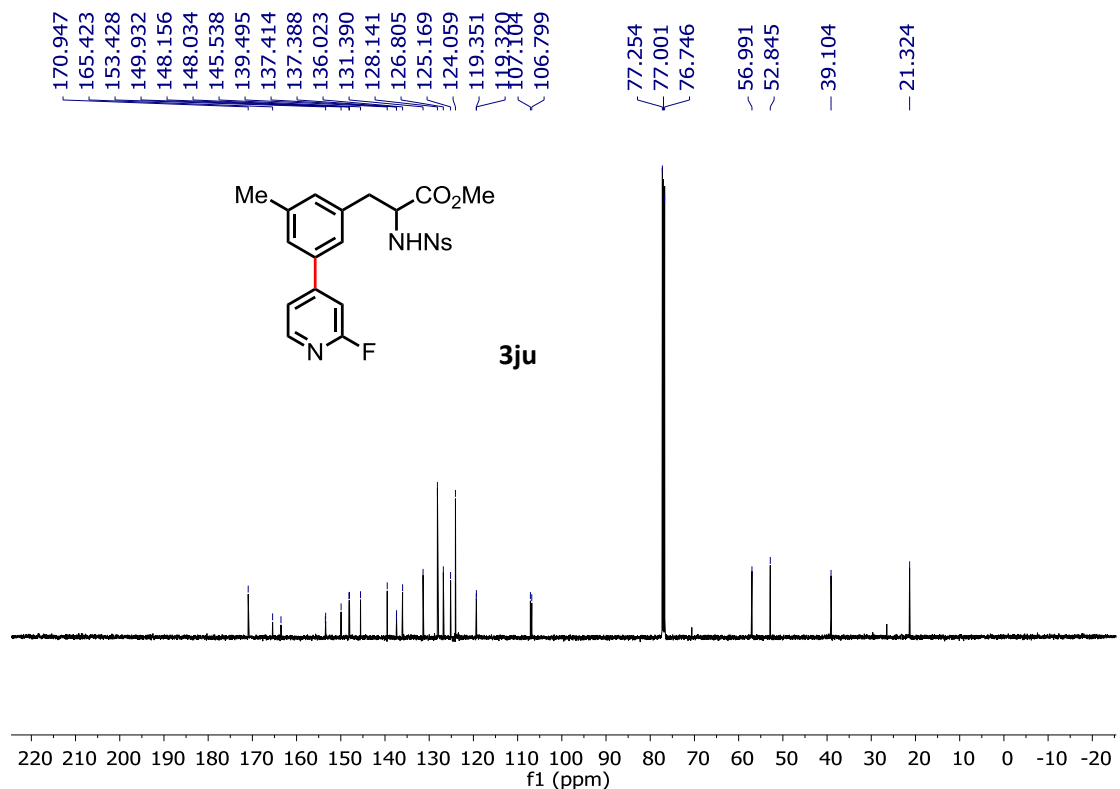

d2-117-7-2.2.fid  
H-1 Routine, DRX-500, BBO Probe

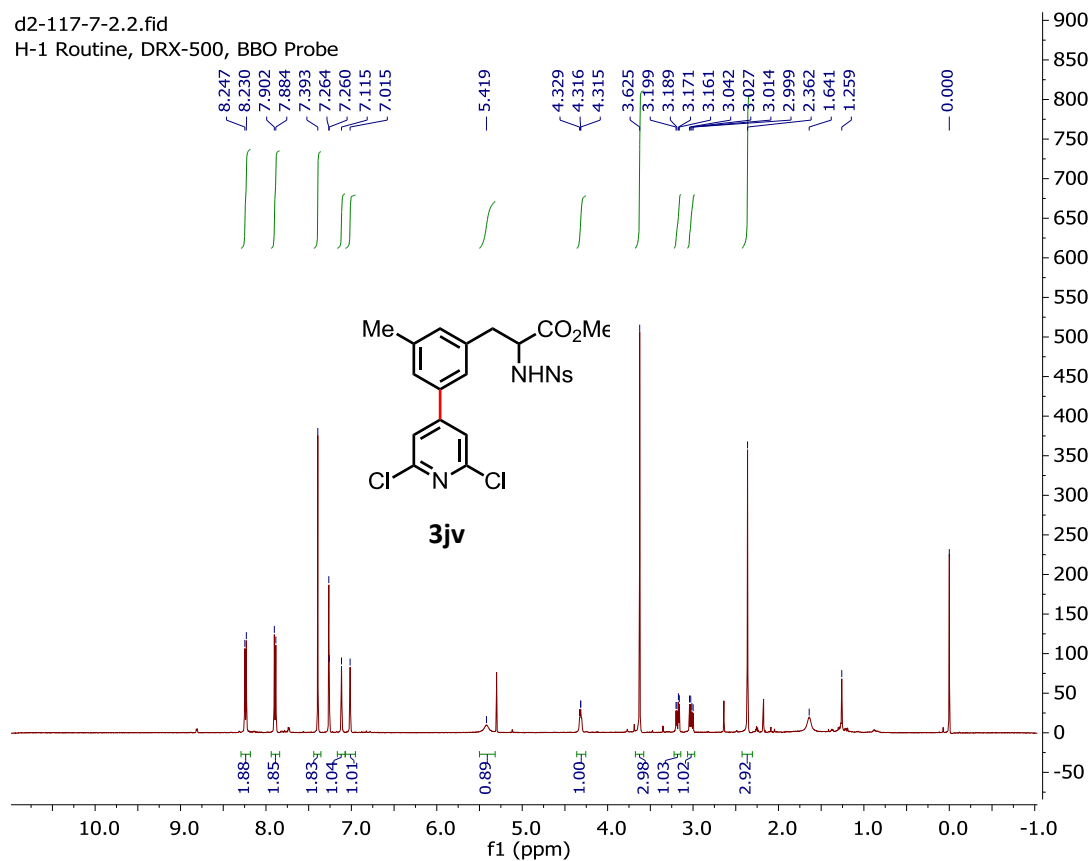

C:/Users/nmruser/Desktop/d2-117-9/4/fid

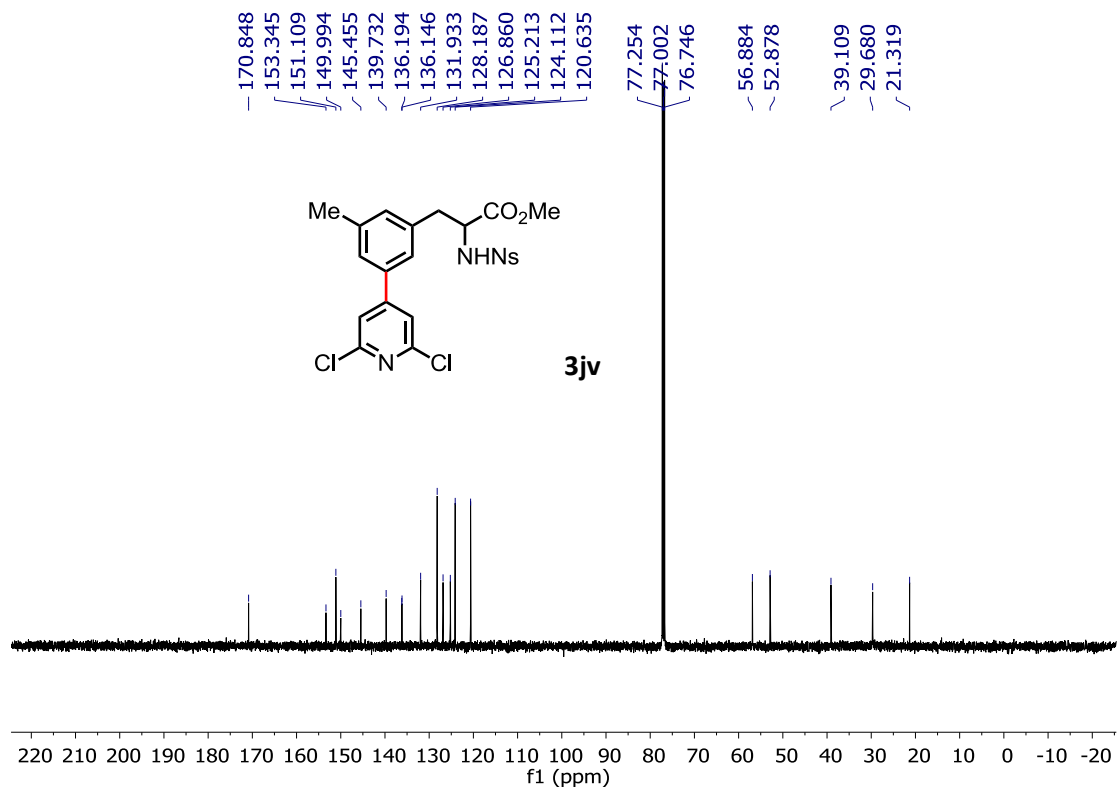

C:/Users/nmruser/Desktop/d2-90-2-2 redo/1/fid

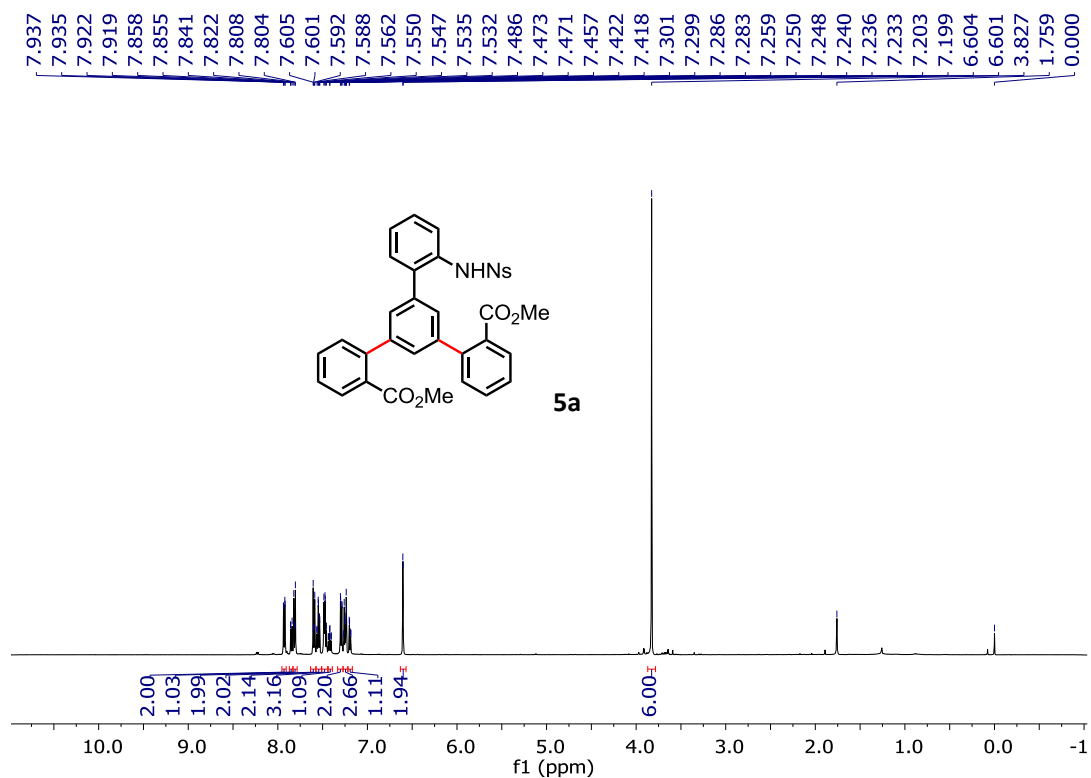

C:/Users/nmruser/Desktop/d2-90-2-2 redo/2/fid

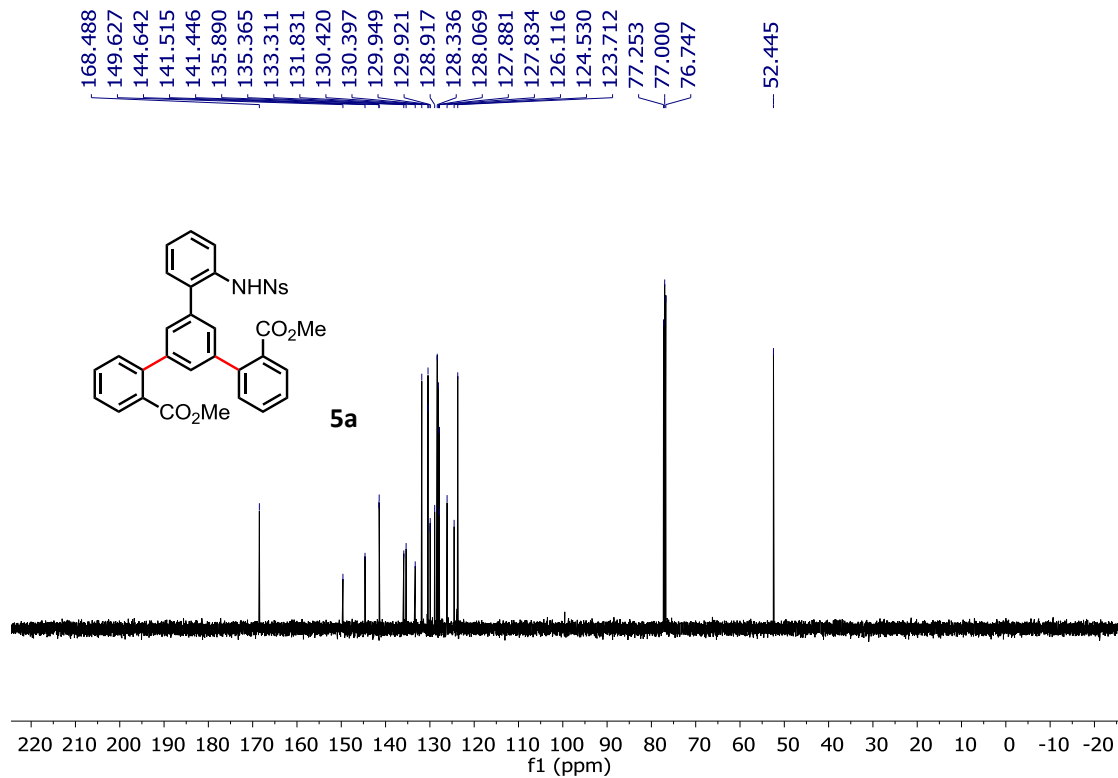

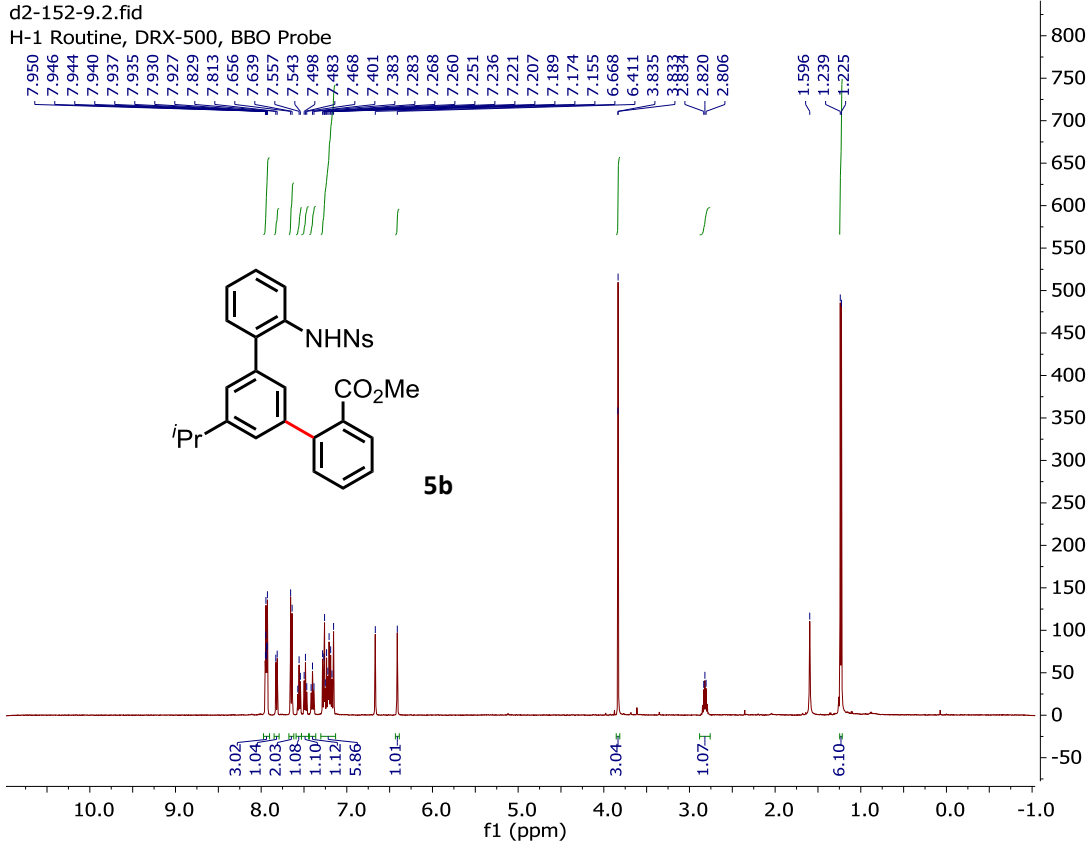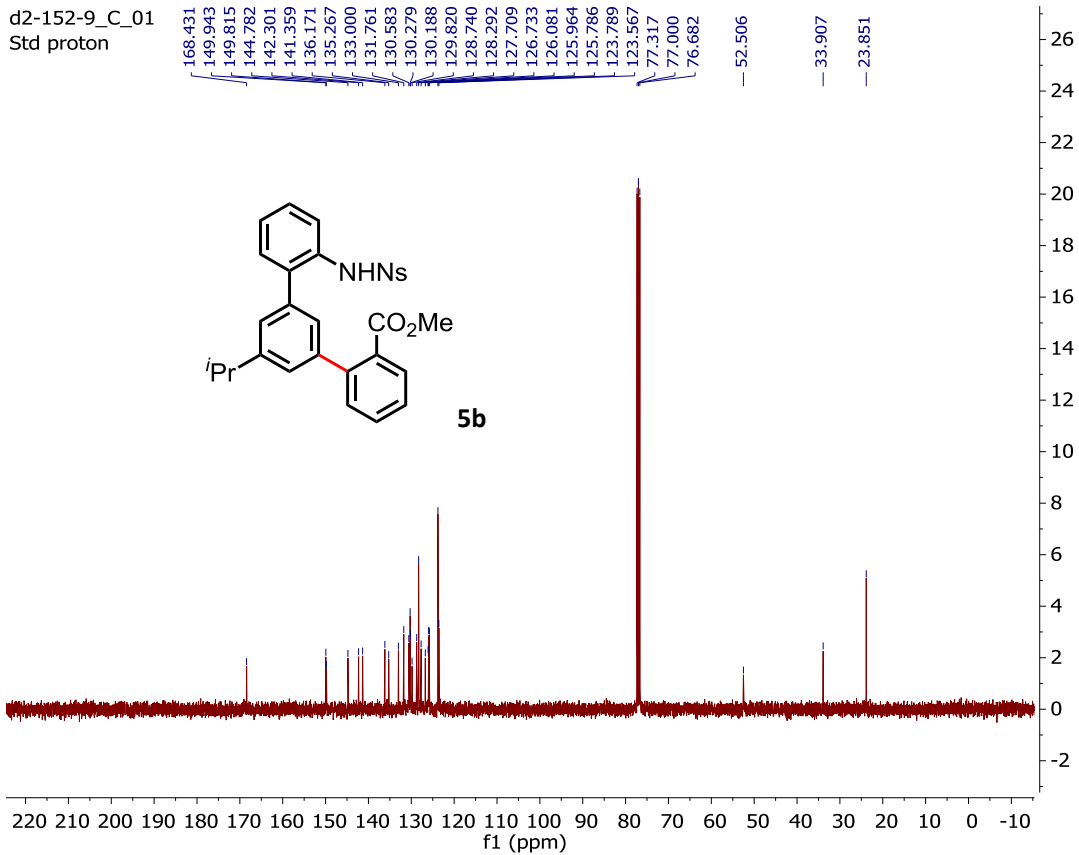



C:/Users/nmruser/Desktop/d2-152-1/1/fid

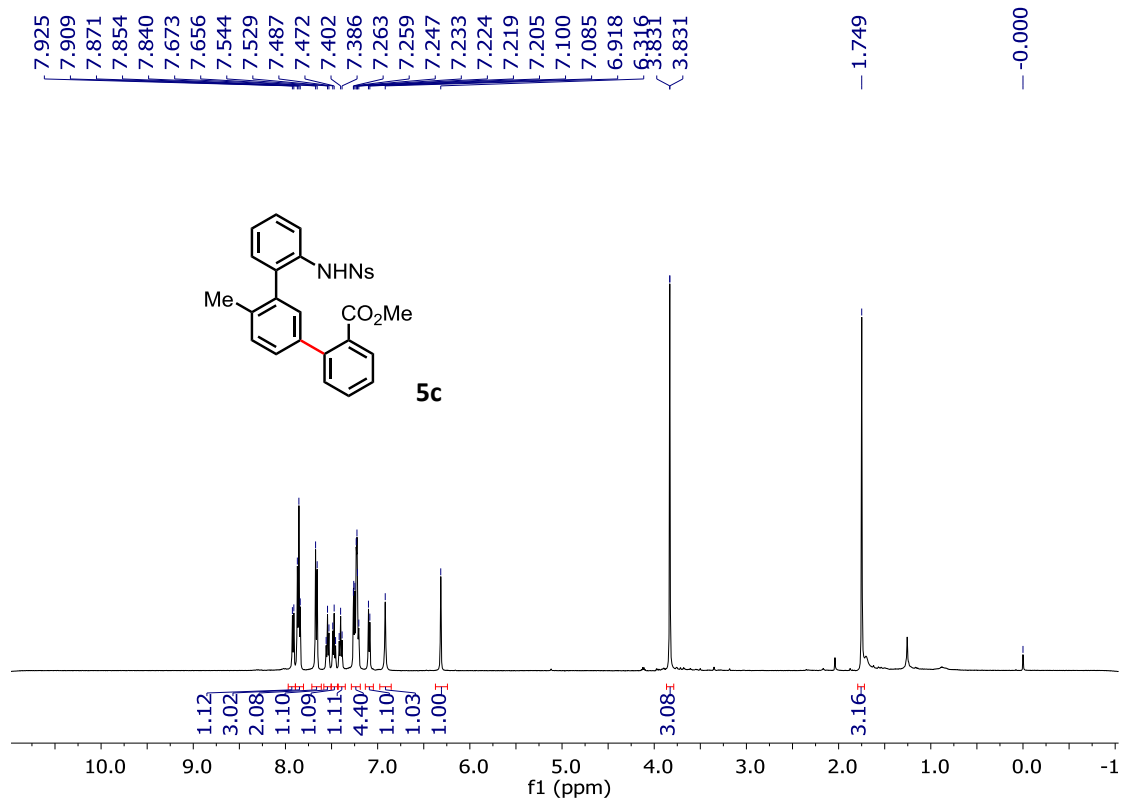

C:/Users/nmruser/Desktop/d2-152-1/2/fid

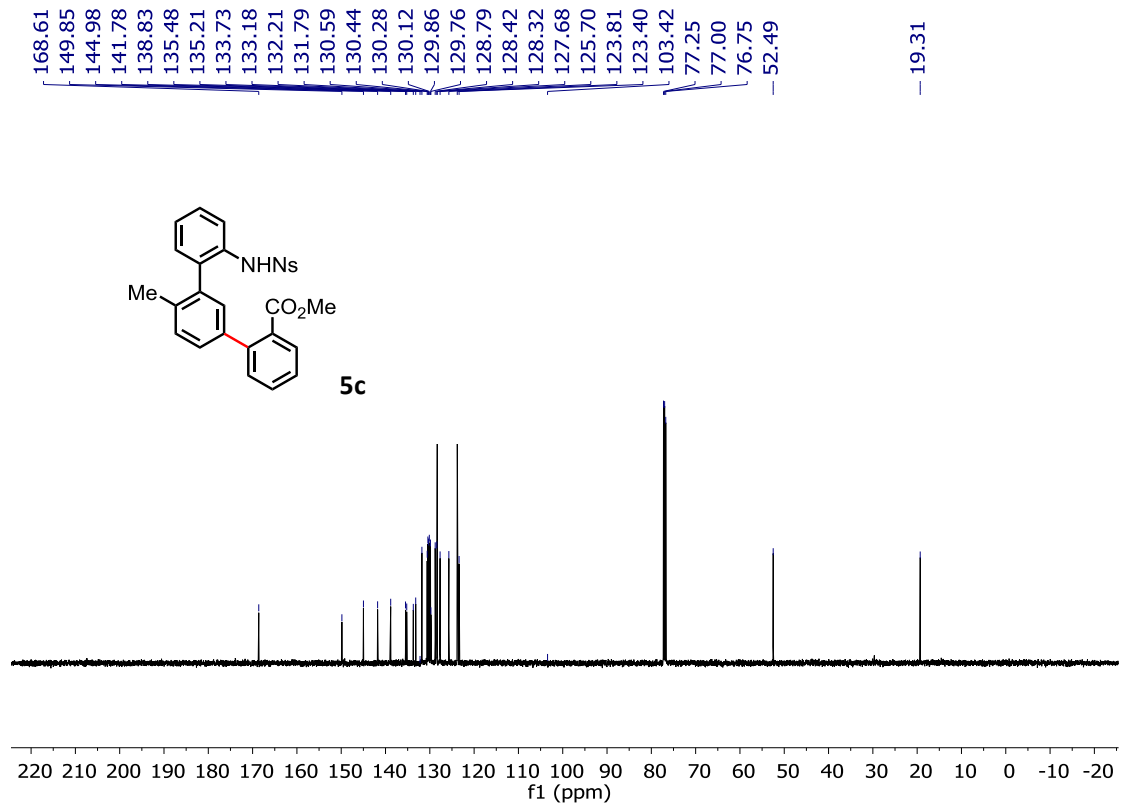

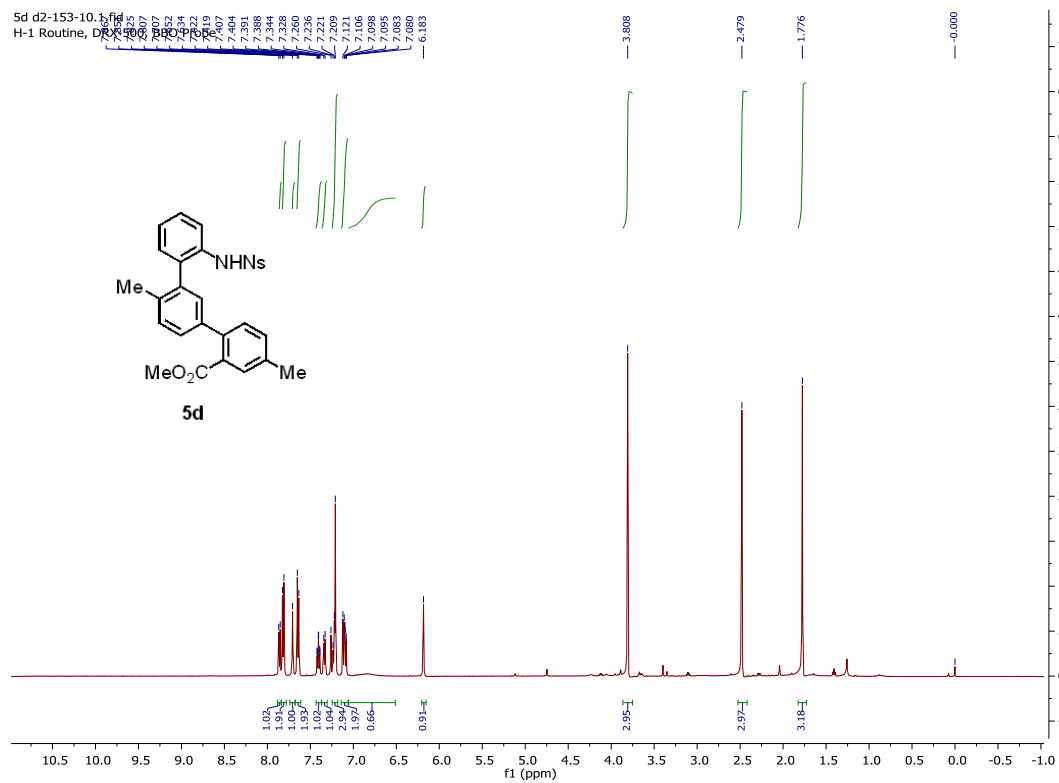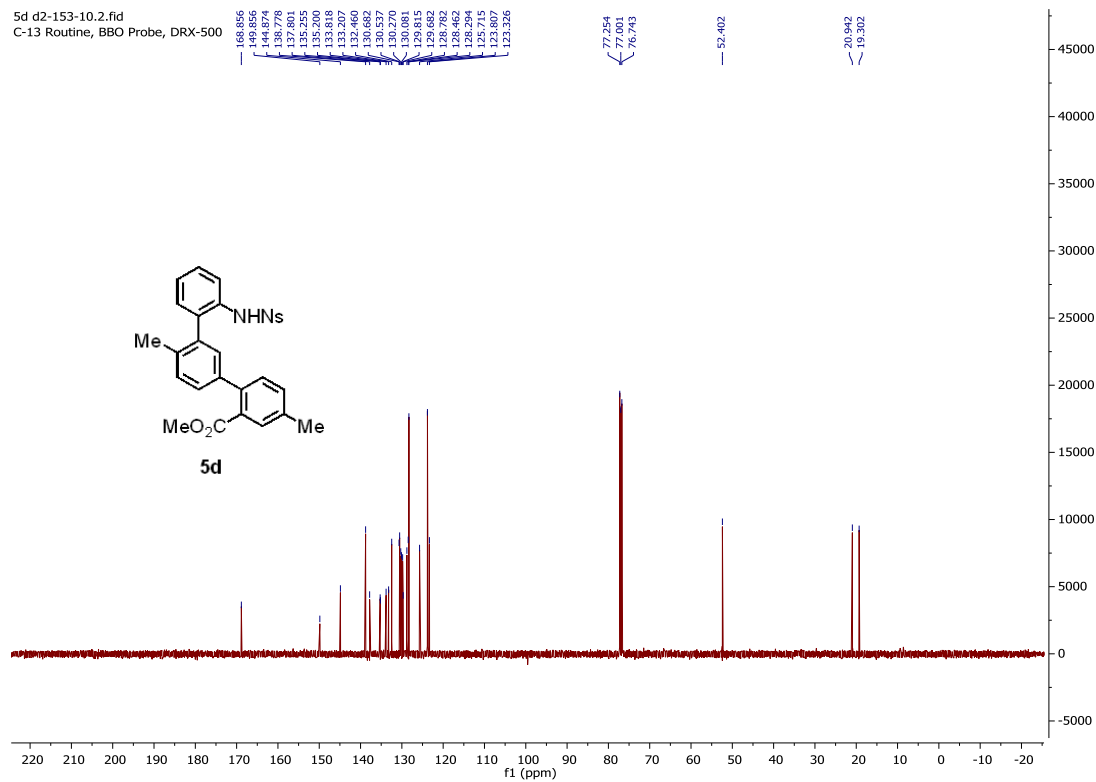





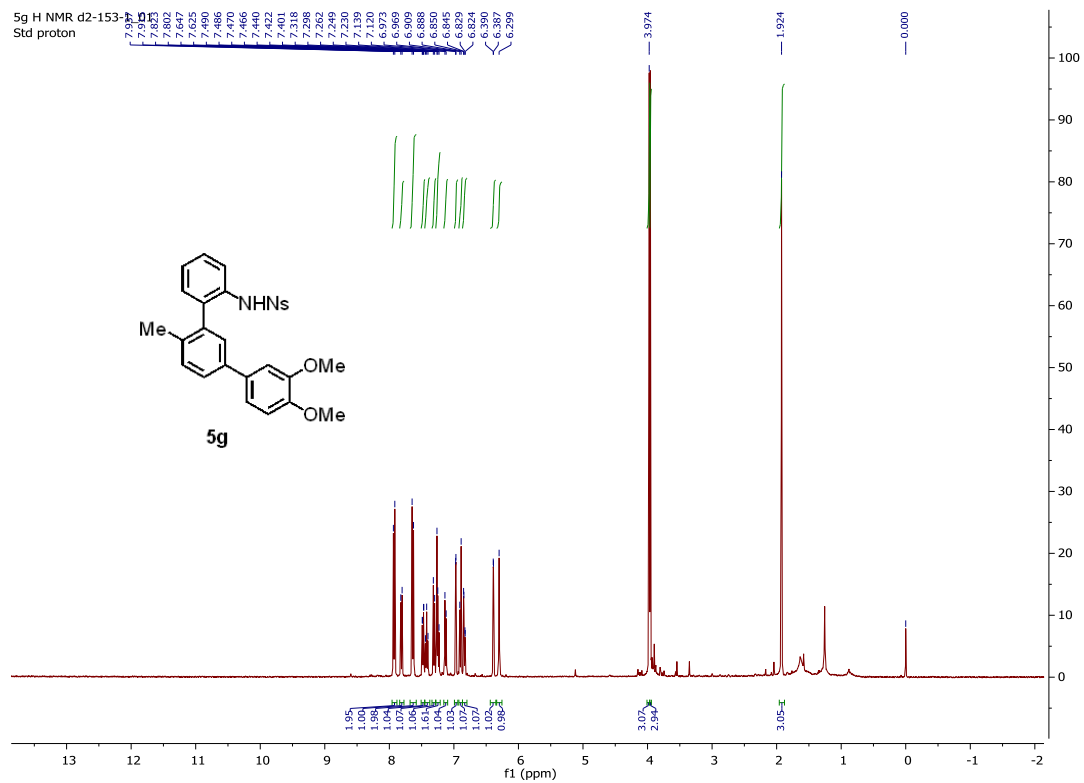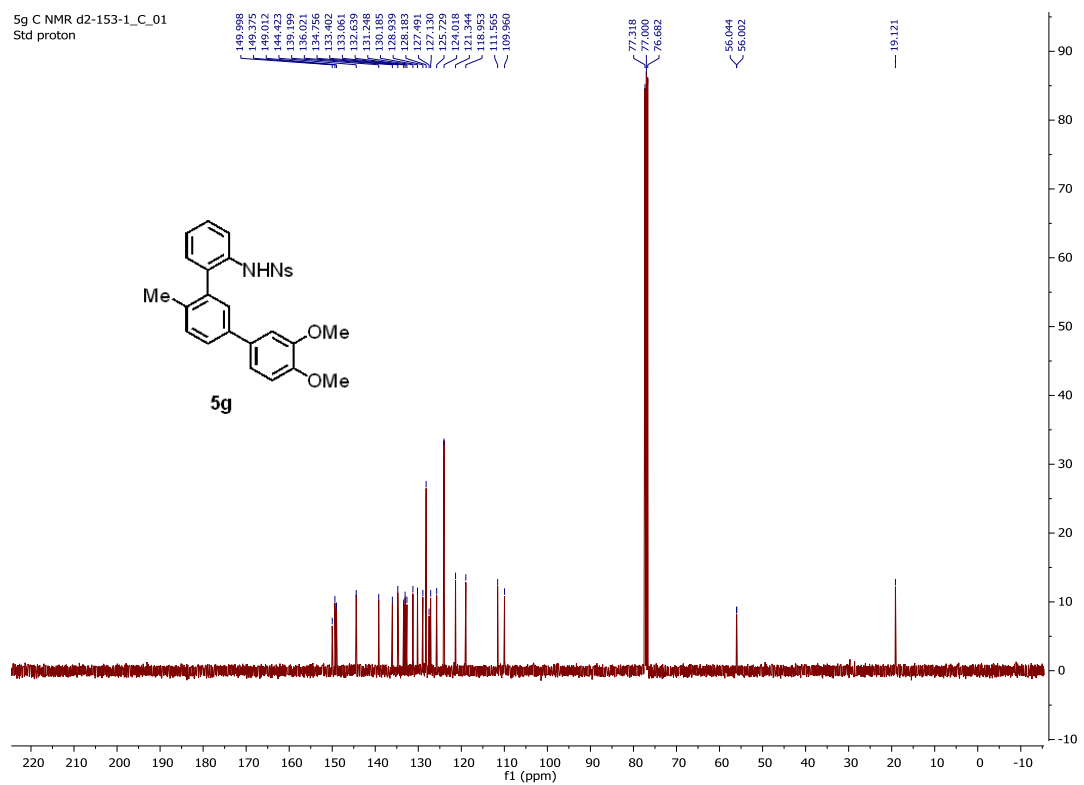

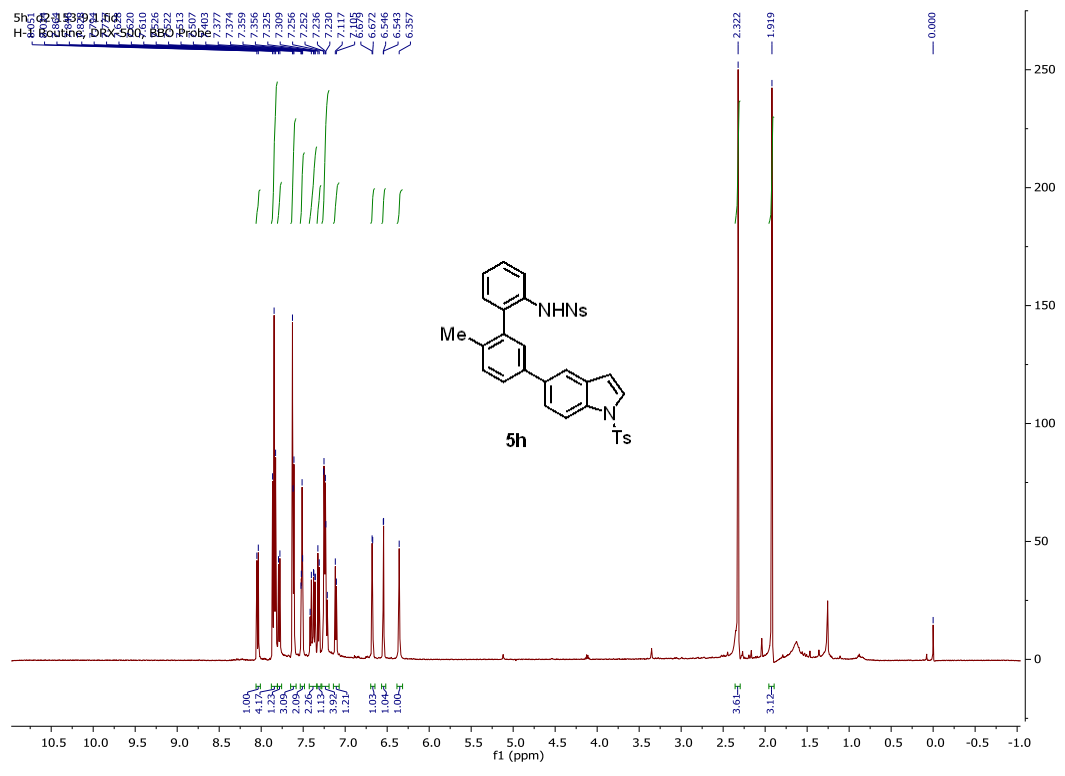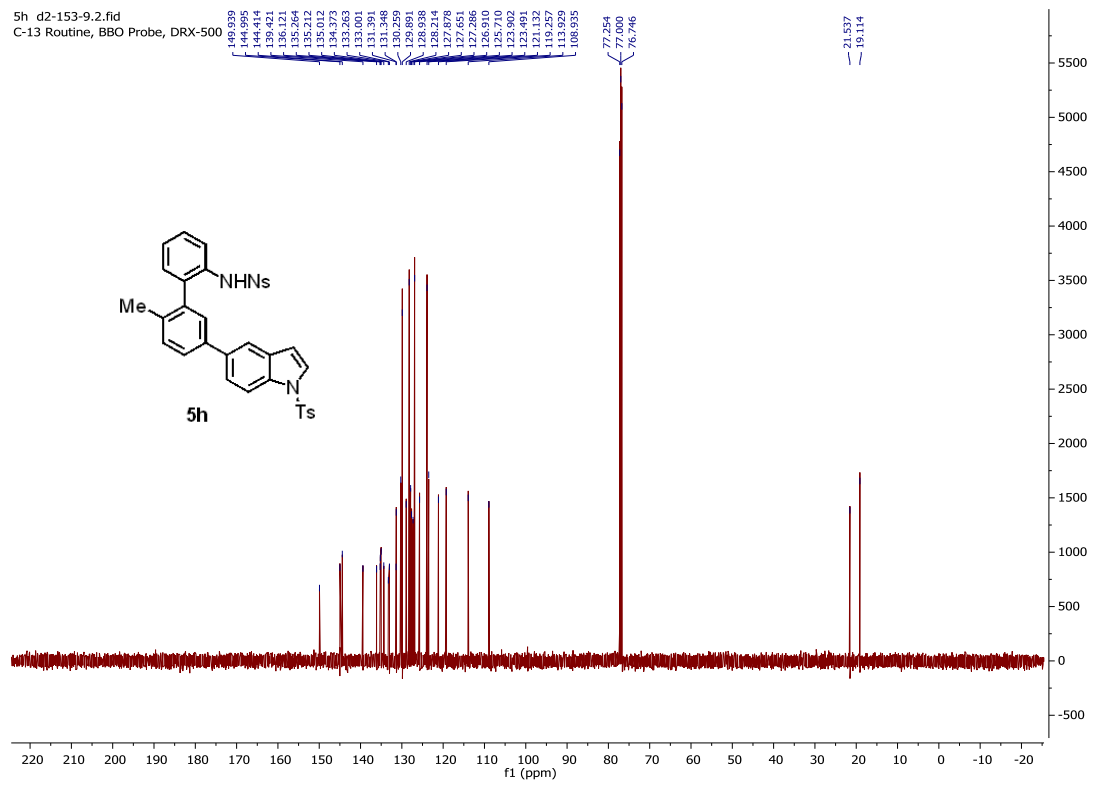

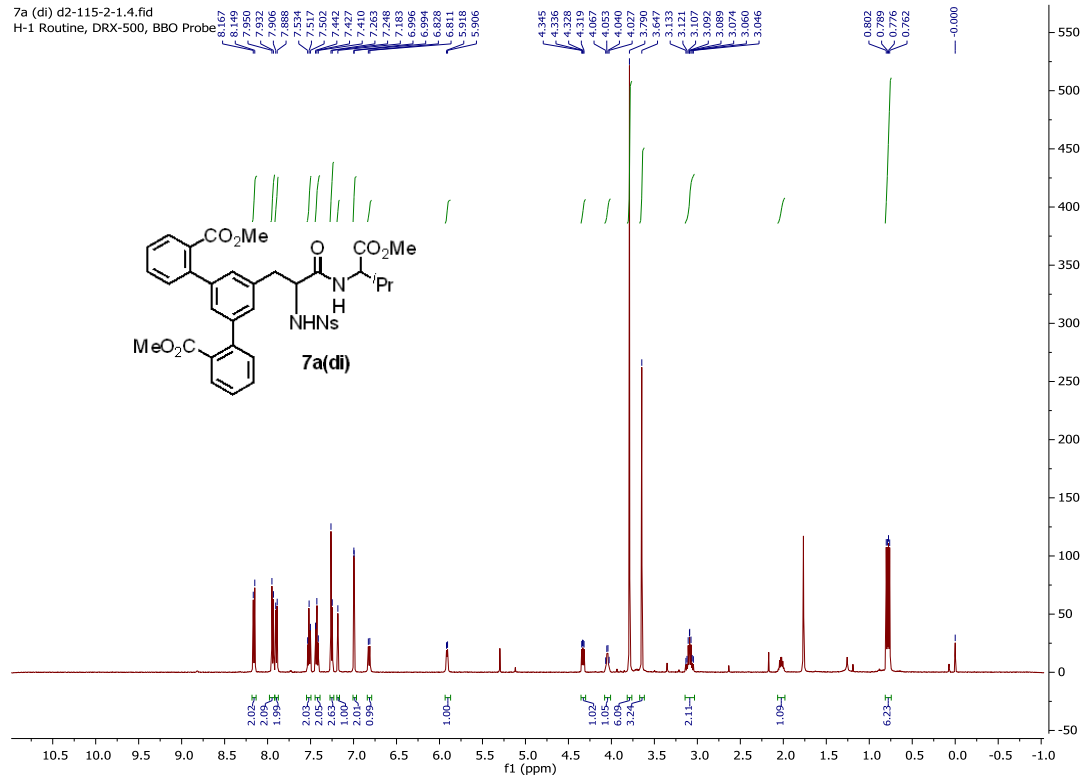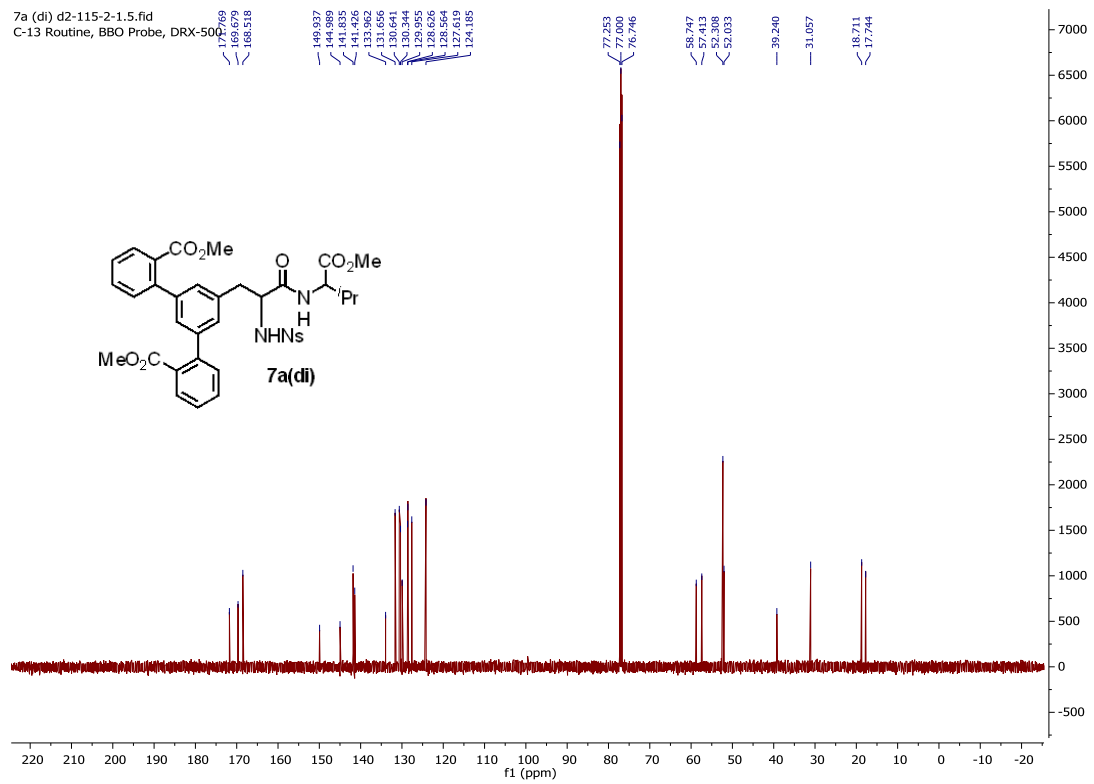

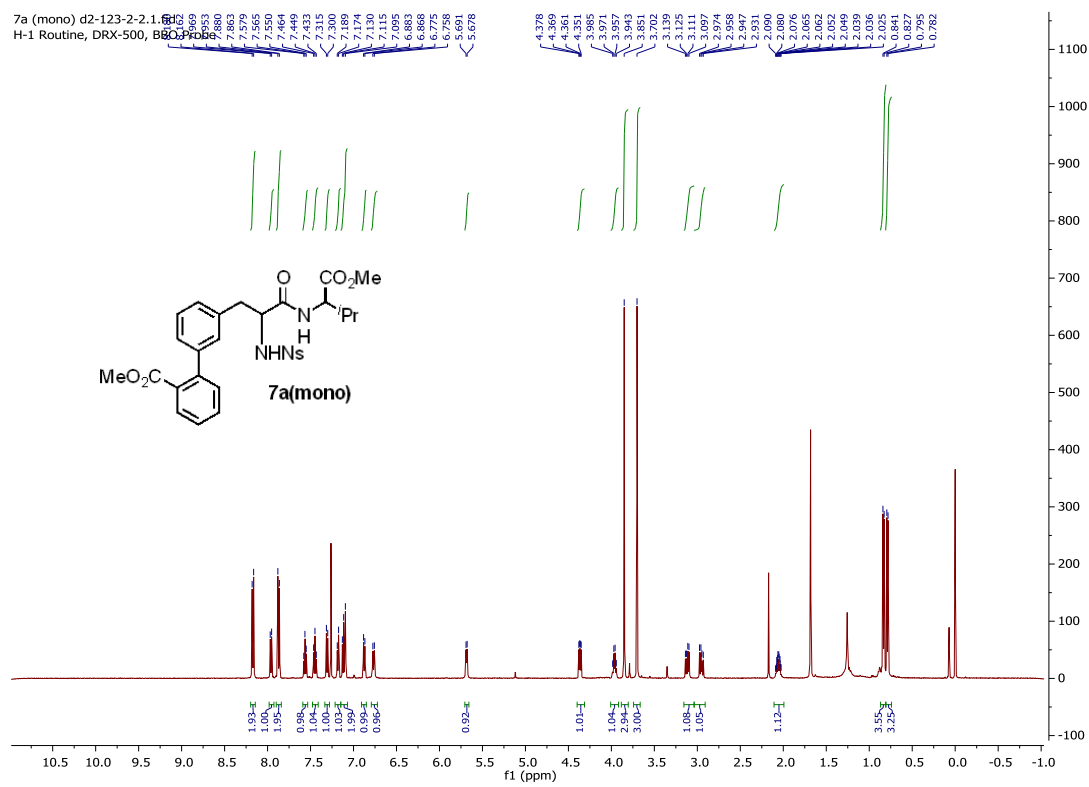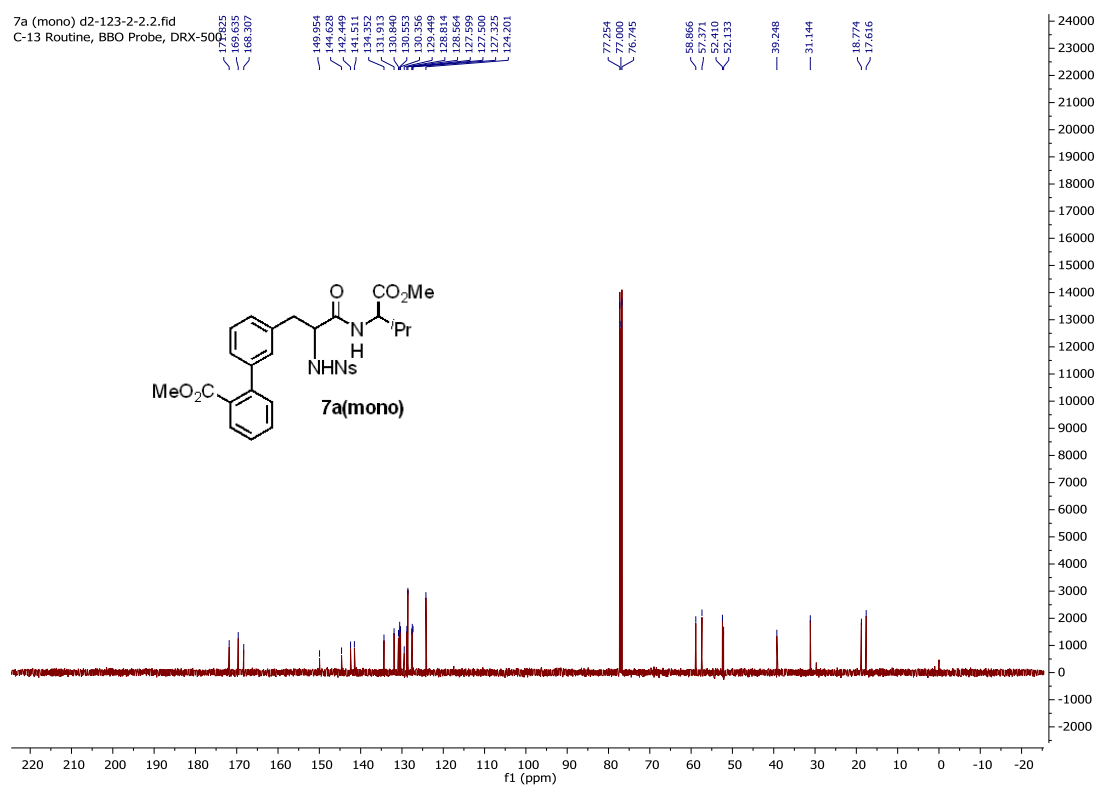



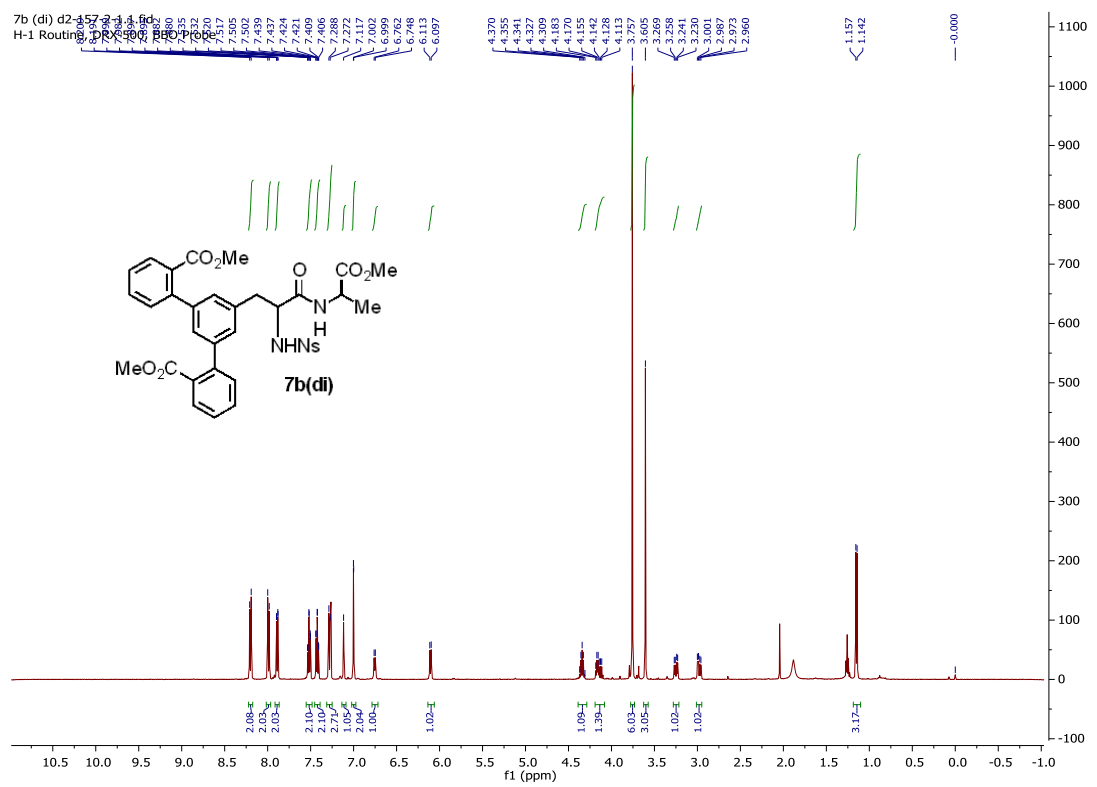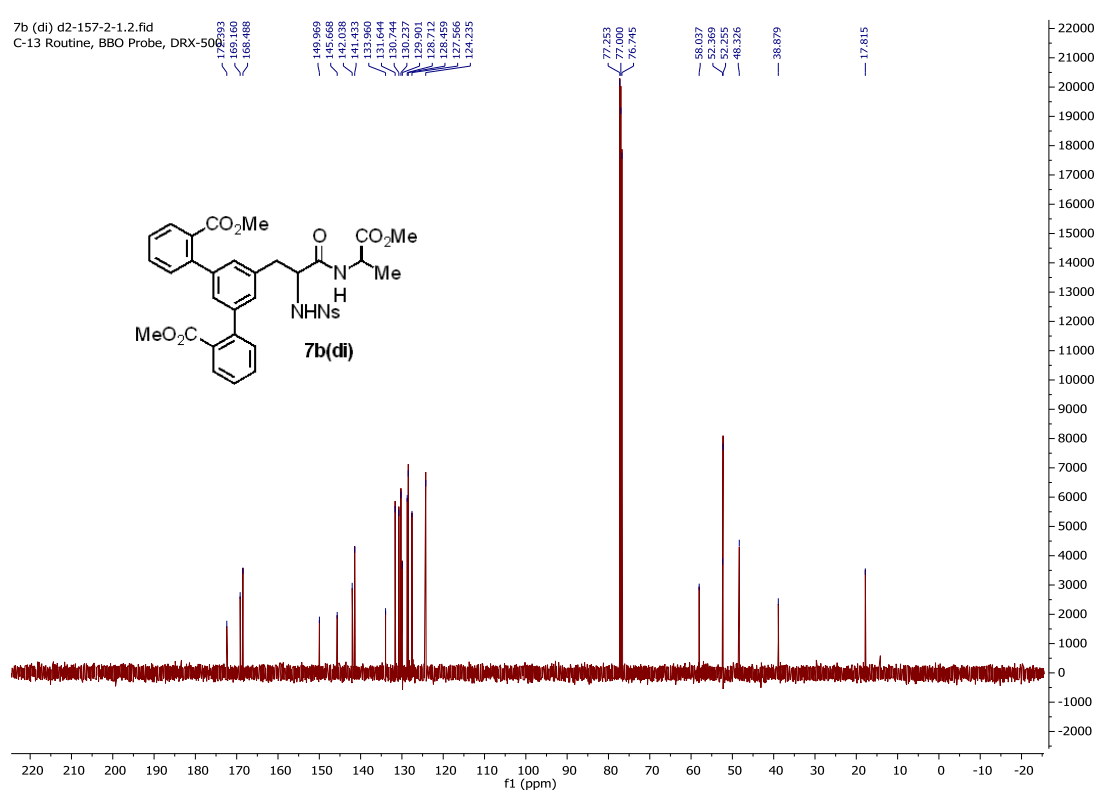

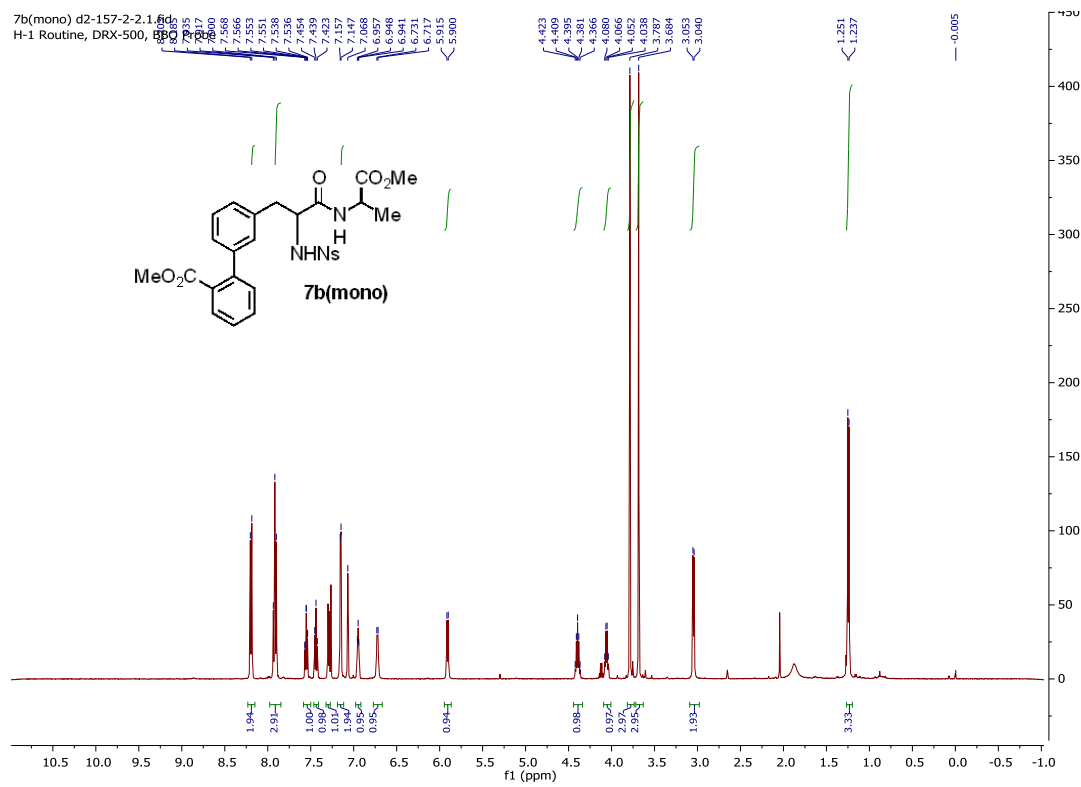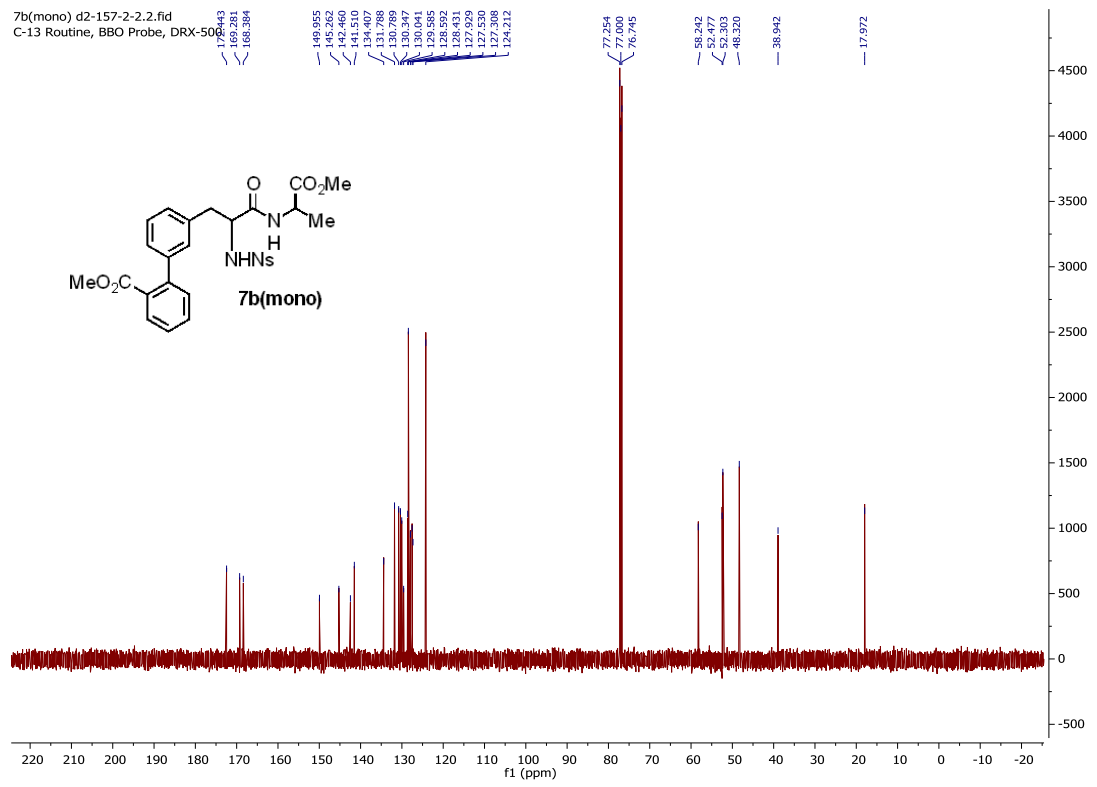

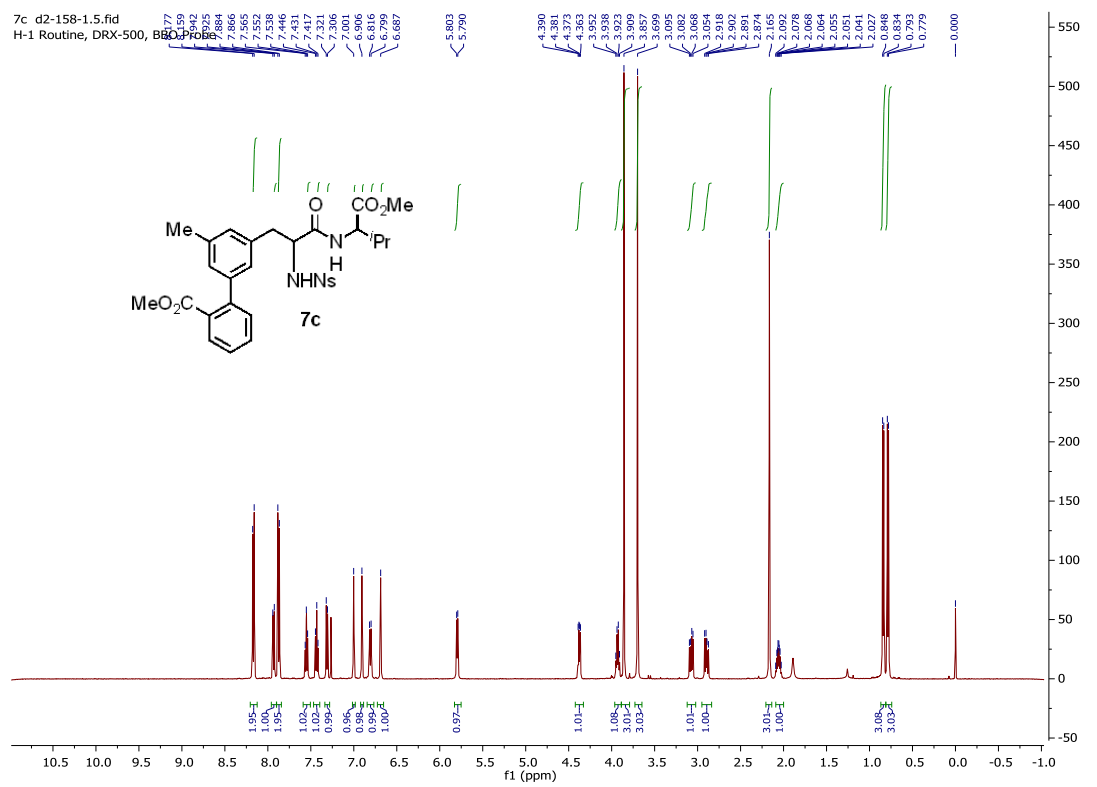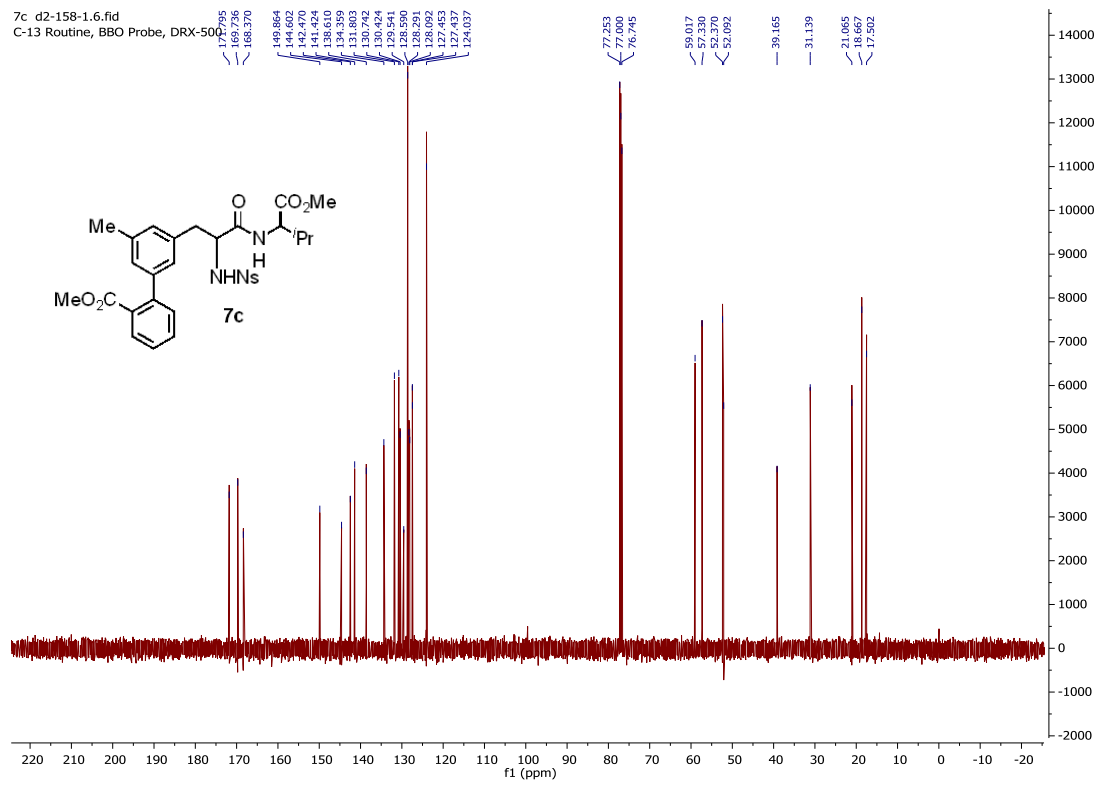

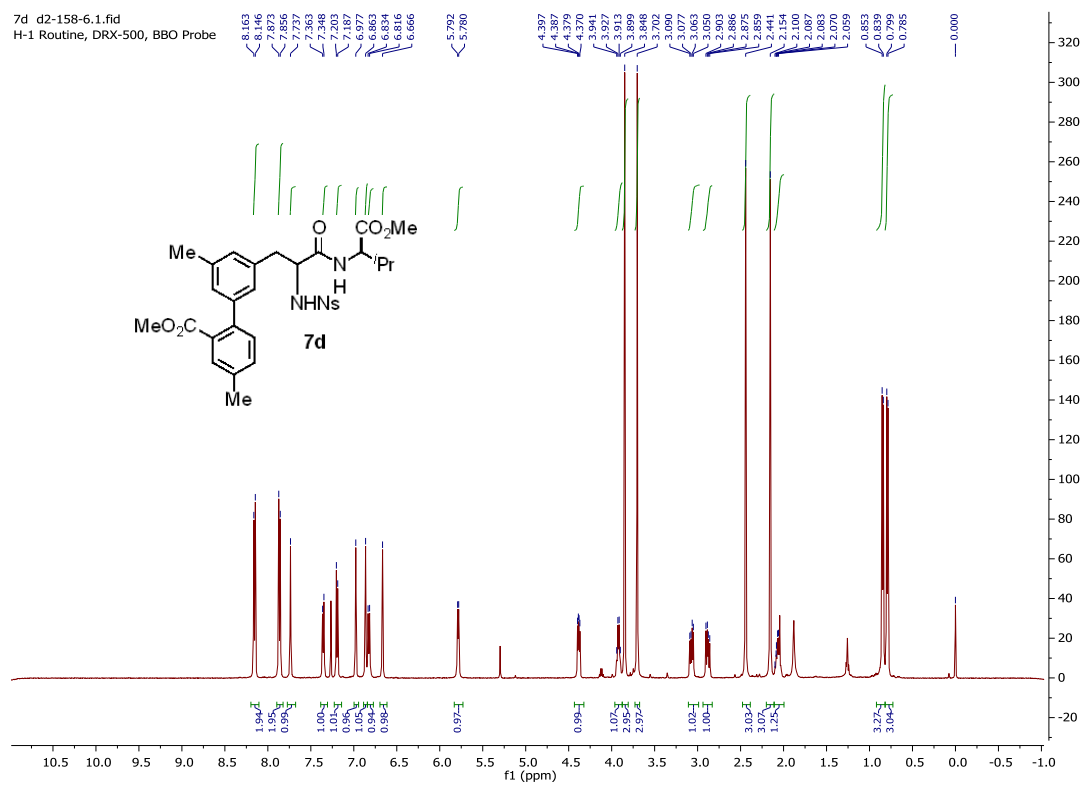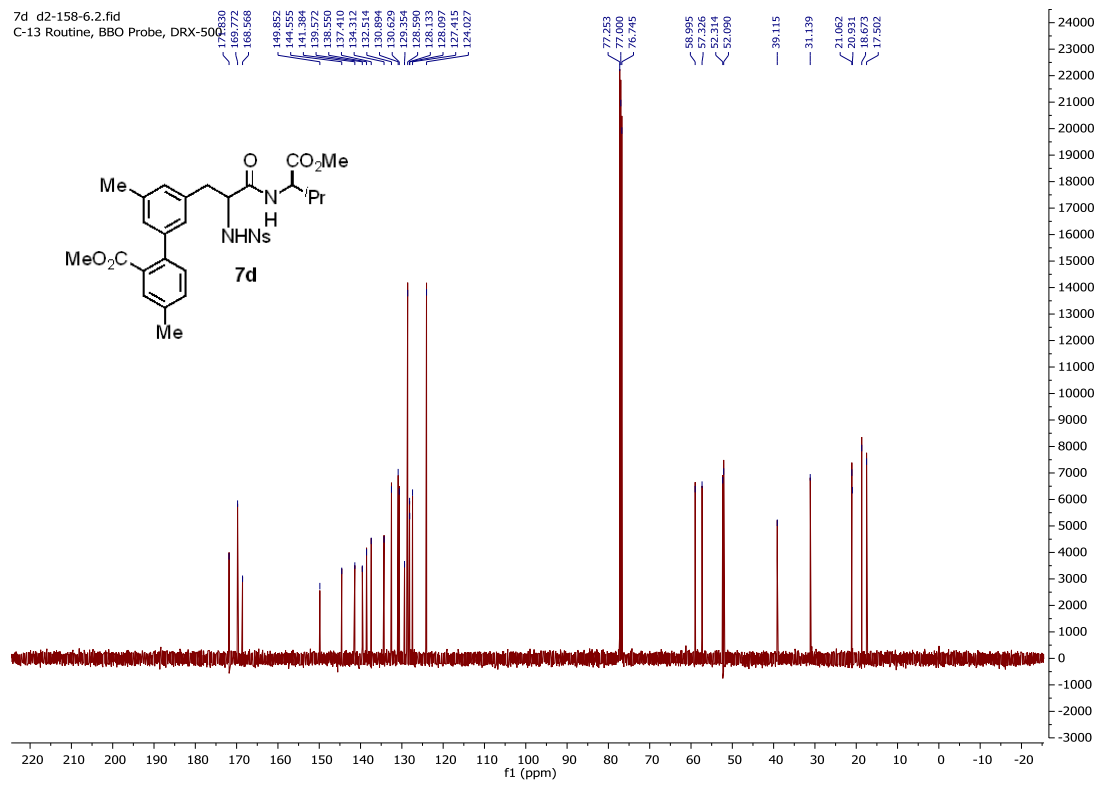

d2-46-p3\_01  
Std proton

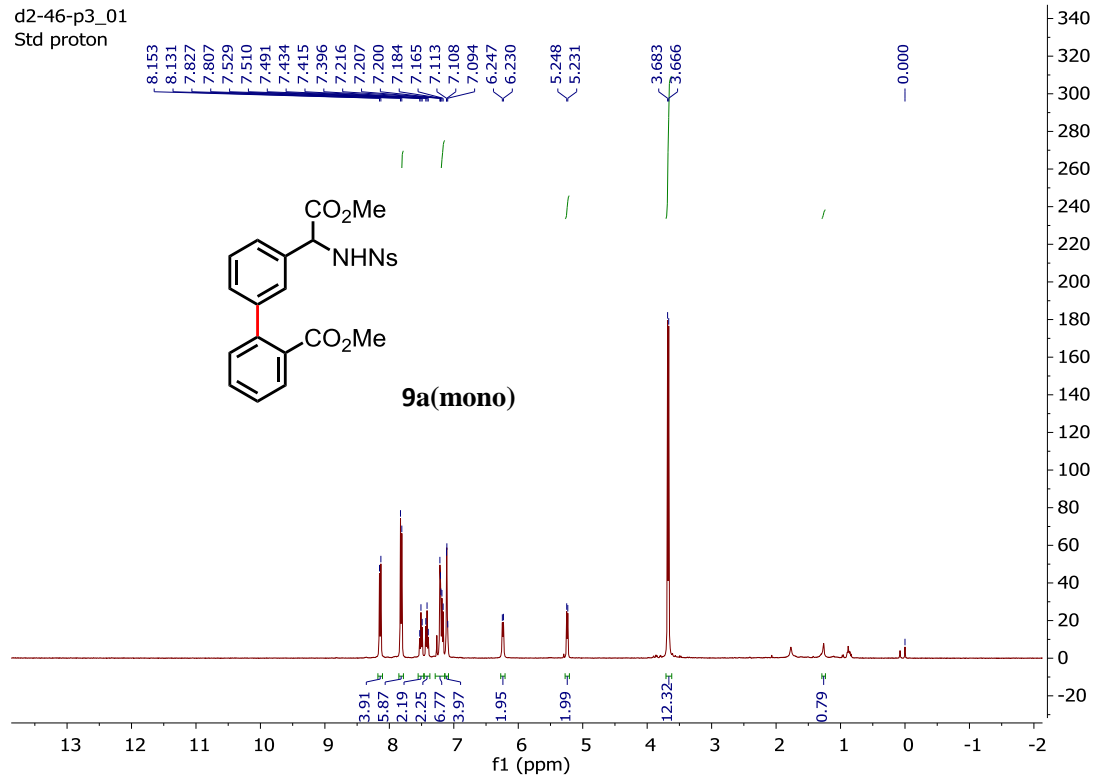

d2-46-p3\_C\_01  
Std proton

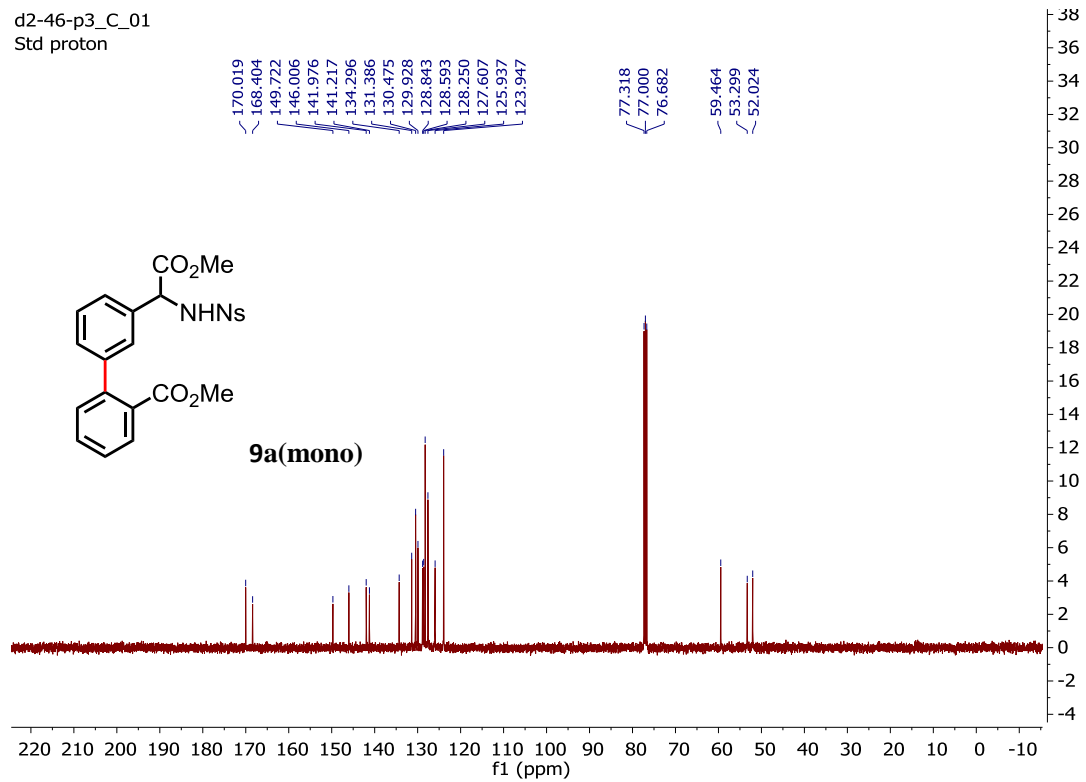

d2-46-p2\_01  
Std proton

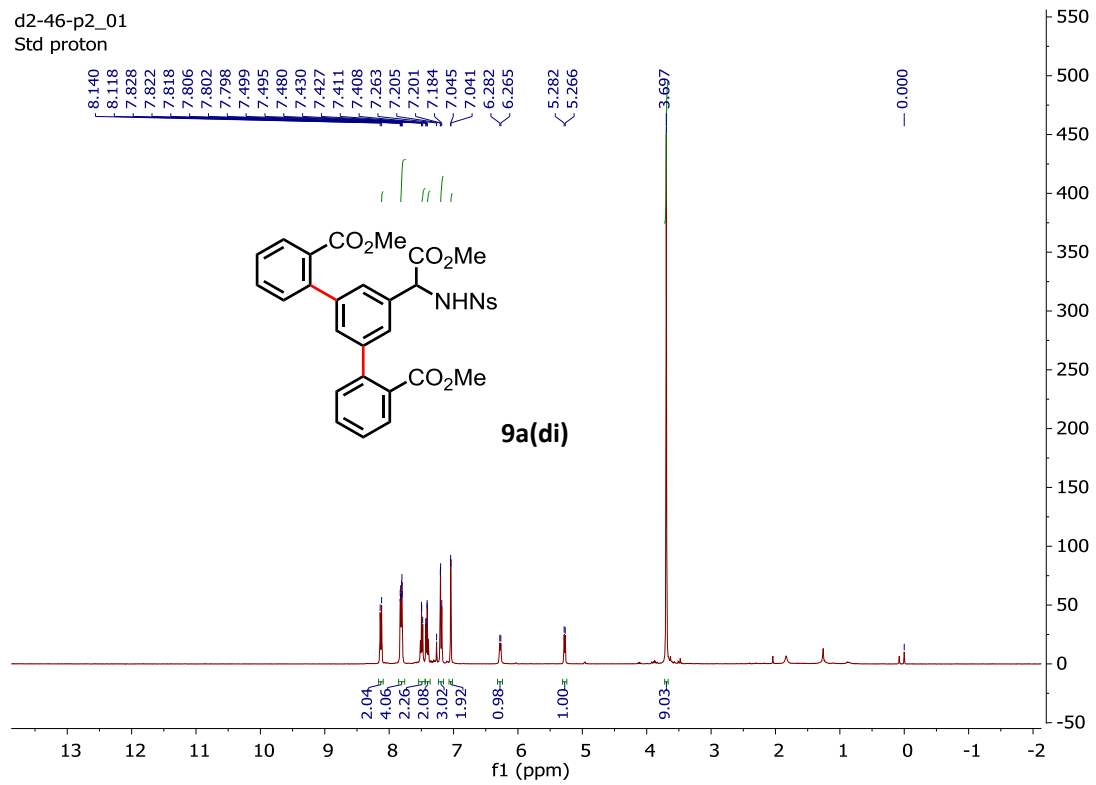

d2-46-p2\_C\_01  
Std proton

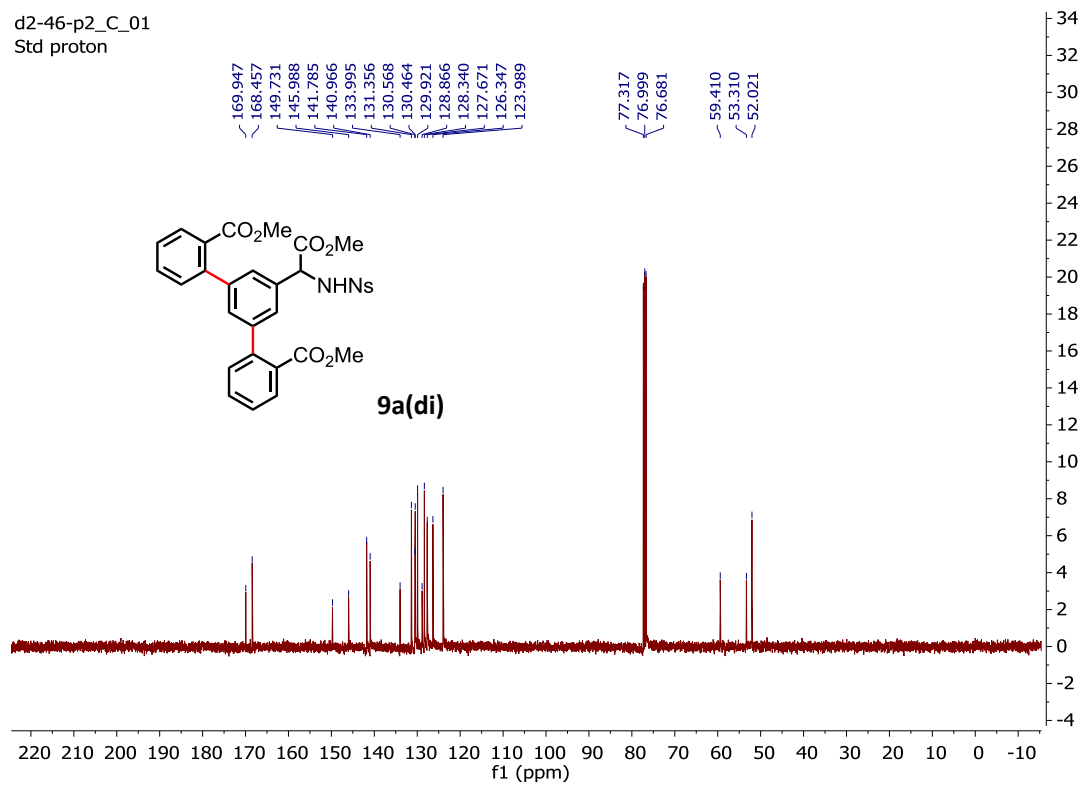

C:/Users/nmruser/Desktop/d2-97-10-2/4/fid

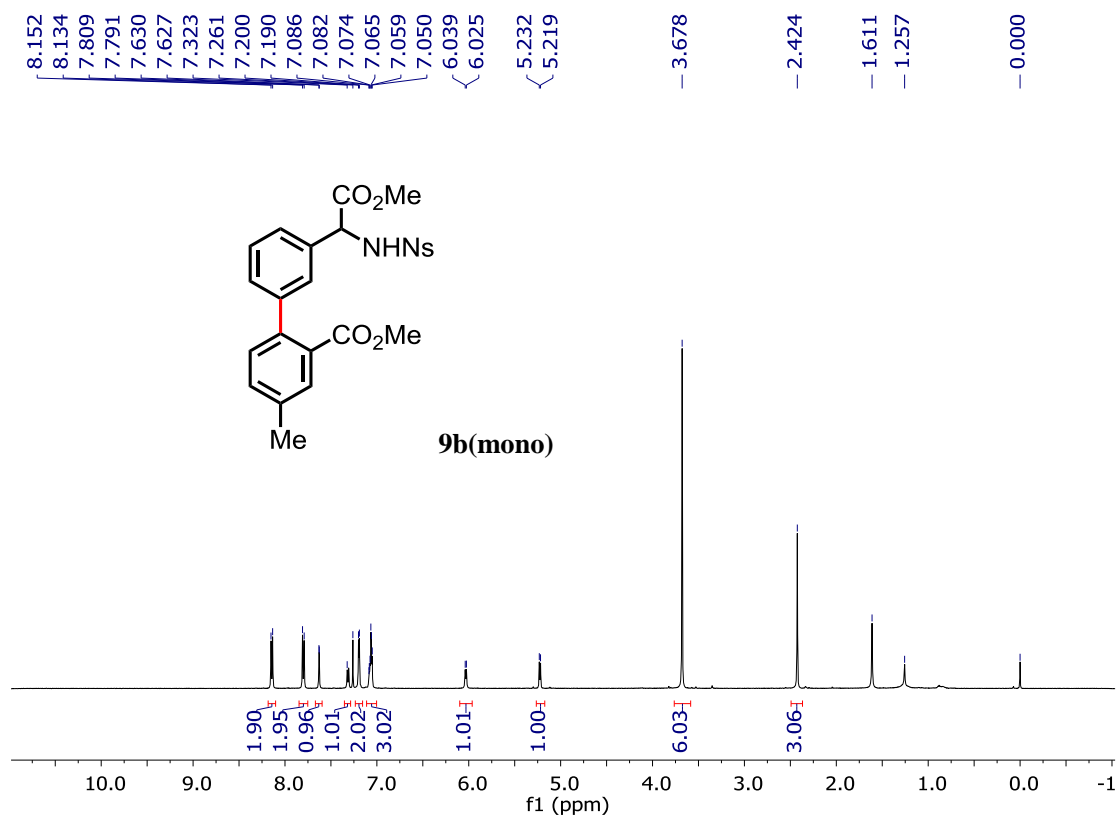

C:/Users/nmruser/Desktop/d2-97-10-2/5/fid

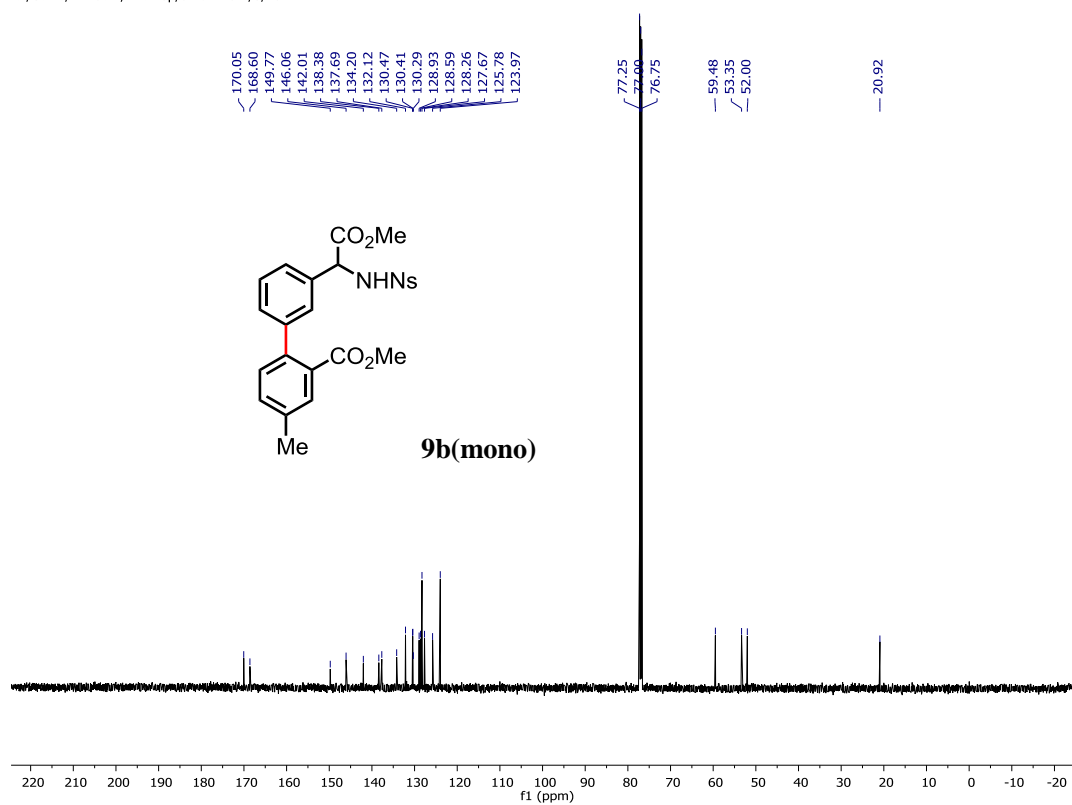

d2-97-11-1.1.fid  
H-1 Routine, DRX-500, BBO Probe

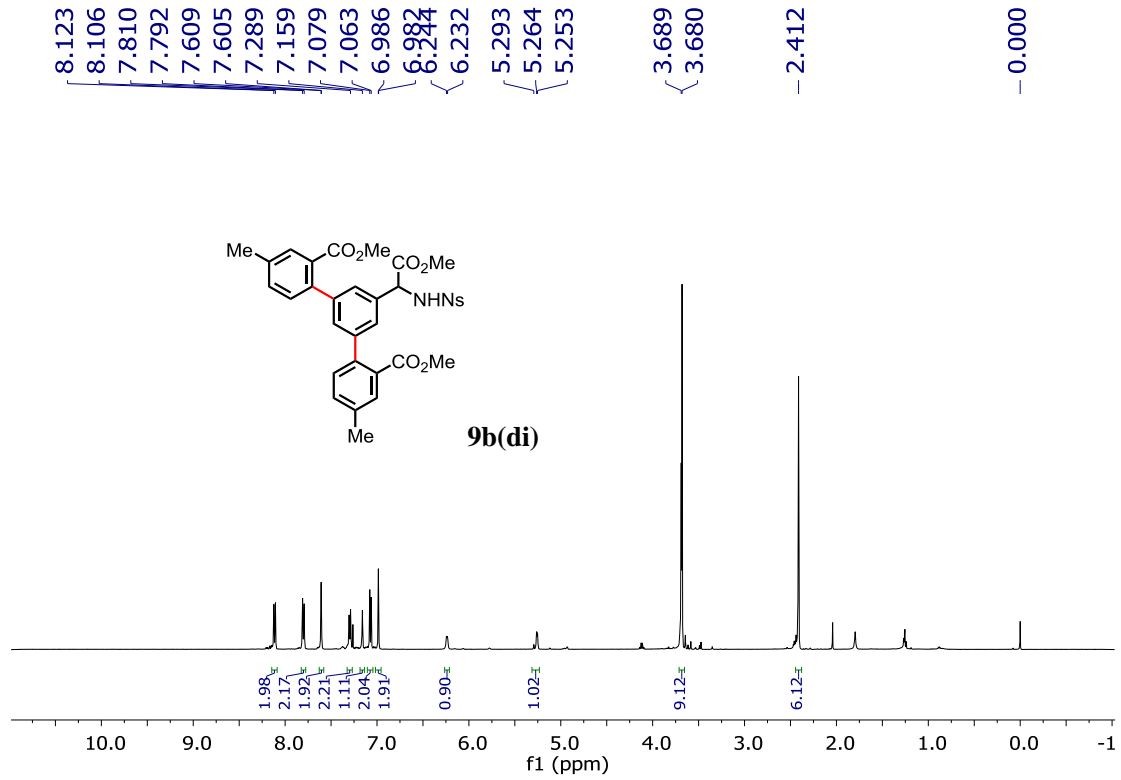

d2-97-11-1.1.fid  
C-13 Routine, DRX-500, BBO Probe

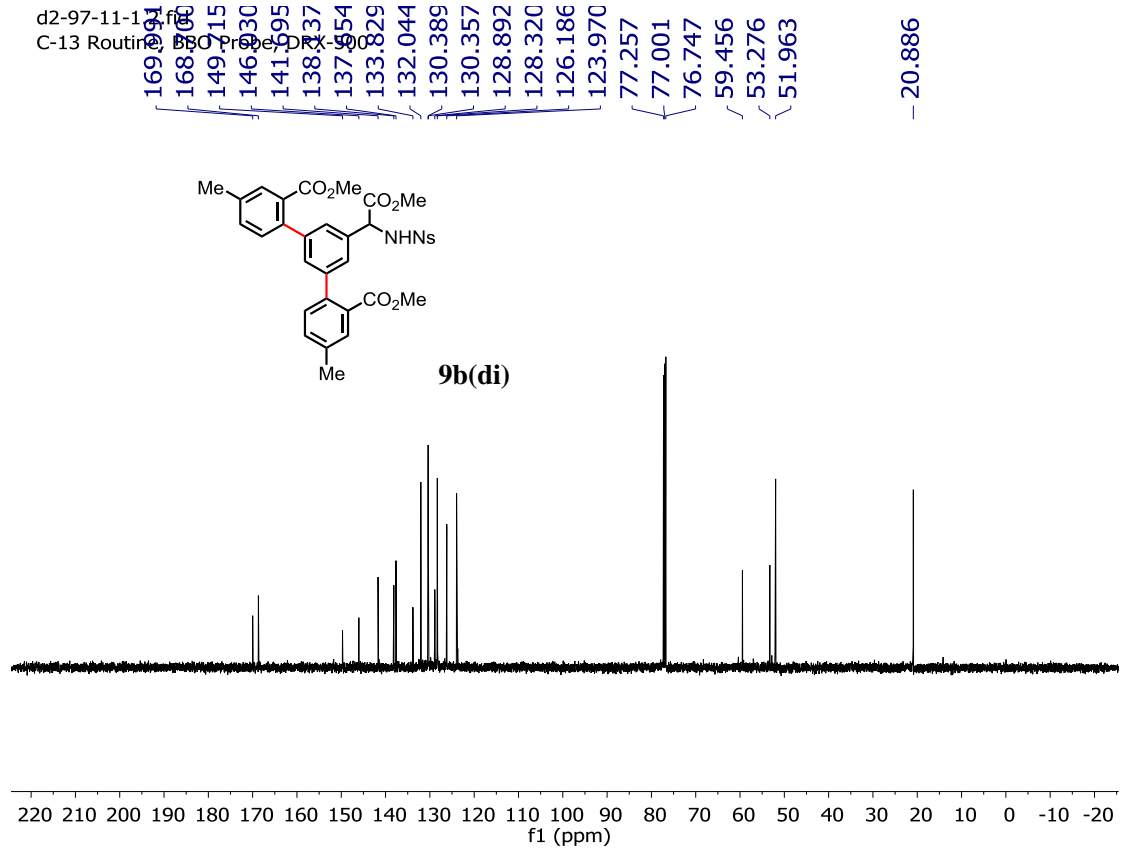



d2-97-9-2.2.fid  
H-1 Routine, DRX-500, BBO Probe

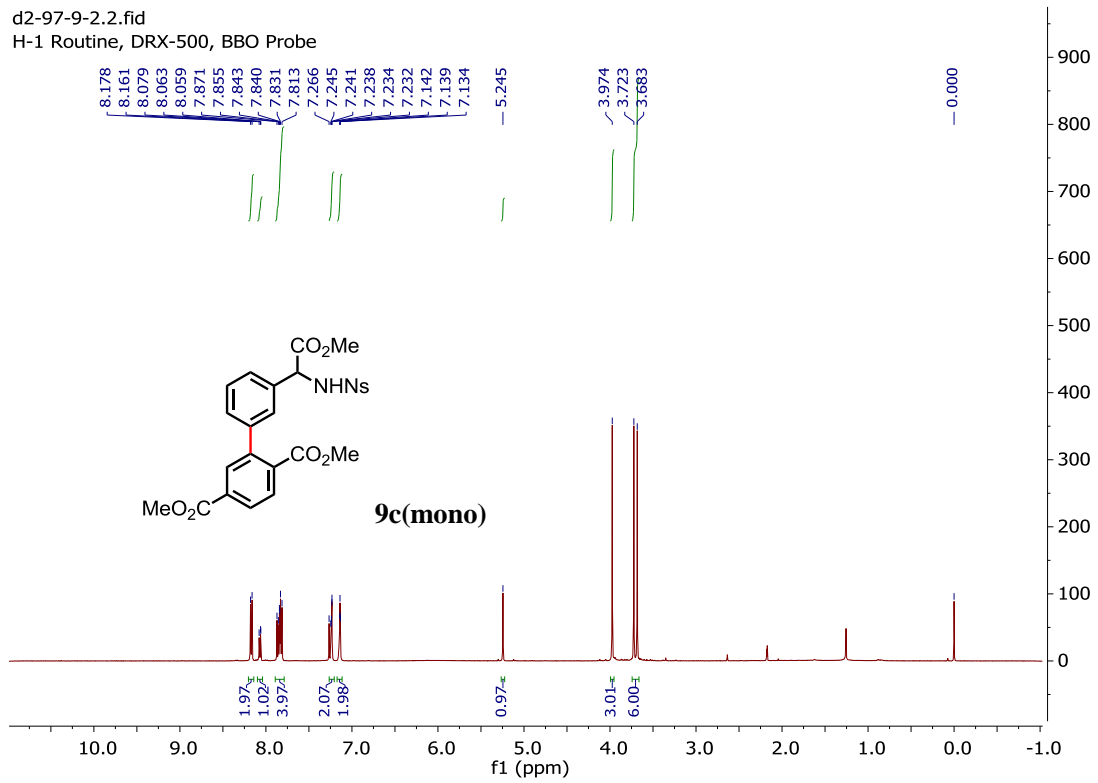

d2-97-9-2.3.fid  
C-13 Routine, BBO Probe, DRX-500

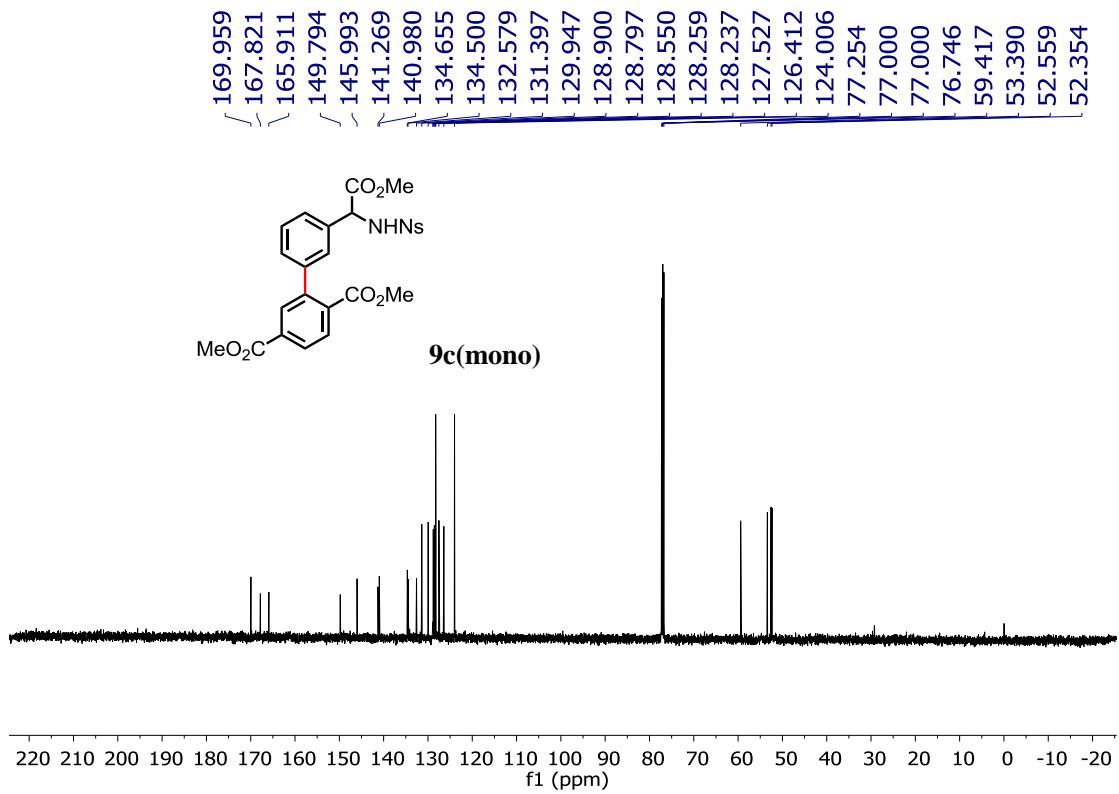

d2-97-9-1.1.fid  
H-1 Routine, DRX-500, BBO Probe

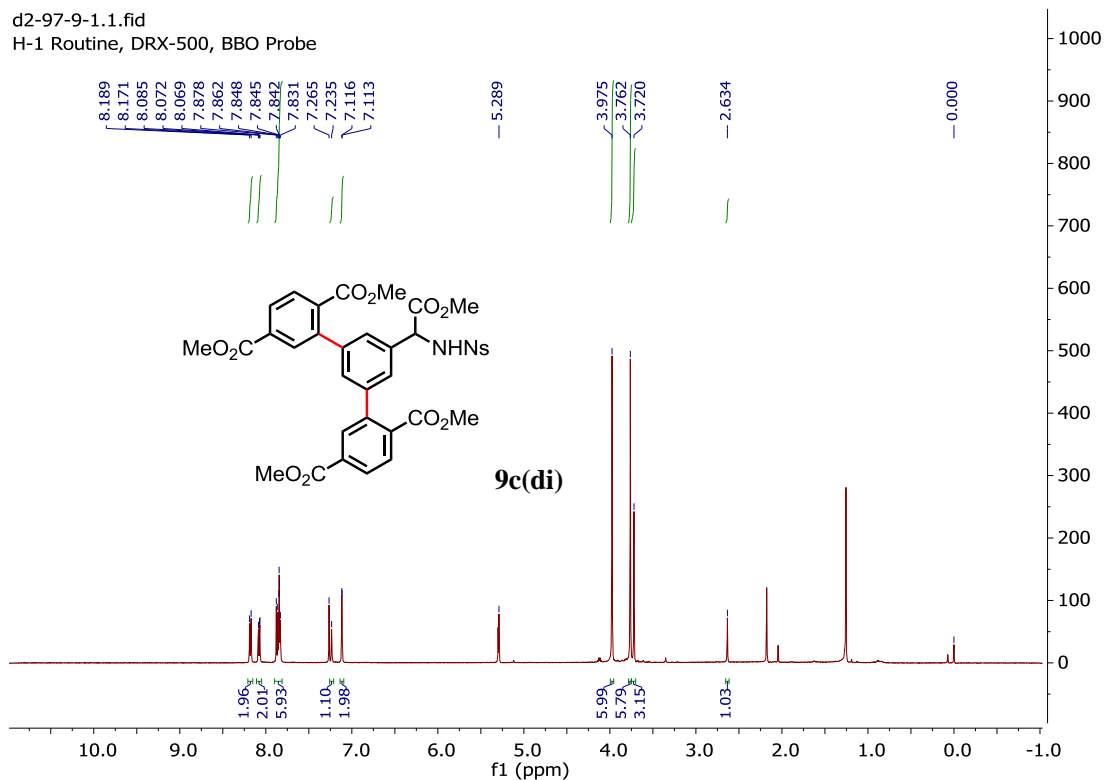

C:/Users/nmruser/Desktop/d2-97-9-1/4/fid

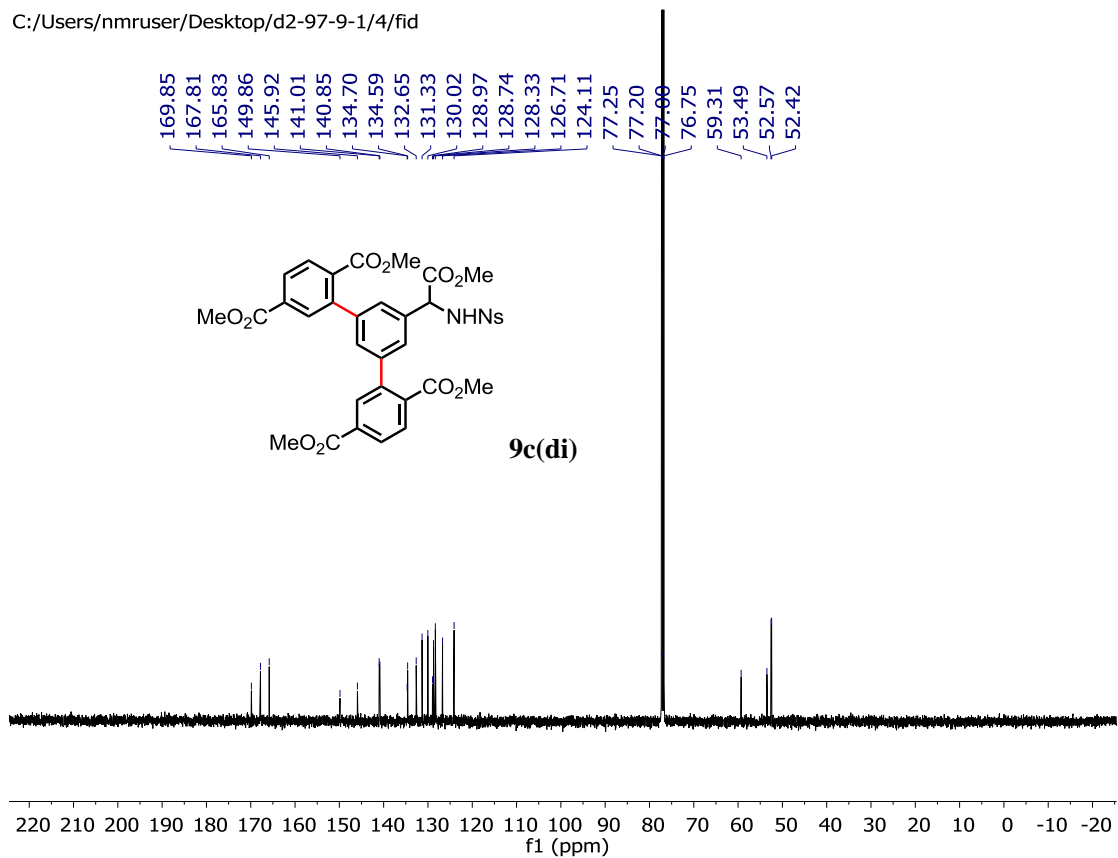



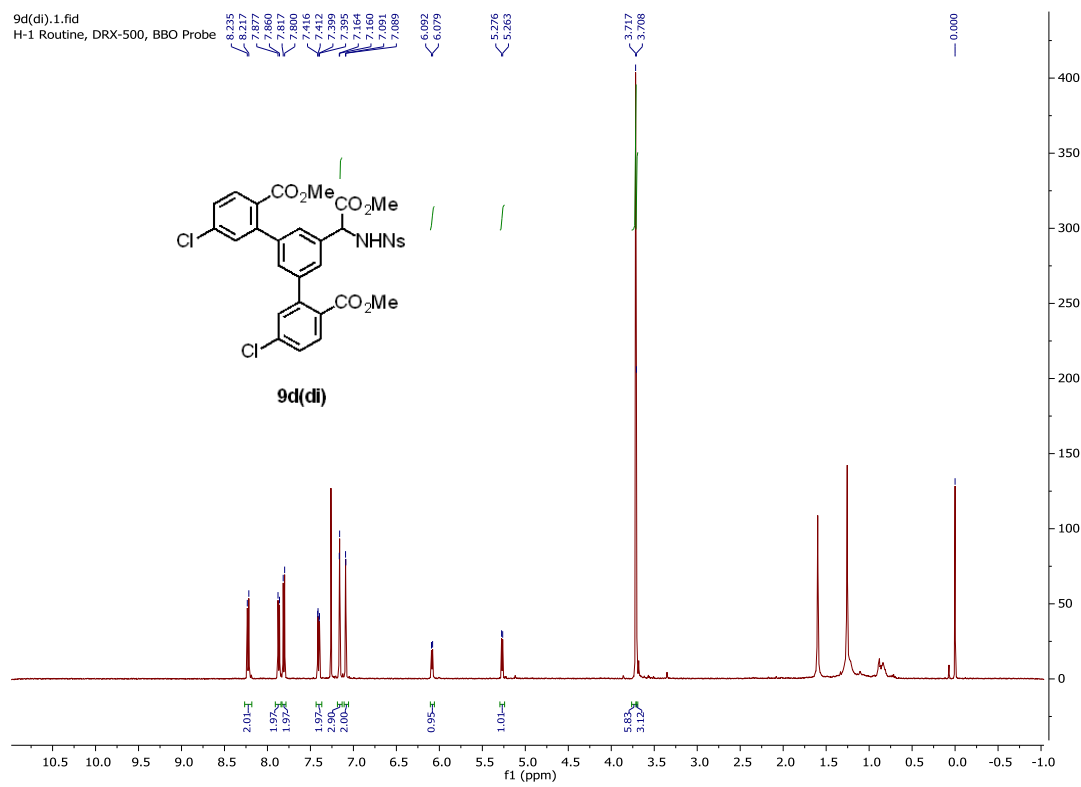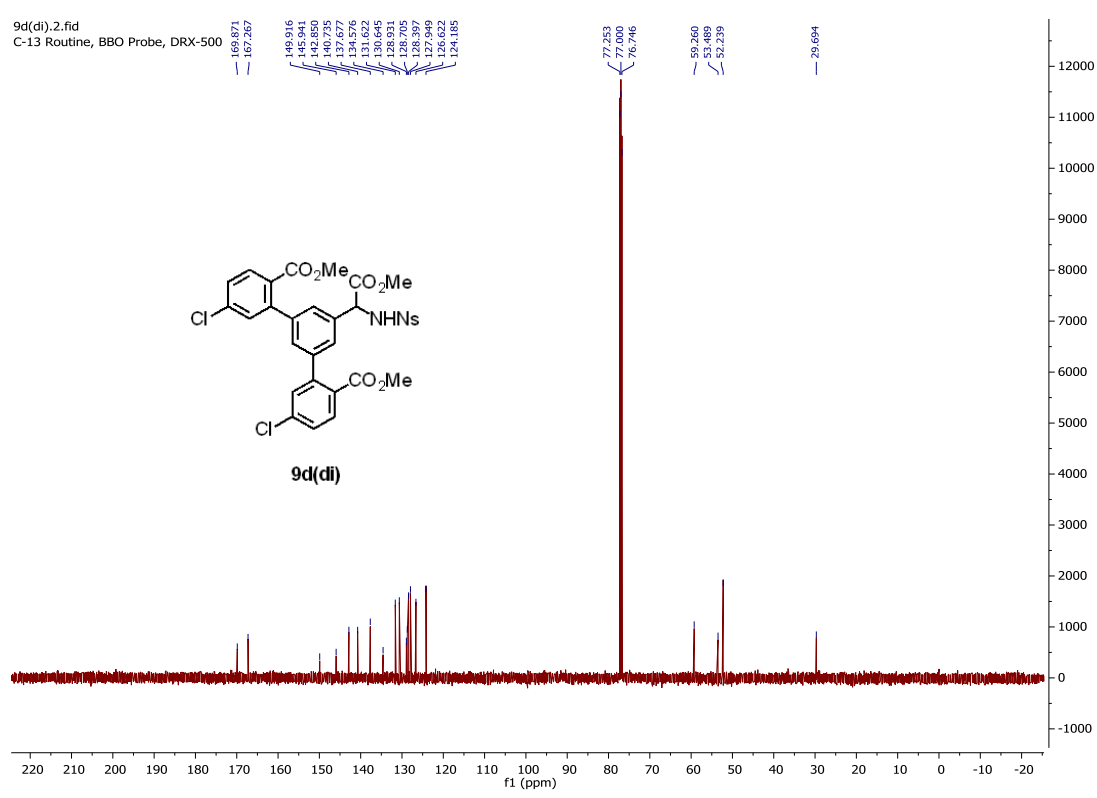

10 H d2-58\_01  
Std proton

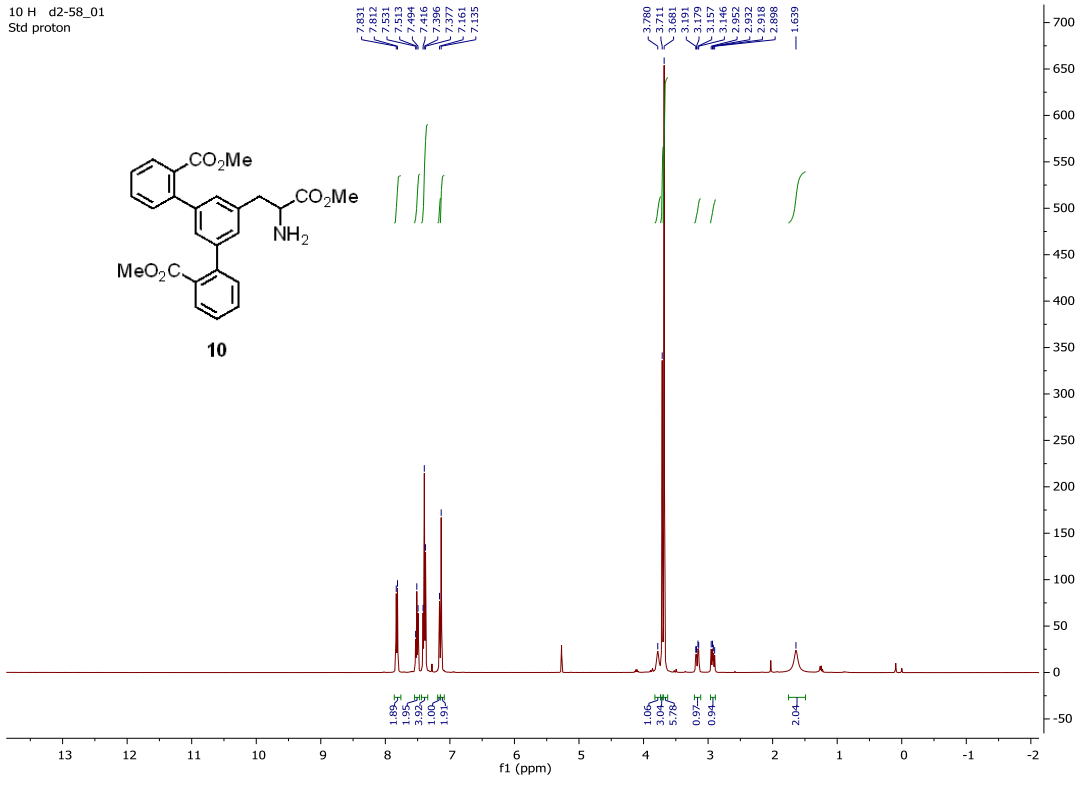

10 C d2-58\_C\_01  
Std proton

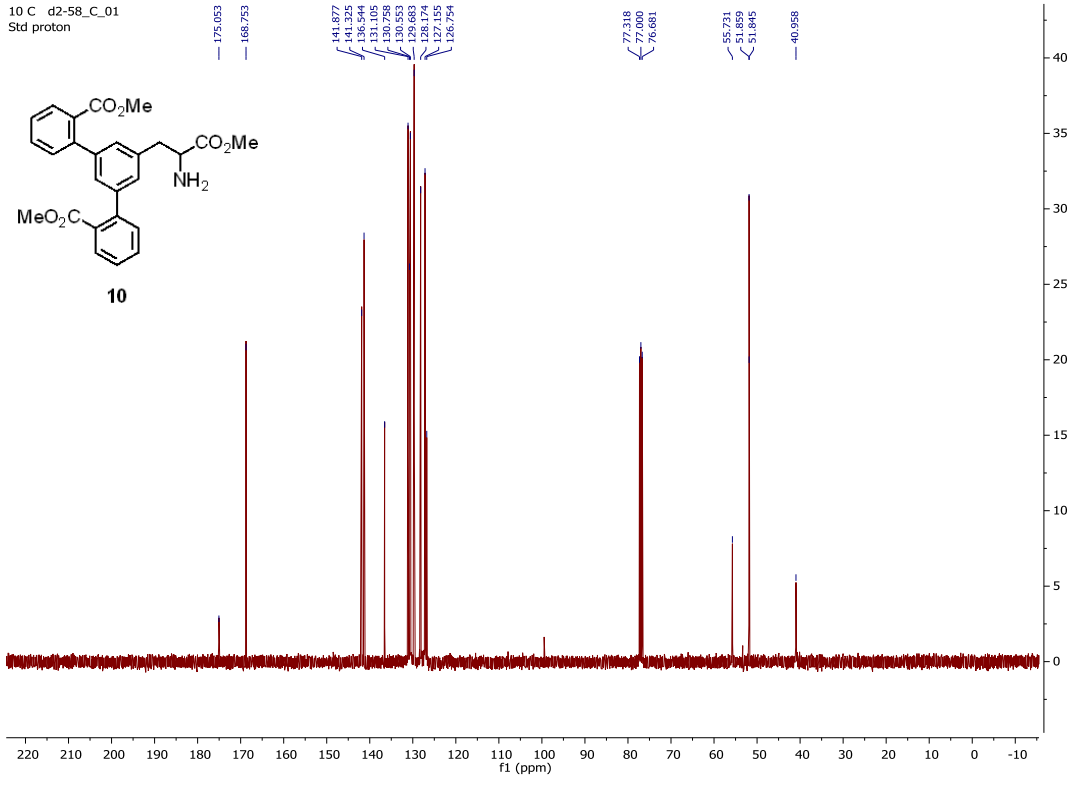

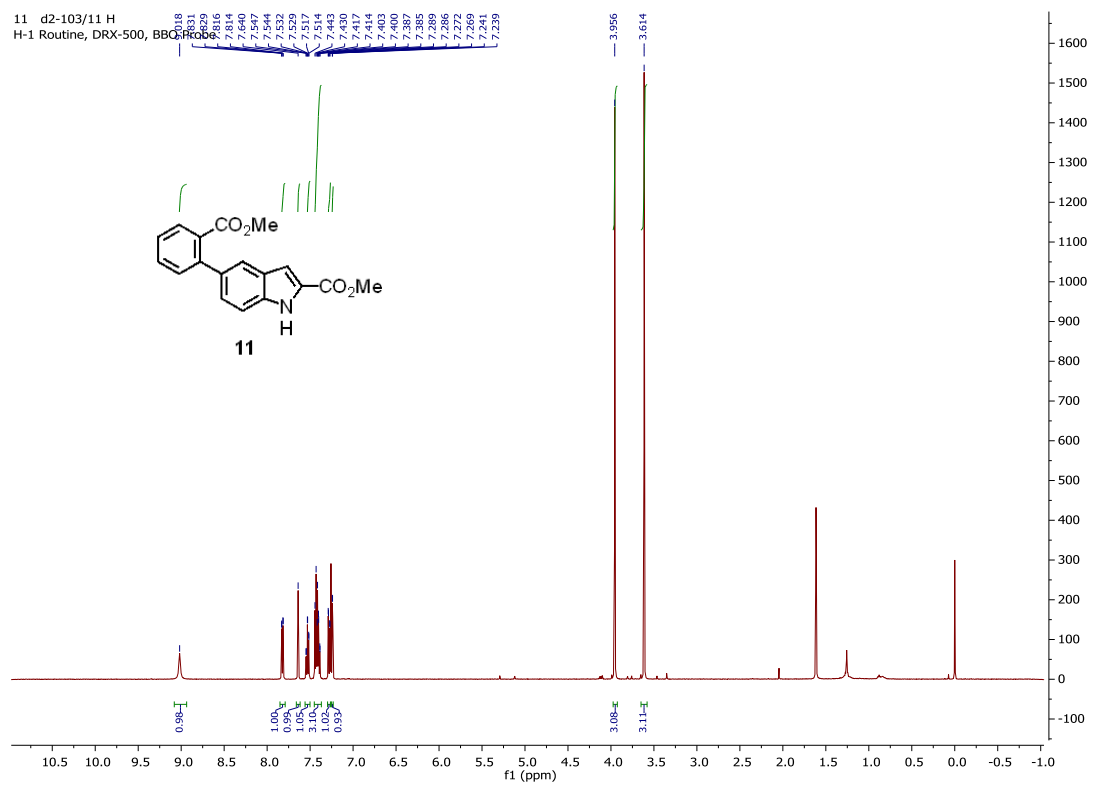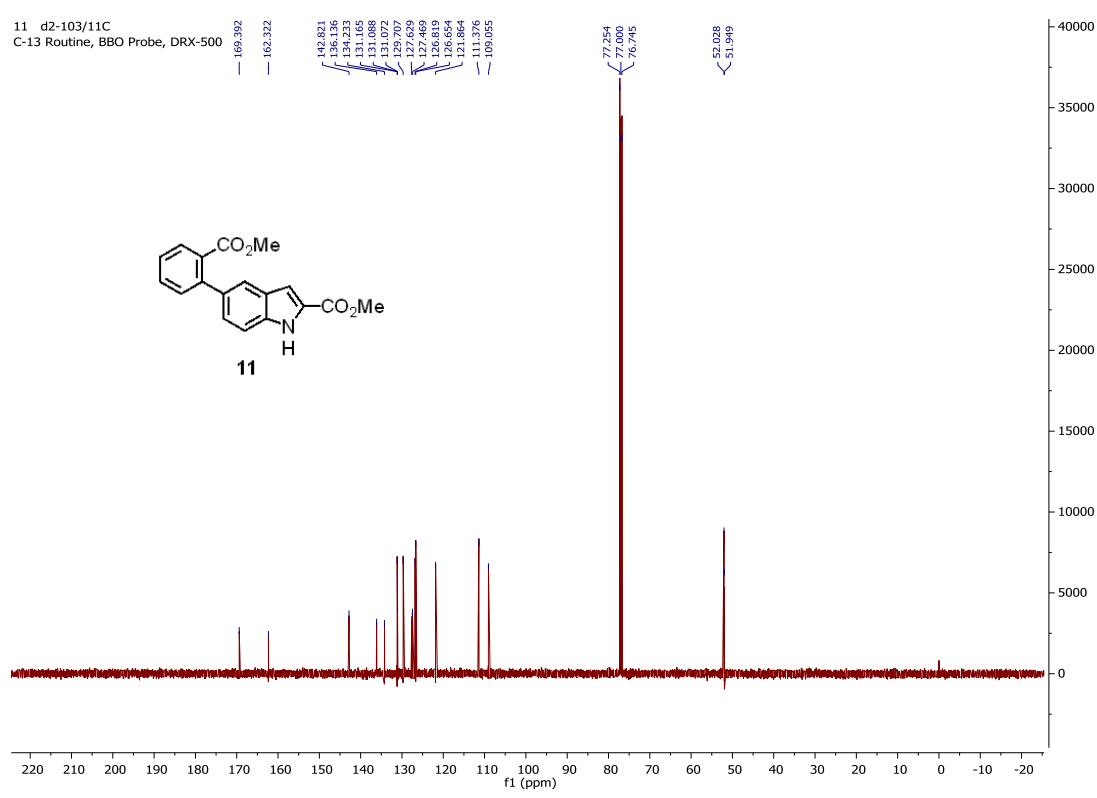

Supplement: NIHMS870068-supplement-SI.pdf [file NIHMS870068-supplement-SI.pdf]
